# Supplementary material for: Highly enantioselective copper-catalyzed propargylic amination to access N-tethered 1,6-enynes
Source: Royal Society of Chemistry journal article supplement (doi:10.1039/d0ra07698h), 2020-01-01

## Supporting Information

### *Highly Enantioselective Copper-Catalyzed Propargylic Amination to Access N-tethered 1,6-*

#### *Enynes*

*Si-Jia Li,<sup>†,§</sup> Jian Huang,<sup>†,§</sup> Jin-Yu He,<sup>†</sup> Rui-Jin Zhang,<sup>†</sup> Hao-Dong Qian,<sup>†</sup> Xue-Lin*

*Dai,<sup>†</sup> Han-Han Kong,<sup>†</sup> and Hao Xu<sup>\*,†</sup>*

<sup>†</sup> CCNU-uOttawa Joint Research Centre, Key Laboratory of Pesticides & Chemical Biology Ministry of Education, International Joint Research Center for Intelligent Biosensing Technology and Health, College of Chemistry, Central China Normal University, 152 Luoyu Road, Wuhan, 430079, China

<sup>§</sup>S. L. and J. H. contributed equally.

| <b>Table of Contents</b>                                                      | <b>page</b> |
|-------------------------------------------------------------------------------|-------------|
| 1. General Information.....                                                   | S2          |
| 2. Optimization Studies.....                                                  | S3          |
| 3. Experimental Procedures.....                                               | S6          |
| 4. Product Characterization.....                                              | S8          |
| 5. Absolute configuration determination.....                                  | S21         |
| 6. Derivatization of the enantiomerically enriched N-tethered 1,6-enynes..... | S22         |
| 7. Formal total synthesis of (+)-Conessine.....                               | S25         |
| 8. X-ray Crystallographic Data.....                                           | S27         |
| 9. NMR Spectra and HPLC Data.....                                             | S30         |

## 1. General Information

Unless otherwise noted, all commercially available compounds were used as provided without further purification. Dry solvents (MeOH, CH<sub>2</sub>Cl<sub>2</sub>, THF, MeCN, toluene) were purified by distillation over the drying agents.

All reactions were monitored by thin-layer chromatography (TLC) on silica gel plates using UV light as visualizing agent. Compounds were visualized by irradiation with UV light or potassium permanganate staining. Flash column chromatography was performed using 200-300 or 300-400 mesh silica gel. Solvent mixtures are understood as volume/volume.

<sup>1</sup>H NMR spectra were recorded on 400 or 600 MHz spectrophotometers, <sup>13</sup>C NMR spectra were recorded on 101 or 150 MHz with complete proton decoupling spectrophotometers using CDCl<sub>3</sub> or CD<sub>2</sub>Cl<sub>2</sub> or CD<sub>3</sub>COCD<sub>3</sub> as solvent. Data were reported in the following order: chemical shift (δ) values are reported in ppm with the solvent resonance as internal standard (CDCl<sub>3</sub>: δ = 7.26 ppm for <sup>1</sup>H, TMS: δ = 0 ppm for <sup>1</sup>H, δ = 77.16 ppm for <sup>13</sup>C; CD<sub>2</sub>Cl<sub>2</sub>: δ = 5.32 ppm for <sup>1</sup>H, δ = 53.84 ppm for <sup>13</sup>C; CD<sub>3</sub>COCD<sub>3</sub>: δ = 2.05 ppm for <sup>1</sup>H, δ = 29.84 ppm for <sup>13</sup>C, δ = 206.26 ppm for <sup>13</sup>C); multiplicities are indicated brs (broadened singlet), s (singlet), d (doublet), t (triplet), q (quartet) m (multiplet); coupling constants (*J*) are given in Hertz (Hz).

Enantiomeric excess (ee) values were determined by chiral HPLC of the purified products. Optical rotations were measured by the polarimeter. All air- and moisture-sensitive reactions were performed under the atmosphere of N<sub>2</sub> in fire dried glasswares.

HRMS was recorded on Agilent technologies 6224 TOF LC/MS instrument or Bruker ultrafleXtreme MALDI-TOF/TOF mass spectrometer.

## 2. Optimization Studies

**Table S1.** The effect of the copper salt on the reaction.

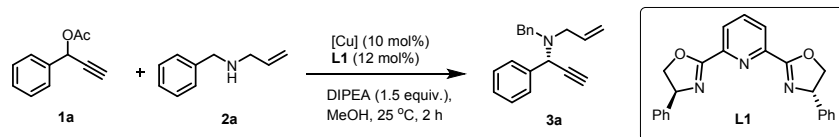

| Entry <sup>a</sup> | [Cu]                                                  | Yield <sup>b</sup> /% | ee <sup>c</sup> /% |
|--------------------|-------------------------------------------------------|-----------------------|--------------------|
| 1                  | CuI                                                   | 81                    | 50                 |
| 2 <sup>d</sup>     | CuI                                                   | 77                    | 50                 |
| 3                  | Cu(CH <sub>3</sub> CN) <sub>4</sub> BF <sub>4</sub>   | 87                    | 21                 |
| 4                  | Cu(CH <sub>3</sub> CN) <sub>4</sub> PF <sub>6</sub>   | 80                    | 49                 |
| 5                  | CuCl                                                  | 75                    | 47                 |
| 6                  | CuOAc                                                 | 77                    | 39                 |
| 7                  | CuOTf•(C <sub>6</sub> H <sub>6</sub> ) <sub>1/2</sub> | 59                    | 44                 |
| 8                  | Cu(OTf) <sub>2</sub>                                  | 34                    | 40                 |
| 9                  | Cu(OAc) <sub>2</sub> •H <sub>2</sub> O                | 73                    | 47                 |

<sup>a</sup> Unless otherwise noted, reactions were conducted with **1a** (0.2 mmol), **2a** (1.5 equiv.) and Copper salts (10 mol%),

chiral ligand **L1** (12 mol%) in MeOH (2.0 mL). <sup>b</sup> Isolated yield. <sup>c</sup> Determined by HPLC analysis on a chiral stationary phase.

<sup>d</sup> Repeat Entry 1.

**Table S2.** The effect of base on the reaction.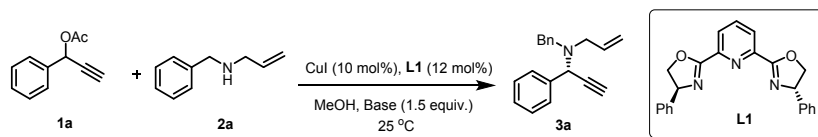

| Entry <sup>a</sup> | Base                            | Time/h   | Yield <sup>b</sup> /% | ee <sup>c</sup> /% |
|--------------------|---------------------------------|----------|-----------------------|--------------------|
| <b>1</b>           | <b>DIPEA</b>                    | <b>2</b> | <b>81</b>             | <b>50</b>          |
| 2 <sup>d</sup>     | DIPEA                           | 2        | 77                    | 50                 |
| 3                  | Et <sub>3</sub> N               | 3        | 80                    | 50                 |
| 4                  | Cs <sub>2</sub> CO <sub>3</sub> | 2        | 35                    | 48                 |
| 5                  | <sup>t</sup> BuOK               | 4        | 33                    | 47                 |
| 6                  | DBU                             | 1        | 70                    | 40                 |
| 7                  | KOH                             | 2        | 73                    | 49                 |
| 8                  | Py                              | 2        | 80                    | 42                 |
| 9                  | Piperidine                      | 4        | 48                    | 51                 |

<sup>a</sup> Unless otherwise noted, reactions were conducted with **1a** (0.2 mmol), **2a** (1.5 equiv.) Copper salts (10 mol%), and chiral ligand **L1** (12 mol%) in MeOH (2.0 mL). <sup>b</sup> Isolated yield. <sup>c</sup> Determined by HPLC analysis on a chiral stationary phase. <sup>d</sup> Repeat Entry **1**

**Table S3.** The effect of the ligand on the reaction.

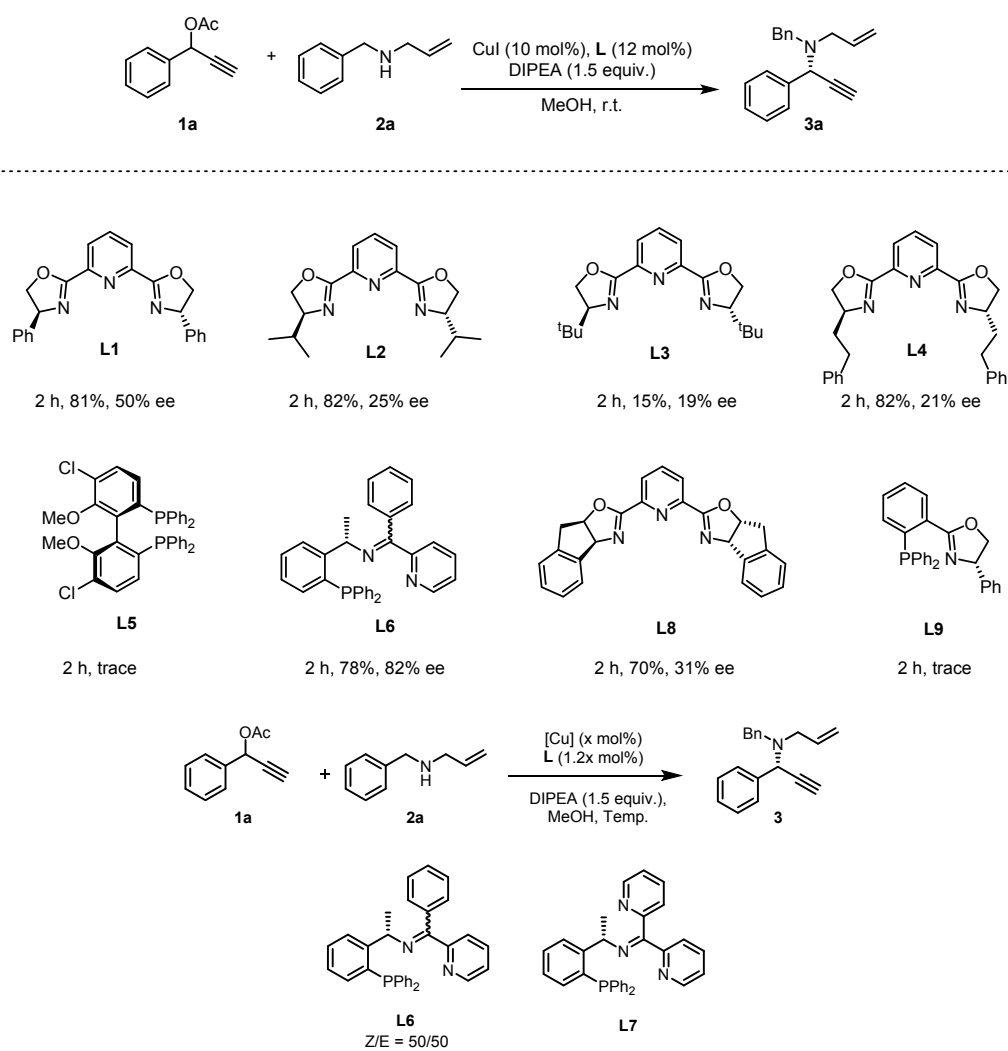

| Entry <sup>a</sup> | [Cu]                                                | x        | L         | T/°C       | Time/h   | Yield <sup>b</sup> /% | ee <sup>c</sup> /% |
|--------------------|-----------------------------------------------------|----------|-----------|------------|----------|-----------------------|--------------------|
| 1                  | CuI                                                 | 10       | <b>L6</b> | 25         | 2        | 78                    | 82                 |
| 2                  | CuI                                                 | 10       | <b>L7</b> | 25         | 2        | 83                    | 86                 |
| 3                  | Cu(CH <sub>3</sub> CN) <sub>4</sub> PF <sub>6</sub> | 10       | <b>L7</b> | 25         | 3        | 90                    | 91                 |
| 4                  | Cu(OAc) <sub>2</sub> •H <sub>2</sub> O              | 10       | <b>L7</b> | 25         | 2        | 87                    | 93                 |
| 5                  | Cu(OAc) <sub>2</sub> •H <sub>2</sub> O              | 5        | <b>L7</b> | 25         | 2        | 64                    | 91                 |
| 6                  | Cu(OAc) <sub>2</sub> •H <sub>2</sub> O              | 5        | <b>L7</b> | 0          | 3        | 84                    | 97                 |
| 7                  | <b>Cu(OAc)<sub>2</sub>•H<sub>2</sub>O</b>           | <b>5</b> | <b>L7</b> | <b>-20</b> | <b>3</b> | <b>90</b>             | <b>97</b>          |
| 8                  | Cu(OAc) <sub>2</sub> •H <sub>2</sub> O              | 2.5      | <b>L7</b> | -20        | 24       | 77                    | 96                 |
| 9                  | Cu(OAc) <sub>2</sub> •H <sub>2</sub> O              | 5        | <b>L7</b> | -40        | 4        | 93                    | 97                 |

<sup>a</sup> Unless otherwise noted, reactions were conducted with **1a** (0.2 mmol), **2a** (1.5 equiv.), MeOH (2.0 mL). <sup>b</sup> Isolated Yield. <sup>c</sup> Determined by HPLC analysis on a chiral stationary phase.

### 3. Experimental Procedures

#### Procedure A: Synthesis of chiral *P,N,N*-ligand.

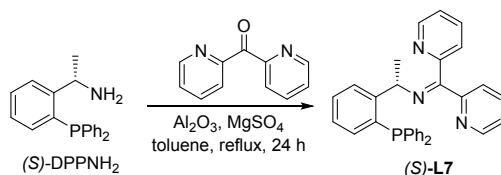

To a solution of (*S*)-DPPNH<sub>2</sub> (160 mg, 1.05 equiv.) in 3 mL anhydrous toluene was added di(2-pyridyl) ketone (92 mg, 0.5 mmol), active Al<sub>2</sub>O<sub>3</sub> (250 mg), and anhydrous MgSO<sub>4</sub> (250 mg). The reaction mixture was refluxed for 13 h under nitrogen atmosphere, then cooled to room temperature. Al<sub>2</sub>O<sub>3</sub> and MgSO<sub>4</sub> were removed by the filtration. The filtrate was concentrated under reduced pressure, and the residue was purified by column chromatography on silica gel.

[1] F.-L. Zhu, X.-P. Hu, *Angew. Chem. Int. Ed.* **2014**, *53*, 1410–1414.

#### Procedure B: General procedure for the preparation of racemic products.

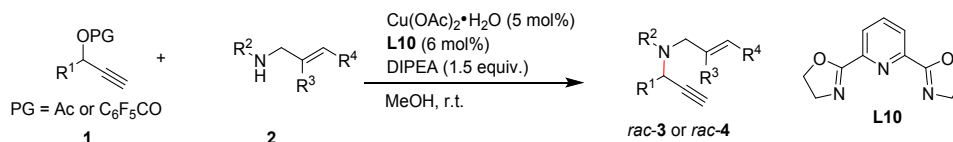

In a schlenk tube, Cu(OAc)<sub>2</sub>·H<sub>2</sub>O (5 mol%) and **L10** (6 mol%) were stirred at room temperature in anhydrous methanol (1 mL) under nitrogen atmosphere for 1 h. *N*-allyl amine **2** (0.3 mmol, 1.5 equiv.) and the solution of **1** (0.2 mmol, 1 equiv.) in anhydrous methanol (1 mL) was added to the above solution. Subsequently, <sup>i</sup>Pr<sub>2</sub>NEt (1.5 equiv.) was added. After the reaction was finished according to TLC, the solvent was removed under reduced pressure and the obtained residue was then purified by silica gel chromatography using petroleum ether (40-60 °C)/ethyl acetate as eluent, affording *N*-tethered 1,6-enynes *rac*-**3** or *rac*-**4**.

#### Procedure C: General procedure for the preparation of enantioenriched product

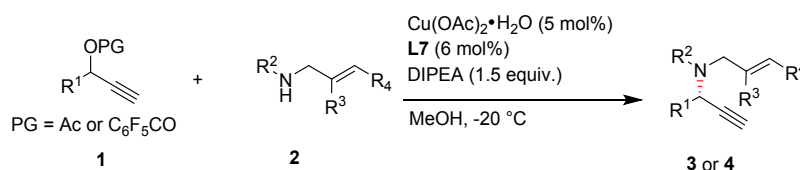

In a schlenk tube, Cu(OAc)<sub>2</sub>·H<sub>2</sub>O (5 mol%) and **L7** (6 mol%) were stirred at room temperature in anhydrous methanol (1 mL) under nitrogen atmosphere for 1 h. *N*-allyl amine **2** (0.3 mmol, 1.5 equiv.) was added, then the solution of propargyl ester **1** (0.2 mmol, 1 equiv.) in anhydrous methanol (1 mL) was added. Subsequently, <sup>i</sup>Pr<sub>2</sub>NEt (1.5 equiv.) was added at -20 °C. After the reaction was finished according to TLC, the solvent was removed under reduced pressure and the obtained residue was then purified by silica gel chromatography using petroleum ether (40-60 °C)/ethyl acetate as eluent, affording chiral *N*-tethered 1,6-enynes **3** or **4**.

#### Procedure D: Synthesis of propargyl esters according to the following literature:

[2] a) M. J. Ardolino, M. S. Eno, J. P. Morken, *Adv. Synth. Catal.* **2013**, *355*, 3413-3419. b) A. Yoshida, G. Hattori, Y. Miyake, Y. Nishibayashi, *Org. Lett.* **2011**, *13*, 2460-2463.

#### Procedure E: Synthesis of allyl benzylamine according to the following literature:

[3] M.-Y. Wang, L.-N. He, S.-H. Li, *Green Chem.*, **2017**, *19*, 1240-1244.

#### 4. Product Characterization

##### (*S*)-*N*-(1-(2-(diphenylphosphanyl)phenyl)ethyl)-1,1-di(pyridin-2-yl)methanimine

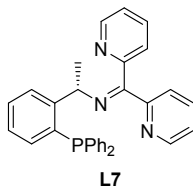

**L7:** 13 h, 66% yield; amorphous yellow solid; According to procedure A;  $^1\text{H}$  NMR (400 MHz, Methylene Chloride- $d_2$ )  $\delta$  8.58 (d,  $J = 4.8$  Hz, 1H), 8.41 (d,  $J = 4.8$  Hz, 1H), 8.29 (d,  $J = 8.0$  Hz, 1H), 8.06 (dd,  $J = 7.6, 3.8$  Hz, 1H), 7.78 (td,  $J = 7.8, 1.8$  Hz, 1H), 7.60 (td,  $J = 7.8, 1.8$  Hz, 1H), 7.42 (t,  $J = 7.6$  Hz, 1H), 7.32 – 7.25 (m, 8H), 7.15 – 7.09 (m, 3H), 7.07 – 7.03 (m, 2H), 6.93 (d,  $J = 7.8$  Hz, 1H), 6.83 (dd,  $J = 7.8, 4.2$  Hz, 1H), 5.50 – 5.43 (m, 1H), 1.31 (d,  $J = 6.4$  Hz, 3H).  $^{13}\text{C}$  NMR (151 MHz, Methylene Chloride- $d_2$ )  $\delta$  165.47, 157.81, 155.99, 151.33, 151.17, 149.93, 148.92, 137.76, 137.68, 137.67, 137.60, 136.75, 136.25, 134.69, 134.55, 134.39, 134.30, 134.18, 133.97, 133.84, 129.93, 129.22, 128.99, 128.98, 128.94, 128.91, 128.09, 128.06, 127.34, 124.64, 124.03, 123.36, 122.60, 59.62, 59.45, 25.66.  $^{31}\text{P}$  NMR (162 MHz, Methylene Chloride- $d_2$ )  $\delta$  -18.18. HRMS: calcd. for  $[\text{M}+\text{H}]^+$   $\text{C}_{31}\text{H}_{27}\text{N}_3\text{P} = 472.19371$ , found: 472.19331;  $[\alpha]_D^{25} = -46.37$  ( $c = 1.0$  in  $\text{CHCl}_3$ );

##### (*R*)-*N*-benzyl-*N*-(1-phenylprop-2-yn-1-yl)prop-2-en-1-amine

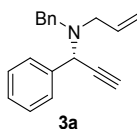

**3a:** 3 h, 90% yield; slightly yellow liquid; According to procedure C;  $^1\text{H}$  NMR (400 MHz, Chloroform- $d$ )  $\delta$  7.65 (d,  $J = 8.2$  Hz, 2H), 7.38 – 7.20 (m, 8H), 5.89 – 5.79 (m, 1H), 5.29 (d,  $J = 17.2$  Hz, 1H), 5.13 (d,  $J = 10.2$  Hz, 1H), 4.82 (s, 1H), 3.79 (d,  $J = 13.6$  Hz, 1H), 3.40 (d,  $J = 13.6$  Hz, 1H), 3.19 – 3.14 (m, 1H), 3.02 – 2.96 (m, 1H), 2.57 (d,  $J = 2.4$  Hz, 1H).  $^{13}\text{C}$  NMR (101 MHz,  $\text{CDCl}_3$ )  $\delta$  139.65, 138.80, 136.56, 128.92, 128.39, 128.22, 127.60, 127.09, 117.63, 79.18, 75.87, 55.75, 54.51, 53.39. HRMS: calcd. for  $[\text{M}+\text{H}]^+$   $\text{C}_{19}\text{H}_{20}\text{N} = 262.15903$ , found: 262.15972;  $[\alpha]_D^{25} = -90.50$  ( $c = 1.0$  in  $\text{CHCl}_3$ ); HPLC conditions: CHIRALPAK ODH column, hexane/ $\text{PrOH} = 99/1$ , flow rate =  $0.5 \text{ mL min}^{-1}$ ,  $\lambda = 254 \text{ nm}$ , major enantiomer:  $t_R = 7.1 \text{ min}$ ; minor enantiomer:  $t_R = 7.9 \text{ min}$ , 97% ee.

##### (*R*)-*N*-benzyl-*N*-(1-(*p*-tolyl)prop-2-yn-1-yl)prop-2-en-1-amine

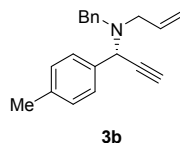

**3b:** 3 h, 82% yield; slightly yellow liquid; According to procedure C;  $^1\text{H}$  NMR (400 MHz, Chloroform- $d$ )  $\delta$  7.48 (d,  $J = 7.8$  Hz, 2H), 7.32 (d,  $J = 7.4$  Hz, 2H), 7.26 – 7.22 (m, 2H), 7.18 – 7.14 (m, 1H), 7.09 (d,  $J = 7.8$  Hz, 2H), 5.84 – 5.74 (m, 1H), 5.24 (d,  $J = 17.6$  Hz, 1H), 5.08 (d,  $J = 9.8$  Hz, 1H), 4.73 (s, 1H), 3.74 (d,  $J = 13.6$  Hz, 1H), 3.34 (d,  $J = 13.6$  Hz, 1H), 3.14 – 3.10 (m, 1H), 2.94 (dd,  $J = 14.2, 8.4$  Hz, 1H), 2.50 (d,  $J = 2.2$  Hz, 1H), 2.28 (s, 3H).  $^{13}\text{C}$  NMR (101 MHz,  $\text{CDCl}_3$ )  $\delta$  139.73, 137.19, 136.62, 135.77, 128.91, 128.89, 128.36, 128.13, 127.03, 117.54, 79.42, 75.65, 55.49, 54.41, 53.33, 21.23. HRMS: calcd. for  $[\text{M}+\text{H}]^+$   $\text{C}_{20}\text{H}_{22}\text{N} = 276.17468$ , found: 276.17535;  $[\alpha]_D^{25} = -65.13$  ( $c = 1.0$  in  $\text{CHCl}_3$ ); HPLC conditions: CHIRALPAK IBN-5 column, hexane/ $\text{PrOH} = 99.9/0.1$ , flow rate =  $0.3 \text{ mL min}^{-1}$ ,  $\lambda = 234 \text{ nm}$ , major enantiomer:  $t_R = 12.4 \text{ min}$ ; minor enantiomer:  $t_R = 18.4 \text{ min}$ , 99% ee.

##### (*R*)-*N*-benzyl-*N*-(1-(4-fluorophenyl)prop-2-yn-1-yl)prop-2-en-1-amine



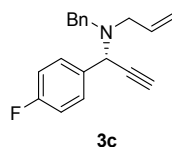

**3c:** 5 h, 93% yield; slightly yellow liquid; According to procedure C;  $^1\text{H NMR}$  (400 MHz, Chloroform- $d$ )  $\delta$  7.55 – 7.51 (m, 2H), 7.29 – 7.13 (m, 5H), 6.93 (t,  $J$  = 8.8 Hz, 2H), 5.79 – 5.69 (m, 1H), 5.20 (d,  $J$  = 17.0 Hz, 1H), 5.06 (d,  $J$  = 10.0 Hz, 1H), 4.68 (s, 1H), 3.70 (d,  $J$  = 13.6 Hz, 1H), 3.31 (d,  $J$  = 13.6 Hz, 1H), 3.09 – 3.04 (m, 1H), 2.90 (dd,  $J$  = 14.0, 8.4 Hz, 1H), 2.51 (d,  $J$  = 2.2 Hz, 1H).  $^{13}\text{C NMR}$  (101 MHz,  $\text{CDCl}_3$ )  $\delta$  162.35 (d,  $J$  = 245.7 Hz), 139.48, 136.39, 134.55 (d,  $J$  = 3.0 Hz), 129.83 (d,  $J$  = 8.1 Hz), 128.90, 128.44, 127.18, 117.75, 115.01 (d,  $J$  = 21.5 Hz), 78.96, 76.11, 55.14, 54.51, 53.33.  $^{19}\text{F NMR}$  (376 MHz,  $\text{CDCl}_3$ )  $\delta$  -115.47. HRMS: calcd. for  $[\text{M}+\text{H}]^+$   $\text{C}_{19}\text{H}_{19}\text{FN}$  = 280.14960, found: 280.14975;  $[\alpha]_D^{25}$  = -96.80 ( $c$  = 1.0 in  $\text{CHCl}_3$ ); HPLC conditions: CHIRALPAK IBN-5 column, hexane/ $i$ PrOH = 99.9/0.1, flow rate = 0.3 mL  $\text{min}^{-1}$ ,  $\lambda$  = 254 nm, major enantiomer:  $t_R$  = 13.0 min; minor enantiomer:  $t_R$  = 15.0 min, 98% ee.

**(R)-N-benzyl-N-(1-(4-bromophenyl)prop-2-yn-1-yl)prop-2-en-1-amine**

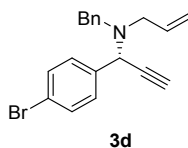

**3d:** 3 h, 85% yield; slightly yellow liquid; According to procedure C;  $^1\text{H NMR}$  (400 MHz, Chloroform- $d$ )  $\delta$  7.45 (d,  $J$  = 8.2 Hz, 2H), 7.38 (d,  $J$  = 8.4 Hz, 2H), 7.29 – 7.21 (m, 4H), 7.19 – 7.14 (m, 1H), 5.79 – 5.69 (m, 1H), 5.21 (d,  $J$  = 17.2 Hz, 1H), 5.07 (d,  $J$  = 10.0 Hz, 1H), 4.66 (s, 1H), 3.69 (d,  $J$  = 13.6 Hz, 1H), 3.31 (d,  $J$  = 13.6 Hz, 1H), 3.08 – 3.04 (m, 1H), 2.90 (dd,  $J$  = 14.0, 8.4 Hz, 1H), 2.52 (d,  $J$  = 2.2 Hz, 1H).  $^{13}\text{C NMR}$  (101 MHz,  $\text{CDCl}_3$ )  $\delta$  139.36, 138.03, 136.29, 131.33, 129.98, 128.90, 128.47, 127.23, 121.57, 117.85, 78.61, 76.31, 55.33, 54.58, 53.40. HRMS: calcd. for  $[\text{M}+\text{H}]^+$   $\text{C}_{19}\text{H}_{19}^{79}\text{BrN}$  = 340.06954, found: 340.06962;  $[\alpha]_D^{25}$  = -29.03 ( $c$  = 1.0 in  $\text{CHCl}_3$ ); HPLC conditions: CHIRALPAK IBN-5 column, hexane/ $i$ PrOH = 99.9/0.1, flow rate = 0.3 mL  $\text{min}^{-1}$ ,  $\lambda$  = 254 nm, major enantiomer:  $t_R$  = 13.1 min; minor enantiomer:  $t_R$  = 14.8 min, 97% ee.

**(R)-4-(1-(allyl(benzyl)amino)prop-2-yn-1-yl)benzonitrile**

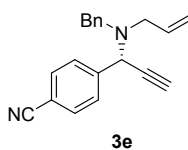

**3e:** 5 h, 82% yield; slightly yellow liquid; According to procedure C;  $^1\text{H NMR}$  (400 MHz, Chloroform- $d$ )  $\delta$  7.69 (d,  $J$  = 8.2 Hz, 2H), 7.54 (d,  $J$  = 8.4 Hz, 2H), 7.28 – 7.21 (m, 4H), 7.18 – 7.14 (m, 1H), 5.78 – 5.68 (m, 1H), 5.21 (d,  $J$  = 17.4 Hz, 1H), 5.08 (d,  $J$  = 10.2 Hz, 1H), 4.72 (s, 1H), 3.68 (d,  $J$  = 13.6 Hz, 1H), 3.34 (d,  $J$  = 13.6 Hz, 1H), 3.05 – 3.01 (m, 1H), 2.91 (dd,  $J$  = 14.0, 8.4 Hz, 1H), 2.57 (d,  $J$  = 2.2 Hz, 1H).  $^{13}\text{C NMR}$  (101 MHz,  $\text{CDCl}_3$ )  $\delta$  144.54, 138.94, 135.91, 132.07, 128.93, 128.88, 128.54, 127.40, 118.94, 118.19, 111.53, 77.78, 76.99, 55.64, 54.80, 53.56. HRMS: calcd. for  $[\text{M}+\text{H}]^+$   $\text{C}_{20}\text{H}_{19}\text{N}_2$  = 287.15428, found: 287.15471;  $[\alpha]_D^{25}$  = -9.87 ( $c$  = 1.0 in  $\text{CHCl}_3$ ); HPLC conditions: CHIRALPAK IBN-5 column, hexane/ $i$ PrOH = 99.9/0.1, flow rate = 0.3 mL  $\text{min}^{-1}$ ,  $\lambda$  = 254 nm, major enantiomer:  $t_R$  = 27.1 min; minor enantiomer:  $t_R$  = 34.6 min, 97% ee.

**Methyl (R)-4-(1-(allyl(benzyl)amino)prop-2-yn-1-yl)benzoate**

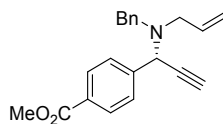

**3f**

**3f:** 15 h, 81% yield; slightly yellow liquid; According to procedure C;  $^1\text{H NMR}$  (600 MHz, Chloroform- $d$ )  $\delta$  7.92 (d,  $J = 8.0$  Hz, 2H), 7.64 (d,  $J = 8.0$  Hz, 2H), 7.27 (d,  $J = 7.4$  Hz, 2H), 7.21 (t,  $J = 7.4$  Hz, 2H), 7.14 – 7.12 (m, 1H), 5.76 – 5.71 (s, 1H), 5.20 (d,  $J = 17.2$  Hz, 1H), 5.05 (d,  $J = 10.2$  Hz, 1H), 4.74 (s, 1H), 3.80 (s, 3H), 3.67 (d,  $J = 13.6$  Hz, 1H), 3.32 (d,  $J = 13.6$  Hz, 1H), 3.04 (d,  $J = 13.0$  Hz, 1H), 2.90 (dd,  $J = 13.8, 8.6$  Hz, 1H), 2.53 (s, 1H).  $^{13}\text{C NMR}$  (151 MHz,  $\text{CDCl}_3$ )  $\delta$  167.02, 144.17, 139.23, 136.18, 129.51, 128.89, 128.44, 128.22, 127.23, 117.91, 78.40, 76.48, 55.66, 54.65, 53.48, 52.16. HRMS: calcd. for  $[\text{M}+\text{H}]^+$   $\text{C}_{21}\text{H}_{22}\text{NO}_2 = 320.16451$ , found: 320.16547;  $[\alpha]_D^{25} = -9.33$  ( $c = 1.0$  in  $\text{CHCl}_3$ ); HPLC conditions: CHIRALPAK ADH column, hexane/ $\text{PrOH} = 99.9/0.1$ , flow rate =  $0.3 \text{ mL min}^{-1}$ ,  $\lambda = 254 \text{ nm}$ , minor enantiomer:  $t_R = 28.0 \text{ min}$ ; major enantiomer:  $t_R = 31.2 \text{ min}$ , 98% ee.

**(R)-N-benzyl-N-(1-(4-methoxyphenyl)prop-2-yn-1-yl)prop-2-en-1-amine**

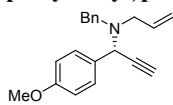

**3g**

**3g:** 4 h, 74% yield; slightly yellow liquid; According to procedure C;  $^1\text{H NMR}$  (400 MHz, Chloroform- $d$ )  $\delta$  7.55 (d,  $J = 7.4$  Hz, 2H), 7.36 (d,  $J = 7.8$  Hz, 2H), 7.29 (t,  $J = 7.4$  Hz, 2H), 7.23 – 7.20 (m, 1H), 6.88 – 6.85 (m, 2H), 5.88 – 5.78 (m, 1H), 5.28 (d,  $J = 18.2$  Hz, 1H), 5.13 (d,  $J = 10.2$  Hz, 1H), 4.76 (s, 1H), 3.80 – 3.77 (m, 4H), 3.38 (d,  $J = 13.6$  Hz, 1H), 3.19 – 3.14 (m, 1H), 2.98 (dd,  $J = 13.8, 8.4$  Hz, 1H), 2.56 (d,  $J = 1.6$  Hz, 1H).  $^{13}\text{C NMR}$  (101 MHz,  $\text{CDCl}_3$ )  $\delta$  159.08, 139.75, 136.64, 130.84, 129.35, 128.89, 128.36, 127.04, 117.51, 113.55, 79.50, 75.65, 55.38, 55.17, 54.38, 53.26. HRMS: calcd. for  $[\text{M}+\text{H}]^+$   $\text{C}_{20}\text{H}_{22}\text{NO} = 292.16959$ , found: 292.17042;  $[\alpha]_D^{25} = -122.73$  ( $c = 1.0$  in  $\text{CHCl}_3$ ); HPLC conditions: CHIRALPAK ODH column, hexane/ $\text{PrOH} = 99/1$ , flow rate =  $0.5 \text{ mL min}^{-1}$ ,  $\lambda = 234 \text{ nm}$ , major enantiomer:  $t_R = 9.4 \text{ min}$ ; minor enantiomer:  $t_R = 15.9 \text{ min}$ , 90% ee.

**(R)-N-benzyl-N-(1-(*m*-tolyl)prop-2-yn-1-yl)prop-2-en-1-amine**

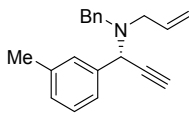

**3h**

**3h:** 13 h, 96% yield; slightly yellow liquid; According to procedure C;  $^1\text{H NMR}$  (400 MHz, Chloroform- $d$ )  $\delta$  7.37 – 7.36 (m, 2H), 7.29 (d,  $J = 7.4$  Hz, 2H), 7.21 (t,  $J = 7.4$  Hz, 2H), 7.16 – 7.12 (m, 2H), 6.98 (d,  $J = 7.4$  Hz, 1H), 5.81 – 5.71 (m, 1H), 5.20 (d,  $J = 17.2$  Hz, 1H), 5.06 (d,  $J = 10.2$  Hz, 1H), 4.71 (s, 1H), 3.70 (d,  $J = 13.6$  Hz, 1H), 3.32 (d,  $J = 13.6$  Hz, 1H), 3.12 – 3.07 (m, 1H), 2.91 (dd,  $J = 14.0, 8.4$  Hz, 1H), 2.48 (d,  $J = 2.2$  Hz, 1H), 2.28 (s, 3H).  $^{13}\text{C NMR}$  (101 MHz,  $\text{CDCl}_3$ )  $\delta$  139.69, 138.69, 137.76, 136.60, 128.92, 128.89, 128.37, 128.33, 128.10, 127.05, 125.35, 117.59, 79.35, 75.76, 55.74, 54.48, 53.42, 21.65. HRMS: calcd. for  $[\text{M}+\text{H}]^+$   $\text{C}_{20}\text{H}_{22}\text{N} = 276.17468$ , found: 276.17518;  $[\alpha]_D^{25} = -74.10$  ( $c = 1.0$  in  $\text{CHCl}_3$ ); HPLC conditions: CHIRALPAK IBN-5 column, hexane/ $\text{PrOH} = 99.9/0.1$ , flow rate =  $0.2 \text{ mL min}^{-1}$ ,  $\lambda = 254 \text{ nm}$ , major enantiomer:  $t_R = 18.3 \text{ min}$ ; minor enantiomer:  $t_R = 20.7 \text{ min}$ , 99% ee.

**(R)-3-(1-(allyl(benzyl)amino)prop-2-yn-1-yl)benzaldehyde**

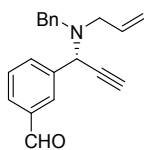

**3i**

**3i:** 17 h, 89% yield; slightly yellow liquid; According to procedure C; <sup>1</sup>H NMR (400 MHz, Chloroform-d) δ 9.95 (s, 1H), 8.09 (s, 1H), 7.84 (d, *J* = 7.8 Hz, 1H), 7.71 (d, *J* = 7.8 Hz, 1H), 7.43 (t, *J* = 7.6 Hz, 1H), 7.29 – 7.28 (m, 2H), 7.23 (t, *J* = 7.4 Hz, 2H), 7.18 – 7.14 (m, 1H), 5.81 – 5.71 (m, 1H), 5.22 (d, *J* = 17.2 Hz, 1H), 5.08 (d, *J* = 10.2 Hz, 1H), 4.78 (s, 1H), 3.71 (d, *J* = 13.6 Hz, 1H), 3.35 (d, *J* = 13.6 Hz, 1H), 3.10 – 3.05 (m, 1H), 2.93 (dd, *J* = 14.0, 8.4 Hz, 1H), 2.58 (d, *J* = 2.2 Hz, 1H). <sup>13</sup>C NMR (101 MHz, CDCl<sub>3</sub>) δ 192.45, 140.28, 139.19, 136.50, 136.15, 134.38, 129.63, 129.05, 128.97, 128.91, 128.50, 127.29, 118.04, 78.28, 76.76, 55.48, 54.66, 53.53. HRMS: calcd. for [M+H]<sup>+</sup> C<sub>20</sub>H<sub>20</sub>NO = 290.15394, found: 290.15421; [α]<sub>D</sub><sup>25</sup> = -75.87 (c = 1.0 in CHCl<sub>3</sub>); HPLC conditions: CHIRALPAK ADH column, hexane/<sup>i</sup>PrOH = 99/1, flow rate = 0.5 mL min<sup>-1</sup>, λ = 254 nm, minor enantiomer: t<sub>R</sub> = 14.3 min; major enantiomer: t<sub>R</sub> = 15.5 min, 97% ee.

**(R)-N-benzyl-N-(1-(*o*-tolyl)prop-2-yn-1-yl)prop-2-en-1-amine**

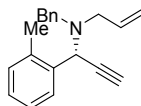

**3j**

**3j:** 3 h, 83% yield; slightly yellow liquid; According to procedure C; <sup>1</sup>H NMR (400 MHz, Chloroform-d) δ 7.75 – 7.73 (m, 1H), 7.24 – 7.18 (m, 5H), 7.17 – 7.11 (m, 3H), 5.88 – 5.77 (m, 1H), 5.24 (d, *J* = 17.2 Hz, 1H), 5.12 (d, *J* = 10.0 Hz, 1H), 4.94 (d, *J* = 2.2 Hz, 1H), 3.76 (d, *J* = 13.4 Hz, 1H), 3.29 (d, *J* = 13.4 Hz, 1H), 3.23 – 3.19 (m, 1H), 2.98 (dd, *J* = 13.6, 9.2 Hz, 1H), 2.59 (d, *J* = 2.2 Hz, 1H), 2.30 (s, 3H). <sup>13</sup>C NMR (101 MHz, CDCl<sub>3</sub>) δ 139.49, 137.69, 136.12, 136.02, 130.81, 129.58, 129.38, 128.17, 127.88, 126.99, 125.37, 118.11, 79.41, 76.12, 54.36, 54.28, 54.23, 19.45. HRMS: calcd. for [M+H]<sup>+</sup> C<sub>20</sub>H<sub>22</sub>N = 276.17468, found: 276.17468; [α]<sub>D</sub><sup>25</sup> = -194.67 (c = 1.0 in CHCl<sub>3</sub>); HPLC conditions: CHIRALPAK ADH column, hexane/<sup>i</sup>PrOH = 99.9/0.1, flow rate = 0.3 mL min<sup>-1</sup>, λ = 234 nm, minor enantiomer: t<sub>R</sub> = 13.0 min; major enantiomer: t<sub>R</sub> = 13.6 min, 95% ee.

**(R)-N-benzyl-N-(1-(2-iodophenyl)prop-2-yn-1-yl)prop-2-en-1-amine**

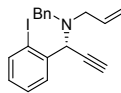

**3k**

**3k:** 3 h, 72% yield; slightly yellow liquid; According to procedure C; <sup>1</sup>H NMR (400 MHz, Chloroform-d) δ 7.86 (d, *J* = 7.8 Hz, 1H), 7.78 (d, *J* = 7.8 Hz, 1H), 7.31 – 7.15 (m, 6H), 6.94 (t, *J* = 7.6 Hz, 1H), 6.11 – 6.01 (m, 1H), 5.20 (d, *J* = 17.2 Hz, 1H), 5.10 (d, *J* = 10.0 Hz, 1H), 4.98 (d, *J* = 2.2 Hz, 1H), 3.66 (d, *J* = 13.6 Hz, 1H), 3.36 – 3.27 (m, 2H), 3.08 (dd, *J* = 13.6, 8.6 Hz, 1H), 2.65 (d, *J* = 2.2 Hz, 1H). <sup>13</sup>C NMR (101 MHz, CDCl<sub>3</sub>) δ 140.55, 140.14, 139.41, 135.93, 131.27, 129.60, 129.25, 128.11, 127.67, 126.87, 117.88, 100.64, 79.27, 76.81, 60.70, 55.14, 53.85. HRMS: calcd. for [M+H]<sup>+</sup> C<sub>19</sub>H<sub>19</sub>IN = 388.05567, found: 388.05653; [α]<sub>D</sub><sup>25</sup> = -96.10 (c = 1.0 in CHCl<sub>3</sub>); HPLC conditions: CHIRALPAK ADH column, hexane/<sup>i</sup>PrOH = 99.9/0.1, flow rate = 0.3 mL min<sup>-1</sup>, λ = 254 nm, major enantiomer: t<sub>R</sub> = 15.9 min; minor enantiomer: t<sub>R</sub> = 16.8 min, 95% ee.

**(R)-N-benzyl-N-(1-(3,4-dichlorophenyl)prop-2-yn-1-yl)prop-2-en-1-amine**

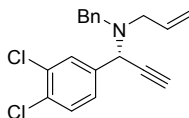

**3l**

**3l:** 5 h, 96% yield; slightly yellow liquid; According to procedure C; <sup>1</sup>H NMR (400 MHz, Chloroform-d) δ 7.65 (s, 1H), 7.39 (d, *J* = 8.4 Hz, 1H), 7.30 (d, *J* = 8.4 Hz, 1H), 7.27 – 7.20 (m, 4H), 7.17 – 7.13 (m, 1H), 5.78 – 5.68 (m, 1H), 5.20 (d, *J* = 17.4 Hz, 1H), 5.07 (d, *J* = 10.2 Hz, 1H), 4.64 (s, 1H), 3.68 (d, *J* = 13.6 Hz, 1H), 3.30 (d, *J* = 13.6 Hz, 1H), 3.07 – 3.02 (m, 1H), 2.88 (dd, *J* = 14.0, 8.6 Hz, 1H), 2.53 (d, *J* = 2.2 Hz, 1H). <sup>13</sup>C NMR (101 MHz,

CDCl<sub>3</sub>) δ 139.40, 139.05, 136.04, 132.35, 131.60, 130.17, 128.90, 128.53, 127.58, 127.34, 118.10, 78.00, 76.78, 54.96, 54.66, 53.47. HRMS: calcd. for [M+H]<sup>+</sup> C<sub>19</sub>H<sub>18</sub><sup>35</sup>Cl<sub>2</sub>N = 330.08108, found: 330.08130; [ $\alpha$ ]<sub>D</sub><sup>25</sup> = -22.83 (c = 1.0 in CHCl<sub>3</sub>); HPLC conditions: CHIRALPAK ODH column, hexane/<sup>i</sup>PrOH = 99.9/0.1, flow rate = 0.3 mL min<sup>-1</sup>, λ = 254 nm, major enantiomer: t<sub>R</sub> = 14.0 min; minor enantiomer: t<sub>R</sub> = 15.4 min, 97% ee.

**(R)-N-benzyl-N-(1-(thiophen-2-yl)prop-2-yn-1-yl)prop-2-en-1-amine**

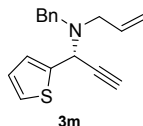

**3m:** 2 h, 91% yield; slightly yellow liquid; According to procedure C; <sup>1</sup>H NMR (400 MHz, Chloroform-d) δ 7.36 (d, *J* = 7.2 Hz, 2H), 7.24 (t, *J* = 7.6 Hz, 2H), 7.19 – 7.14 (m, 3H), 6.86 (dd, *J* = 5.2, 3.6 Hz, 1H), 5.84 – 5.74 (m, 1H), 5.25 (d, *J* = 17.6 Hz, 1H), 5.08 (d, *J* = 10.2 Hz, 1H), 4.86 (s, 1H), 3.82 (d, *J* = 13.8 Hz, 1H), 3.34 (d, *J* = 13.8 Hz, 1H), 3.22 – 3.17 (m, 1H), 2.92 (dd, *J* = 14.2, 8.2 Hz, 1H), 2.47 (d, *J* = 2.2 Hz, 1H). <sup>13</sup>C NMR (101 MHz, CDCl<sub>3</sub>) δ 144.44, 139.35, 136.22, 128.78, 128.45, 127.19, 126.39, 126.05, 125.64, 117.70, 78.88, 74.66, 54.48, 53.41, 52.36. HRMS: calcd. for [M+H]<sup>+</sup> C<sub>17</sub>H<sub>18</sub>NS = 268.11545, found: 268.11673; [ $\alpha$ ]<sub>D</sub><sup>25</sup> = -80.83 (c = 1.0 in CHCl<sub>3</sub>); HPLC conditions: CHIRALPAK ADH column, hexane/<sup>i</sup>PrOH = 99.9/0.1, flow rate = 0.3 mL min<sup>-1</sup>, λ = 254 nm, major enantiomer: t<sub>R</sub> = 16.3 min; minor enantiomer: t<sub>R</sub> = 17.1 min, 96% ee.

**(R)-N-benzyl-N-(1-(furan-2-yl)prop-2-yn-1-yl)prop-2-en-1-amine**

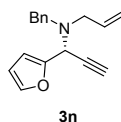

**3n:** 6 h, 48% yield; slightly yellow liquid; According to procedure C; <sup>1</sup>H NMR (400 MHz, Chloroform-d) δ 7.33 (s, 1H), 7.29 (d, *J* = 7.6 Hz, 1H), 7.22 (t, *J* = 7.6 Hz, 1H), 7.24 – 7.21 (m, 2H), 7.18 – 7.13 (m, 1H), 6.37 (d, *J* = 3.6 Hz, 1H), 6.25 – 6.24 (m, 1H), 5.82 – 5.72 (m, 1H), 5.22 (d, *J* = 17.2 Hz, 1H), 5.07 (d, *J* = 10.2 Hz, 1H), 4.78 (s, 1H), 3.71 (d, *J* = 13.8 Hz, 1H), 3.41 (d, *J* = 13.8 Hz, 1H), 3.16 – 3.12 (m, 1H), 3.00 (dd, *J* = 14.0, 7.8 Hz, 1H), 2.39 (d, *J* = 2.4 Hz, 1H). <sup>13</sup>C NMR (101 MHz, CDCl<sub>3</sub>) δ 151.88, 142.72, 139.35, 136.13, 128.90, 128.41, 127.11, 117.84, 110.24, 109.22, 78.09, 74.00, 54.58, 53.77, 50.71. HRMS: calcd. for [M+H]<sup>+</sup> C<sub>17</sub>H<sub>18</sub>NO = 252.13829, found: 252.13921; [ $\alpha$ ]<sub>D</sub><sup>25</sup> = -42.60 (c = 1.0 in CHCl<sub>3</sub>); HPLC conditions: CHIRALPAK IC column, hexane/<sup>i</sup>PrOH = 99.9/0.1, flow rate = 0.5 mL min<sup>-1</sup>, λ = 234 nm, major enantiomer: t<sub>R</sub> = 8.2 min; minor enantiomer: t<sub>R</sub> = 9.0 min, 94% ee.

**(S)-N-allyl-N-benzylbut-3-yn-2-amine**

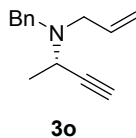

**3o:** 21 h, 77% yield; slightly yellow liquid; According to procedure C, at -40 °C; <sup>1</sup>H NMR (400 MHz, Chloroform-d) δ 7.36 (d, *J* = 7.4 Hz, 2H), 7.30 (t, *J* = 7.4 Hz, 2H), 7.24 – 7.21 (m, 1H), 5.88 – 5.78 (m, 1H), 5.25 (d, *J* = 17.4 Hz, 1H), 5.11 (d, *J* = 10.0 Hz, 1H), 3.84 (d, *J* = 14.0 Hz, 1H), 3.65 (q, *J* = 8.0, 7.0 Hz, 1H), 3.37 (d, *J* = 14.0 Hz, 1H), 3.27 – 3.23 (m, 1H), 2.95 (dd, *J* = 14.2, 7.8 Hz, 1H), 2.26 (d, *J* = 2.2 Hz, 1H), 1.33 (d, *J* = 7.0 Hz, 3H). <sup>13</sup>C NMR (101 MHz, CDCl<sub>3</sub>) δ 139.98, 136.76, 128.82, 128.34, 126.96, 117.27, 83.03, 72.06, 54.62, 53.81, 46.98, 20.14. HRMS: calcd. for [M+H]<sup>+</sup> C<sub>14</sub>H<sub>18</sub>N = 200.14338, found: 200.14322; [ $\alpha$ ]<sub>D</sub><sup>25</sup> = -109.67 (c = 1.0 in CHCl<sub>3</sub>); HPLC conditions: CHIRALPAK IBN-5 column, hexane/<sup>i</sup>PrOH = 99.9/0.1, flow rate = 0.2 mL min<sup>-1</sup>, λ = 254 nm, major enantiomer: t<sub>R</sub> = 21.8 min; minor enantiomer: t<sub>R</sub> = 23.8 min, 86% ee.

**(S)-N-allyl-N-benzylpent-1-yn-3-amine**

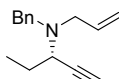

**3p**

**3p:** 21 h, 77% yield; slightly yellow liquid; According to procedure C;  $^1\text{H NMR}$  (400 MHz, Chloroform- $d$ )  $\delta$  7.36 (d,  $J = 7.4$  Hz, 2H), 7.29 (t,  $J = 7.4$  Hz, 2H), 7.24 – 7.20 (m, 1H), 5.87 – 5.77 (m, 1H), 5.24 (d,  $J = 17.2$  Hz, 1H), 5.10 (d,  $J = 10.2$  Hz, 1H), 3.85 (d,  $J = 14.0$  Hz, 1H), 3.38 – 3.34 (m, 2H), 3.26 – 3.22 (m, 1H), 2.93 (dd,  $J = 14.2$ , 8.2 Hz, 1H), 2.26 (d,  $J = 2.2$  Hz, 1H), 1.70 – 1.63 (m, 2H), 0.96 (t,  $J = 7.2$  Hz, 3H).  $^{13}\text{C NMR}$  (101 MHz,  $\text{CDCl}_3$ )  $\delta$  140.05, 136.84, 128.81, 128.31, 126.92, 117.17, 82.31, 72.50, 54.78, 53.91, 53.83, 27.08, 11.27. HRMS: calcd. for  $[\text{M}+\text{H}]^+$   $\text{C}_{15}\text{H}_{20}\text{N} = 214.15903$ , found: 214.15903;  $[\alpha]_D^{25} = -18.60$  ( $c = 1.0$  in  $\text{CHCl}_3$ ); HPLC conditions: CHIRALPAK IBN-5 column, hexane/ $i$ PrOH = 99.9/0.1, flow rate = 0.2  $\text{mL min}^{-1}$ ,  $\lambda = 254$  nm, major enantiomer:  $t_R = 20.1$  min; minor enantiomer:  $t_R = 21.0$  min, 93% ee.

**(S)-N-allyl-N-benzylhex-1-yn-3-amine**

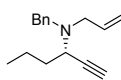

**3q**

**3q:** 19 h, 72% yield; slightly yellow liquid; According to procedure C;  $^1\text{H NMR}$  (400 MHz, Chloroform- $d$ )  $\delta$  7.35 (d,  $J = 7.2$  Hz, 2H), 7.29 (t,  $J = 7.4$  Hz, 2H), 7.22 (t,  $J = 7.2$  Hz, 1H), 5.87 – 5.77 (m, 1H), 5.24 (d,  $J = 17.2$  Hz, 1H), 5.10 (d,  $J = 10.2$  Hz, 1H), 3.85 (d,  $J = 13.8$  Hz, 1H), 3.48 (td,  $J = 7.6$ , 2.2 Hz, 1H), 3.35 (d,  $J = 13.8$  Hz, 1H), 3.27 – 3.21 (m, 1H), 2.93 (dd,  $J = 14.2$ , 8.2 Hz, 1H), 2.25 (d,  $J = 2.2$  Hz, 1H), 1.69 – 1.56 (m, 2H), 1.48 – 1.38 (m, 2H), 0.86 (t,  $J = 7.2$  Hz, 3H).  $^{13}\text{C NMR}$  (101 MHz,  $\text{CDCl}_3$ )  $\delta$  140.06, 136.86, 128.86, 128.32, 126.93, 117.16, 82.51, 72.36, 54.82, 53.93, 51.79, 36.06, 19.70, 13.84. HRMS: calcd. for  $[\text{M}+\text{H}]^+$   $\text{C}_{16}\text{H}_{22}\text{N} = 228.17468$ , found: 228.17486;  $[\alpha]_D^{25} = -128.63$  ( $c = 1.0$  in  $\text{CHCl}_3$ ); HPLC conditions: CHIRALPAK ODH column, hexane/ $i$ PrOH = 99.9/0.1, flow rate = 0.5  $\text{mL min}^{-1}$ ,  $\lambda = 254$  nm, major enantiomer:  $t_R = 7.5$  min; minor enantiomer:  $t_R = 7.7$  min, 95% ee.

**(S)-N-allyl-N-benzyl-5-phenylpent-1-yn-3-amine**

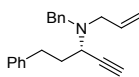

**3r**

**3r:** 8 h, 79% yield; slightly yellow liquid; According to procedure C;  $^1\text{H NMR}$  (400 MHz, Chloroform- $d$ )  $\delta$  7.28 (d,  $J = 7.6$  Hz, 2H), 7.22 (t,  $J = 7.4$  Hz, 2H), 7.17 – 7.14 (m, 3H), 7.09 – 7.03 (m, 3H), 5.79 – 5.69 (m, 1H), 5.15 (d,  $J = 17.2$  Hz, 1H), 5.02 (d,  $J = 10.2$  Hz, 1H), 3.80 (d,  $J = 13.8$  Hz, 1H), 3.43 (t,  $J = 7.8$  Hz, 1H), 3.31 (d,  $J = 13.8$  Hz, 1H), 3.20 (d,  $J = 13.8$  Hz, 1H), 2.88 (dd,  $J = 14.2$ , 7.8 Hz, 1H), 2.72 – 2.57 (m, 2H), 2.22 (s, 1H), 1.97 – 1.81 (m, 2H).  $^{13}\text{C NMR}$  (101 MHz,  $\text{CDCl}_3$ )  $\delta$  141.86, 139.83, 136.64, 128.94, 128.58, 128.44, 128.38, 127.01, 125.94, 117.32, 82.09, 72.89, 54.94, 54.10, 51.78, 35.69, 32.70. HRMS: calcd. for  $[\text{M}+\text{H}]^+$   $\text{C}_{21}\text{H}_{24}\text{N} = 290.19033$ , found: 290.19051;  $[\alpha]_D^{25} = -147.7$  ( $c = 1.0$  in  $\text{CHCl}_3$ ); HPLC conditions: CHIRALPAK ODH column, hexane/ $i$ PrOH = 99.9/0.1, flow rate = 0.3  $\text{mL min}^{-1}$ ,  $\lambda = 254$  nm, minor enantiomer:  $t_R = 20.8$  min; major enantiomer:  $t_R = 21.6$  min, 92% ee.

**(S)-N-allyl-N-benzyl-5-methylhex-1-yn-3-amine**

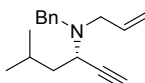

**3s**

**3s:** 16 h, 72% yield; slightly yellow liquid; According to procedure C;  $^1\text{H NMR}$  (400 MHz, Chloroform- $d$ )  $\delta$  7.35 (d,  $J = 7.6$  Hz, 2H), 7.30 (t,  $J = 7.2$  Hz, 2H), 7.26 – 7.21 (m, 1H), 5.87 – 5.77 (m, 1H), 5.24 (d,  $J = 17.2$  Hz, 1H),

5.11 (d,  $J = 10.2$  Hz, 1H), 3.85 (d,  $J = 13.8$  Hz, 1H), 3.56 (t,  $J = 7.8$  Hz, 1H), 3.34 (d,  $J = 13.8$  Hz, 1H), 3.23 (d,  $J = 14.2$  Hz, 1H), 2.92 (dd,  $J = 14.2, 8.2$  Hz, 1H), 2.25 (s, 1H), 1.87 – 1.81 (m, 1H), 1.63 – 1.56 (m, 1H), 1.50 – 1.43 (m, 1H), 0.84 (d,  $J = 6.6$  Hz, 3H), 0.80 (d,  $J = 6.6$  Hz, 3H).  $^{13}\text{C}$  NMR (101 MHz,  $\text{CDCl}_3$ )  $\delta$  139.99, 136.82, 128.93, 128.31, 126.95, 117.27, 82.61, 72.30, 54.77, 53.99, 50.04, 42.88, 24.78, 22.78, 22.30. HRMS: calcd. for  $[\text{M}+\text{H}]^+$   $\text{C}_{17}\text{H}_{24}\text{N} = 242.19033$ , found: 242.19053;  $[\alpha]_D^{25} = -113.93$  ( $c = 1.0$  in  $\text{CHCl}_3$ ); *rac*-**3s** can't be separated by chiral columns. The ee was determined by checking the ee of the click reaction product **17**.

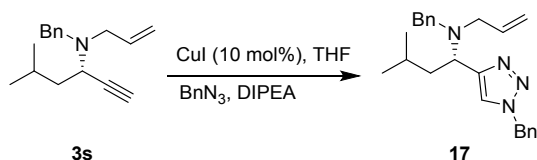

### (*S*)-*N*-allyl-*N*-benzyl-1-(1-benzyl-1*H*-1,2,3-triazol-4-yl)-3-methylbutan-1-amine

In a schlenk tube, **3s** (0.1 mmol, 1.0 equiv.), CuI (10 mol%), and anhydrous THF (0.5 mL) were added under nitrogen atmosphere. Diisopropylethylamine (2.0 equiv.) and a solution of benzyl azide (1.1 equiv.) in THF (0.5 mL) were added to the solution and the mixture was stirred for 16 h at room temperature. Then the mixture was purified by silica gel column chromatography (petroleum ether/ethyl acetate = 10/1) to provide the desired product **17**.

**17**: 16 h, 83% yield; slightly yellow liquid;  $^1\text{H}$  NMR (400 MHz, Chloroform- $d$ )  $\delta$  7.39 – 7.20 (m, 11H), 5.86 – 5.76 (m, 1H), 5.55 (s, 2H), 5.16 (d,  $J = 17.2$  Hz, 1H), 5.08 (d,  $J = 10.2$  Hz, 1H), 4.04 (t,  $J = 7.6$  Hz, 1H), 3.84 (d,  $J = 14.0$  Hz, 1H), 3.23 (dd,  $J = 14.2, 4.6$  Hz, 1H), 3.15 (d,  $J = 14.0$  Hz, 1H), 2.72 (dd,  $J = 14.2, 7.8$  Hz, 1H), 1.94 – 1.84 (m, 1H), 1.83 – 1.72 (m, 1H), 1.62 – 1.55 (m, 1H), 0.85 (d,  $J = 6.6$  Hz, 3H), 0.78 (d,  $J = 6.6$  Hz, 3H).  $^{13}\text{C}$  NMR (101 MHz,  $\text{CDCl}_3$ )  $\delta$  147.46, 140.49, 137.40, 135.13, 129.19, 128.85, 128.73, 128.22, 127.92, 126.74, 121.83, 116.91, 54.08, 53.31, 52.40, 40.83, 24.77, 23.17, 22.28. HRMS: calcd. for  $[\text{M}+\text{H}]^+$   $\text{C}_{24}\text{H}_{31}\text{N}_4 = 375.25430$ , found: 375.25490;  $[\alpha]_D^{25} = -45.23$  ( $c = 1.0$  in  $\text{CHCl}_3$ ); HPLC conditions: CHIRALPAK ADH column, hexane/ $i$ PrOH = 90/10, flow rate = 0.5 mL  $\text{min}^{-1}$ ,  $\lambda = 214$  nm, major enantiomer:  $t_R = 14.1$  min; minor enantiomer:  $t_R = 15.1$  min, 88% ee.

### (*S*, *Z*)-*N*-allyl-*N*-benzyl-6-en-1-yn-3-amine

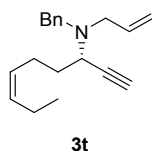

**3t**: 5 h, 91% yield; slightly yellow liquid; According to procedure C;  $^1\text{H}$  NMR (400 MHz, Chloroform- $d$ )  $\delta$  7.35 (d,  $J = 7.4$  Hz, 2H), 7.29 (t,  $J = 7.4$  Hz, 2H), 7.24 – 7.20 (m, 1H), 5.86 – 5.77 (m, 1H), 5.38 – 5.31 (m, 1H), 5.28 – 5.22 (m, 2H), 5.10 (d,  $J = 10.2$  Hz, 1H), 3.85 (d,  $J = 13.8$  Hz, 1H), 3.49 (t,  $J = 7.6$  Hz, 1H), 3.36 (d,  $J = 13.8$  Hz, 1H), 3.26 – 3.22 (m, 1H), 2.94 (dd,  $J = 14.2, 8.2$  Hz, 1H), 2.26 (s, 1H), 2.23 – 2.12 (m, 1H), 2.14 – 1.99 (m, 3H), 1.73 – 1.66 (m, 2H), 0.94 (t,  $J = 7.6$  Hz, 3H).  $^{13}\text{C}$  NMR (101 MHz,  $\text{CDCl}_3$ )  $\delta$  139.92, 136.70, 132.57, 128.84, 128.31, 128.11, 126.94, 117.26, 82.20, 72.64, 54.80, 54.08, 51.75, 34.03, 24.14, 20.67, 14.49. HRMS: calcd. for  $[\text{M}+\text{H}]^+$   $\text{C}_{19}\text{H}_{26}\text{N} = 268.20598$ , found: 268.20614;  $[\alpha]_D^{25} = -27.87$  ( $c = 1.0$  in  $\text{CHCl}_3$ ); HPLC conditions: CHIRALPAK IBN-5 column, hexane/ $i$ PrOH = 99.9/0.1, flow rate = 0.3 mL  $\text{min}^{-1}$ ,  $\lambda = 234$  nm, major enantiomer:  $t_R = 12.6$  min; minor enantiomer:  $t_R = 13.1$  min, 95% ee.

### (*S*)-*N*-allyl-*N*-benzyl-5-methylhex-4-en-1-yn-3-amine

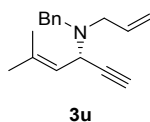

**3u**: 4 h, 95% yield; slightly yellow liquid; According to procedure C;  $^1\text{H}$  NMR (400 MHz, Chloroform- $d$ )  $\delta$  7.27 (d,  $J = 7.4$  Hz, 2H), 7.21 (t,  $J = 7.4$  Hz, 2H), 7.16 – 7.13 (m, 1H), 5.82 – 5.72 (m, 1H), 5.24 (d,  $J = 7.8$  Hz, 1H), 5.17 (d,  $J = 17.0$  Hz, 1H), 5.05 (d,  $J = 10.2$  Hz, 1H), 4.16 (d,  $J = 8.0$  Hz, 1H), 3.73 (d,  $J = 13.6$  Hz, 1H), 3.38 (d,  $J = 13.6$  Hz, 1H), 3.15 (dd,  $J = 14.0, 4.8$  Hz, 1H), 2.97 (dd,  $J = 14.0, 7.8$  Hz, 1H), 2.23 (d,  $J = 2.2$  Hz, 1H), 1.64 (s, 3H), 1.49 (s, 3H).  $^{13}\text{C}$  NMR (101 MHz,  $\text{CDCl}_3$ )  $\delta$  139.83, 137.01, 136.61, 129.03, 128.26, 126.97, 122.02, 117.54, 82.18, 72.30, 54.66, 53.74, 49.77, 25.94, 18.38. HRMS: calcd. for  $[\text{M}+\text{H}]^+$   $\text{C}_{17}\text{H}_{22}\text{N} = 240.17468$ , found: 240.17553;  $[\alpha]_{\text{D}}^{25} = -44.90$  ( $c = 1.0$  in  $\text{CHCl}_3$ ); HPLC conditions: CHIRALPAK IBN-5 column, hexane/ $(\text{CH}_2\text{Cl}_2/\text{EtOH} = 100/2) = 99/1$ , flow rate =  $0.5 \text{ mL min}^{-1}$ ,  $\lambda = 254 \text{ nm}$ , major enantiomer:  $t_{\text{R}} = 9.5 \text{ min}$ ; minor enantiomer:  $t_{\text{R}} = 10.4 \text{ min}$ , 79% ee.

**(R)-N-allyl-N-benzyl-1-(benzyloxy)but-3-yn-2-amine**

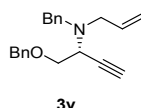

**3v**: 17 h, 97% yield; slightly yellow liquid; According to procedure C;  $^1\text{H}$  NMR (400 MHz, Chloroform- $d$ )  $\delta$  7.36 (d,  $J = 7.2$  Hz, 2H), 7.32 – 7.20 (m, 8H), 5.88 – 5.78 (m, 1H), 5.28 – 5.23 (m, 1H), 5.12 (d,  $J = 10.0$  Hz, 1H), 4.52 (s, 2H), 3.88 – 3.83 (m, 2H), 3.66 – 3.56 (m, 2H), 3.44 (d,  $J = 14.0$  Hz, 1H), 3.30 – 3.25 (m, 1H), 3.02 (dd,  $J = 14.2, 7.8$  Hz, 1H), 2.32 (d,  $J = 2.2$  Hz, 1H).  $^{13}\text{C}$  NMR (101 MHz,  $\text{CDCl}_3$ )  $\delta$  139.62, 138.23, 136.38, 128.84, 128.46, 128.34, 127.74, 127.69, 127.05, 117.57, 80.02, 73.66, 73.16, 71.53, 55.36, 54.76, 52.47. HRMS: calcd. for  $[\text{M}+\text{H}]^+$   $\text{C}_{21}\text{H}_{24}\text{NO} = 306.18524$ , found: 306.18609;  $[\alpha]_{\text{D}}^{25} = -71.53$  ( $c = 1.0$  in  $\text{CHCl}_3$ ); HPLC conditions: CHIRALPAK ODH column, hexane/ $\text{PrOH} = 99/1$ , flow rate =  $0.2 \text{ mL min}^{-1}$ ,  $\lambda = 234 \text{ nm}$ , major enantiomer:  $t_{\text{R}} = 26.4 \text{ min}$ ; minor enantiomer:  $t_{\text{R}} = 28.1 \text{ min}$ , 92% ee.

**(S)-N-allyl-N-benzyl-5-(methylthio)pent-1-yn-3-amine**

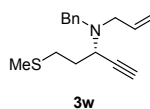

**3w**: 18 h, 77% yield; slightly yellow liquid; According to procedure C;  $^1\text{H}$  NMR (400 MHz, Chloroform- $d$ )  $\delta$  7.34 – 7.28 (m, 4H), 7.25 – 7.21 (m, 1H), 5.87 – 5.77 (m, 1H), 5.25 (d,  $J = 17.2$  Hz, 1H), 5.12 (d,  $J = 10.2$  Hz, 1H), 3.85 (d,  $J = 13.8$  Hz, 1H), 3.67 – 3.63 (m, 1H), 3.37 (d,  $J = 13.8$  Hz, 1H), 3.28 – 3.22 (m, 1H), 2.95 (dd,  $J = 14.2, 8.0$  Hz, 1H), 2.64 – 2.52 (m, 2H), 2.29 (d,  $J = 2.2$  Hz, 1H), 2.04 (s, 3H), 2.01 – 1.84 (m, 2H).  $^{13}\text{C}$  NMR (101 MHz,  $\text{CDCl}_3$ )  $\delta$  139.65, 136.51, 128.82, 128.37, 127.05, 117.43, 81.56, 73.08, 54.91, 54.06, 51.15, 33.35, 30.98, 15.52. HRMS: calcd. for  $[\text{M}+\text{H}]^+$   $\text{C}_{16}\text{H}_{22}\text{NS} = 260.14675$ , found: 260.14630;  $[\alpha]_{\text{D}}^{25} = -73.13$  ( $c = 1.0$  in  $\text{CHCl}_3$ ); HPLC conditions: CHIRALPAK IC column, hexane/ $\text{PrOH} = 99.9/0.1$ , flow rate =  $0.5 \text{ mL min}^{-1}$ ,  $\lambda = 254 \text{ nm}$ , major enantiomer:  $t_{\text{R}} = 9.8 \text{ min}$ ; minor enantiomer:  $t_{\text{R}} = 10.6 \text{ min}$ , 93% ee.

**(S)-N-allyl-N-benzyl-4-methylpent-1-yn-3-amine**

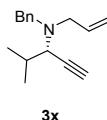

**3x**: 16 h, 70% yield; slightly yellow liquid; According to procedure C;  $^1\text{H}$  NMR (400 MHz, Chloroform- $d$ )  $\delta$  7.36 (d,  $J = 7.2$  Hz, 2H), 7.29 (t,  $J = 7.4$  Hz, 2H), 7.24 – 7.20 (m, 1H), 5.87 – 5.77 (m, 1H), 5.24 (d,  $J = 17.2$  Hz, 1H), 5.10 (d,  $J = 10.2$  Hz, 1H), 3.85 (d,  $J = 13.8$  Hz, 1H), 3.33 (d,  $J = 13.8$  Hz, 1H), 3.25 – 3.20 (m, 1H), 2.97 (dd,  $J = 10.4, 2.2$  Hz, 1H), 2.89 (dd,  $J = 14.2, 8.4$  Hz, 1H), 2.28 (d,  $J = 2.2$  Hz, 1H), 1.90 – 1.80 (m, 1H), 1.01 (d,  $J = 6.6$  Hz, 3H), 0.98 (d,  $J = 6.6$  Hz, 3H).  $^{13}\text{C}$  NMR (101 MHz,  $\text{CDCl}_3$ )  $\delta$  140.01, 136.90, 128.87, 128.31, 126.91, 117.12, 81.62, 73.07, 59.36, 55.02, 53.87, 30.93, 20.82, 20.00. HRMS: calcd. for  $[\text{M}+\text{H}]^+$   $\text{C}_{16}\text{H}_{22}\text{N} = 228.17468$ , found: 228.17505;  $[\alpha]_{\text{D}}^{25} = -160.30$  ( $c = 1.0$  in  $\text{CHCl}_3$ ); HPLC conditions: CHIRALPAK ADH column, hexane/ $\text{PrOH} =$

99.9/0.1, flow rate = 0.2 mL min<sup>-1</sup>,  $\lambda$  = 234 nm, minor enantiomer:  $t_R$  = 17.0 min; major enantiomer:  $t_R$  = 17.7 min, 92% ee.

**(S)-N-benzyl-N-(1-cyclohexylprop-2-yn-1-yl)prop-2-en-1-amine**

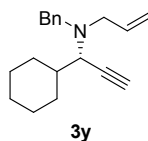

**3y**: 5 h, 76% yield; slightly yellow liquid; According to procedure C; <sup>1</sup>H NMR (400 MHz, Chloroform-d)  $\delta$  7.35 (d,  $J$  = 7.4 Hz, 2H), 7.29 (t,  $J$  = 7.4 Hz, 2H), 7.24 – 7.20 (m, 1H), 5.86 – 5.76 (m, 1H), 5.24 (d,  $J$  = 17.0 Hz, 1H), 5.10 (d,  $J$  = 10.2 Hz, 1H), 3.85 (d,  $J$  = 14.0 Hz, 1H), 3.33 (d,  $J$  = 14.0 Hz, 1H), 3.22 (d,  $J$  = 14.2 Hz, 1H), 3.11 – 3.08 (m, 1H), 2.89 (dd,  $J$  = 14.2, 8.4 Hz, 1H), 2.27 (d,  $J$  = 2.2 Hz, 1H), 2.18 (d,  $J$  = 12.8 Hz, 1H), 2.01 (d,  $J$  = 13.4 Hz, 1H), 1.72 – 1.51 (m, 4H), 1.28 – 1.05 (m, 3H), 0.92 – 0.72 (m, 2H). <sup>13</sup>C NMR (101 MHz, CDCl<sub>3</sub>)  $\delta$  140.02, 136.94, 128.83, 128.30, 126.88, 117.09, 81.39, 73.20, 57.96, 54.91, 53.76, 39.86, 31.28, 30.36, 26.75, 26.24, 26.03. HRMS: calcd. for [M+H]<sup>+</sup> C<sub>19</sub>H<sub>26</sub>N = 268.20598, found: 268.20602;  $[\alpha]_D^{25}$  = -98.23 (c = 1.0 in CHCl<sub>3</sub>); *rac*-**3y** can't be separated by chiral columns. The ee was determined by checking the ee of the click reaction product **18**.

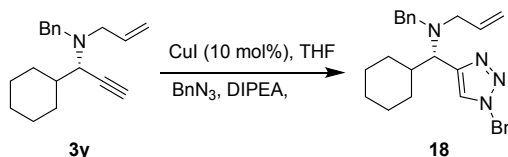

**(S)-N-benzyl-N-((1-benzyl-1H-1,2,3-triazol-4-yl)(cyclohexyl)methyl)prop-2-en-1-amine**

In a schlenk tube, **3y** (0.1 mmol, 1.0 equiv.), CuI (10 mol%), and anhydrous THF (0.5 mL) were added under nitrogen atmosphere. Diisopropylethylamine (2.0 equiv.) and a solution of benzyl azide (1.1 equiv.) in THF (0.5 mL) were added to the solution and the mixture was stirred for 17 h at room temperature. Then the mixture was purified by silica gel column chromatography (petroleum ether/ethyl acetate = 10/1) to provide the desired product **18**.

**18**: 17 h, 68% yield; slightly yellow liquid; <sup>1</sup>H NMR (400 MHz, Chloroform-d)  $\delta$  7.41 – 7.16 (m, 10H), 5.87 – 5.77 (m, 1H), 5.56 (s, 2H), 5.16 – 5.06 (m, 2H), 3.93 (d,  $J$  = 14.2 Hz, 1H), 3.52 (d,  $J$  = 10.8 Hz, 1H), 3.35 (d,  $J$  = 10.8 Hz, 1H), 2.94 (d,  $J$  = 14.2 Hz, 1H), 2.54 – 2.48 (m, 1H), 2.38 – 2.35 (m, 1H), 2.12 – 2.04 (m, 1H), 1.80 – 1.72 (m, 1H), 1.62 – 1.53 (m, 2H), 1.26 – 1.12 (m, 4H), 0.97 – 0.83 (m, 2H), 0.70 – 0.60 (m, 1H). <sup>13</sup>C NMR (101 MHz, CDCl<sub>3</sub>)  $\delta$  144.77, 140.40, 137.48, 135.21, 129.19, 128.69, 128.26, 127.79, 126.68, 122.52, 116.68, 60.07, 54.18, 53.99, 53.03, 38.44, 31.34, 30.74, 26.81, 26.22, 26.18. HRMS: calcd. for [M+H]<sup>+</sup> C<sub>26</sub>H<sub>33</sub>N<sub>4</sub> = 401.26997, found: 401.26980;  $[\alpha]_D^{25}$  = -35.23 (c = 1.0 in CHCl<sub>3</sub>); HPLC conditions: CHIRALPAK ADH column, hexane/PrOH = 90/10, flow rate = 1 mL min<sup>-1</sup>,  $\lambda$  = 210 nm, minor enantiomer:  $t_R$  = 14.0 min; major enantiomer:  $t_R$  = 28.2 min, 97% ee.

**(R, E)-N-benzyl-3-phenyl-N-(1-phenylprop-2-yn-1-yl)prop-2-en-1-amine**

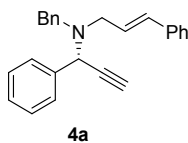

**4a**: 19 h, 49% yield; slightly yellow liquid; According to procedure C; <sup>1</sup>H NMR (400 MHz, Chloroform-d)  $\delta$  7.60 (d,  $J$  = 7.6 Hz, 2H), 7.33 – 7.11 (m, 13H), 6.53 (d,  $J$  = 15.8 Hz, 1H), 6.18 – 6.10 (m, 1H), 4.79 (s, 1H), 3.76 (d,  $J$  = 13.6 Hz, 1H), 3.38 (d,  $J$  = 13.6 Hz, 1H), 3.27 – 3.22 (m, 1H), 3.09 (dd,  $J$  = 14.0, 8.6 Hz, 1H), 2.54 (d,  $J$  = 2.2 Hz, 1H). <sup>13</sup>C NMR (101 MHz, CDCl<sub>3</sub>)  $\delta$  139.62, 138.77, 137.26, 132.72, 128.96, 128.63, 128.42, 128.27, 128.26, 128.22, 127.65, 127.48, 127.13, 126.43, 79.23, 76.03, 55.99, 54.72, 52.91. HRMS: calcd. for [M+H]<sup>+</sup> C<sub>25</sub>H<sub>24</sub>N =



338.19033, found: 338.19223;  $[\alpha]_D^{25} = -1.83$  ( $c = 1.0$  in  $\text{CHCl}_3$ ); HPLC conditions: CHIRALPAK ODH column, hexane/ $i$ -PrOH = 99.9/0.1, flow rate = 0.3 mL  $\text{min}^{-1}$ ,  $\lambda = 254$  nm, major enantiomer:  $t_R = 18.3$  min; minor enantiomer:  $t_R = 22.6$  min, 91% ee.

**Methyl (*R, E*)-4-(benzyl(1-phenylprop-2-yn-1-yl)amino)but-2-enoate**

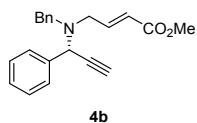

**4b:** 1 h, 50% yield; slightly yellow liquid; According to procedure C;  $^1\text{H}$  NMR (400 MHz, Chloroform- $d$ )  $\delta$  7.55 (d,  $J = 7.4$  Hz, 2H), 7.31 (d,  $J = 7.3$  Hz, 2H), 7.27 – 7.21 (m, 4H), 7.19 – 7.13 (m, 2H), 6.89 – 6.80 (m, 1H), 6.02 (d,  $J = 15.8$  Hz, 1H), 4.66 (s, 1H), 3.69 (d,  $J = 13.6$  Hz, 1H), 3.63 (s, 3H), 3.41 (d,  $J = 13.6$  Hz, 1H), 3.21 – 3.15 (m, 1H), 3.10 (dd,  $J = 16.0, 7.4$  Hz, 1H), 2.52 (d,  $J = 2.2$  Hz, 1H).  $^{13}\text{C}$  NMR (101 MHz,  $\text{CDCl}_3$ )  $\delta$  166.83, 147.05, 138.77, 138.10, 128.91, 128.54, 128.33, 128.12, 127.85, 127.40, 122.41, 78.66, 76.36, 56.17, 55.27, 51.63, 51.29. HRMS: calcd. for  $[\text{M}+\text{H}]^+$   $\text{C}_{21}\text{H}_{22}\text{NO}_2 = 320.16451$ , found: 320.16432;  $[\alpha]_D^{25} = -0.50$  ( $c = 1.0$  in  $\text{CHCl}_3$ ); HPLC conditions: CHIRALPAK IBN-5 column, hexane/ $i$ -PrOH = 99/1, flow rate = 0.5 mL  $\text{min}^{-1}$ ,  $\lambda = 234$  nm, minor enantiomer:  $t_R = 21.5$  min; major enantiomer:  $t_R = 23.9$  min, 96% ee.

**(*R*)-*N*-benzyl-2-methyl-*N*-(1-phenylprop-2-yn-1-yl)prop-2-en-1-amine**

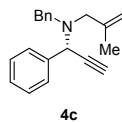

**4c:** 2 h, 77% yield; slightly yellow liquid; According to procedure C;  $^1\text{H}$  NMR (400 MHz, Chloroform- $d$ )  $\delta$  7.65 (d,  $J = 8.2$  Hz, 2H), 7.38 (d,  $J = 7.2$  Hz, 2H), 7.35 – 7.27 (m, 4H), 7.25 – 7.20 (m, 2H), 5.04 (s, 1H), 4.88 (s, 1H), 4.78 (s, 1H), 3.76 (d,  $J = 13.6$  Hz, 1H), 3.36 (d,  $J = 13.6$  Hz, 1H), 3.01 – 2.94 (m, 2H), 2.58 (d,  $J = 2.2$  Hz, 1H), 1.73 (s, 3H).  $^{13}\text{C}$  NMR (101 MHz,  $\text{CDCl}_3$ )  $\delta$  143.30, 139.65, 138.75, 128.94, 128.41, 128.26, 128.19, 127.57, 127.09, 113.63, 78.96, 75.98, 56.96, 55.47, 54.41, 20.87. HRMS: calcd. for  $[\text{M}+\text{H}]^+$   $\text{C}_{20}\text{H}_{22}\text{N} = 276.17468$ , found: 276.17570;  $[\alpha]_D^{25} = -104.87$  ( $c = 1.0$  in  $\text{CHCl}_3$ ); HPLC conditions: CHIRALPAK ODH column, hexane/ $i$ -PrOH = 99.9/0.1, flow rate = 0.3 mL  $\text{min}^{-1}$ ,  $\lambda = 254$  nm, major enantiomer:  $t_R = 15.1$  min; minor enantiomer:  $t_R = 20.4$  min, 99% ee.

**(*R*)-*N*-benzyl-2-iodo-*N*-(1-phenylprop-2-yn-1-yl)prop-2-en-1-amine**

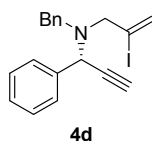

**4d:** 3 h, 78% yield; slightly yellow liquid; According to procedure C;  $^1\text{H}$  NMR (600 MHz, Chloroform- $d$ )  $\delta$  7.67 (d,  $J = 7.6$  Hz, 2H), 7.38 (d,  $J = 7.6$  Hz, 2H), 7.27 – 7.19 (m, 4H), 7.19 – 7.11 (m, 2H), 6.36 (s, 1H), 5.82 (s, 1H), 4.71 (s, 1H), 3.69 (d,  $J = 13.6$  Hz, 1H), 3.30 (d,  $J = 13.6$  Hz, 1H), 3.15 (d,  $J = 14.2$  Hz, 1H), 2.99 (d,  $J = 14.2$  Hz, 1H), 2.50 (d,  $J = 2.2$  Hz, 1H).  $^{13}\text{C}$  NMR (151 MHz,  $\text{CDCl}_3$ )  $\delta$  138.60, 137.69, 129.22, 128.58, 128.43, 128.22, 127.85, 127.35, 110.87, 78.55, 76.35, 61.41, 55.14, 53.89. HRMS: calcd. for  $[\text{M}+\text{H}]^+$   $\text{C}_{19}\text{H}_{19}\text{IN} = 388.05567$ , found: 388.05531;  $[\alpha]_D^{25} = -109.37$  ( $c = 1.0$  in  $\text{CHCl}_3$ ); HPLC conditions: CHIRALPAK ODH column, hexane/ $i$ -PrOH = 99.9/0.1, flow rate = 0.3 mL  $\text{min}^{-1}$ ,  $\lambda = 254$  nm, major enantiomer:  $t_R = 13.8$  min; minor enantiomer:  $t_R = 15.2$  min, 97% ee.

**(*R*)-2-(((4-chlorobenzyl)(1-phenylprop-2-yn-1-yl)amino)methyl)prop-2-en-1-ol**

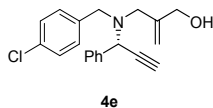

**4e**: 48 h, 81% yield; slightly yellow liquid; According to procedure C, with 10 mol% catalyst, **1a** (0.3 mmol, 1.5 equiv.), **2j** (0.2 mmol); <sup>1</sup>H NMR (400 MHz, Chloroform-d) δ 7.55 (d, *J* = 7.2 Hz, 2H), 7.36 (t, *J* = 7.4 Hz, 2H), 7.31 – 7.25 (m, 5H), 5.14 (d, *J* = 8.2 Hz, 2H), 4.78 (s, 1H), 4.06 (s, 2H), 3.79 (d, *J* = 13.2 Hz, 1H), 3.35 (d, *J* = 13.2 Hz, 1H), 3.20 (d, *J* = 13.2 Hz, 1H), 3.09 (d, *J* = 13.2 Hz, 1H), 2.82 (s, 1H), 2.63 (d, *J* = 2.2 Hz, 1H). <sup>13</sup>C NMR (101 MHz, CDCl<sub>3</sub>) δ 144.84, 137.71, 137.15, 133.30, 130.54, 128.85, 128.54, 128.40, 128.13, 115.03, 77.97, 76.84, 66.09, 55.57, 54.40, 54.04. HRMS: calcd. for [M+H]<sup>+</sup> C<sub>20</sub>H<sub>21</sub>ClNO = 326.13062, found: 326.13152; [α]<sub>D</sub><sup>RT</sup> = -53.87 (c = 1.0 in CHCl<sub>3</sub>); HPLC conditions: CHIRALPAK IBN-5 column, hexane/<sup>i</sup>PrOH = 90/10, flow rate = 0.5 mL min<sup>-1</sup>, λ = 234 nm, major enantiomer: t<sub>R</sub> = 11.3 min; minor enantiomer: t<sub>R</sub> = 12.1 min, 95% ee.

**(R)-2-((benzyl(1-phenylprop-2-yn-1-yl)amino)methyl)prop-2-en-1-ol**

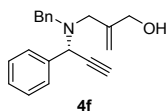

**4f**: 8 h, 97% yield; slightly yellow liquid; According to procedure C, with 10 mol% catalyst, **1a** (0.3 mmol, 1.5 equiv.), **2i** (0.2 mmol); <sup>1</sup>H NMR (400 MHz, Chloroform-d) δ 7.56 (d, *J* = 7.6 Hz, 2H), 7.34 – 7.18 (m, 8H), 5.11 – 5.10 (m, 2H), 4.80 (s, 1H), 4.03 (s, 2H), 3.83 (d, *J* = 13.2 Hz, 1H), 3.35 (d, *J* = 13.2 Hz, 1H), 3.23 – 3.18 (m, 2H), 3.07 (d, *J* = 13.2 Hz, 1H), 2.61 (s, 1H). <sup>13</sup>C NMR (101 MHz, CDCl<sub>3</sub>) δ 144.88, 138.49, 137.80, 129.09, 128.58, 128.36, 128.30, 127.89, 127.44, 114.57, 78.04, 76.69, 65.84, 55.37, 54.58, 54.28. HRMS: calcd. for [M+H]<sup>+</sup> C<sub>20</sub>H<sub>22</sub>NO = 292.16959, found: 292.16986; [α]<sub>D</sub><sup>RT</sup> = -113.87 (c = 1.0 in CHCl<sub>3</sub>); HPLC conditions: CHIRALPAK IBN-5 column, hexane/<sup>i</sup>PrOH = 90/10, flow rate = 0.5 mL min<sup>-1</sup>, λ = 224 nm, major enantiomer: t<sub>R</sub> = 10.3 min; minor enantiomer: t<sub>R</sub> = 12.4 min, 95% ee.

**(R)-N-(furan-2-ylmethyl)-N-(1-phenylprop-2-yn-1-yl)prop-2-en-1-amine**

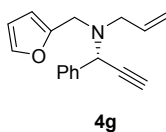

**4g**: 3 h, 65% yield; slightly yellow liquid; According to procedure C; <sup>1</sup>H NMR (400 MHz, Chloroform-d) δ 7.56 (d, *J* = 7.4 Hz, 2H), 7.27 – 7.23 (m, 3H), 7.19 – 7.15 (m, 1H), 6.21 (t, *J* = 2.6 Hz, 1H), 6.15 (d, *J* = 3.2 Hz, 1H), 5.79 – 5.69 (m, 1H), 5.21 (d, *J* = 17.0 Hz, 1H), 5.05 (d, *J* = 10.2 Hz, 1H), 4.77 (s, 1H), 3.63 (d, *J* = 14.4 Hz, 1H), 3.46 (d, *J* = 14.4 Hz, 1H), 3.15 – 3.10 (m, 1H), 2.94 (dd, *J* = 14.2, 8.2 Hz, 1H), 2.46 (d, *J* = 2.2 Hz, 1H). <sup>13</sup>C NMR (101 MHz, CDCl<sub>3</sub>) δ 153.05, 142.07, 138.50, 136.15, 128.25, 128.21, 127.66, 117.72, 110.24, 108.46, 79.18, 75.87, 56.21, 53.54, 47.44. HRMS: calcd. for [M+H]<sup>+</sup> C<sub>17</sub>H<sub>18</sub>NO = 252.13829, found: 252.13839; [α]<sub>D</sub><sup>RT</sup> = -74.43 (c = 1.0 in CHCl<sub>3</sub>); HPLC conditions: CHIRALPAK ADH column, hexane/<sup>i</sup>PrOH = 99.9/0.1, flow rate = 0.3 mL min<sup>-1</sup>, λ = 234 nm, major enantiomer: t<sub>R</sub> = 12.8 min; minor enantiomer: t<sub>R</sub> = 13.4 min, 96% ee.

**(R)-N-(1-phenylprop-2-yn-1-yl)-N-(thiophen-2-ylmethyl)prop-2-en-1-amine**

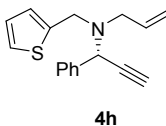

**4h**: 6 h, 92% yield; slightly yellow liquid; According to procedure C; <sup>1</sup>H NMR (400 MHz, Chloroform-d) δ 7.62 (d, *J* = 7.2 Hz, 2H), 7.26 (t, *J* = 7.4 Hz, 2H), 7.20 – 7.16 (m, 1H), 7.13 (d, *J* = 5.0 Hz, 1H), 6.87 (d, *J* = 3.4 Hz, 1H), 6.84 – 6.82 (m, 1H), 5.81 – 5.71 (m, 1H), 5.23 (d, *J* = 17.2 Hz, 1H), 5.06 (d, *J* = 10.2 Hz, 1H), 4.81 (s, 1H), 3.78 (d, *J* = 14.2 Hz, 1H), 3.68 (d, *J* = 14.2 Hz, 1H), 3.18 – 3.11 (m, 1H), 2.93 (dd, *J* = 14.2, 8.4 Hz, 1H), 2.49 (d, *J* = 2.2 Hz, 1H). <sup>13</sup>C NMR (101 MHz, CDCl<sub>3</sub>) δ 144.02, 138.52, 136.27, 128.26, 128.16, 127.69, 126.54, 125.60, 124.98, 117.67, 79.06, 75.91, 55.71, 53.15, 49.55. HRMS: calcd. for [M+H]<sup>+</sup> C<sub>17</sub>H<sub>18</sub>NS = 268.11545, found: 268.11627;

$[\alpha]_D^{25} = -102.90$  ( $c = 1.0$  in  $\text{CHCl}_3$ ); HPLC conditions: CHIRALPAK IBN-5 column, hexane/ $i$ PrOH = 99.9/0.1, flow rate =  $0.3 \text{ mL min}^{-1}$ ,  $\lambda = 254 \text{ nm}$ , major enantiomer:  $t_R = 13.6 \text{ min}$ ; minor enantiomer:  $t_R = 14.4 \text{ min}$ , 95% ee.

**(R)-N-allyl-N-(1-phenylprop-2-yn-1-yl)aniline**

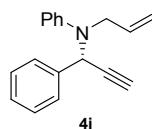

**4i:** 2 h, 82% yield; slightly yellow liquid; According to procedure C;  $^1\text{H NMR}$  (400 MHz, Chloroform- $d$ )  $\delta$  7.50 (d,  $J = 7.8 \text{ Hz}$ , 2H), 7.30 – 7.20 (m, 3H), 7.18 – 7.13 (m, 2H), 6.87 (d,  $J = 7.8 \text{ Hz}$ , 2H), 6.75 (t,  $J = 7.2 \text{ Hz}$ , 1H), 5.75 – 5.65 (m, 2H), 5.12 – 5.08 (m, 1H), 5.00 – 4.97 (m, 1H), 3.85 – 3.72 (m, 2H), 2.44 (d,  $J = 2.4 \text{ Hz}$ , 1H).  $^{13}\text{C NMR}$  (101 MHz,  $\text{CDCl}_3$ )  $\delta$  148.58, 138.00, 135.70, 129.02, 128.54, 127.94, 127.79, 119.08, 116.53, 116.26, 80.95, 74.81, 55.98, 51.40. HRMS: calcd. for  $[\text{M}+\text{H}]^+$   $\text{C}_{18}\text{H}_{18}\text{N} = 248.14338$ , found: 248.14360;  $[\alpha]_D^{25} = +6.07$  ( $c = 1.0$  in  $\text{CHCl}_3$ ); HPLC conditions: CHIRALPAK ADH column, hexane/ $i$ PrOH = 99/1, flow rate =  $0.5 \text{ mL min}^{-1}$ ,  $\lambda = 234 \text{ nm}$ , major enantiomer:  $t_R = 10.3 \text{ min}$ ; minor enantiomer:  $t_R = 12.0 \text{ min}$ , 94% ee.

**(R)-N-methyl-N-(1-phenylprop-2-yn-1-yl)prop-2-en-1-amine**

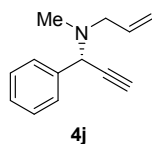

**4j:** 14 h, 67% yield; slightly yellow liquid; According to procedure C;  $^1\text{H NMR}$  (400 MHz, Chloroform- $d$ )  $\delta$  7.58 (d,  $J = 7.6 \text{ Hz}$ , 2H), 7.34 (t,  $J = 7.6 \text{ Hz}$ , 2H), 7.29 – 7.24 (m, 1H), 5.93 – 5.83 (m, 1H), 5.27 (d,  $J = 17.0 \text{ Hz}$ , 1H), 5.16 (d,  $J = 10.2 \text{ Hz}$ , 1H), 4.78 (s, 1H), 3.16 – 3.05 (m, 2H), 2.54 (d,  $J = 2.2 \text{ Hz}$ , 1H), 2.15 (s, 3H).  $^{13}\text{C NMR}$  (101 MHz,  $\text{CDCl}_3$ )  $\delta$  138.38, 136.14, 128.38, 128.26, 127.69, 117.87, 78.93, 76.01, 59.06, 57.78, 37.63. HRMS: calcd. for  $[\text{M}+\text{H}]^+$   $\text{C}_{13}\text{H}_{16}\text{N} = 186.12773$ , found: 186.12785;  $[\alpha]_D^{25} = -1.47$  ( $c = 1.0$  in  $\text{CHCl}_3$ ); HPLC conditions: CHIRALPAK IA column, hexane/ $i$ PrOH = 99.9/0.1, flow rate =  $0.3 \text{ mL min}^{-1}$ ,  $\lambda = 254 \text{ nm}$ , major enantiomer:  $t_R = 12.6 \text{ min}$ ; minor enantiomer:  $t_R = 13.7 \text{ min}$ , 95% ee.

**(R)-N-allyl-N-(1-phenylprop-2-yn-1-yl)prop-2-en-1-amine**

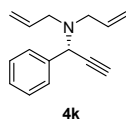

**4k:** 2 h, 74% yield; slightly yellow liquid; According to procedure C;  $^1\text{H NMR}$  (400 MHz, Chloroform- $d$ )  $\delta$  7.55 (d,  $J = 8.2 \text{ Hz}$ , 2H), 7.26 (t,  $J = 7.4 \text{ Hz}$ , 2H), 7.22 – 7.15 (m, 1H), 5.78 – 5.68 (m, 2H), 5.21 – 5.16 (m, 2H), 5.04 (d,  $J = 10.2 \text{ Hz}$ , 2H), 4.82 (d,  $J = 2.2 \text{ Hz}$ , 1H), 3.16 – 3.11 (m, 2H), 2.87 (dd,  $J = 14.2, 8.2 \text{ Hz}$ , 2H), 2.44 (d,  $J = 2.2 \text{ Hz}$ , 1H).  $^{13}\text{C NMR}$  (101 MHz,  $\text{CDCl}_3$ )  $\delta$  138.83, 136.50, 128.24, 128.21, 127.57, 117.51, 79.46, 75.54, 55.95, 53.44. HRMS: calcd. for  $[\text{M}+\text{H}]^+$   $\text{C}_{15}\text{H}_{18}\text{N} = 212.14338$ , found: 212.14411;  $[\alpha]_D^{25} = -10.0$  ( $c = 1.0$  in  $\text{CHCl}_3$ ); HPLC conditions: CHIRALPAK ADH column, hexane/ $i$ PrOH = 99.9/0.1, flow rate =  $0.2 \text{ mL min}^{-1}$ ,  $\lambda = 234 \text{ nm}$ , major enantiomer:  $t_R = 17.0 \text{ min}$ ; minor enantiomer:  $t_R = 17.8 \text{ min}$ , 98% ee.

**(R)-N-(tert-butyl)-N-(1-phenylprop-2-yn-1-yl)prop-2-en-1-amine**

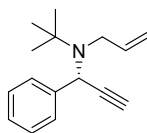

**4l**

**4l:** 4 h, 60% yield; slightly yellow liquid; According to procedure C;  $^1\text{H}$  NMR (400 MHz, Chloroform- $d$ )  $\delta$  7.57 (d,  $J = 8.2$  Hz, 2H), 7.23 (t,  $J = 7.4$  Hz, 2H), 7.15 (t,  $J = 7.2$  Hz, 1H), 5.48 – 5.38 (m, 1H), 4.99 (s, 1H), 4.73 (dd,  $J = 17.4$ , 1.8 Hz, 1H), 4.57 (dd,  $J = 10.2$ , 1.8 Hz, 1H), 3.30 – 3.19 (m, 2H), 2.45 (d,  $J = 2.2$  Hz, 1H), 1.19 (s, 9H).  $^{13}\text{C}$  NMR (101 MHz,  $\text{CDCl}_3$ )  $\delta$  141.23, 141.19, 128.29, 127.87, 127.05, 113.19, 83.93, 75.39, 56.56, 53.01, 48.81, 28.70. HRMS: calcd. for  $[\text{M}+\text{H}]^+$   $\text{C}_{16}\text{H}_{22}\text{N} = 228.17468$ , found: 228.17532;  $[\alpha]_D^{25} = -0.23$  ( $c = 1.0$  in  $\text{CHCl}_3$ ); HPLC conditions: CHIRALPAK ODH column, hexane/ $i$ PrOH = 99.9/0.1, flow rate = 0.3  $\text{mL min}^{-1}$ ,  $\lambda = 234$  nm, major enantiomer:  $t_R = 11.7$  min; minor enantiomer:  $t_R = 13.2$  min, 97% ee.

**(R)-1-(1-phenylprop-2-yn-1-yl)-2,5-dihydro-1H-pyrrole**

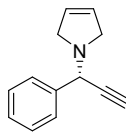

**4m**

**4m:** 14 h, 71% yield; slightly yellow liquid; According to procedure C;  $^1\text{H}$  NMR (400 MHz, Chloroform- $d$ )  $\delta$  7.52 (d,  $J = 7.4$  Hz, 2H), 7.28 (t,  $J = 7.4$  Hz, 2H), 7.23 – 7.19 (m, 1H), 5.69 (s, 2H), 4.77 (d,  $J = 1.6$  Hz, 1H), 3.57 – 3.51 (m, 2H), 3.48 – 3.42 (m, 2H), 2.48 (d,  $J = 2.2$  Hz, 1H).  $^{13}\text{C}$  NMR (101 MHz,  $\text{CDCl}_3$ )  $\delta$  138.92, 128.47, 128.14, 127.81, 127.50, 80.91, 75.95, 58.21, 56.37. HRMS: calcd. for  $[\text{M}+\text{H}]^+$   $\text{C}_{13}\text{H}_{14}\text{N} = 184.11208$ , found: 184.11261;  $[\alpha]_D^{25} = -36.77$  ( $c = 1.0$  in  $\text{CHCl}_3$ ); HPLC conditions: CHIRALPAK IBN-5 column, hexane/ $i$ PrOH = 99/1, flow rate = 0.5  $\text{mL min}^{-1}$ ,  $\lambda = 214$  nm, minor enantiomer:  $t_R = 8.8$  min; major enantiomer:  $t_R = 9.8$  min, 84% ee.

## 5. Absolute configuration determination

The absolute configuration of 4a was assigned by comparison with the literature (G. Hattori, K. Sakata, H. Matsuzawa, Y. Tanabe, Y. Miyake, Y. Nishimayashi, *J. Am. Chem. Soc.* **2010**, *132*, 10592-10608). All other compounds was assigned by analogy.

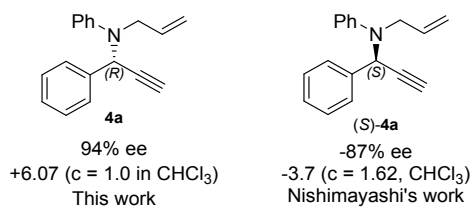

## 6. Derivatization of the enantiomerically enriched *N*-tethered 1,6-enynes

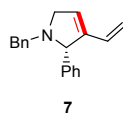

### (*S*)-1-benzyl-2-phenyl-3-vinyl-2,5-dihydro-1*H*-pyrrole

A typical procedure for the ring closing enyne metathesis is as follows: **3a** (0.2 mmol, 1 equiv.) was dissolved in freshly distilled and degassed dichloromethane (2 mL) under nitrogen atmosphere. This solution was degassed again using nitrogen. After stirring for 10 minutes at room temperature, Grubbs catalyst 1st Generation (0.02 mmol, 0.1 equiv.) dissolved in dichloromethane (2 mL) was added by syringe. After refluxing for 26 hours, the reaction was complete as indicated by TLC. After removing the solvent under reduced pressure, the residue was purified by column chromatography on silica gel to give the corresponding pyrrolidine derivative **7**.

**7**: 27 h, 71% yield; slightly yellow liquid;  $^1\text{H NMR}$  (400 MHz, Chloroform-*d*)  $\delta$  7.34 – 7.31 (m, 4H), 7.27 – 7.19 (m, 6H), 6.27 (dd,  $J = 17.8, 11.2$  Hz, 1H), 5.95 (s, 1H), 4.87 (d,  $J = 11.2$  Hz, 1H), 4.80 (d,  $J = 17.8$  Hz, 1H), 4.72 (d,  $J = 4.8$  Hz, 1H), 3.81 (d,  $J = 13.4$  Hz, 1H), 3.74 (d,  $J = 15.8$  Hz, 1H), 3.55 (d,  $J = 13.4$  Hz, 1H), 3.42 (d,  $J = 15.0$  Hz, 1H).  $^{13}\text{C NMR}$  (101 MHz,  $\text{CDCl}_3$ )  $\delta$  142.61, 142.17, 139.75, 130.86, 128.87, 128.67, 128.30, 128.24, 127.50, 127.43, 126.85, 116.00, 73.43, 58.31, 56.78. HRMS: calcd. for  $[\text{M}+\text{H}]^+$   $\text{C}_{19}\text{H}_{20}\text{N} = 262.15903$ , found: 262.15989;  $[\alpha]_D^{25} = +2.50$  ( $c = 1.0$  in  $\text{CHCl}_3$ ); HPLC conditions: CHIRALPAK ODH column, hexane/*PrOH* = 99.9/0.1, flow rate = 0.3 mL  $\text{min}^{-1}$ ,  $\lambda = 254$  nm, major enantiomer:  $t_R = 15.9$  min; minor enantiomer:  $t_R = 20.7$  min, 99% ee.

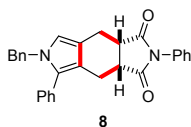

### (*3aR, 8aS*)-6-benzyl-2,5-diphenyl-4,6,8,8a-tetrahydropyrrolo[3,4-*f*]isoindole-1,3(2*H*, 3*aH*)-dione

In a dried schleck tube, the precursor enyne **3a** was diluted with degassed toluene (3 mL) and to this solution was added  $[\text{IrCl}(\text{cod})_2]$  (0.02 mmol, 0.1 equiv.), AcOH (7  $\mu\text{L}$ , 0.12 mmol) and *N*-phenylmaleimide (0.3 mmol, 1.5 equiv.). The solution was refluxed for 16 h under nitrogen atmosphere. After evaporation of the solvent, the residue was purified by flash column chromatography on silica gel eluted with hexane/*AcOEt* to give **8**.

**8**: 16 h, 54% yield; amorphous brown solid;  $^1\text{H NMR}$  (400 MHz, Chloroform-*d*)  $\delta$  7.42 – 7.32 (m, 5H), 7.28 – 7.22 (m, 3H), 7.18 – 7.12 (m, 2H), 7.02 (d,  $J = 7.2$  Hz, 2H), 6.81 (d,  $J = 7.2$  Hz, 1H), 6.54 (s, 1H), 5.07 (d,  $J = 16.0$  Hz, 1H), 4.94 (d,  $J = 16.0$  Hz, 1H), 3.44 – 3.42 (m, 4H), 3.33 – 3.29 (m, 2H), 2.87 – 2.82 (m, 1H), 2.76 – 2.72 (m, 1H).  $^{13}\text{C NMR}$  (101 MHz,  $\text{CDCl}_3$ )  $\delta$  179.73, 179.65, 139.01, 132.23, 131.63, 130.35, 129.91, 129.22, 128.66, 128.63, 128.60, 127.34, 127.26, 126.53, 126.38, 117.51, 117.29, 115.82, 50.57, 41.20, 40.99, 22.84, 21.90. HRMS: calcd. for  $[\text{M}+\text{H}]^+$   $\text{C}_{29}\text{H}_{25}\text{N}_2\text{O}_2 = 433.19105$ , found: 433.19252;  $[\alpha]_D^{25} = -15.7$  ( $c = 1.0$  in  $\text{CHCl}_3$ ); HPLC conditions: CHIRALPAK ADH column, hexane/*PrOH* = 80/20, flow rate = 1.0 mL  $\text{min}^{-1}$ ,  $\lambda = 254$  nm, major enantiomer:  $t_R = 16.5$  min; minor enantiomer:  $t_R = 22.5$  min, 84% ee.

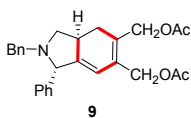

### ((*1S,3aS*)-2-benzyl-1-phenyl-2,3,3a,4-tetrahydro-1*H*-isoindole-5,6-diyl)bis(methylene) diacetate

A solution of **3a** (0.2 mmol, 1 equiv.), but-2-yne-1,4-diyl diacetate (0.6 mmol) and  $[\text{RuCl}(\text{cod})(\text{Cp}^*)]$  (0.02 mmol) in THF (1 mL). The mixture was stirred at 60  $^\circ\text{C}$  until completion of the reaction (monitoring by TLC). Then

cooled the mixture to room temperature, concentrated under reduced pressure. The residue was purified by flash chromatography on silica gel (petroleum ether/ethyl acetate = 10/1).

**9**: 13 h, 50% yield; slightly yellow liquid; <sup>1</sup>H NMR (400 MHz, Acetone-d<sub>6</sub>) δ 7.52 (d, *J* = 8.2 Hz, 2H), 7.39 (t, *J* = 7.6 Hz, 2H), 7.31 – 7.28 (m, 5H), 7.25 – 7.21 (m, 1H), 5.52 (s, 1H), 4.83 (d, *J* = 12.6 Hz, 1H), 4.70 (d, *J* = 12.4 Hz, 1H), 4.58 (d, *J* = 12.6 Hz, 1H), 4.52 (d, *J* = 12.4 Hz, 1H) 4.20 (s, 1H), 3.86 (d, *J* = 13.2 Hz, 1H), 3.33 – 3.25 (m, 2H), 2.92 – 2.83 (m, 1H), 2.43 (dd, *J* = 16.2, 7.8 Hz, 1H), 2.10 (d, *J* = 9.8 Hz, 1H), 2.09 – 2.03 (m, 1H), 1.99 (s, 3H), 1.90 (s, 3H). <sup>13</sup>C NMR (101 MHz, Acetone) δ 170.92, 170.76, 150.43, 143.61, 139.87, 131.34, 131.01, 129.45, 129.27, 128.99, 128.95, 128.21, 127.70, 117.95, 71.93, 63.52, 62.42, 59.15, 58.01, 38.73, 30.62, 20.77, 20.67. HRMS: calcd. for [M+H]<sup>+</sup> C<sub>27</sub>H<sub>30</sub>NO<sub>4</sub> = 432.21693, found: 432.21718; [α]<sub>D</sub><sup>25</sup> = +8.87 (c = 1.0 in CHCl<sub>3</sub>); HPLC conditions: CHIRALPAK IBN-5 column, hexane/<sup>i</sup>PrOH = 90/10, flow rate = 0.3 mL min<sup>-1</sup>, λ = 254 nm, major enantiomer: t<sub>R</sub> = 26.8 min; minor enantiomer: t<sub>R</sub> = 28.8 min, 97% ee; The relative configuration of the compound **9** was determined by 2D NMR spectroscopy.

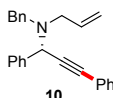

### (S)-N-benzyl-N-(1,3-diphenylprop-2-yn-1-yl)prop-2-en-1-amine

A dried schlenk tube charged with Pd(PPh<sub>3</sub>)<sub>2</sub>Cl<sub>2</sub> (5 mol%) and CuI (7.5 mol%) was filled with nitrogen for three times. The solution of iodobenzene (1.1 equiv.) and **3a** (0.2 mmol, 1 equiv.) in anhydrous acetonitrile (2 mL) was added and heated to 50 °C. At last, triethylamine (3.0 equiv.) was added to the mixture and the resulting mixture was stirred for 5 hours at 50 °C. After the reaction was finished, the solvent was evaporated under reduced pressure and the residue was purified by column chromatography on silica gel (petroleum ether/ethyl acetate = 50/1) to provide the desired product **10**.

**10**: 5 h, 85% yield; slightly yellow liquid; <sup>1</sup>H NMR (400 MHz, Chloroform-d) δ 7.71 (d, *J* = 7.6 Hz, 2H), 7.62 – 7.54 (m, 1H), 7.44 – 7.19 (m, 12H), 5.93 – 5.83 (m, 1H), 5.31 (d, *J* = 17.0 Hz, 1H), 5.15 (d, *J* = 10.2 Hz, 1H), 5.02 (s, 1H), 3.86 (d, *J* = 13.6 Hz, 1H), 3.56 – 3.45 (m, 1H), 3.24 (d, *J* = 12.8 Hz, 1H), 3.09 (dd, *J* = 14.2, 8.2 Hz, 1H). <sup>13</sup>C NMR (101 MHz, CDCl<sub>3</sub>) δ 139.80, 139.43, 136.70, 132.04, 128.97, 128.50, 128.39, 128.37, 128.32, 128.23, 127.55, 127.07, 123.41, 117.57, 88.37, 85.17, 56.45, 54.76, 53.62. HRMS: calcd. for [M+H]<sup>+</sup> C<sub>25</sub>H<sub>24</sub>N = 338.19033, found: 388.19211; [α]<sub>D</sub><sup>25</sup> = -182.33 (c = 1.0 in CHCl<sub>3</sub>); HPLC conditions: CHIRALPAK ADH column, hexane/<sup>i</sup>PrOH = 99.9/0.1, flow rate = 0.3 mL min<sup>-1</sup>, λ = 254 nm, minor enantiomer: t<sub>R</sub> = 16.2 min; major enantiomer: t<sub>R</sub> = 19.8 min, 96% ee.

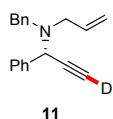

### (R)-N-benzyl-N-(1-phenylprop-2-yn-1-yl-3-d)prop-2-en-1-amine

A flame dried 10 mL round bottomed flask was charged with **3a** (0.2 mmol, 1 equiv. ) and potassium carbonate (0.4 mmol, 2 equiv.) in anhydrous MeCN (2 mL). This was allowed to stir at room temperature for 30 minutes. To this D<sub>2</sub>O (500 μL, ~50 equiv.) was added and left to stir for 1 hour. After the reaction was finished according to TLC, the solvent was removed under reduced pressure and the obtained residue was then purified by column chromatography on silica gel with petroleum ether/ethyl acetate 100/1 as eluent, affording the product **11**.

**11**: 40 h, 65% yield; colorless liquid; <sup>1</sup>H NMR (400 MHz, Chloroform-d) δ 7.65 (d, *J* = 7.6 Hz, 2H), 7.38 – 7.20 (m, 8H), 5.88 – 5.79 (m, 1H), 5.29 (d, *J* = 17.2 Hz, 1H), 5.13 (d, *J* = 10.0 Hz, 1H), 4.81 (s, 1H), 3.79 (d, *J* = 13.6 Hz, 1H), 3.40 (d, *J* = 13.6 Hz, 1H), 3.23 – 3.10 (m, 1H), 2.99 (dd, *J* = 14.0, 8.6 Hz, 1H). <sup>13</sup>C NMR (101 MHz, CDCl<sub>3</sub>) δ 139.64, 138.79, 136.55, 128.91, 128.39, 128.21, 127.59, 127.09, 117.64, 78.68 (t, *J* = 7.7 Hz), 75.89 (t, *J*

= 14.2 Hz), 55.70, 54.49, 53.38. HRMS: calcd. for  $[M+H]^+$   $C_{19}H_{19}DN$  = 263.16530, found: 263.16619;  $[\alpha]_D^{25} = -61.07$  (c = 1.0 in  $CHCl_3$ ); HPLC conditions: CHIRALPAK ODH column, hexane/PrOH = 99.9/0.1, flow rate = 0.3 mL  $min^{-1}$ ,  $\lambda = 224$  nm, major enantiomer:  $t_R = 11.7$  min; minor enantiomer:  $t_R = 12.8$  min, 97% ee.

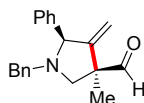

**12**

**(3R, 5S)-1-benzyl-3-methyl-4-methylene-5-phenylpyrrolidine-3-carbaldehyde**

A solution of  $[Rh(cod)Cl]_2$  (0.02 mmol), *rac*-BINAP (0.024 mmol) and  $NaBAR^F$  (0.042 mmol) in DCM (0.6 mL) was stirred under  $N_2$  atmosphere at room temperature for 0.5 h. Then the reaction mixture was degassed, and the reaction vessel was flushed with  $H_2$  atmosphere at room temperature for 2 h. To the mixture was added a solution of **4f** (0.2 mmol, 1 equiv.) in degassed DCM (1.0 mL) and the reaction mixture was stirred at 40 °C until the reaction was finished determined by TLC. After removing the solvent under reduced pressure, the residue was purified by column chromatography on silica gel to give product **12**.

**12**: 4 h, 60% yield; slightly yellow liquid;  $^1H$  NMR (400 MHz, Chloroform- $d$ )  $\delta$  9.56 (s, 1H), 7.41 – 7.24 (m, 10H), 5.00 (d,  $J = 2.6$  Hz, 1H), 4.70 (d,  $J = 2.2$  Hz, 1H), 4.01 – 4.00 (m, 1H), 3.90 (d,  $J = 13.4$  Hz, 1H), 3.42 (d,  $J = 9.8$  Hz, 1H), 3.12 (d,  $J = 13.4$  Hz, 1H), 2.28 (d,  $J = 9.8$  Hz, 1H), 1.23 (s, 3H).  $^{13}C$  NMR (101 MHz,  $CDCl_3$ )  $\delta$  200.24, 154.75, 141.25, 138.33, 128.78, 128.73, 128.64, 128.42, 127.91, 127.19, 111.47, 72.83, 59.52, 57.02, 55.94, 18.58. HRMS: calcd. for  $[M+H]^+$   $C_{20}H_{22}NO$  = 292.16959, found: 292.16934;  $[\alpha]_D^{25} = -23.77$  (c = 1.0 in  $CHCl_3$ ); HPLC conditions: CHIRALPAK ADH column, hexane/PrOH = 99/1, flow rate = 0.3 mL  $min^{-1}$ ,  $\lambda = 224$  nm, minor enantiomer:  $t_R = 18.8$  min; major enantiomer:  $t_R = 23.8$  min, 92% ee; The relative configuration of the compound **12** was determined by 2D NMR spectroscopy.



## 7. Formal total synthesis of (+)-Conessine

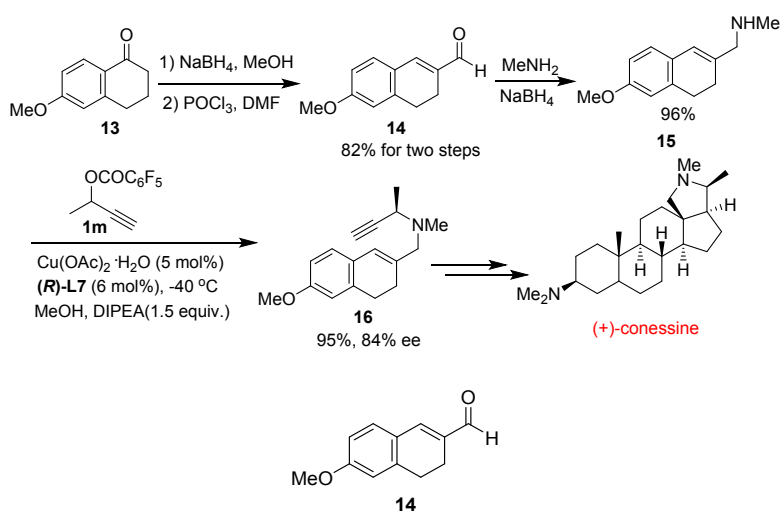

### 6-methoxy-3,4-dihydronaphthalene-2-carbaldehyde

To a solution of 6-methoxy-3,4-dihydronaphthalene-2-carbaldehyde **13** (5.29 g, 30 mmol) in MeOH (90 mL) was added  $\text{NaBH}_4$  (2.27 g, 60 mmol) at  $0^\circ\text{C}$  within 30 min. The cooling bath was removed and stirring continued for 2 hours. The reaction was completed as indicated by TLC analysis. Water (50 mL) was added to the mixture and extraction with  $\text{Et}_2\text{O}$  (3 x 50 mL). The combined organic phase was washed with water (30 mL) and brine (30 mL) then dried over anhydrous sodium sulfate, filtered, concentrated under reduced pressure. The residue was dissolved in anhydrous DMF (20 mL) under nitrogen atmosphere. Afterward,  $\text{POCl}_3$  (7.0 mL) was added dropwise over 1 hour at  $0^\circ\text{C}$ . Then the mixture was heated in  $100^\circ\text{C}$  for 4 hours. Saturated aqueous  $\text{NaOAc}$  solution (30 mL) was added at  $0^\circ\text{C}$ . After stirring for 10 min, the solution was neutralized with 2 M  $\text{NaOH}$  and extracted with  $\text{Et}_2\text{O}$  (3 x 50 mL). The combined organic phases were washed with saturated  $\text{NaHCO}_3$  (30 mL) then dried over anhydrous sodium sulfate, filtered, concentrated under reduced pressure. Recrystallization with Ethyl acetate/Hexane provided the target compound **14** (4.62 g).

**14**: 4 h, 82% yield for two steps; white solid;  $^1\text{H NMR}$  (400 MHz, Chloroform- $d$ )  $\delta$  9.61 (s, 1H), 7.27 – 7.22 (m, 2H), 6.79 – 6.76 (m, 2H), 3.84 (s, 3H), 2.85 (t,  $J = 8.2$  Hz, 2H), 2.55 (t,  $J = 8.2$  Hz, 2H).

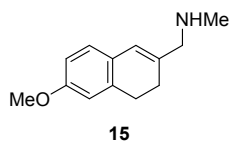

### 1-(6-methoxy-3,4-dihydronaphthalen-2-yl)- $N$ -methylmethanamine

To a solution of **14** (1.88 g, 10 mmol) in anhydrous MeOH (20 mL) was added  $\text{CH}_3\text{NH}_2$  (30-33% in MeOH, 1.58 mL, 12 mmol) at  $0^\circ\text{C}$ . The cooling bath was removed and stirring continued at room temperature. The reaction was finished in 3 hours determined by GC-MS.  $\text{NaBH}_4$  (0.453 g, 12 mmol) was added to the above mixture at  $0^\circ\text{C}$  within 20 min and stirred for additional 2 hours at room temperature. Water (50 mL) was added to the mixture and the organic solvent was removed under reduced pressure. Subsequently, extraction with dichloromethane (3 x 50 mL). The combined organic phase was washed with brine (30 mL) then dried over anhydrous sodium sulfate, filtered, concentrated under reduced pressure, providing the target compound **15** (2.03 g).

**15**: 2 h, 96% yield; slightly yellow liquid;  $^1\text{H}$  NMR (400 MHz, Chloroform- $d$ )  $\delta$  6.95 (d,  $J$  = 9.0 Hz, 1H), 6.69 – 6.66 (m, 2H), 6.32 (s, 1H), 3.79 (s, 3H), 3.31 (s, 2H), 2.81 (t,  $J$  = 8.0 Hz, 2H), 2.45 (s, 3H), 2.27 (t,  $J$  = 8.0 Hz, 2H);  $^{13}\text{C}$  NMR (101 MHz,  $\text{CDCl}_3$ )  $\delta$  158.49, 137.03, 136.73, 127.69, 126.78, 122.86, 113.68, 111.20, 57.45, 55.40, 36.12, 28.70, 25.73; HRMS: calcd. for  $[\text{M}+\text{Na}]^+$   $\text{C}_{13}\text{H}_{17}\text{NONa}$  = 226.12024, found: 262.12050.

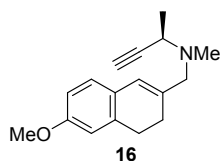

**(*R*)-*N*-((6-methoxy-3,4-dihydronaphthalen-2-yl)methyl)-*N*-methylbut-3-yn-2-amine**

**16**: 95% yield; slightly yellow liquid; According to procedure C, with (*R*)-**L7**, -40 °C, **1m** (0.4 mmol), **15** (0.6 mmol), MeOH (2 mL);  $^1\text{H}$  NMR (400 MHz, Chloroform- $d$ )  $\delta$  6.96 (d,  $J$  = 8.0 Hz, 1H), 6.70 – 6.68 (m, 2H), 6.36 (s, 1H), 3.80 (s, 3H), 3.64 (qd,  $J$  = 7.0, 2.4 Hz, 1H), 3.18 (d,  $J$  = 13.0 Hz, 1H), 3.05 (d,  $J$  = 13.0 Hz, 1H), 2.83 – 2.78 (m, 2H), 2.35 – 2.26 (m, 3H), 2.24 (s, 3H), 1.35 (d,  $J$  = 7.0 Hz, 3H).  $^{13}\text{C}$  NMR (101 MHz,  $\text{CDCl}_3$ )  $\delta$  158.54, 136.96, 136.28, 127.68, 126.80, 124.73, 113.68, 111.14, 82.35, 72.56, 60.73, 55.37, 49.94, 37.51, 28.78, 25.57, 19.98. HRMS: calcd. for  $[\text{M}+\text{H}]^+$   $\text{C}_{17}\text{H}_{22}\text{NO}$  = 256.16959, found: 256.16897;  $[\alpha]_D^{25}$  = +140.53 (c = 1.0 in  $\text{CHCl}_3$ ); HPLC conditions: CHIRALPAK ADH column, hexane/ $\text{PrOH}$  = 95/5, flow rate = 0.3 mL  $\text{min}^{-1}$ ,  $\lambda$  = 254 nm, minor enantiomer:  $t_R$  = 13.8 min; major enantiomer:  $t_R$  = 14.7 min, 84% ee.

## 8. X-ray Crystallographic Data

Crystal data and structure refinement for complexes of CuCl and L7.

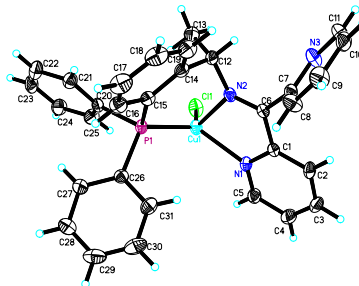

| Compound                                | <b>CuCl + L7</b>                                               |
|-----------------------------------------|----------------------------------------------------------------|
| Empirical formula                       | $C_{31}H_{26}ClCuN_3P$                                         |
| Formula weight/g·mol <sup>-1</sup>      | 570.51                                                         |
| Temperature/K                           | 296(2)                                                         |
| Crystal system                          | Triclinic                                                      |
| Space group                             | P1                                                             |
| a/Å                                     | 8.8768(17)                                                     |
| b/Å                                     | 8.8907(18)                                                     |
| c/Å                                     | 9.3073(18)                                                     |
| $\alpha$ /°                             | 87.751(3)                                                      |
| $\beta$ /°                              | 68.299(2)                                                      |
| $\gamma$ /°                             | 82.837(3)                                                      |
| Volume/Å <sup>3</sup>                   | 677.1(2)                                                       |
| Z                                       | 1                                                              |
| $\rho_{\text{calc}}$ g/cm <sup>3</sup>  | 1.399                                                          |
| $\mu$ /mm <sup>-1</sup>                 | 0.989                                                          |
| F(000)                                  | 294.0                                                          |
| Crystal size/mm <sup>3</sup>            | 0.12 x 0.1 x 0.1                                               |
| Radiation                               | MoK $\alpha$ ( $\lambda$ = 0.71073)                            |
| 2 $\theta$ range for data collection/°  | 4.618 to 54.874                                                |
|                                         | -11 ≤ h ≤ 11                                                   |
| Index ranges                            | -11 ≤ k ≤ 11                                                   |
|                                         | -11 ≤ l ≤ 12                                                   |
| Reflections collected                   | 5695                                                           |
| Independent reflections                 | 4709 [ $R_{\text{int}}$ = 0.0219, $R_{\text{sigma}}$ = 0.0676] |
| Data/restraints/parameters              | 4709/3/324                                                     |
| Goodness-of-fit on $F^2$                | 0.999                                                          |
| Final R indexes [ $I \geq 2\sigma(I)$ ] | $R_1$ = 0.0360, $wR_2$ = 0.0894                                |

|                                             |                                  |
|---------------------------------------------|----------------------------------|
| Final R indexes [all data]                  | $R_1 = 0.0443$ , $wR_2 = 0.0930$ |
| Largest diff. peak/hole / e Å <sup>-3</sup> | 0.63/-0.42                       |
| Flack parameter                             | 0.041(17)                        |

---

## 9. NMR Spectra and HPLC Data

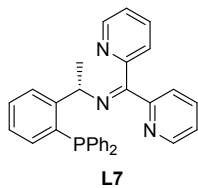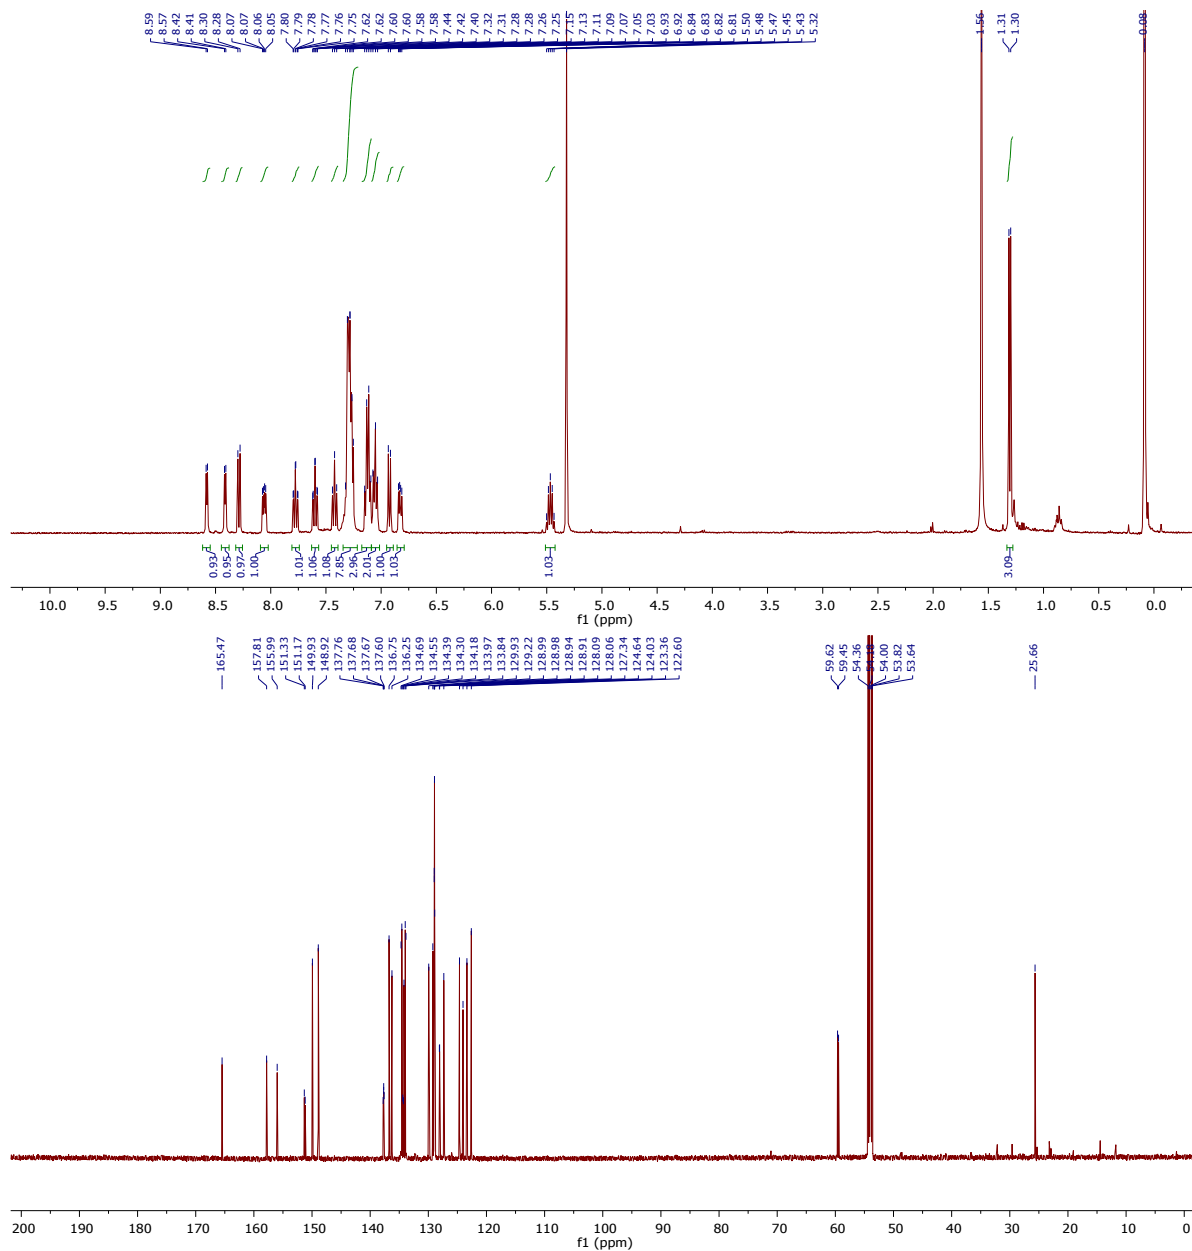

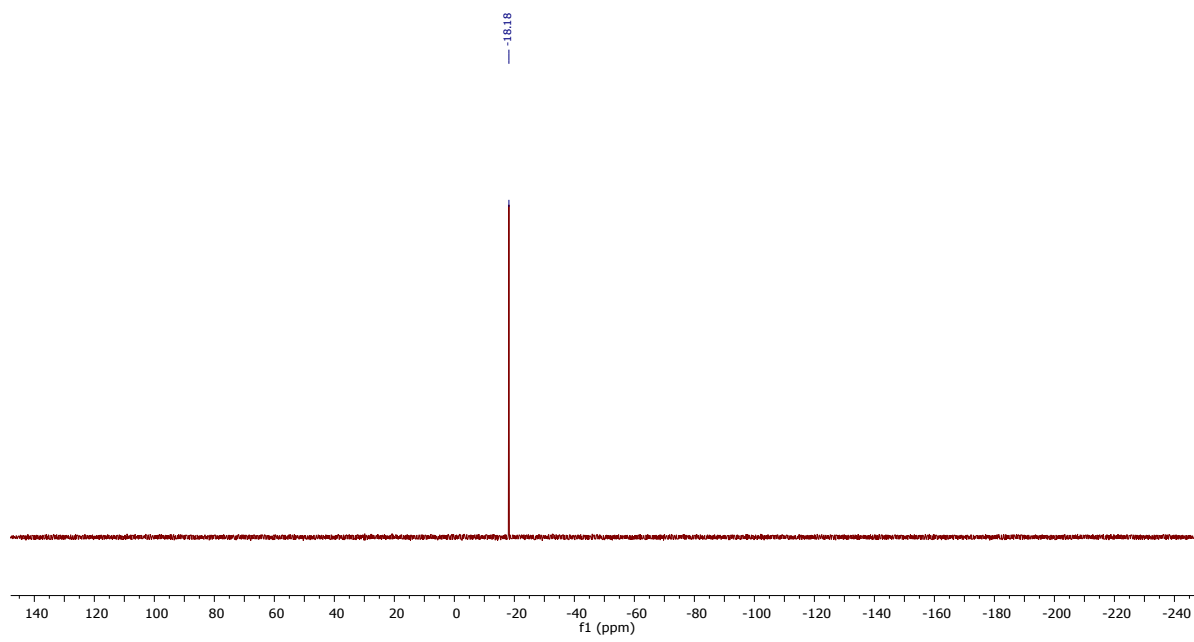

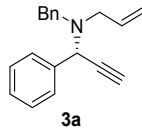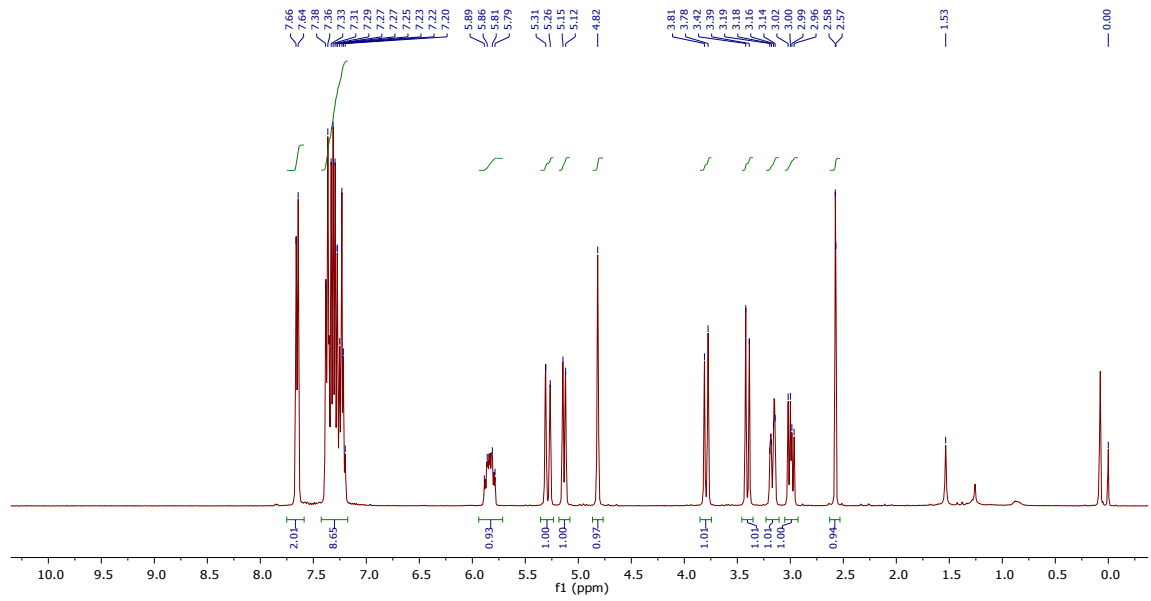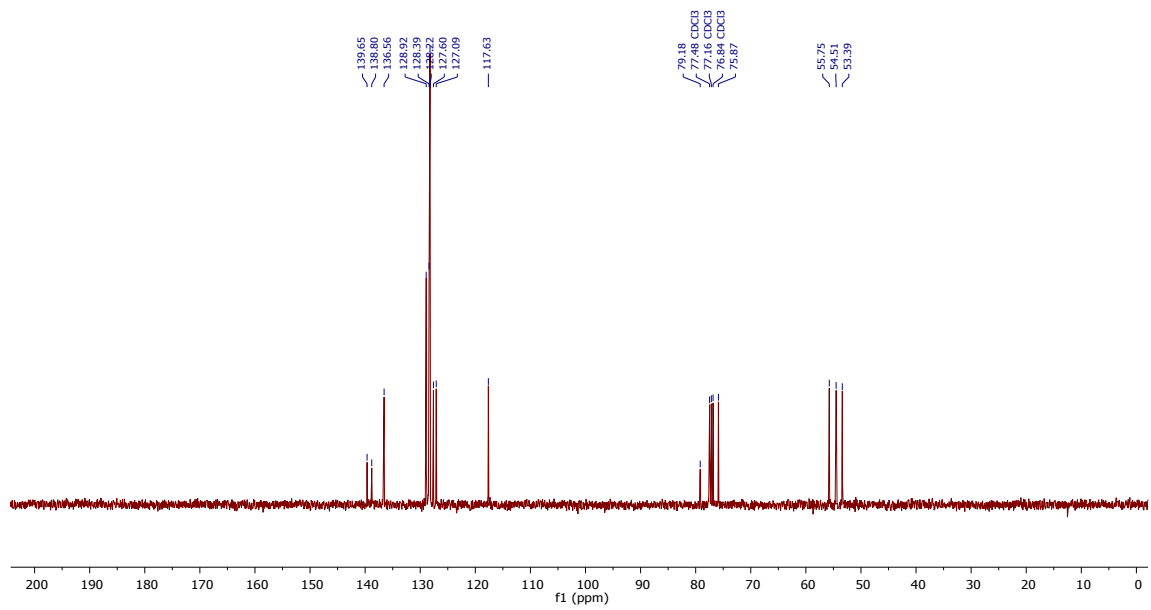

### HPLC trace of *rac-3a*

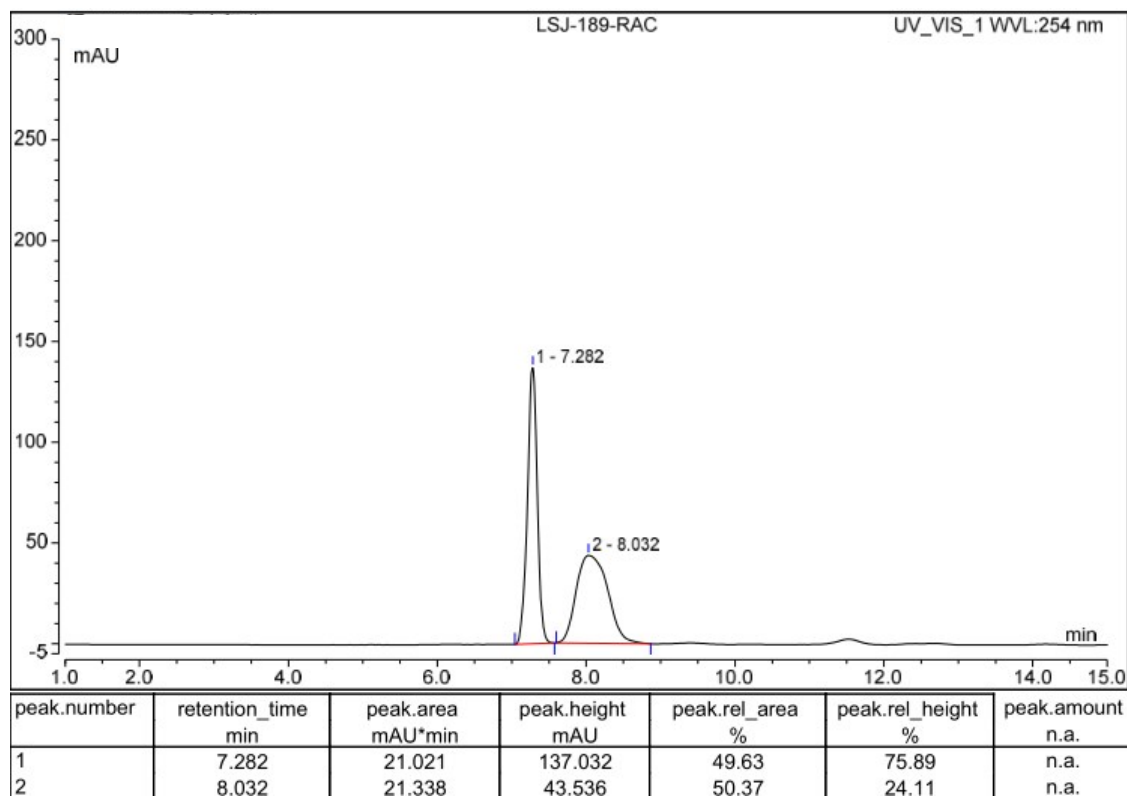

### HPLC trace of 3a

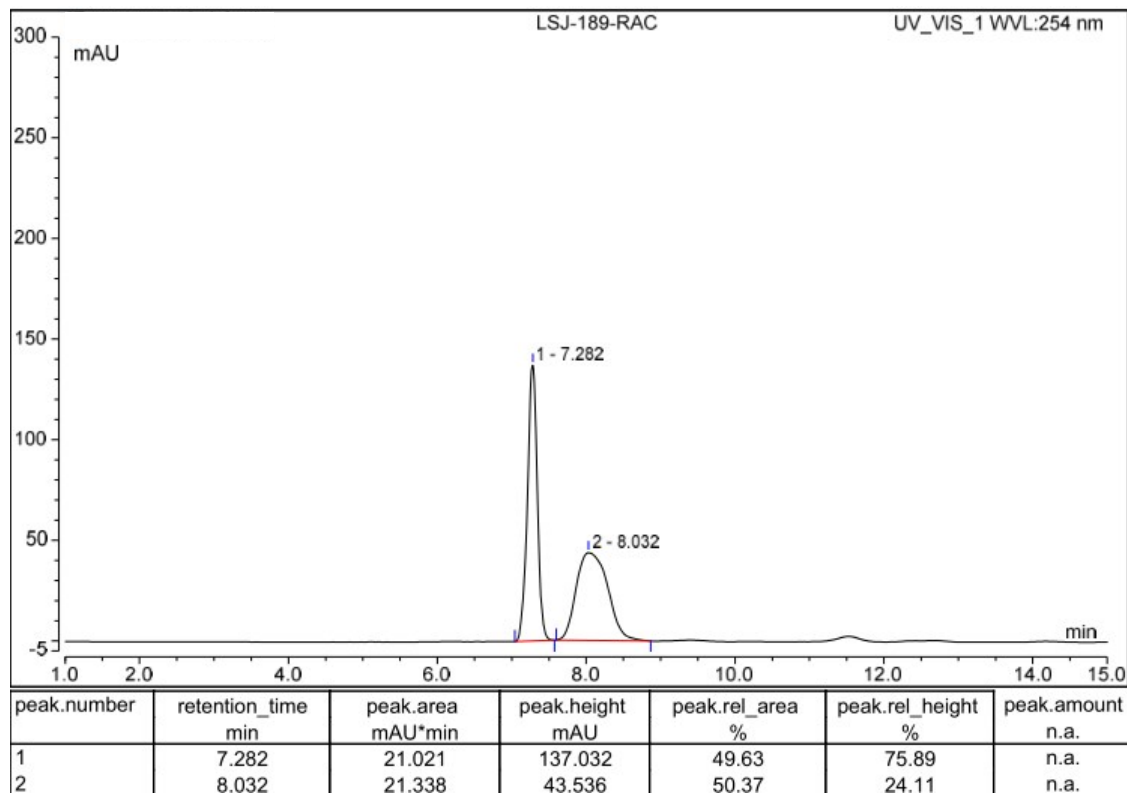



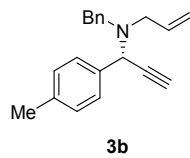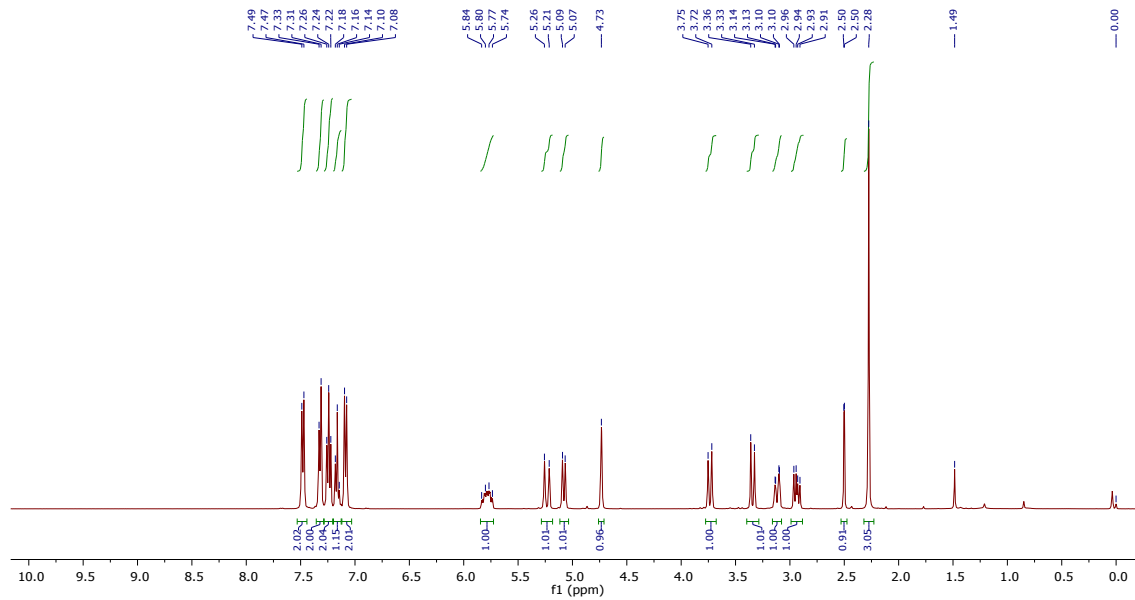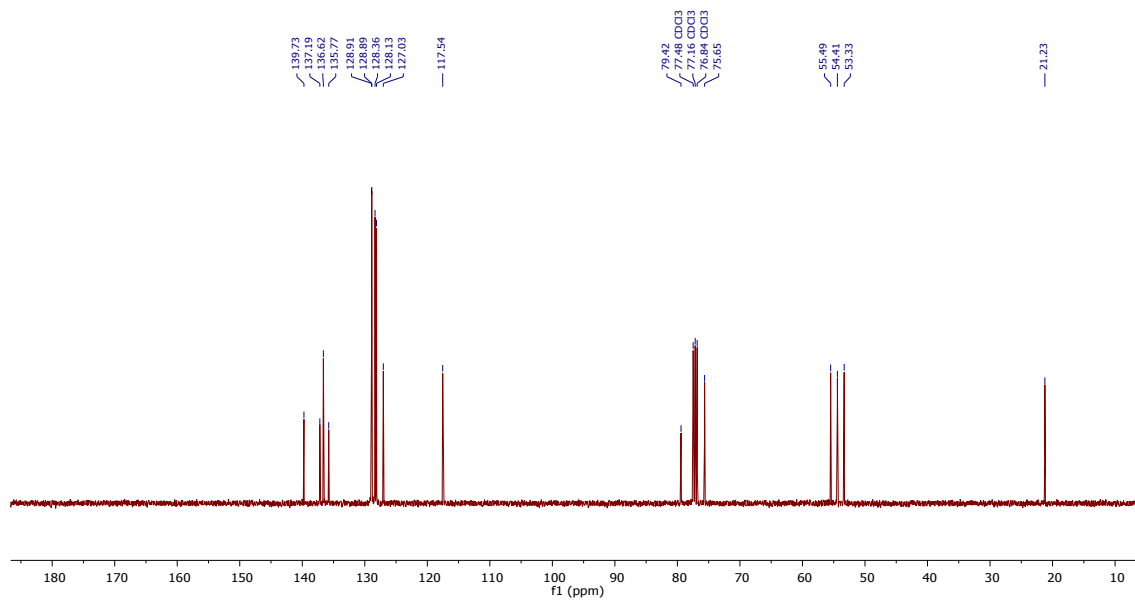

### HPLC trace of *rac-3b*

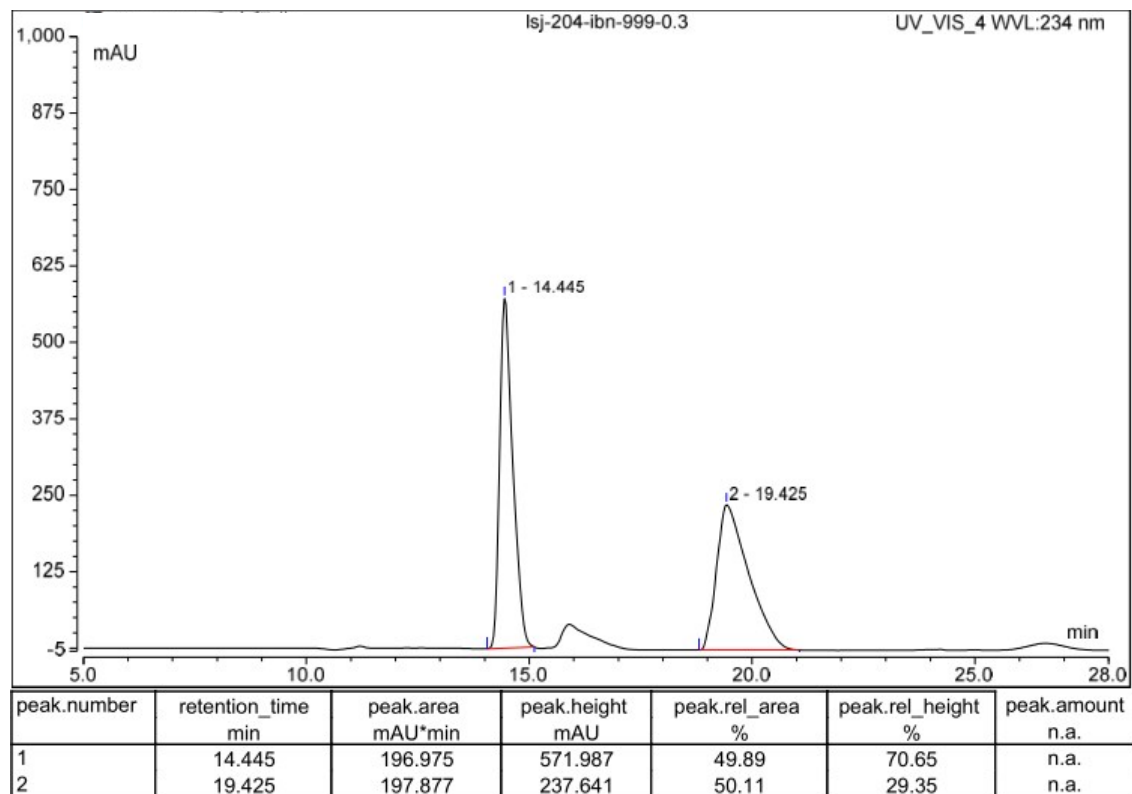

### HPLC trace of 3b

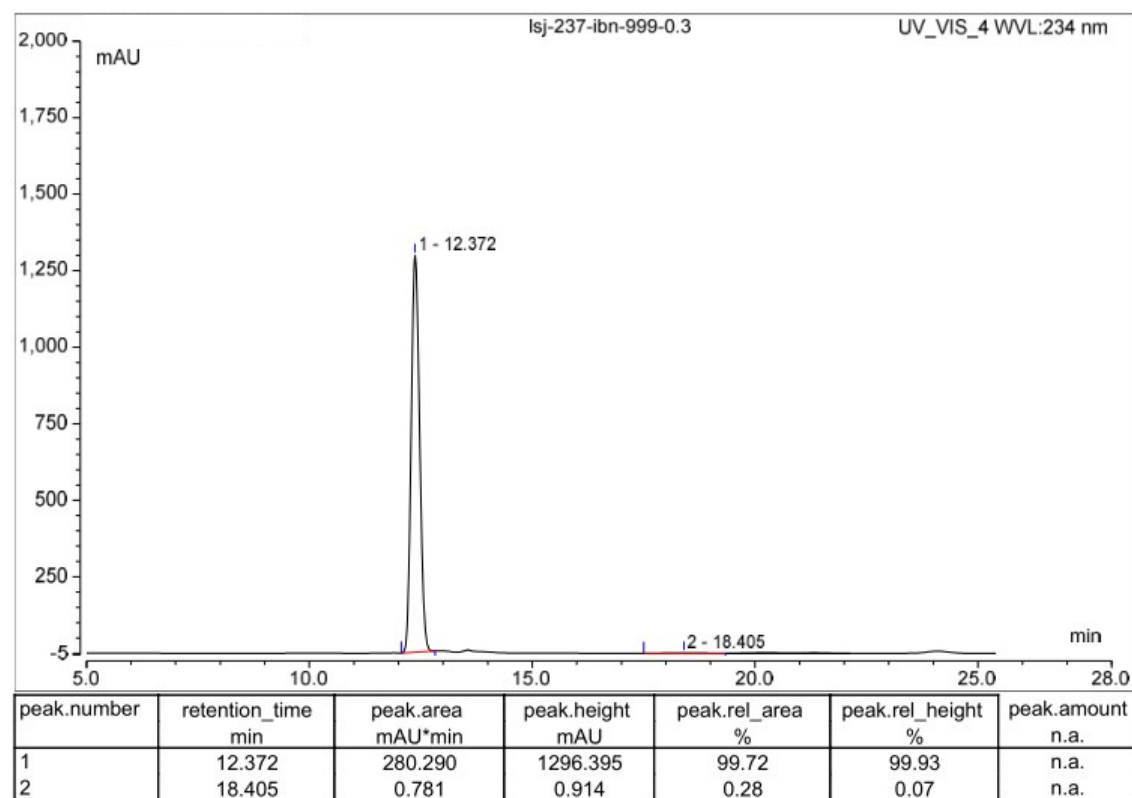

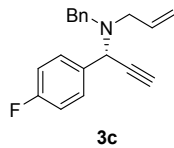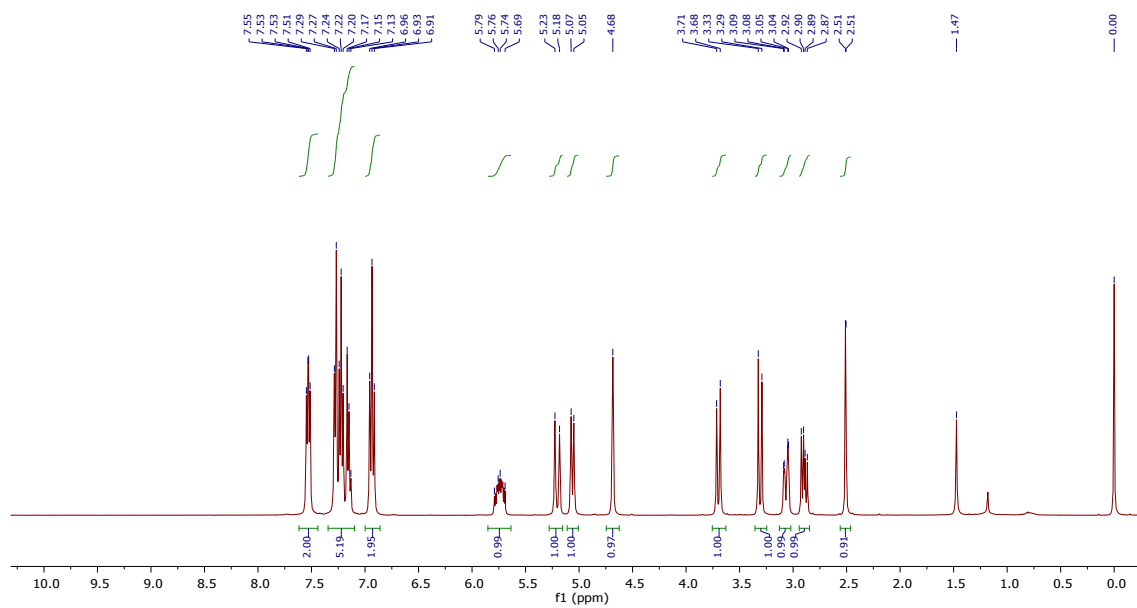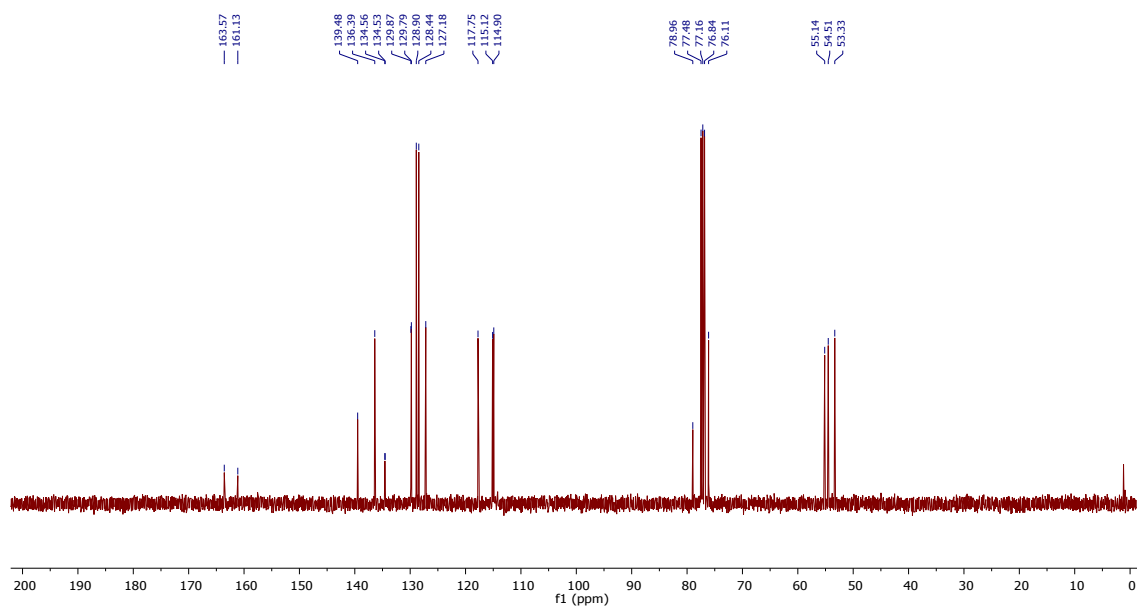

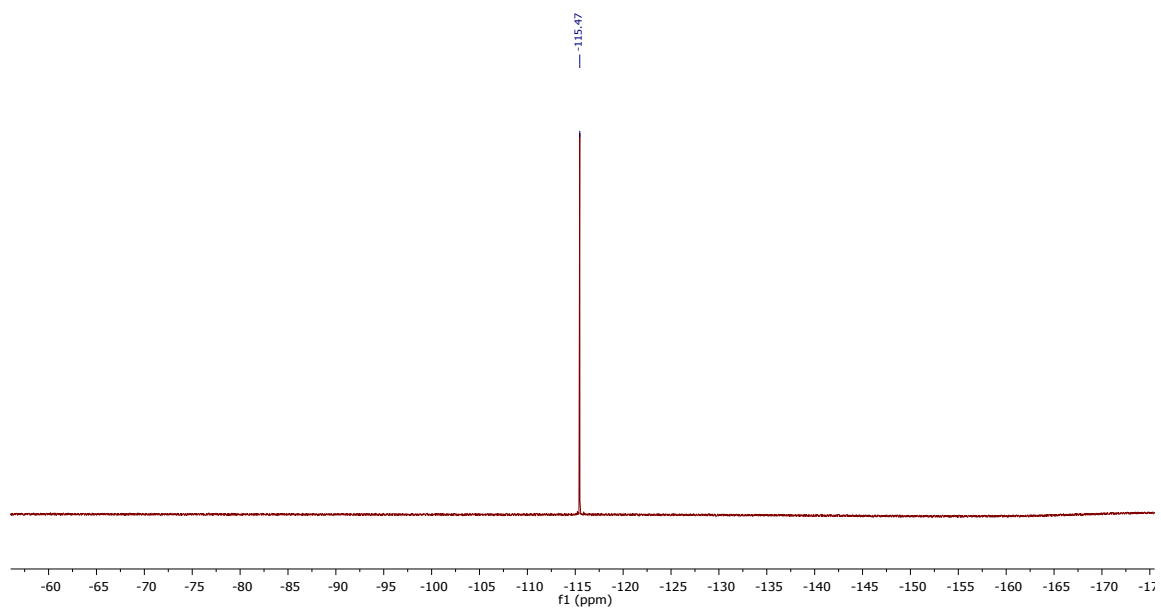

### HPLC trace of *rac-3c*

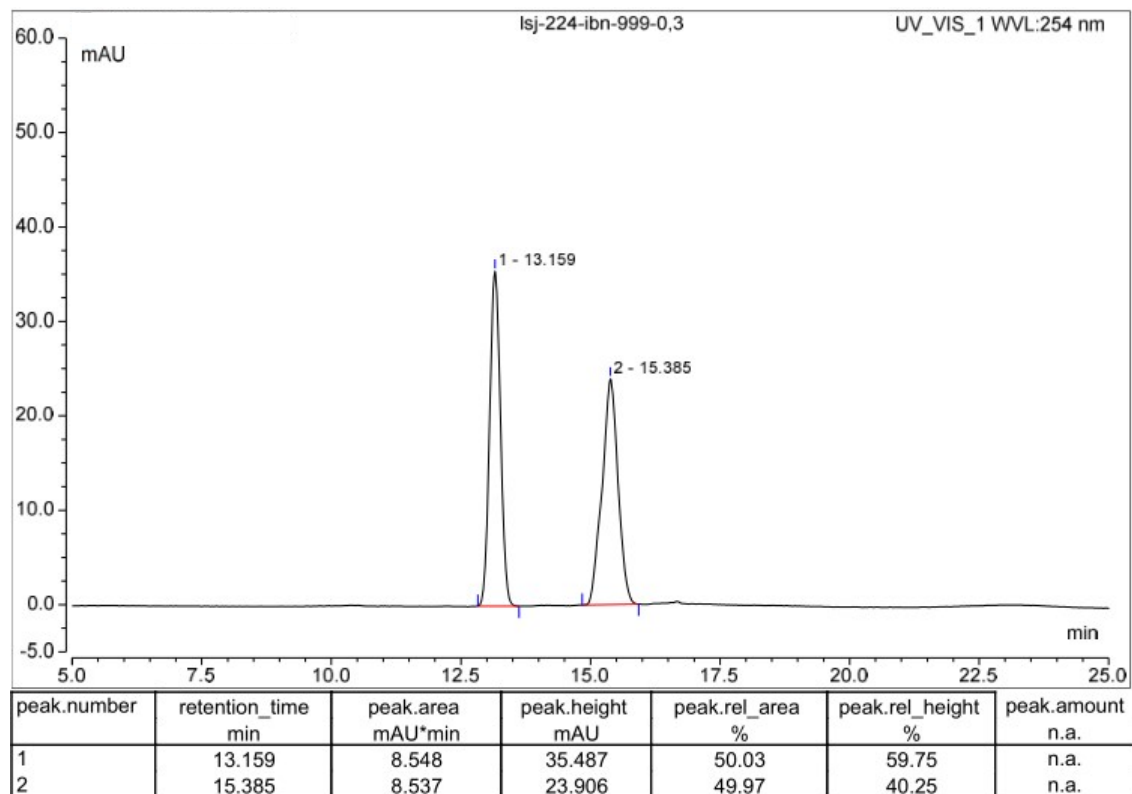

### HPLC trace of *3c*

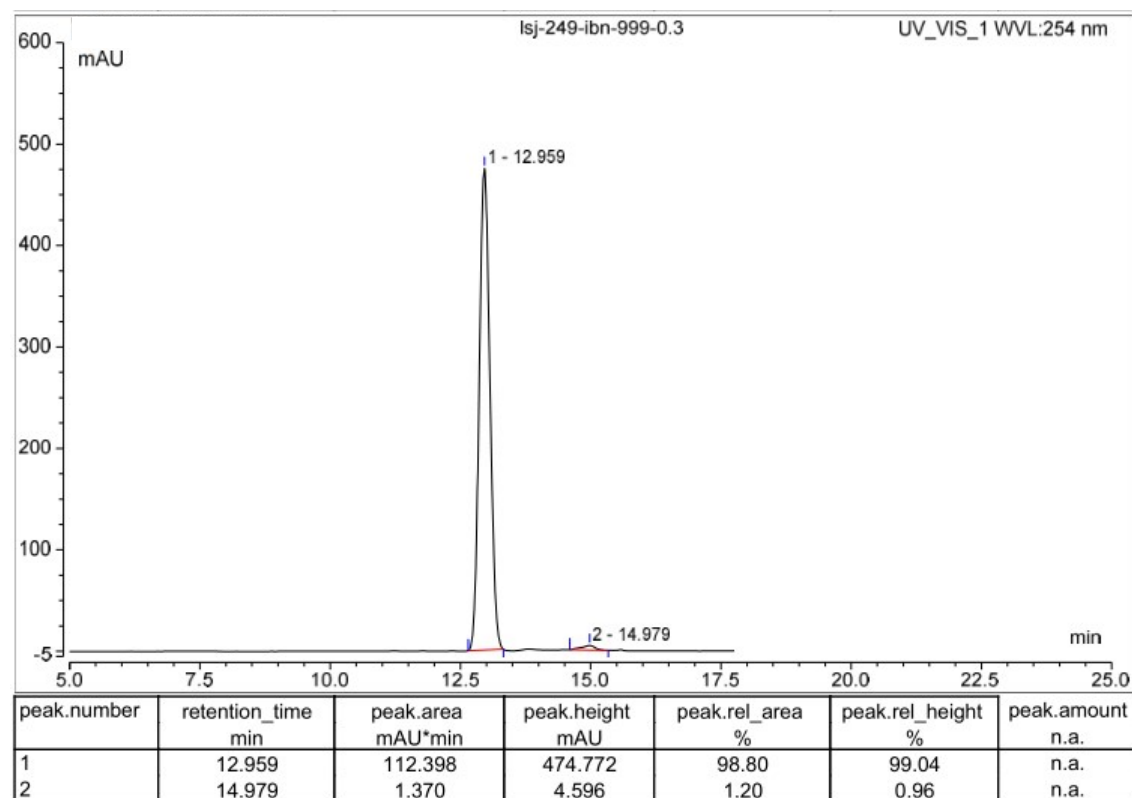

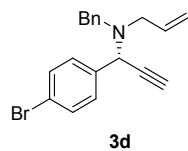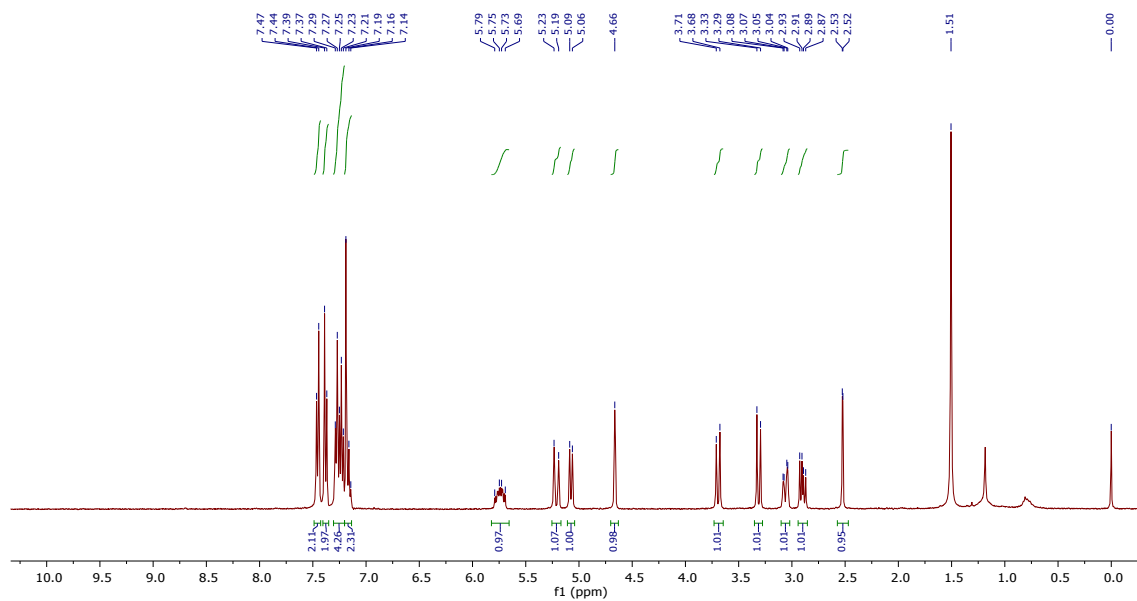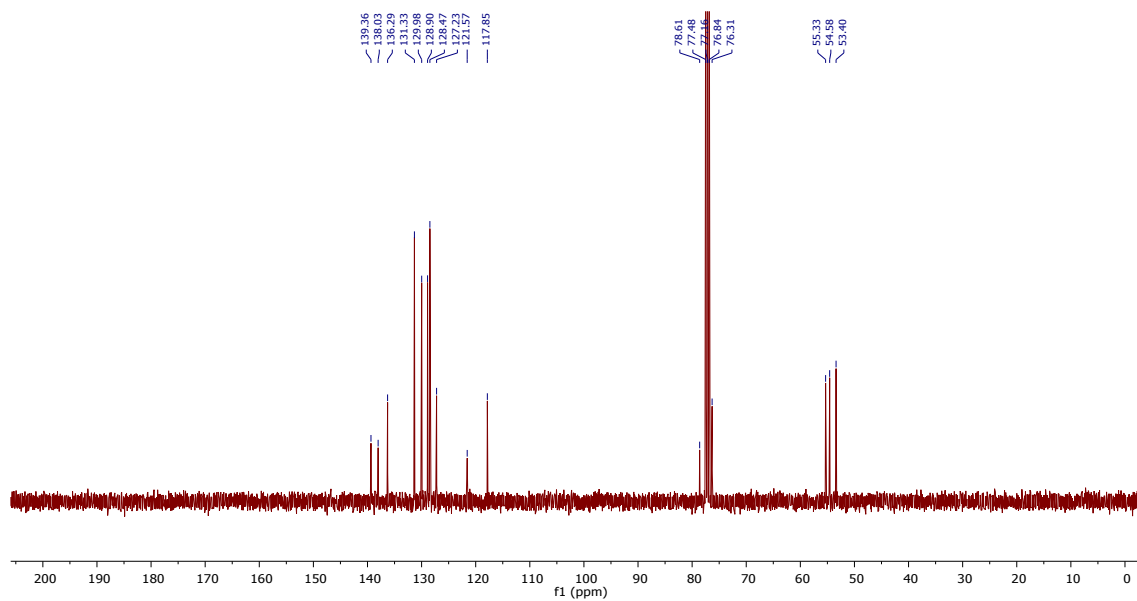

### HPLC trace of *rac-3d*

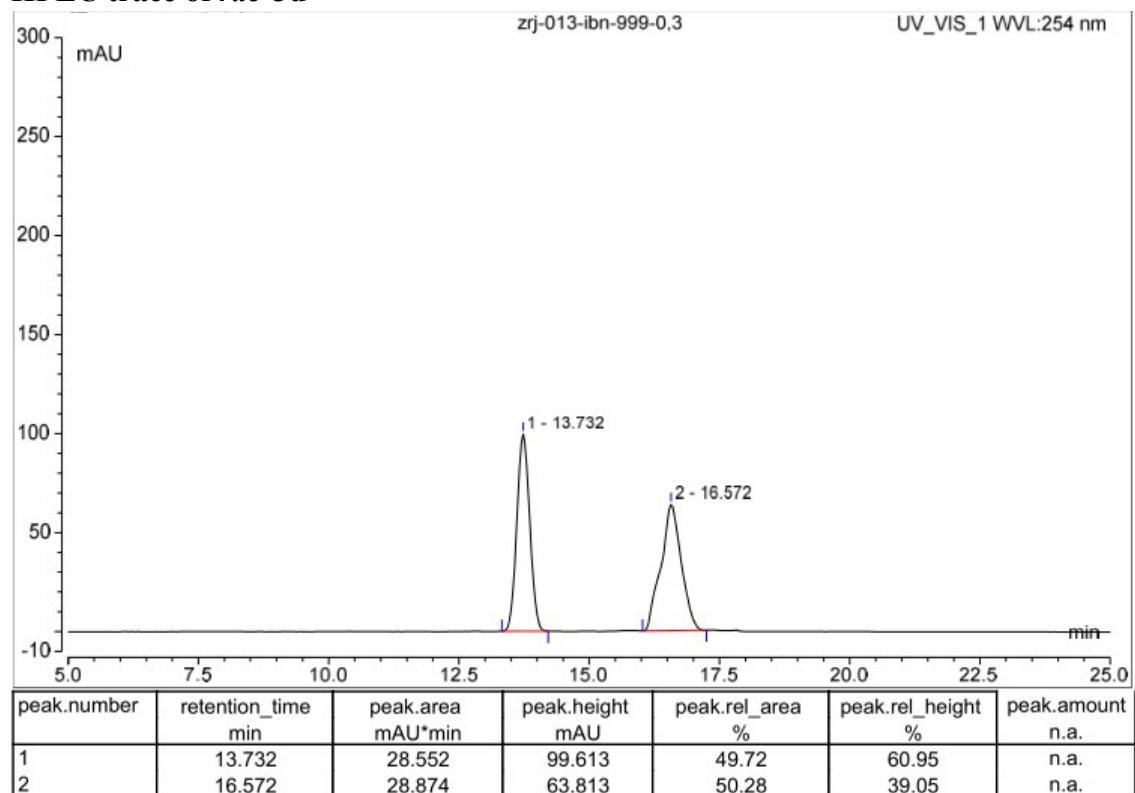

### HPLC trace of 3d

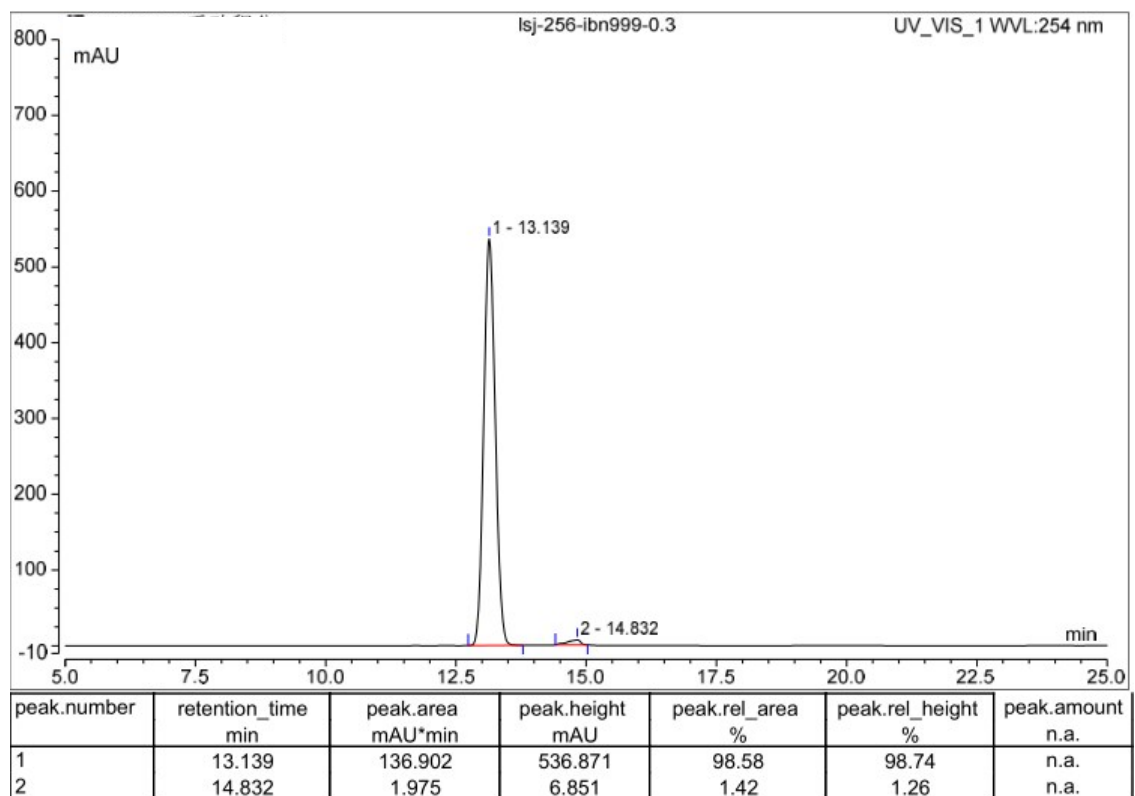

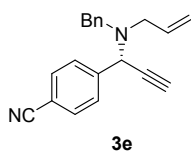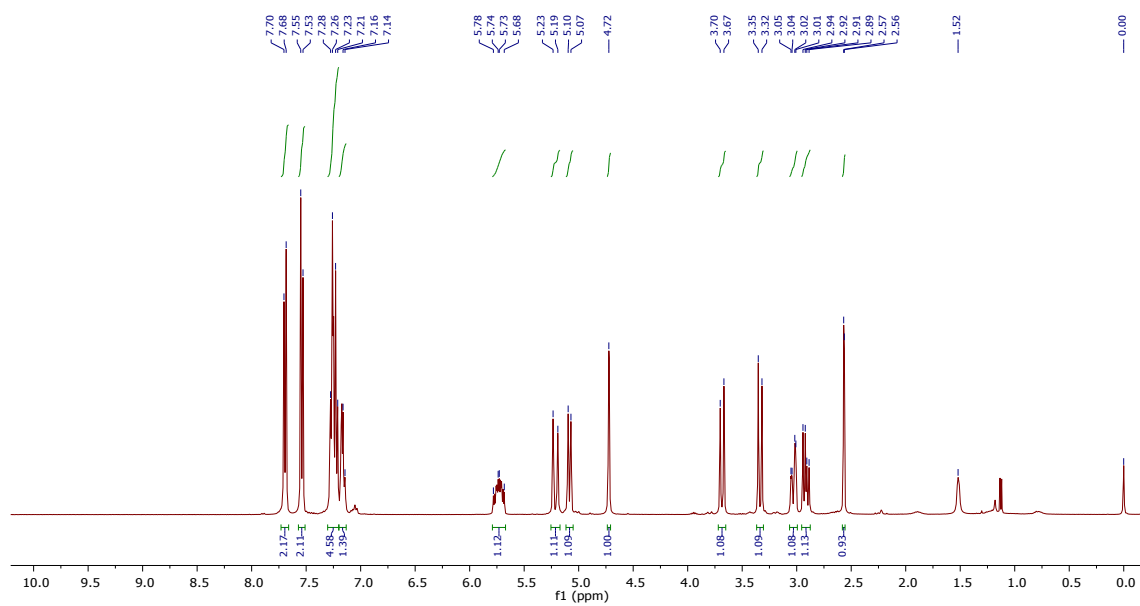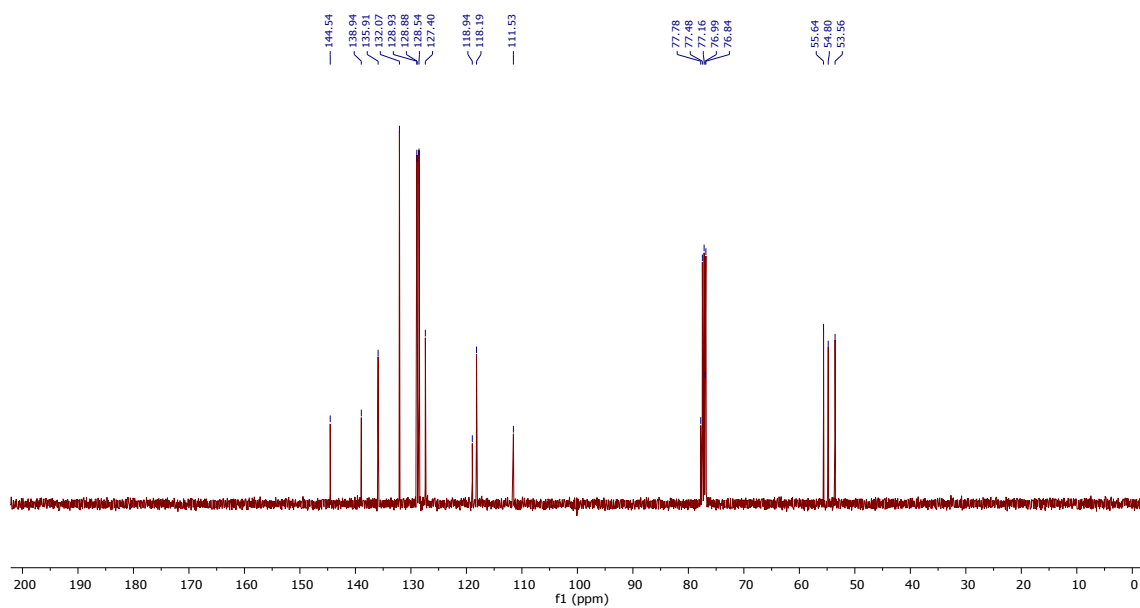



### HPLC trace of *rac-3e*

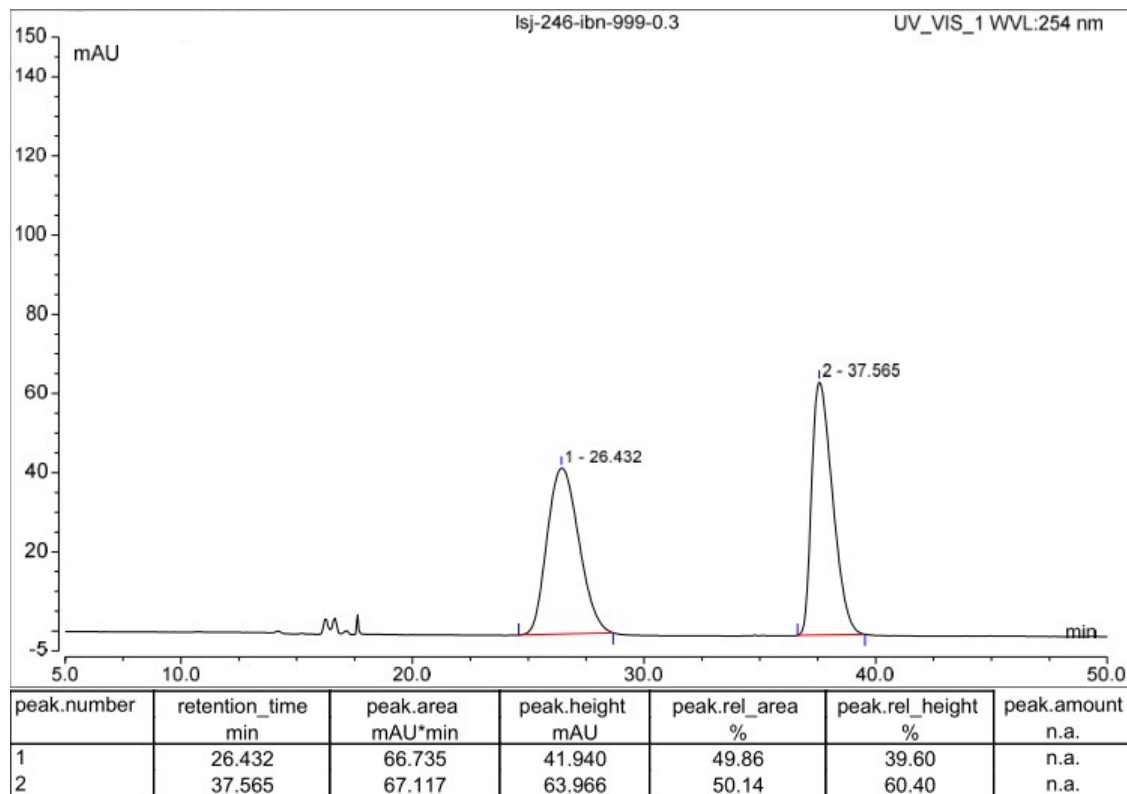

### HPLC trace of *3e*

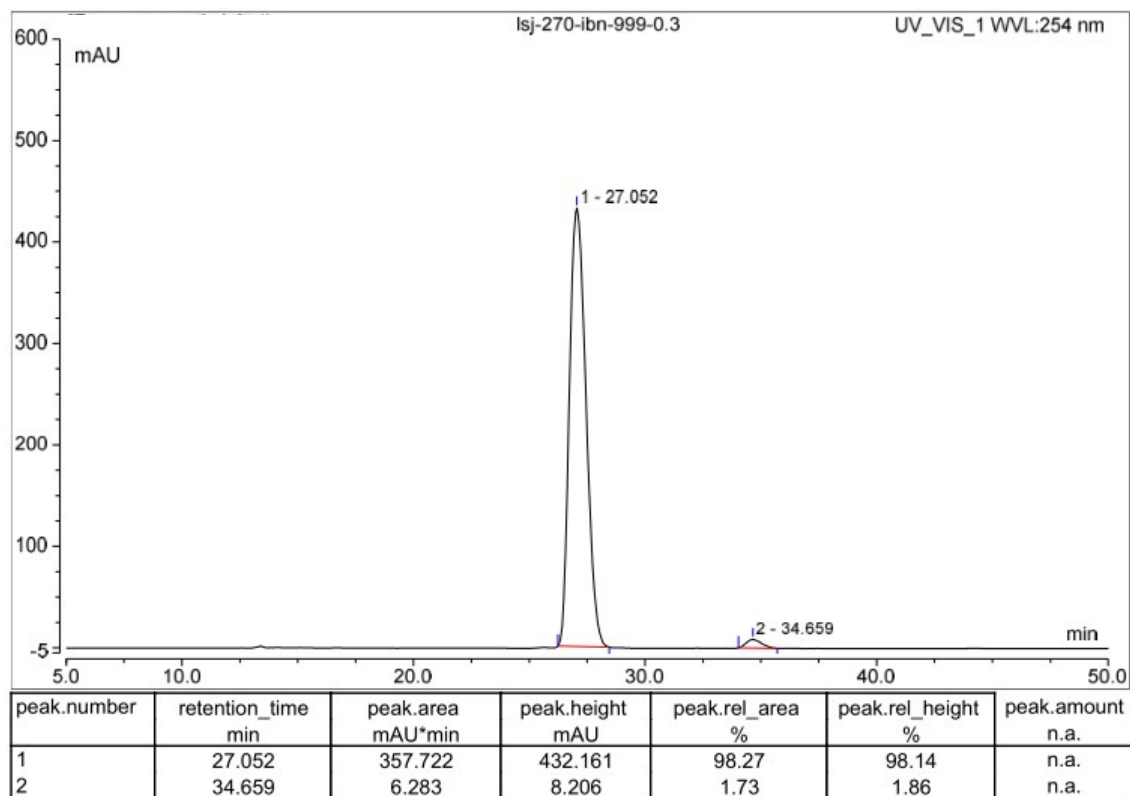

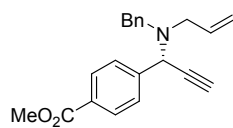

**3f**

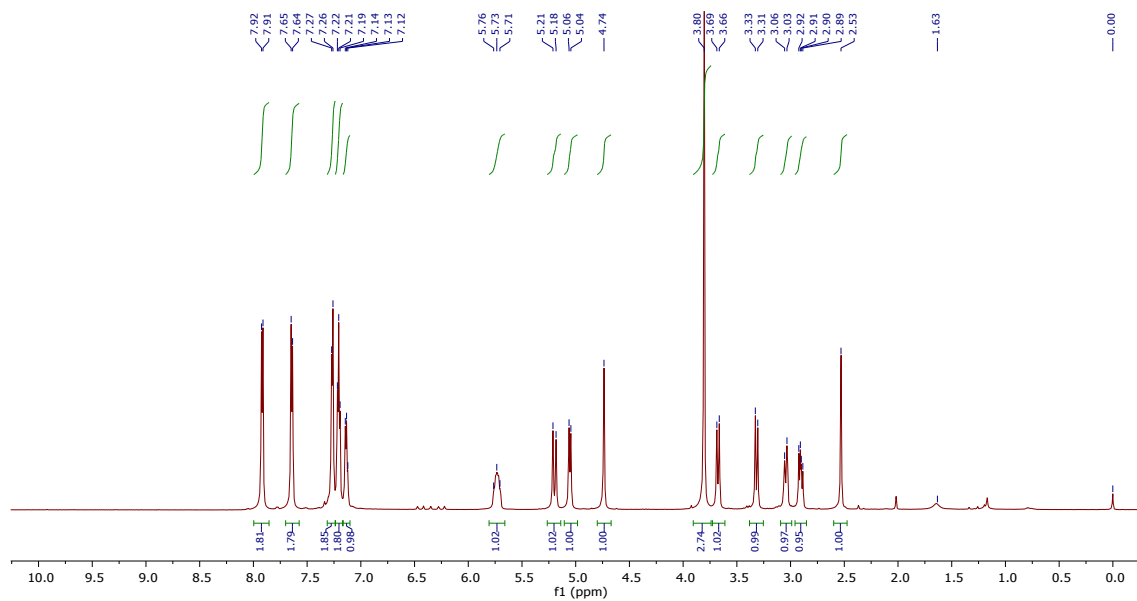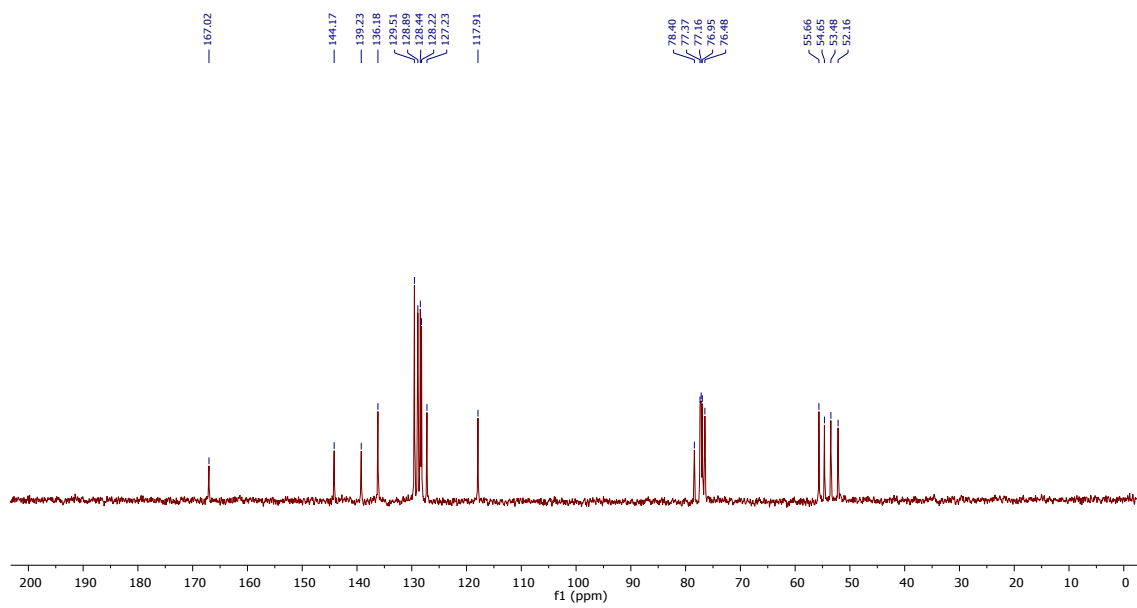

### HPLC trace of *rac-3f*

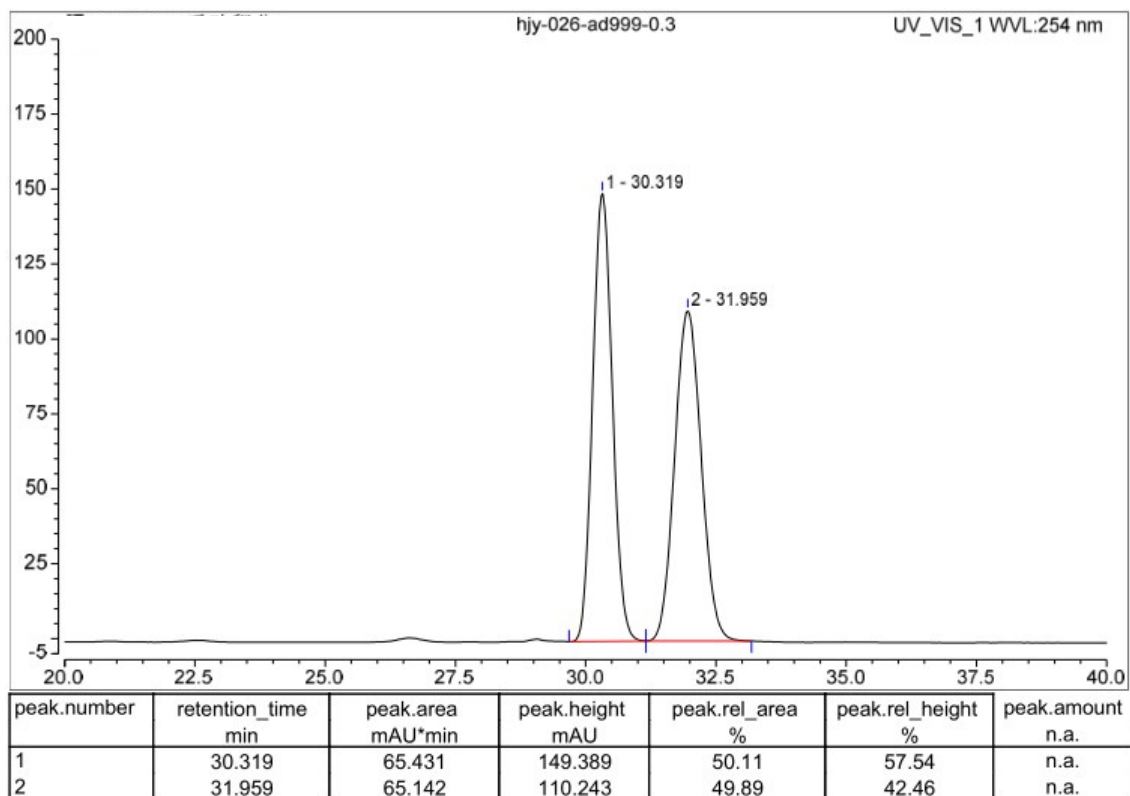

### HPLC trace of *3f*

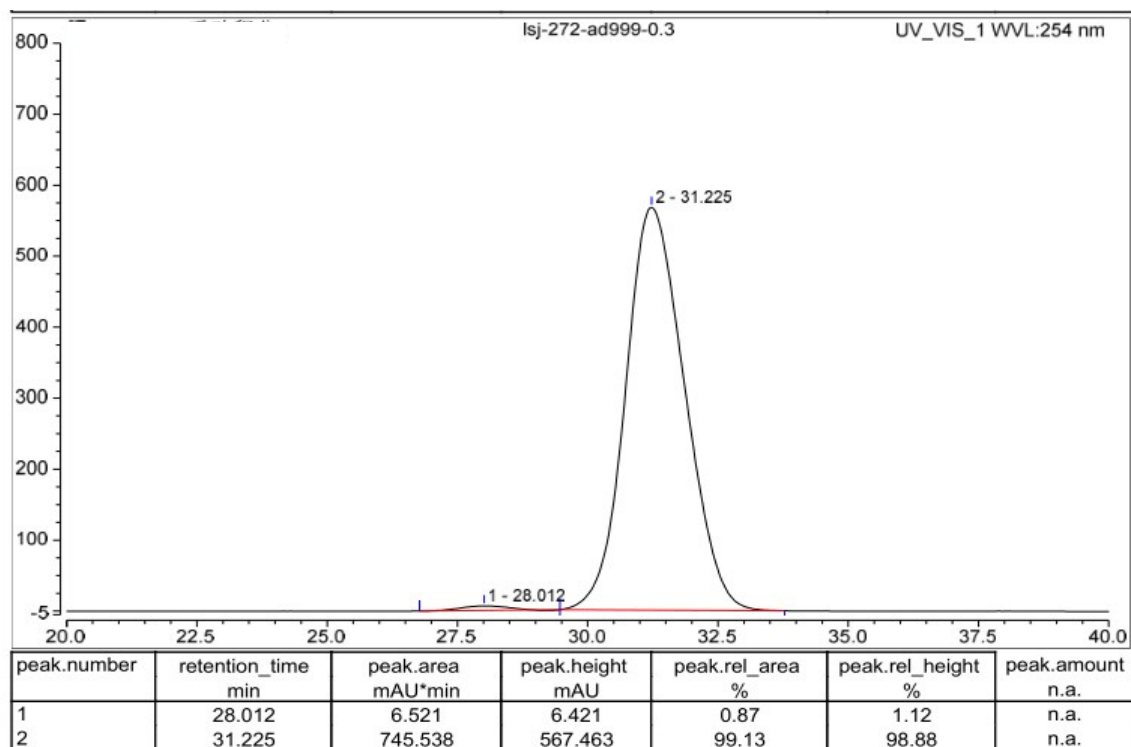

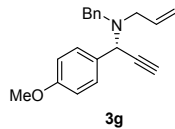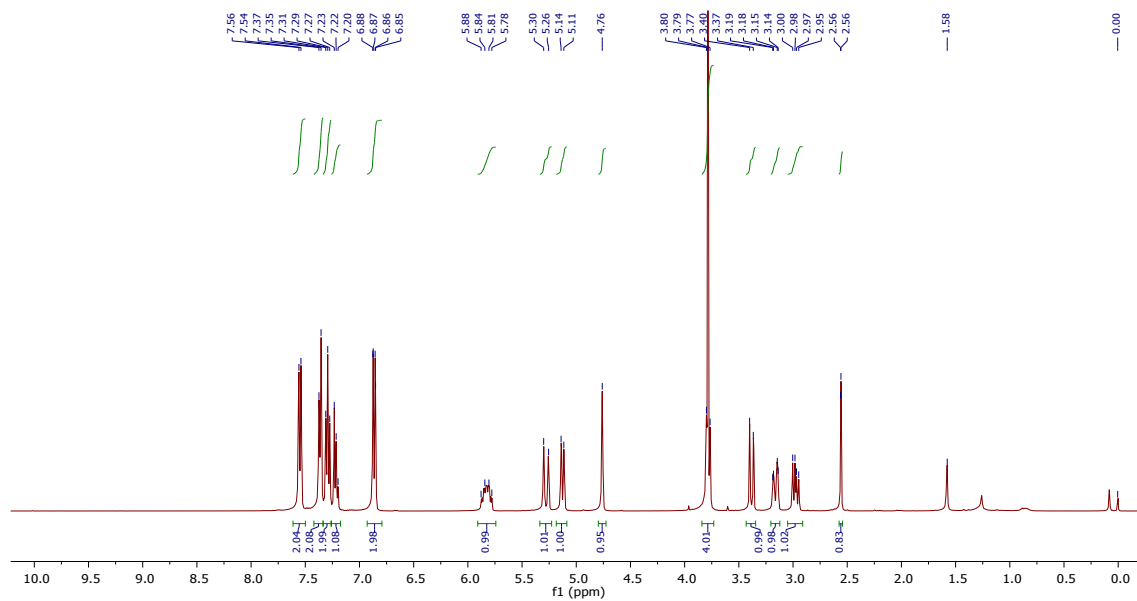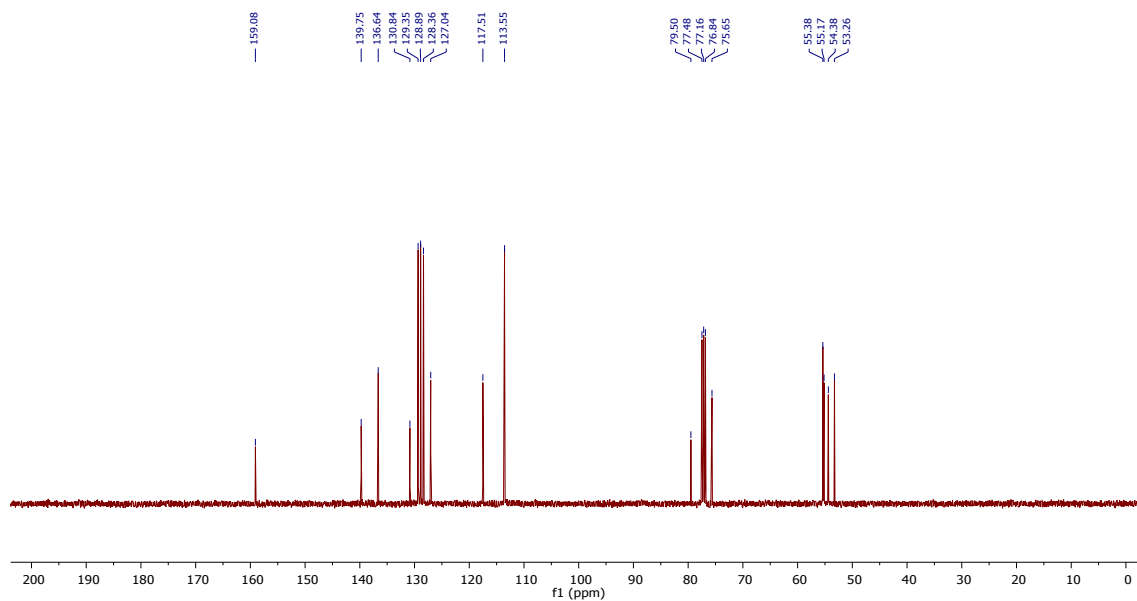

### HPLC trace of *rac-3g*

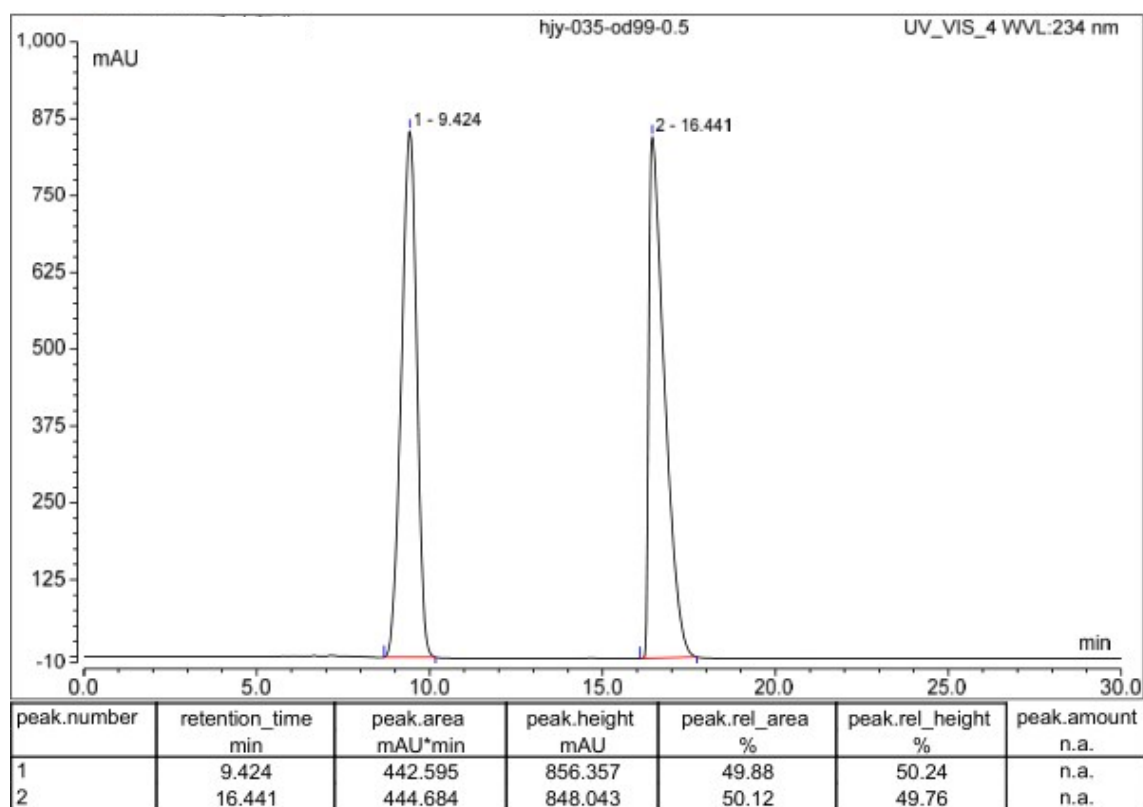

### HPLC trace of 3g

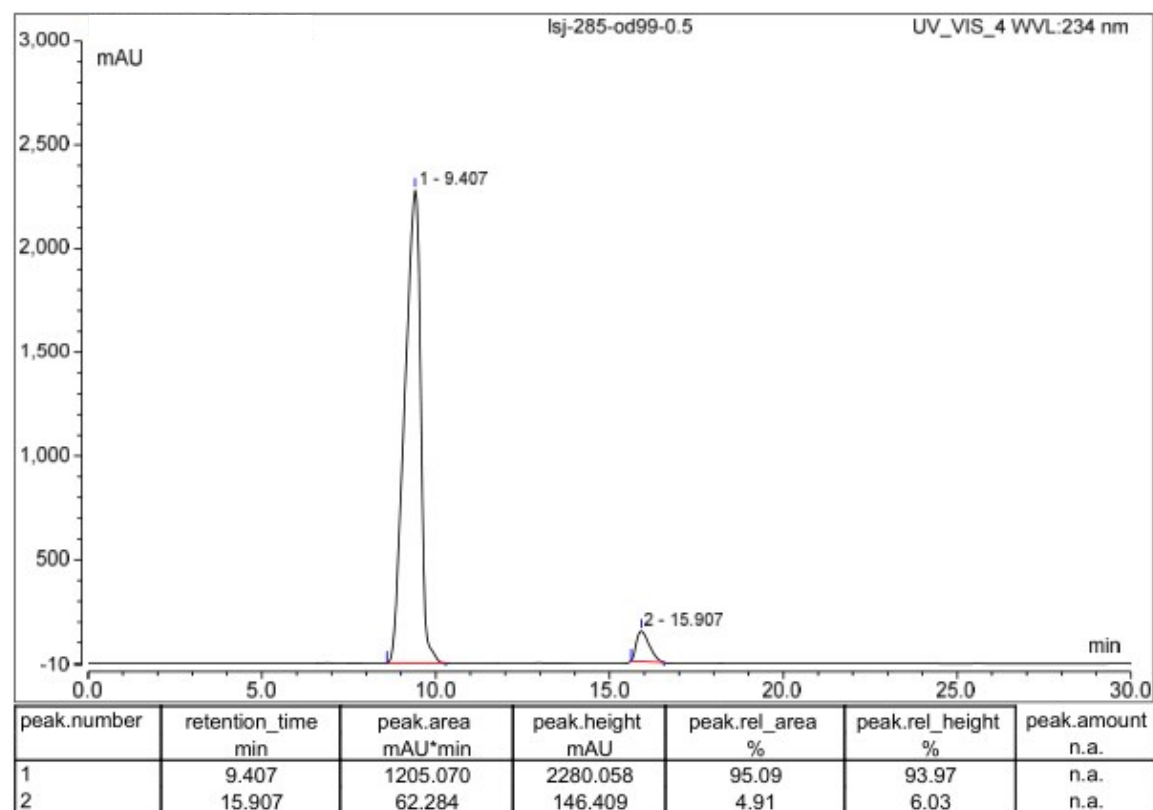

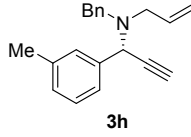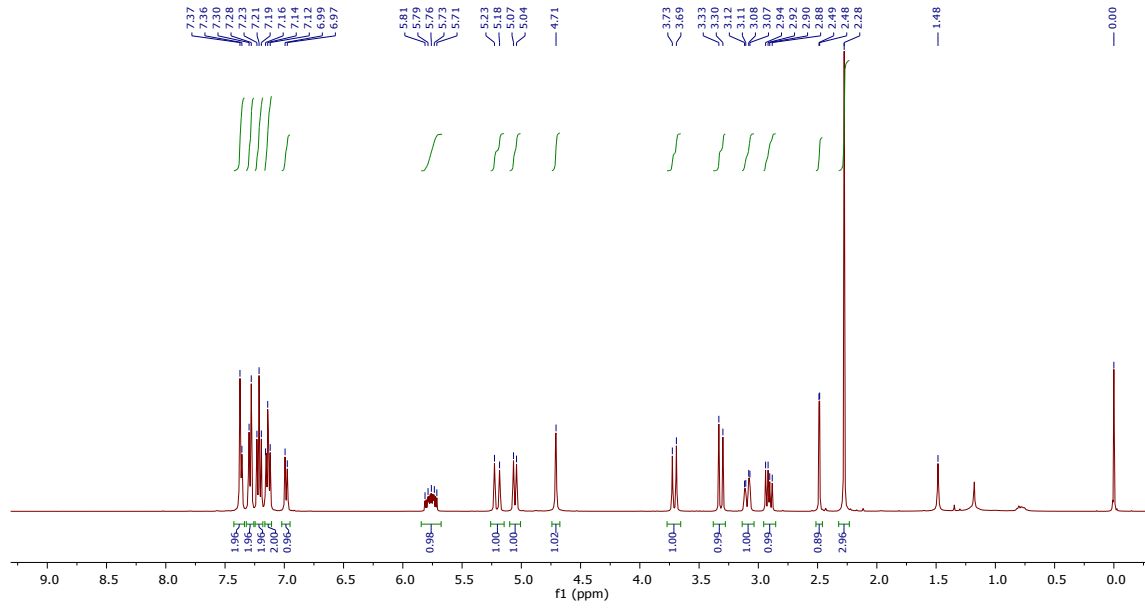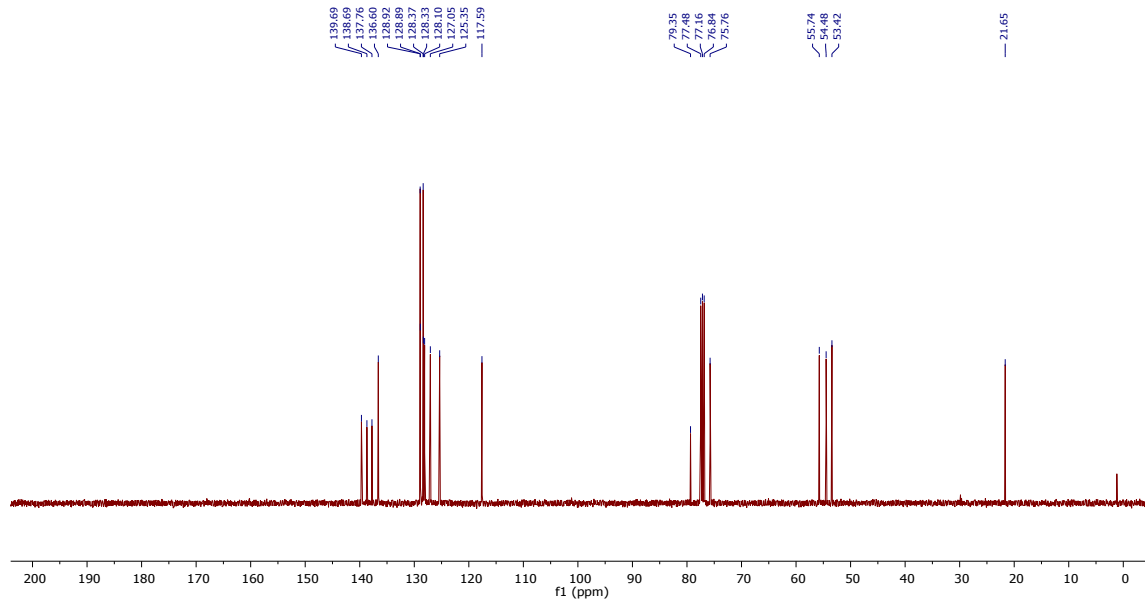

### HPLC trace of *rac*-3h

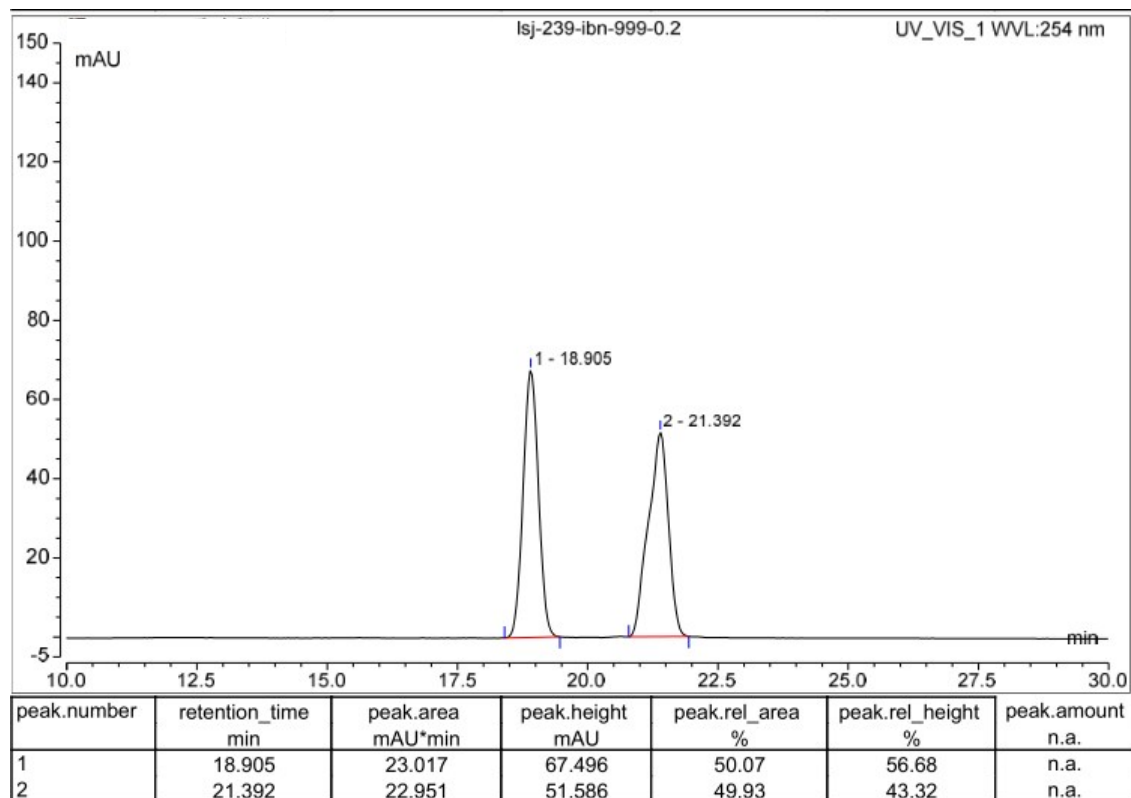

### HPLC trace of 3h

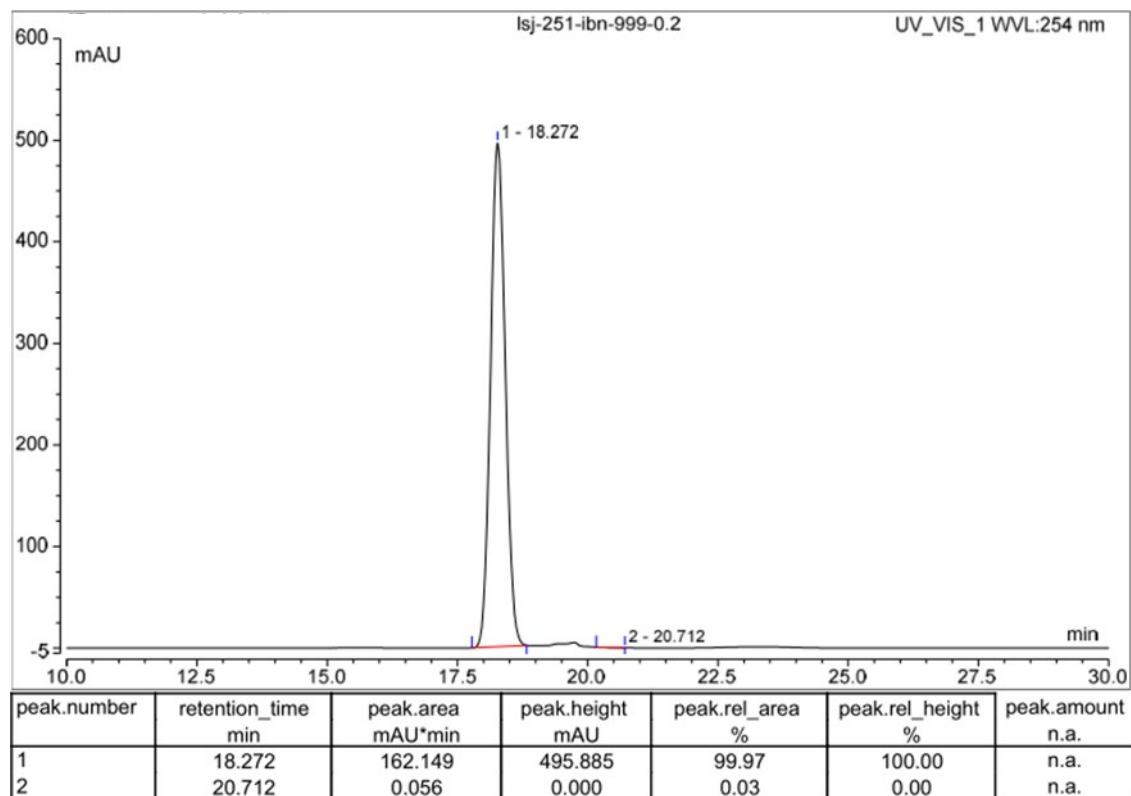

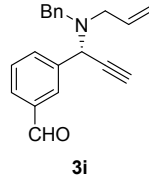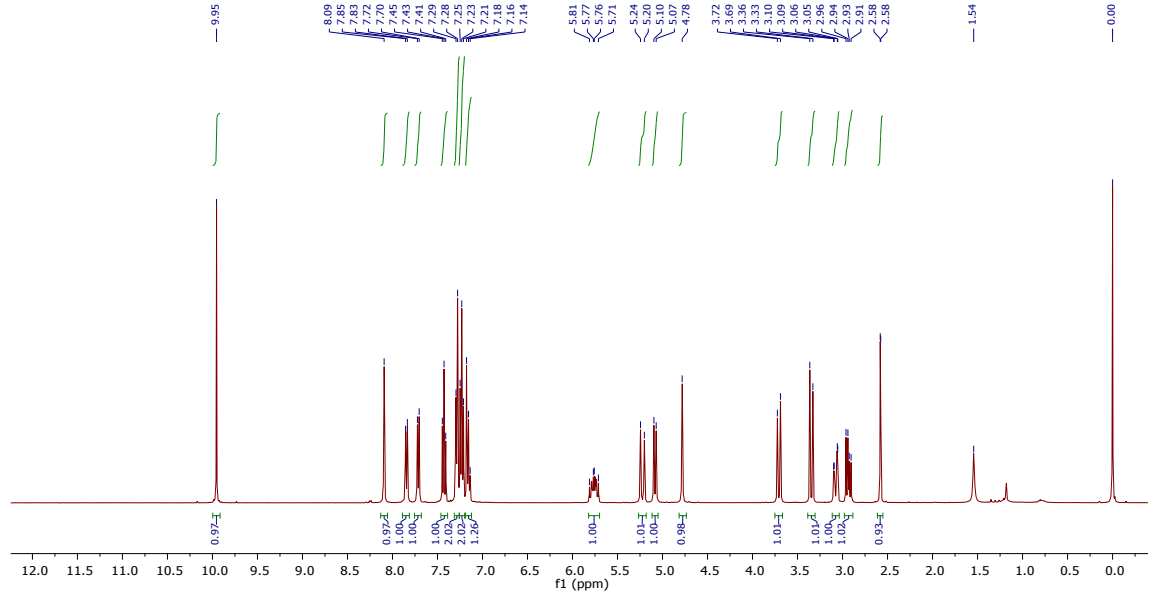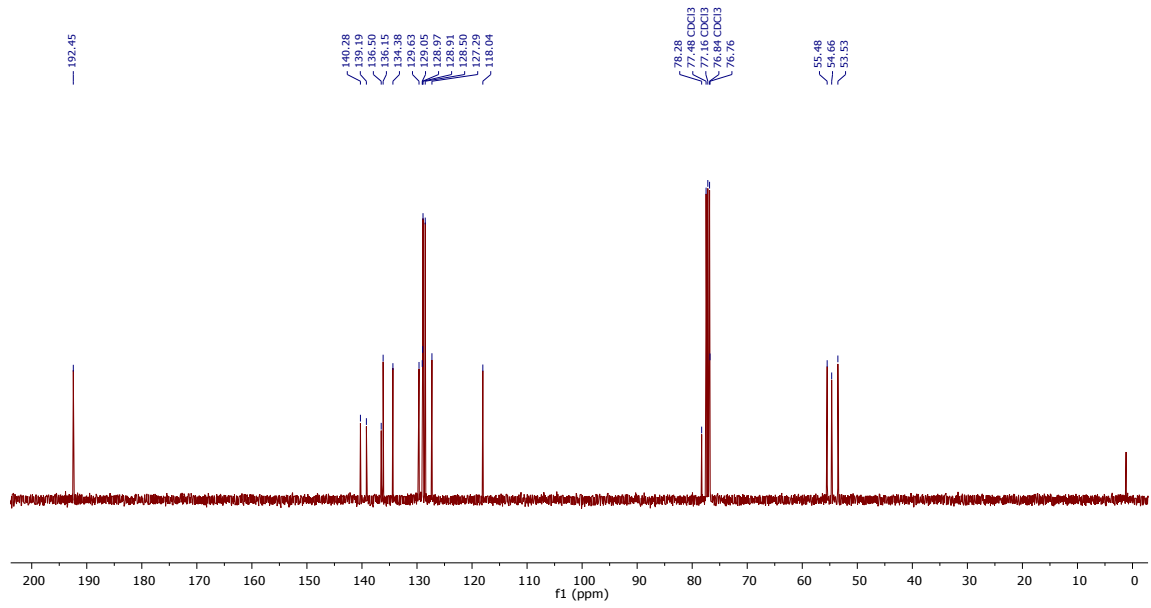



### HPLC trace of *rac-3i*

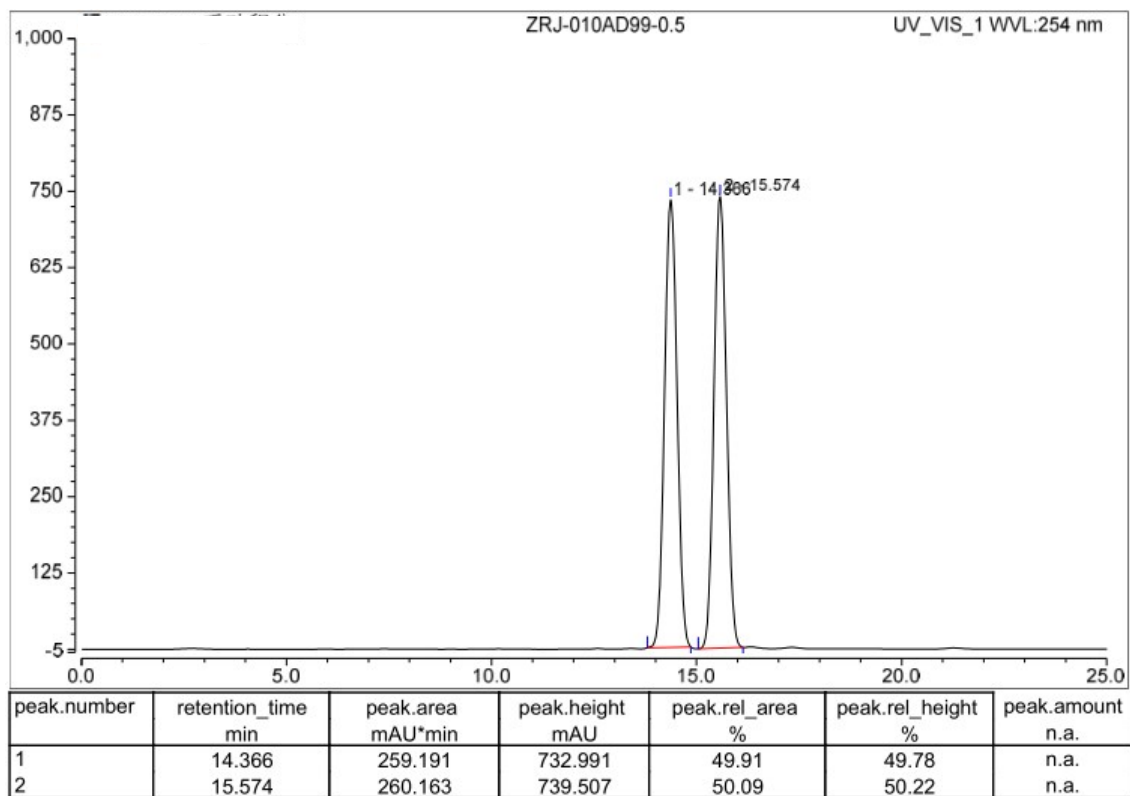

### HPLC trace of *3i*

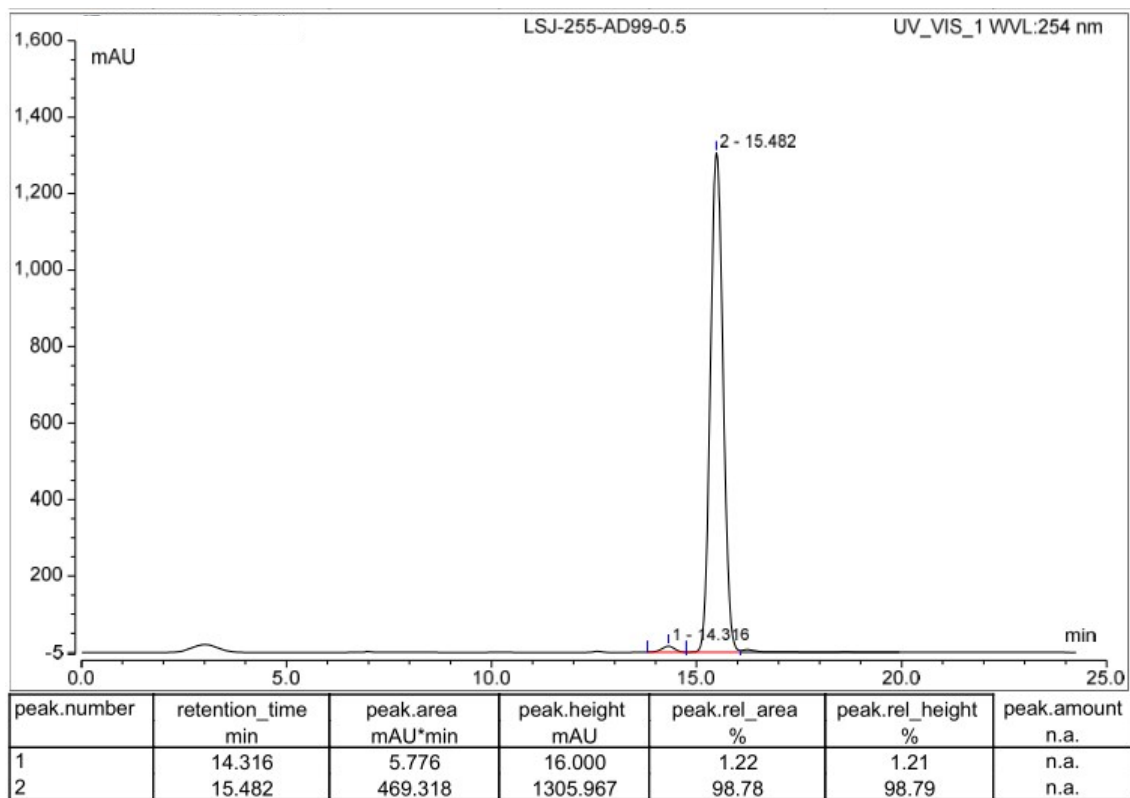

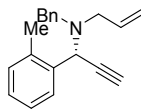

3j

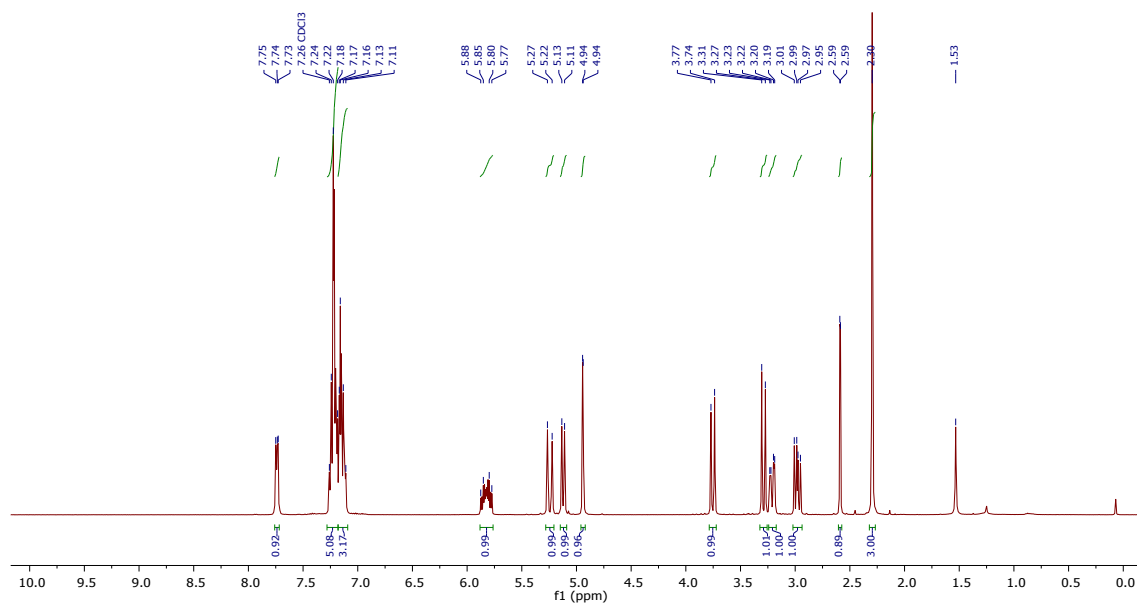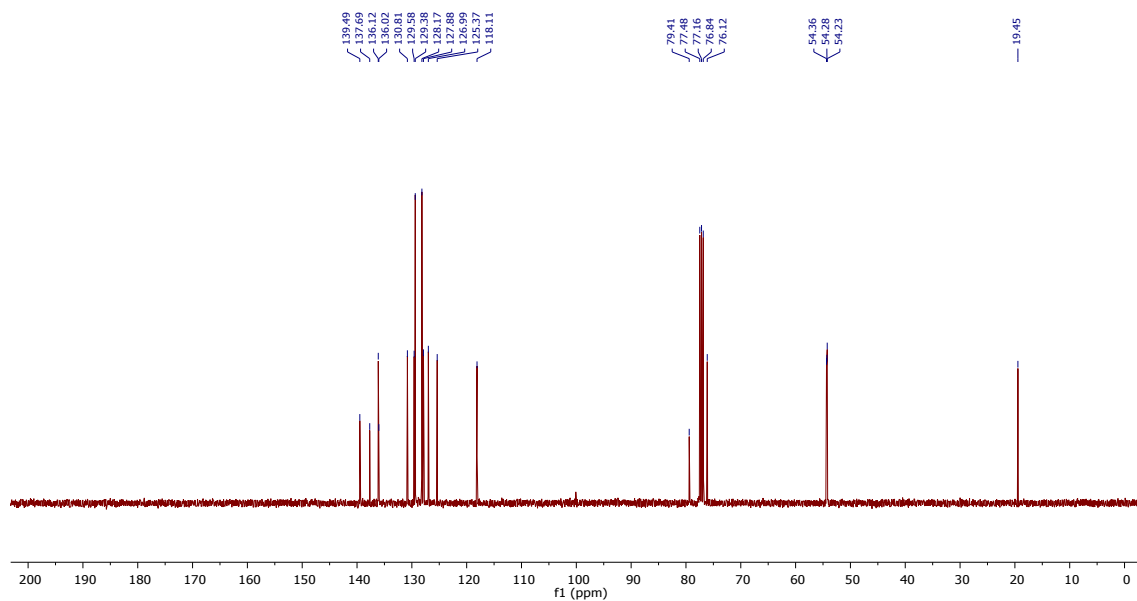

### HPLC trace of *rac-3j*

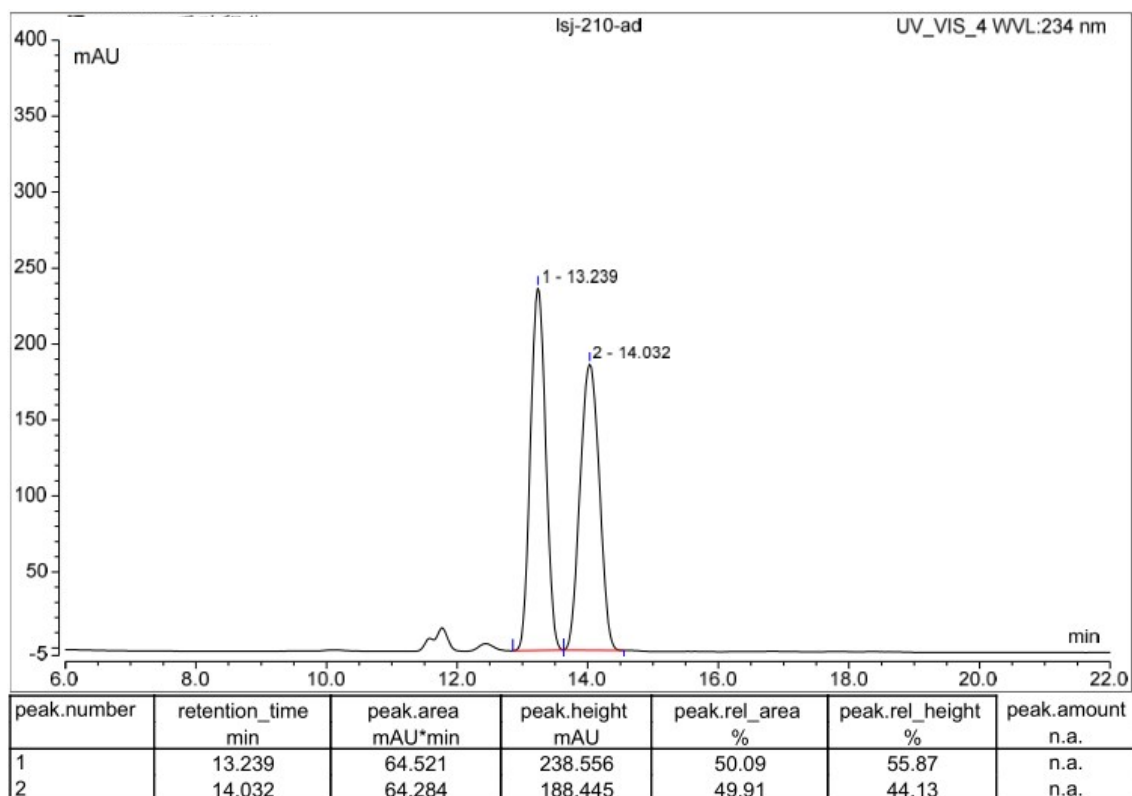

### HPLC trace of *3j*

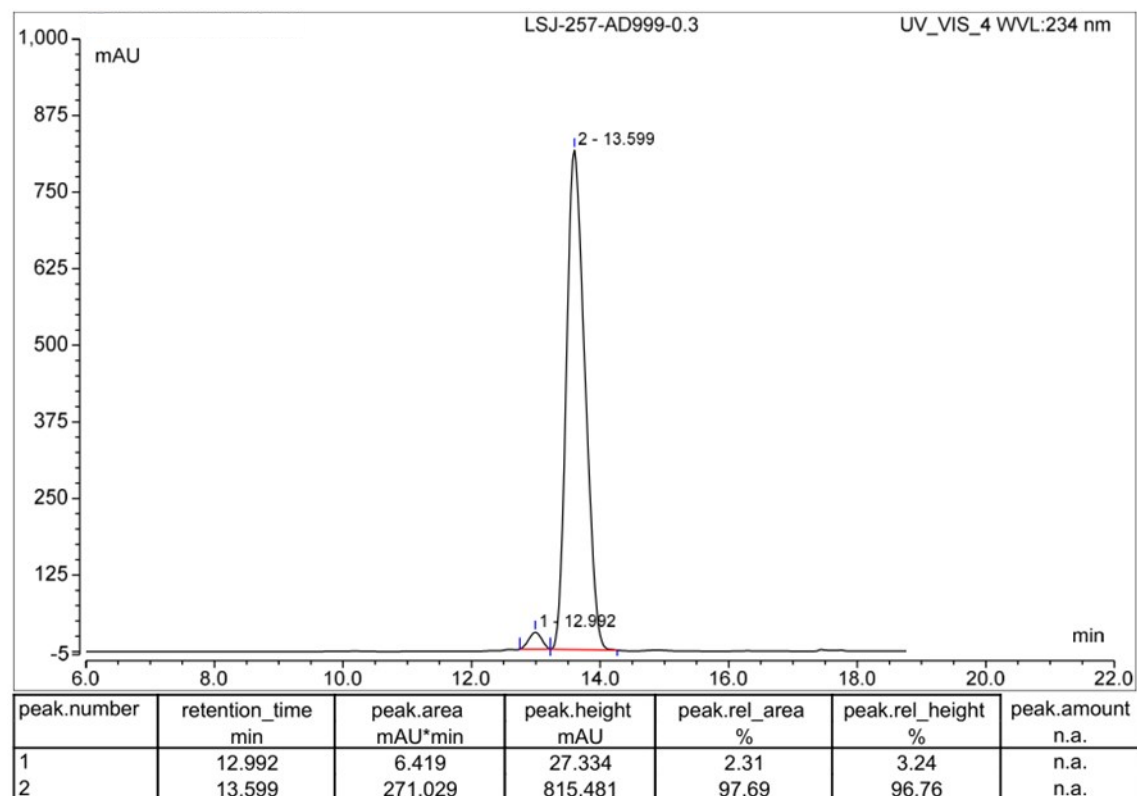

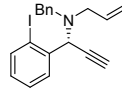

**3k**

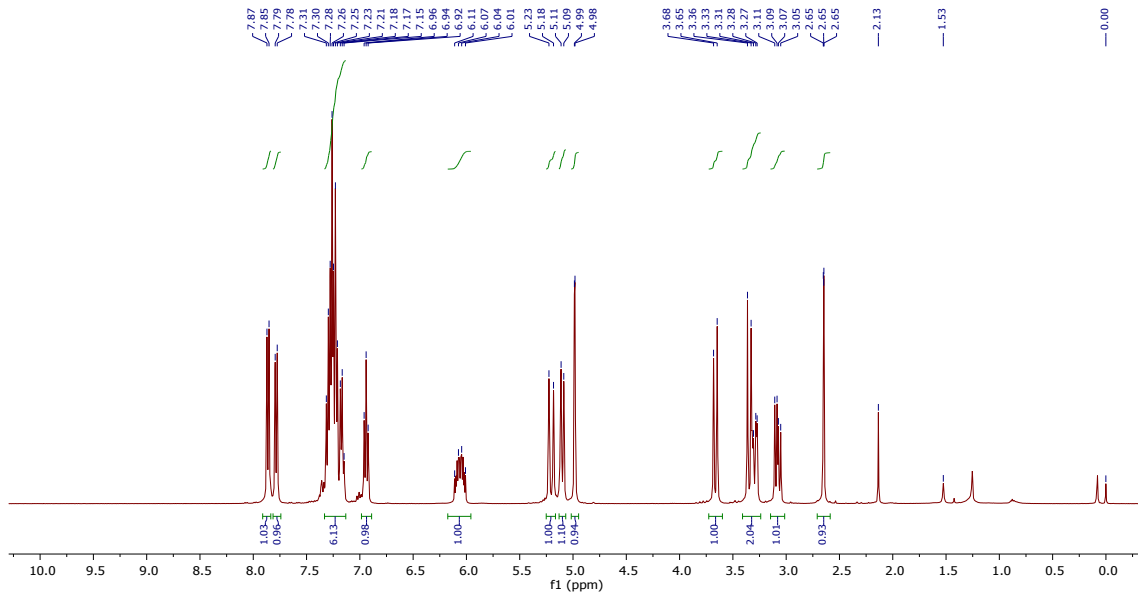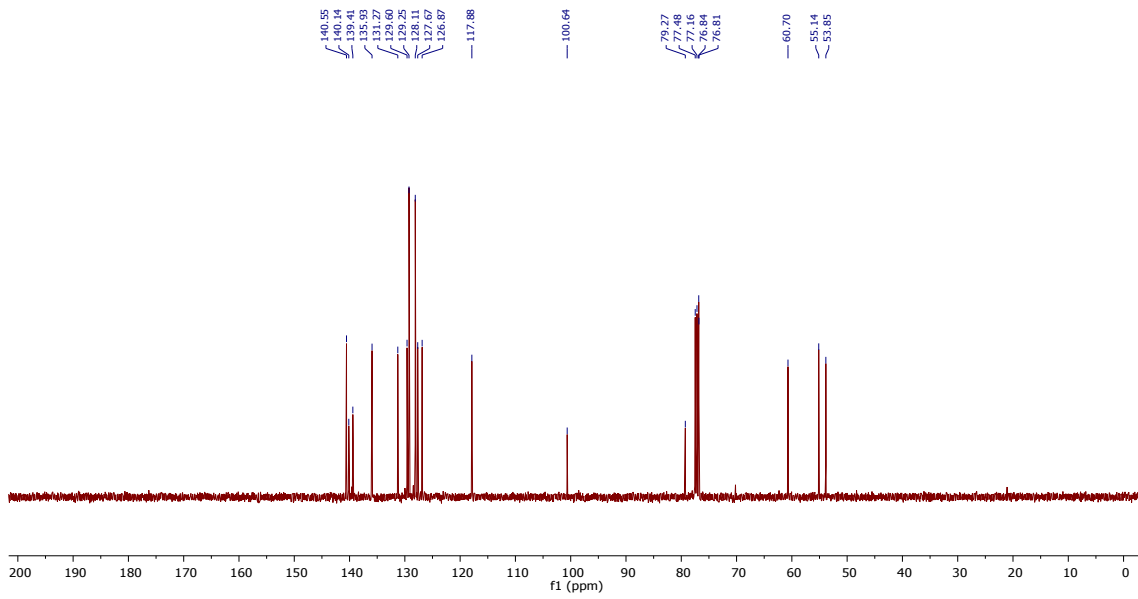

### HPLC trace of *rac-3k*

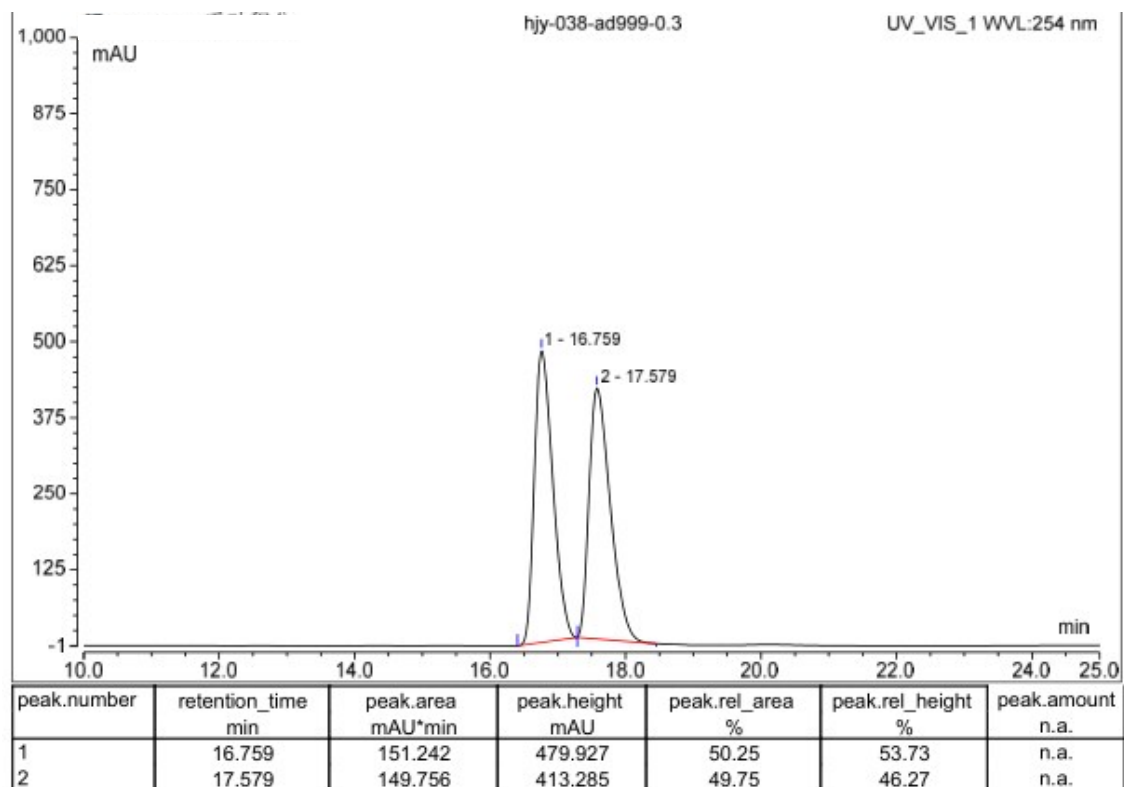

### HPLC trace of 3k

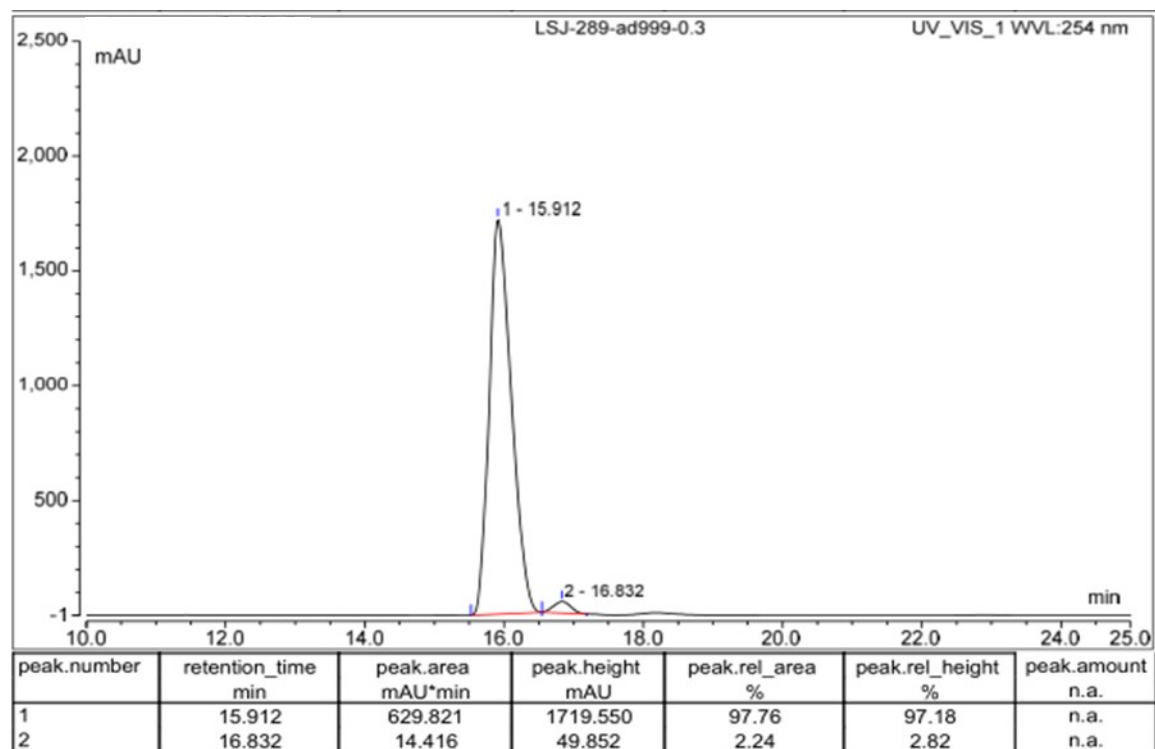

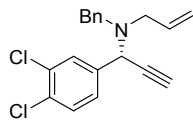

**3I**

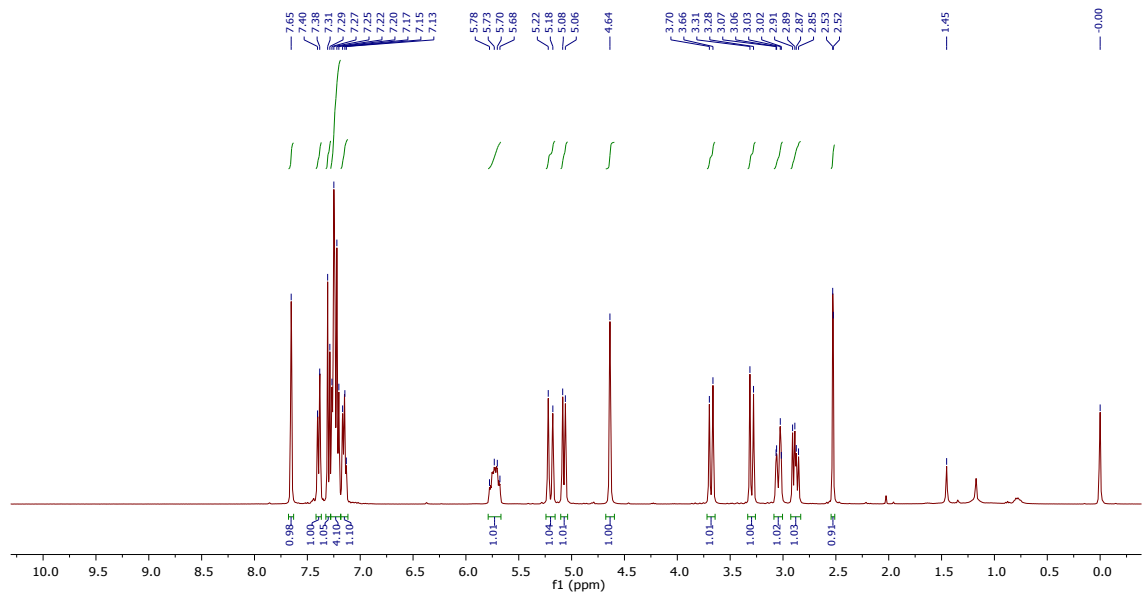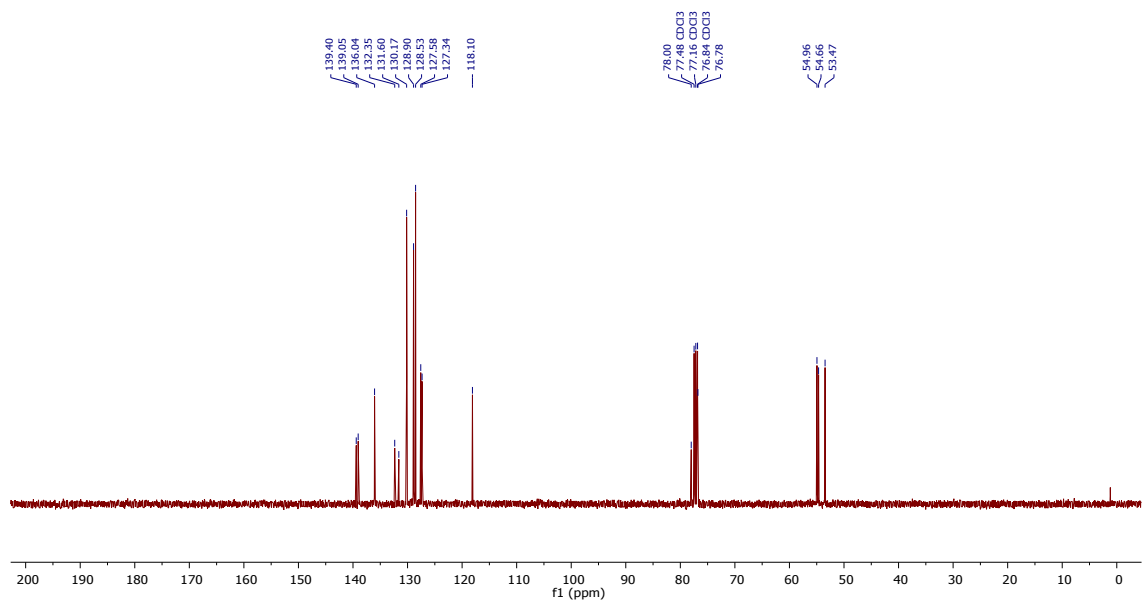

### HPLC trace of *rac*-3l

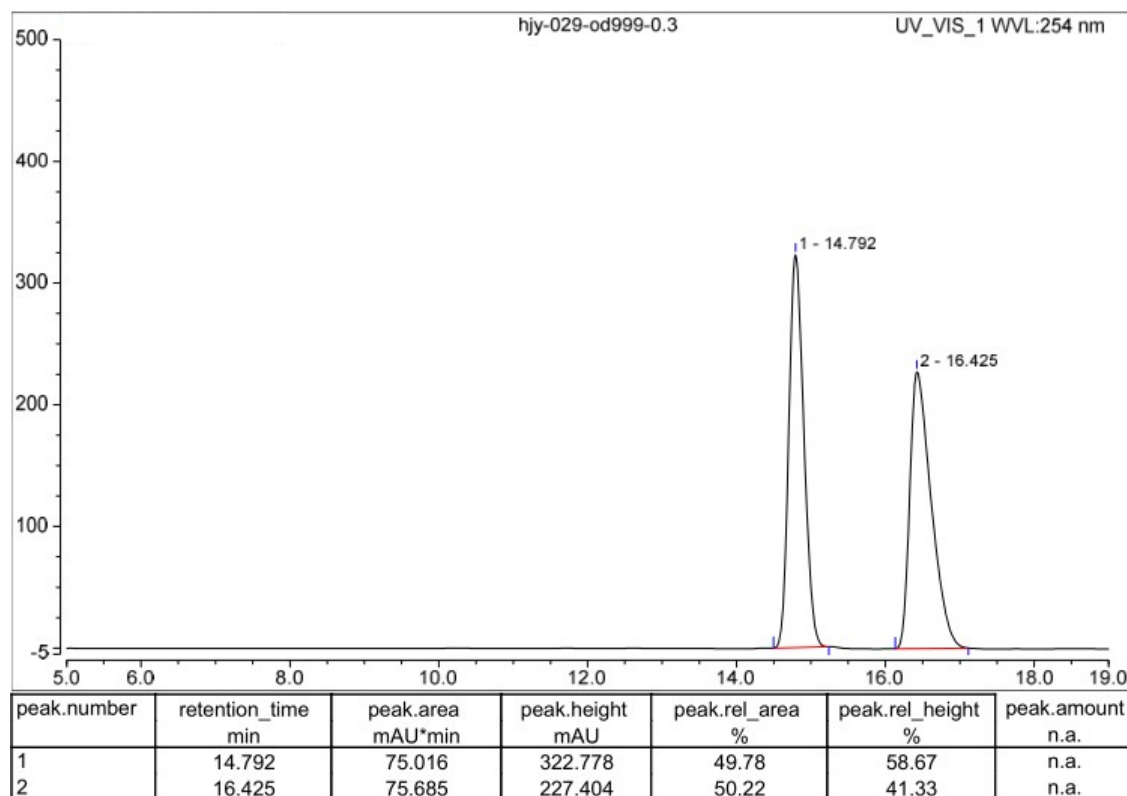

### HPLC trace of 3l

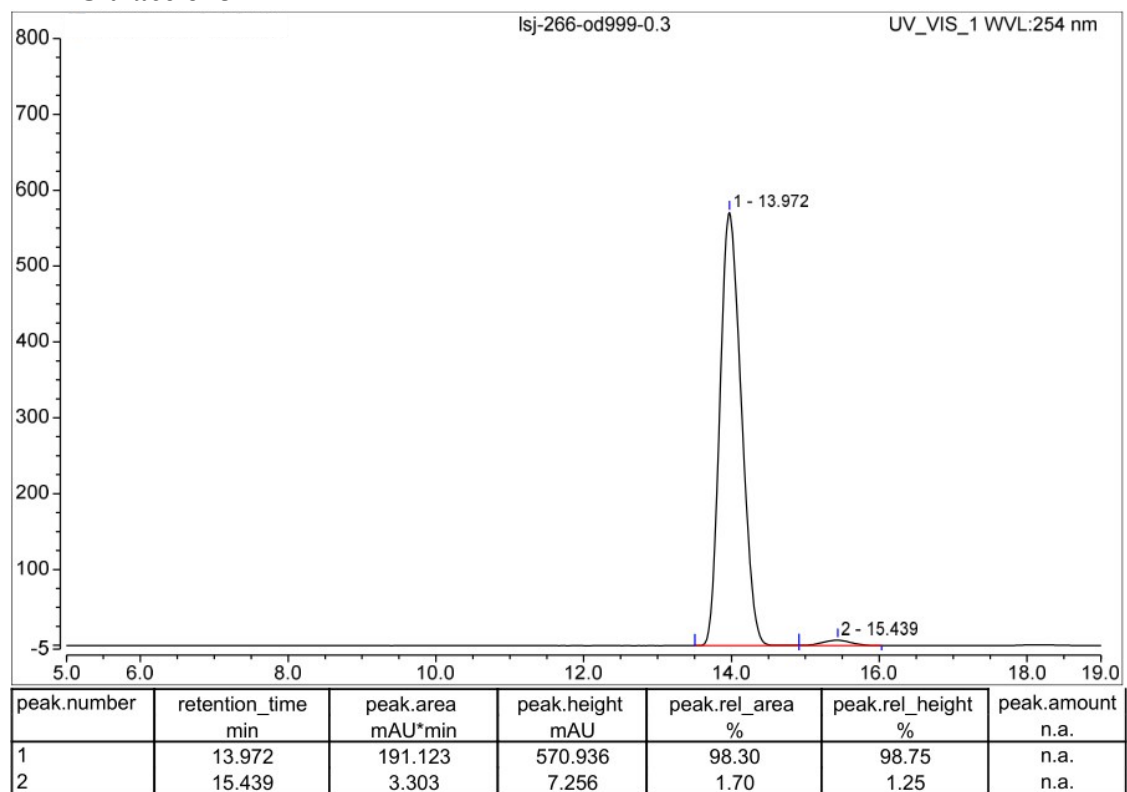

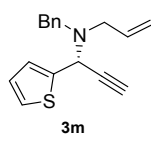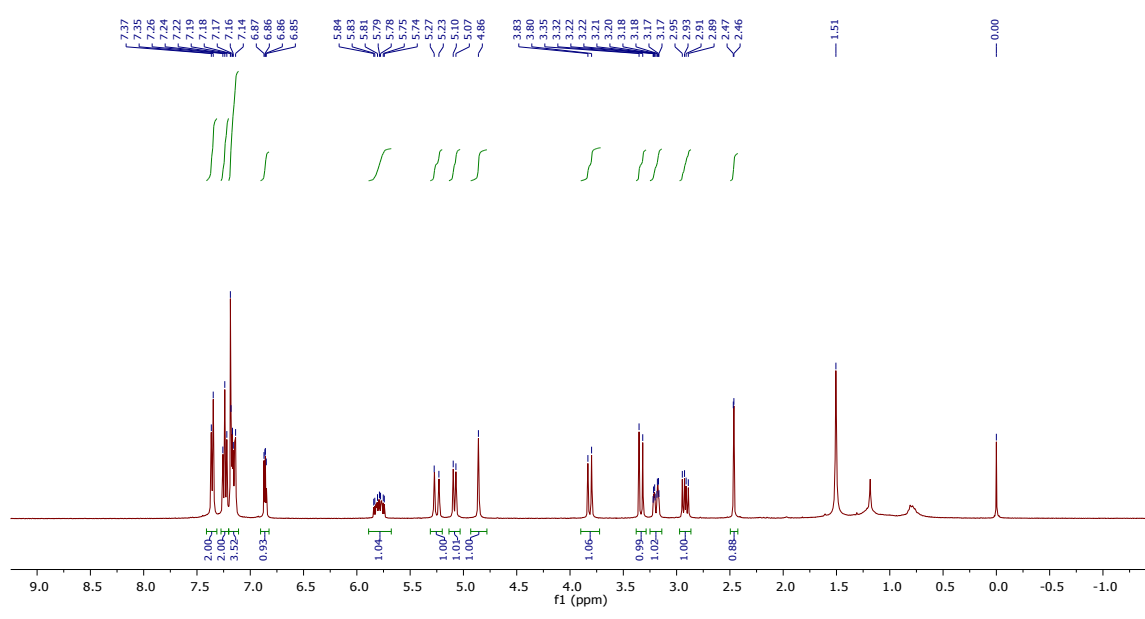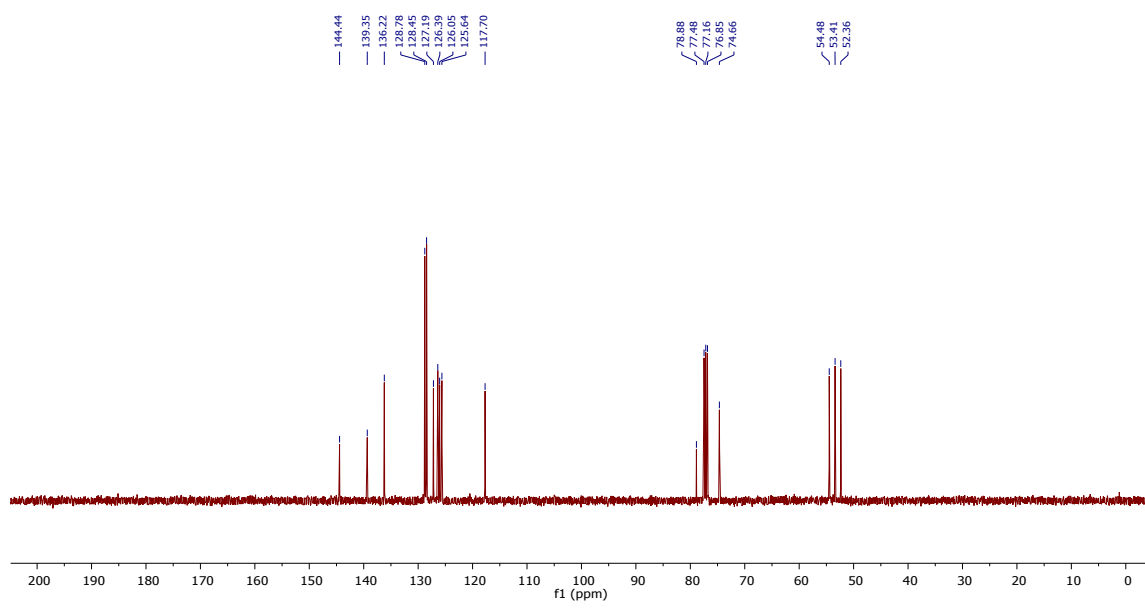



### HPLC trace of *rac-3m*

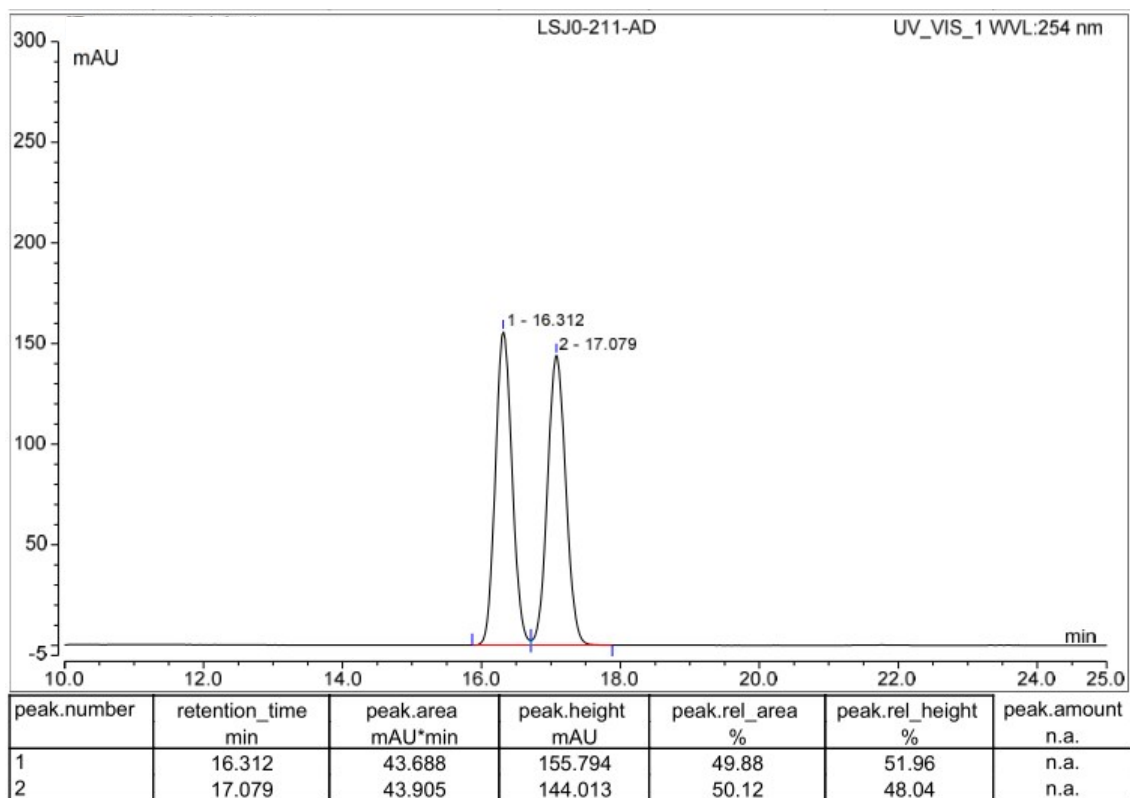

### HPLC trace of 3m

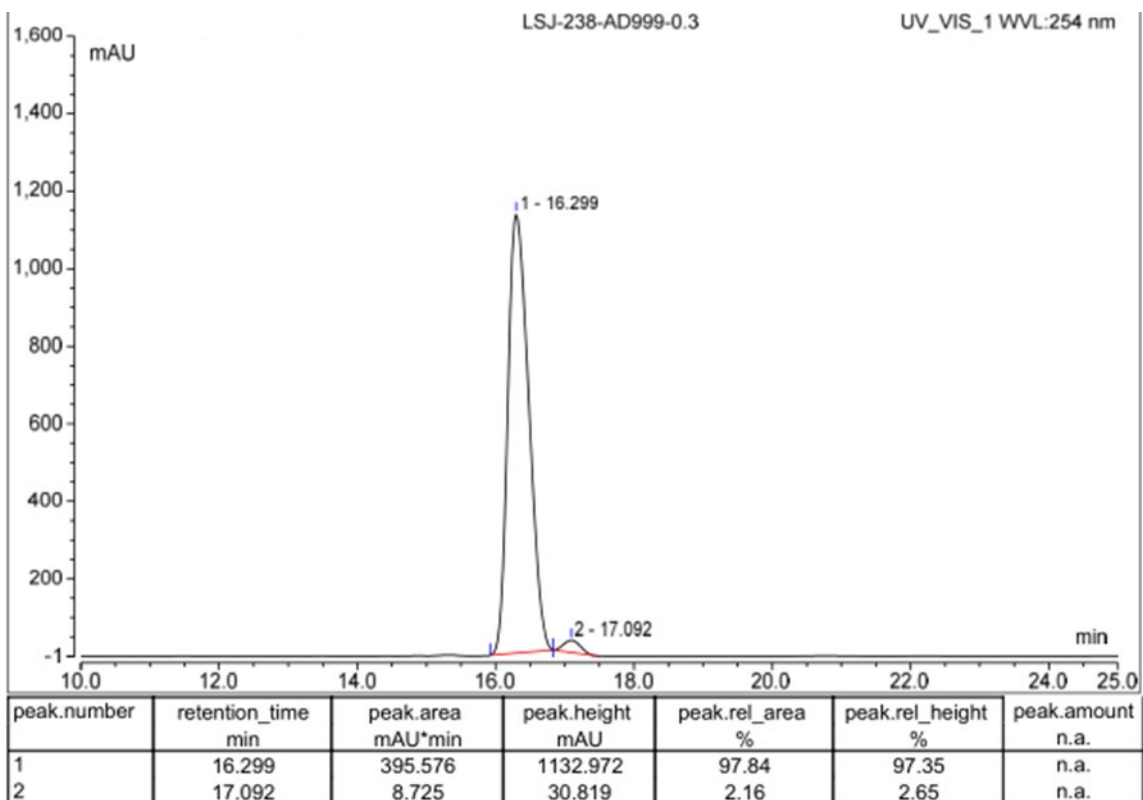

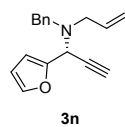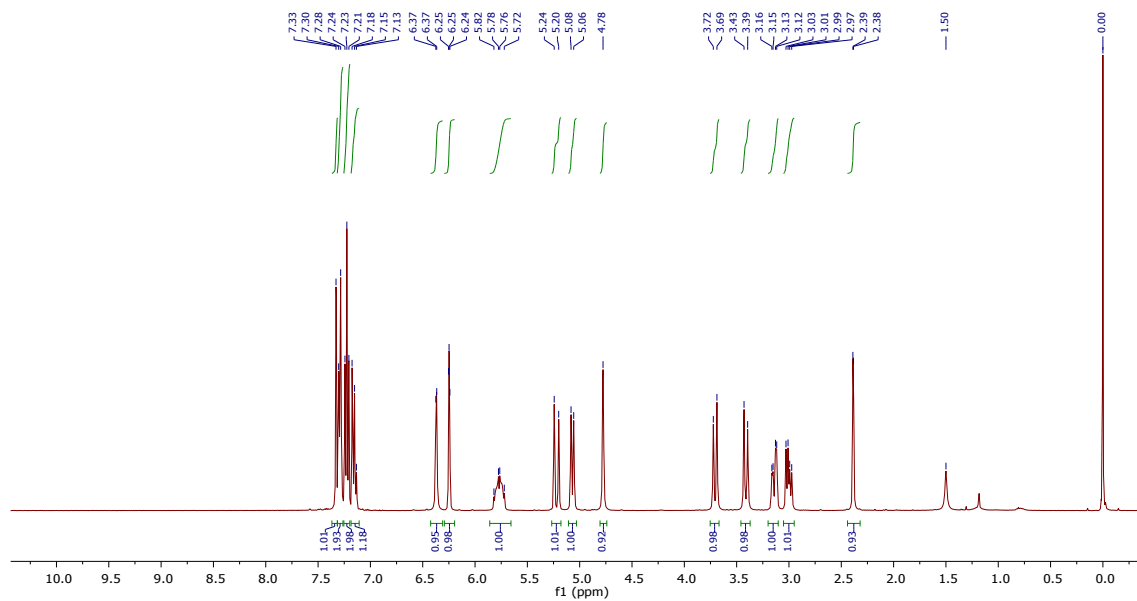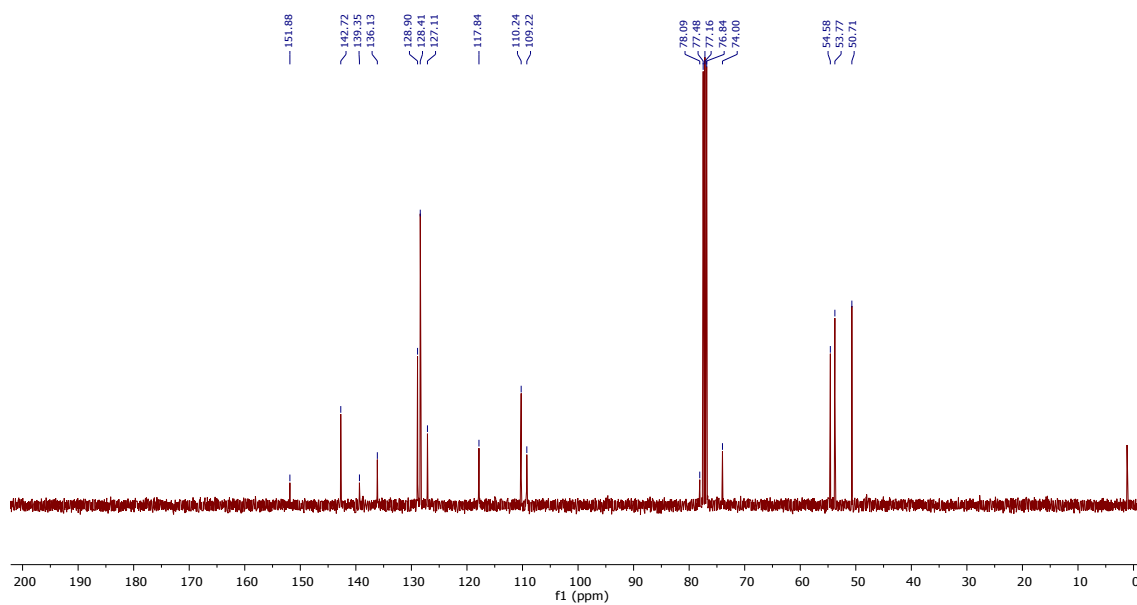

### HPLC trace of *rac*-3n

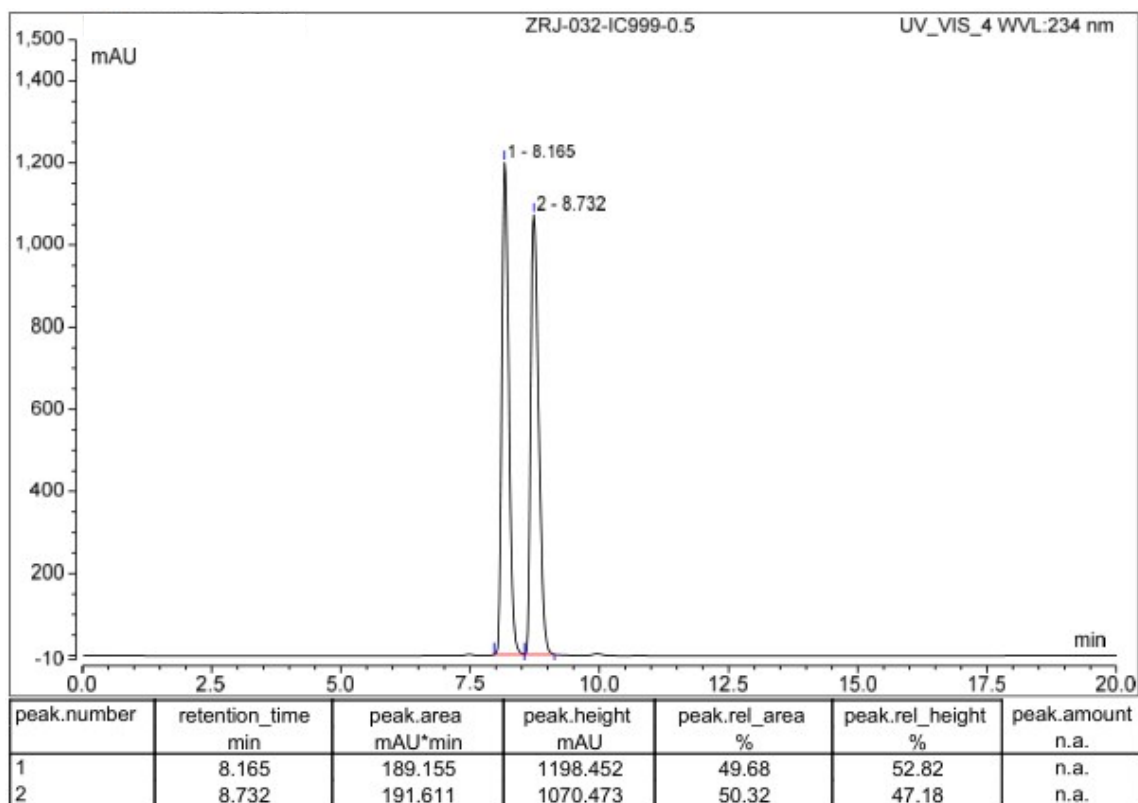

### HPLC trace of 3n

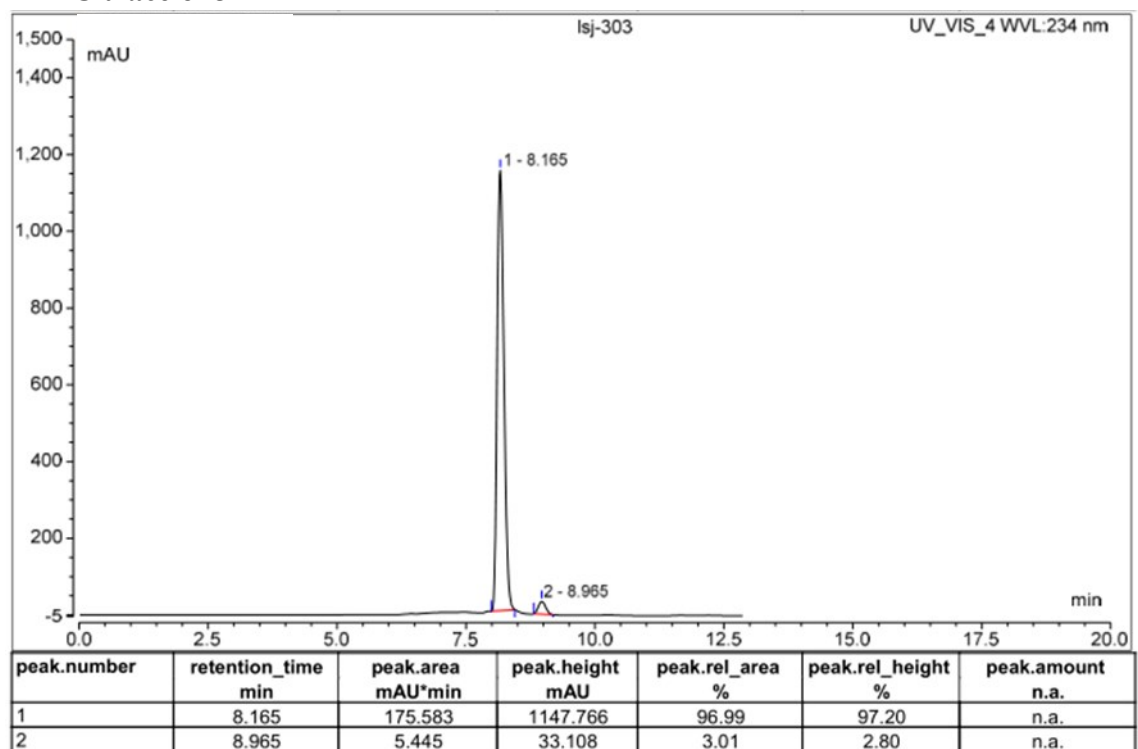

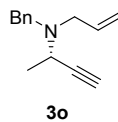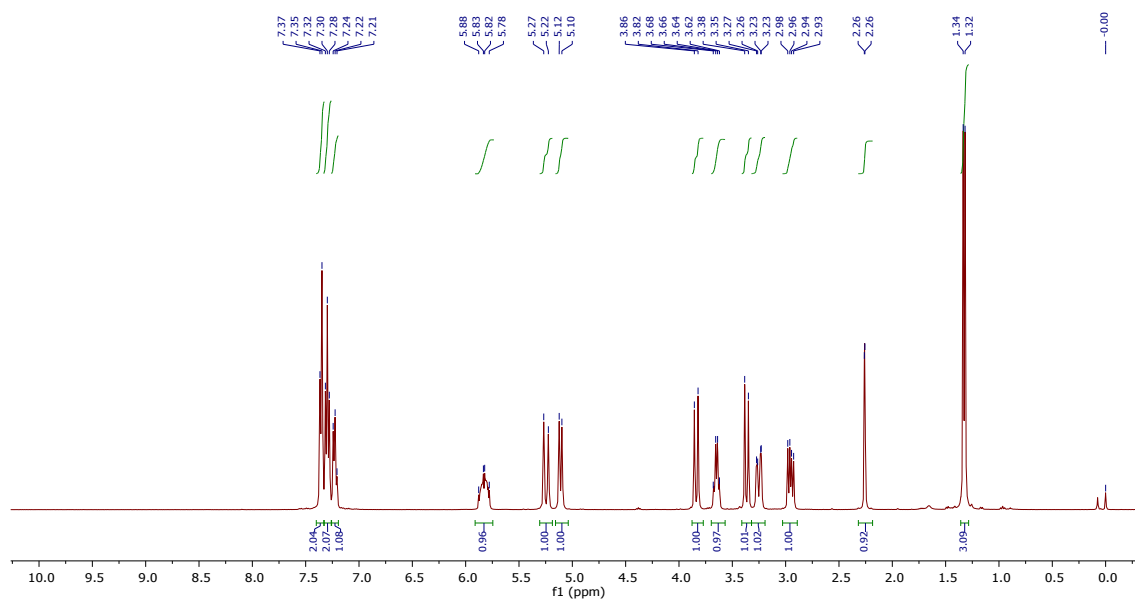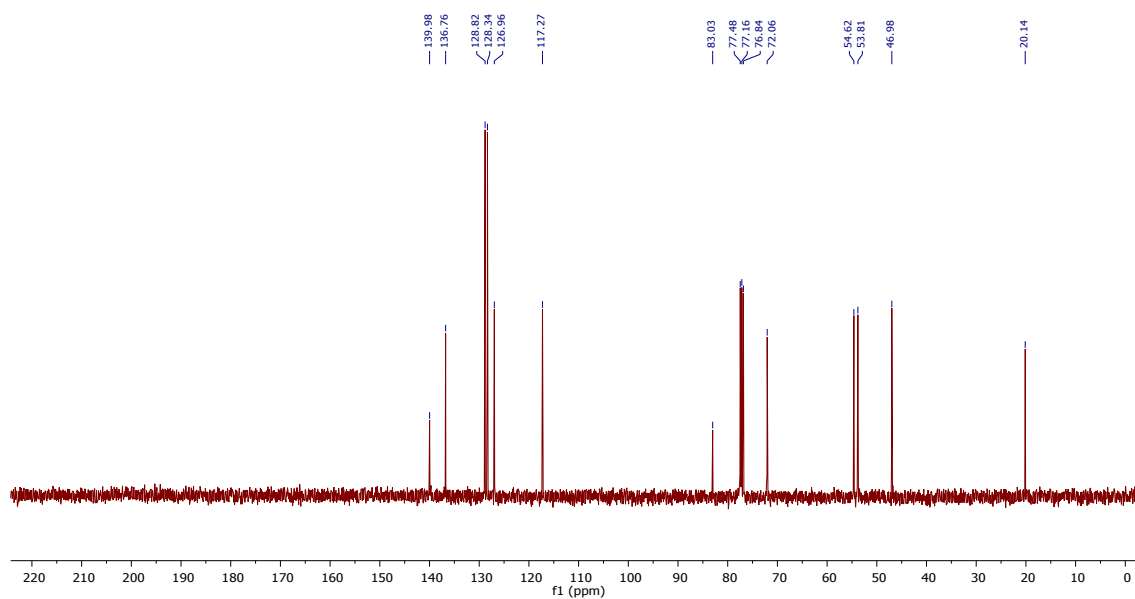

### HPLC trace of *rac-3o*

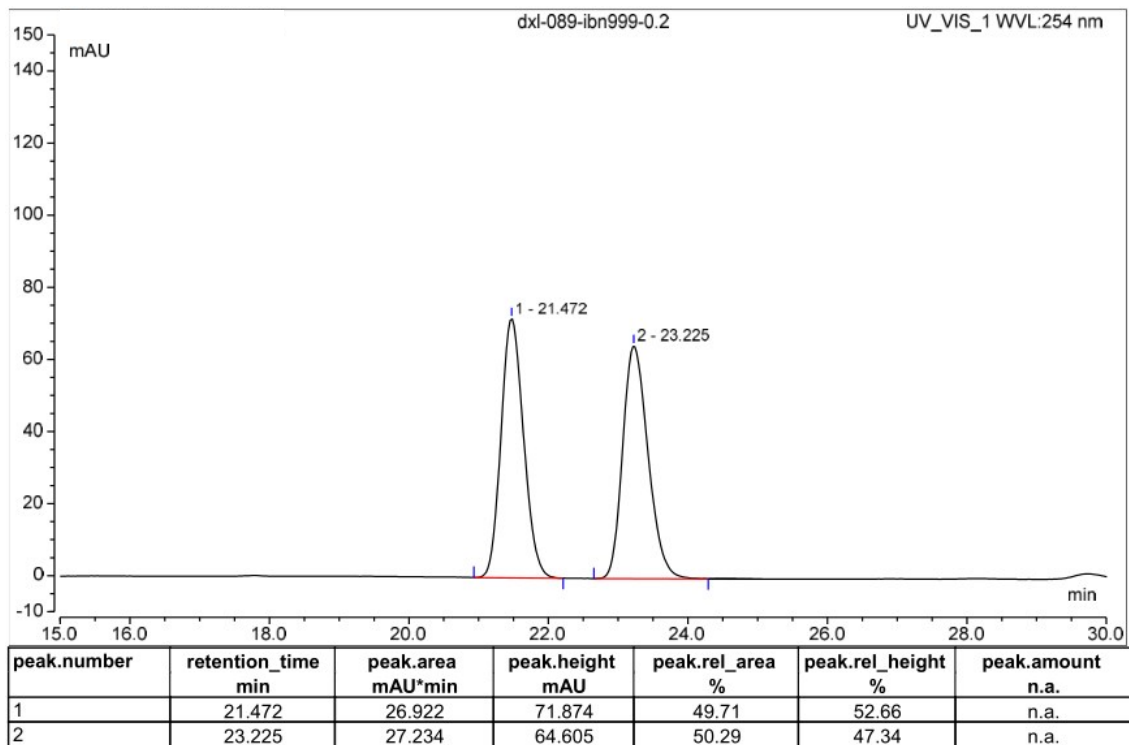

### HPLC trace of *3o*

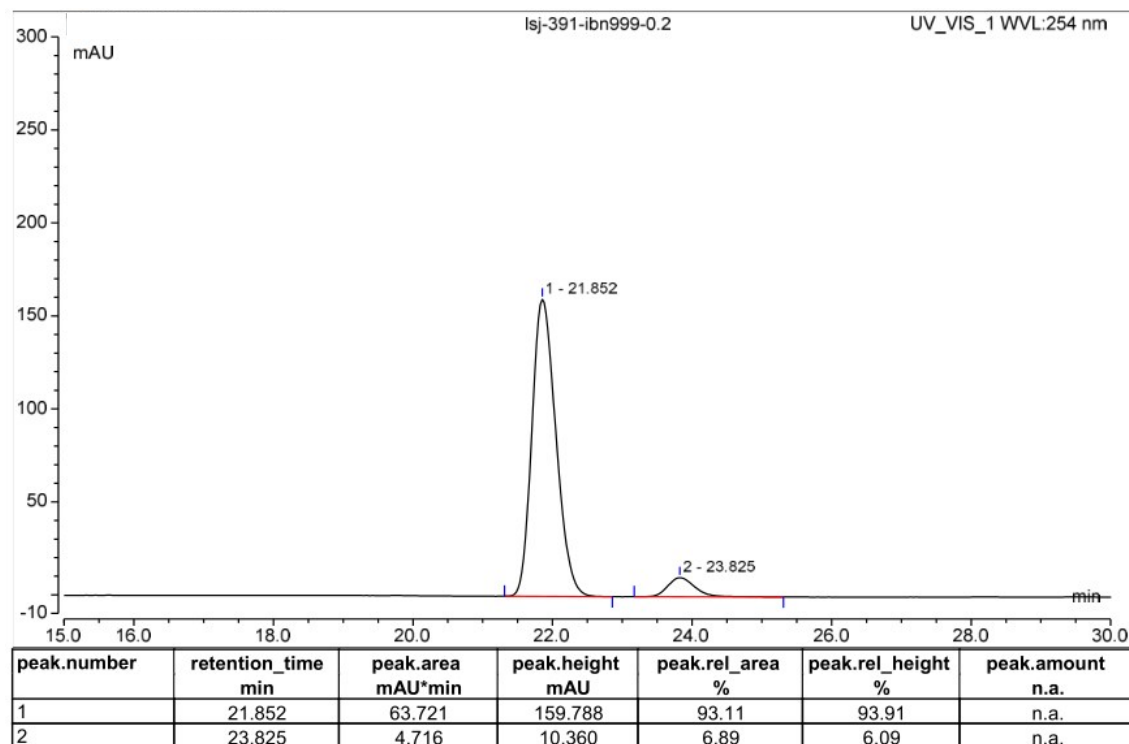

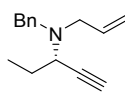

**3p**

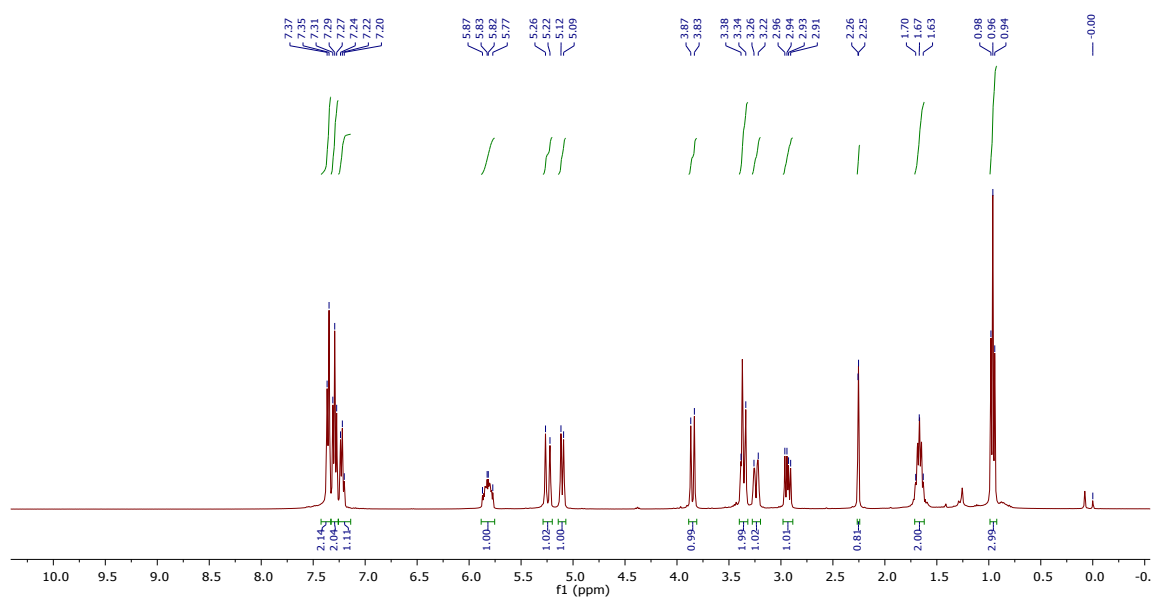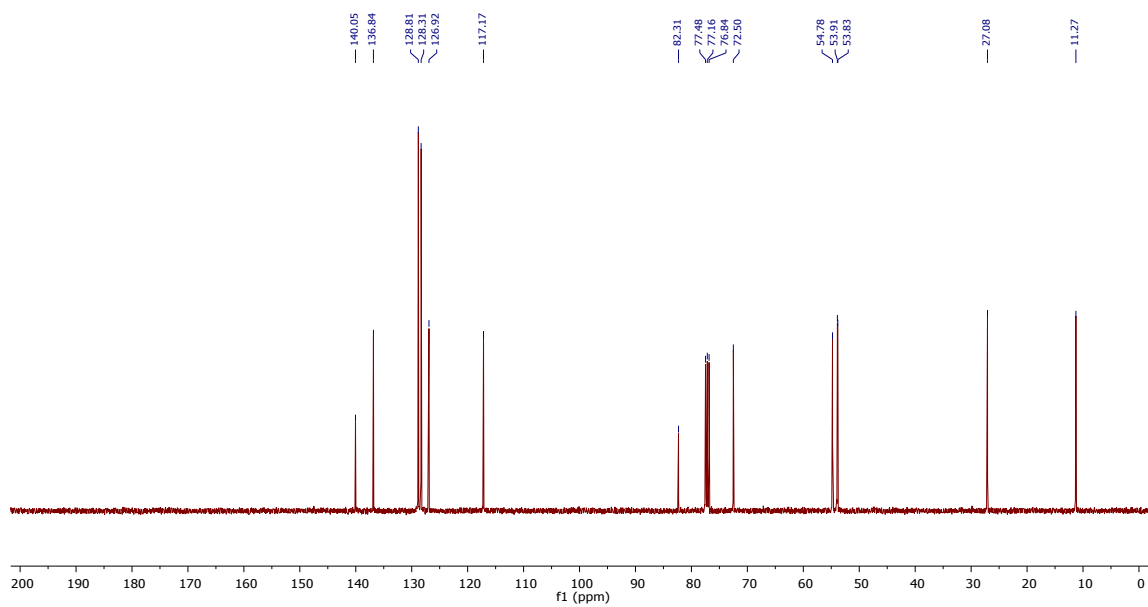

### HPLC trace of *rac*-3p

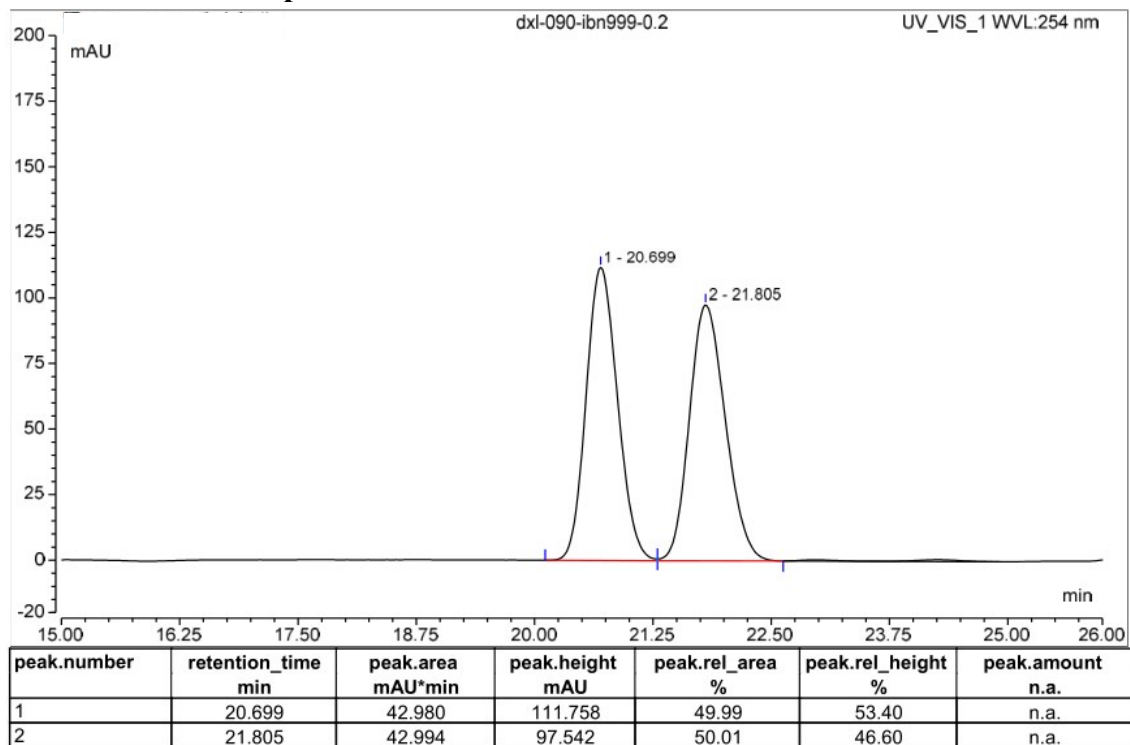

### HPLC trace of 3p

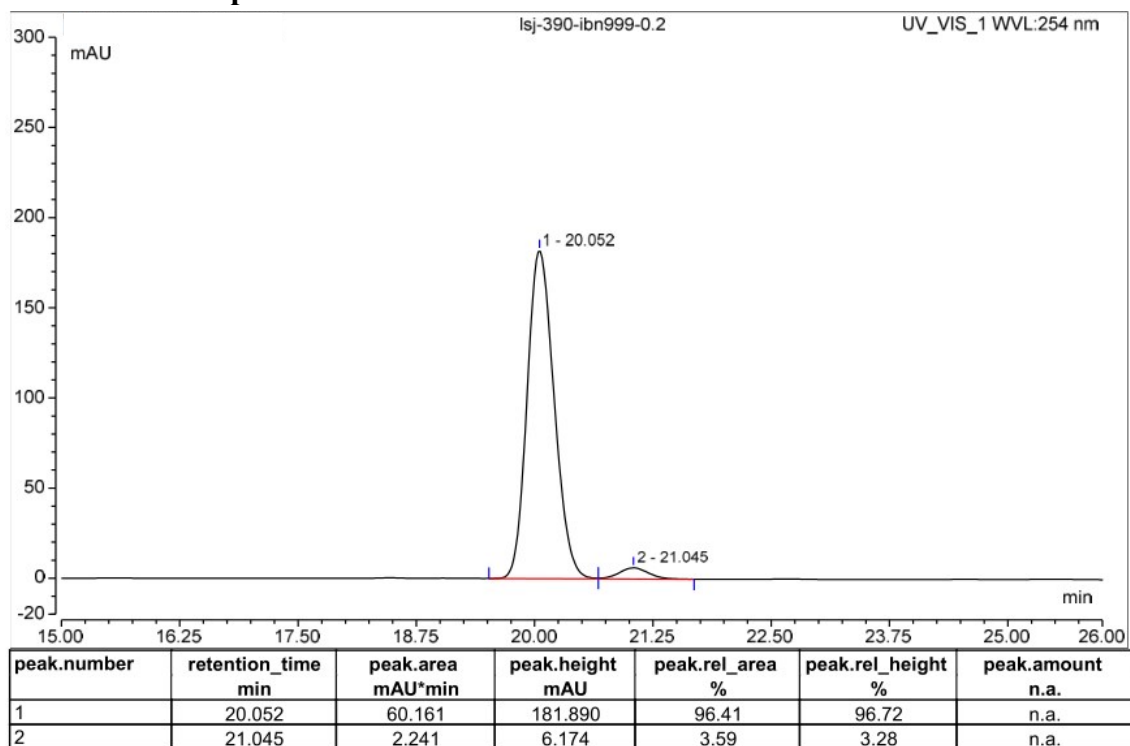

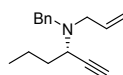

**3q**

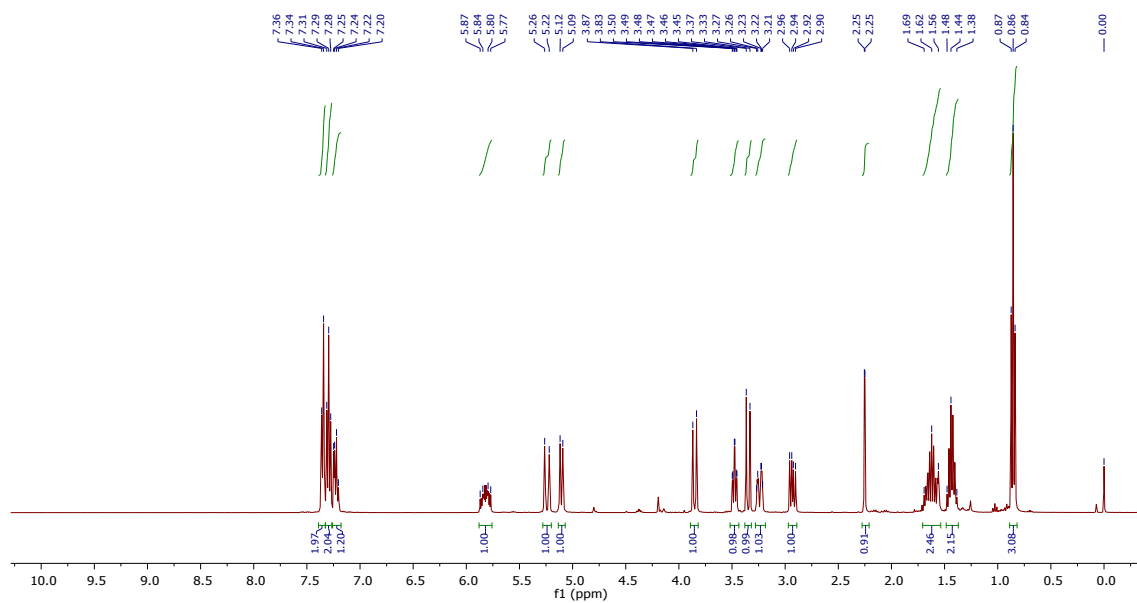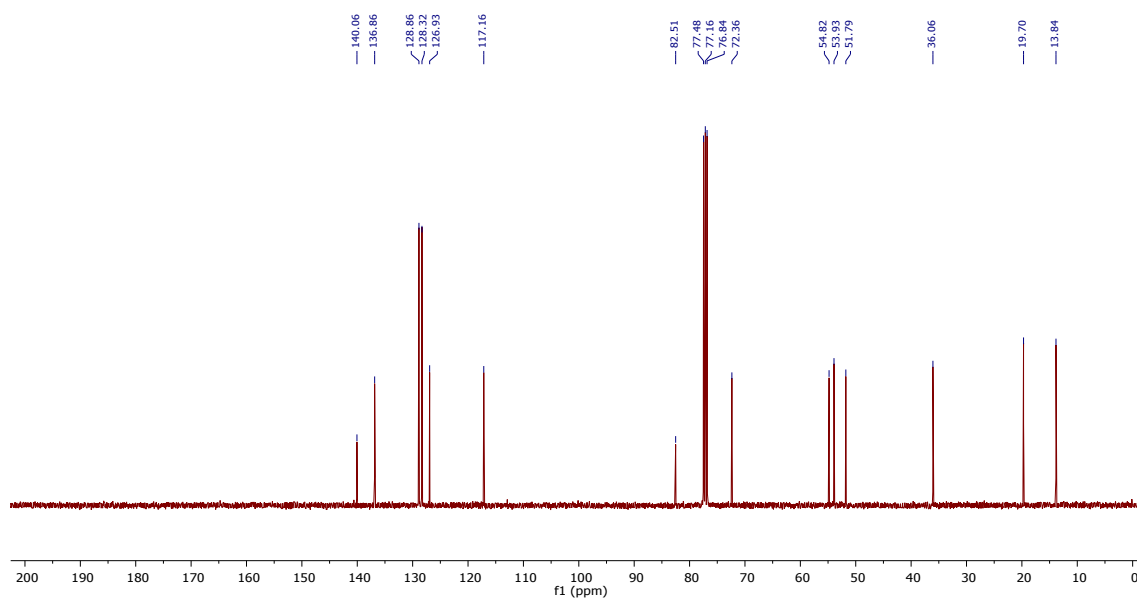



### HPLC trace of *rac-3q*

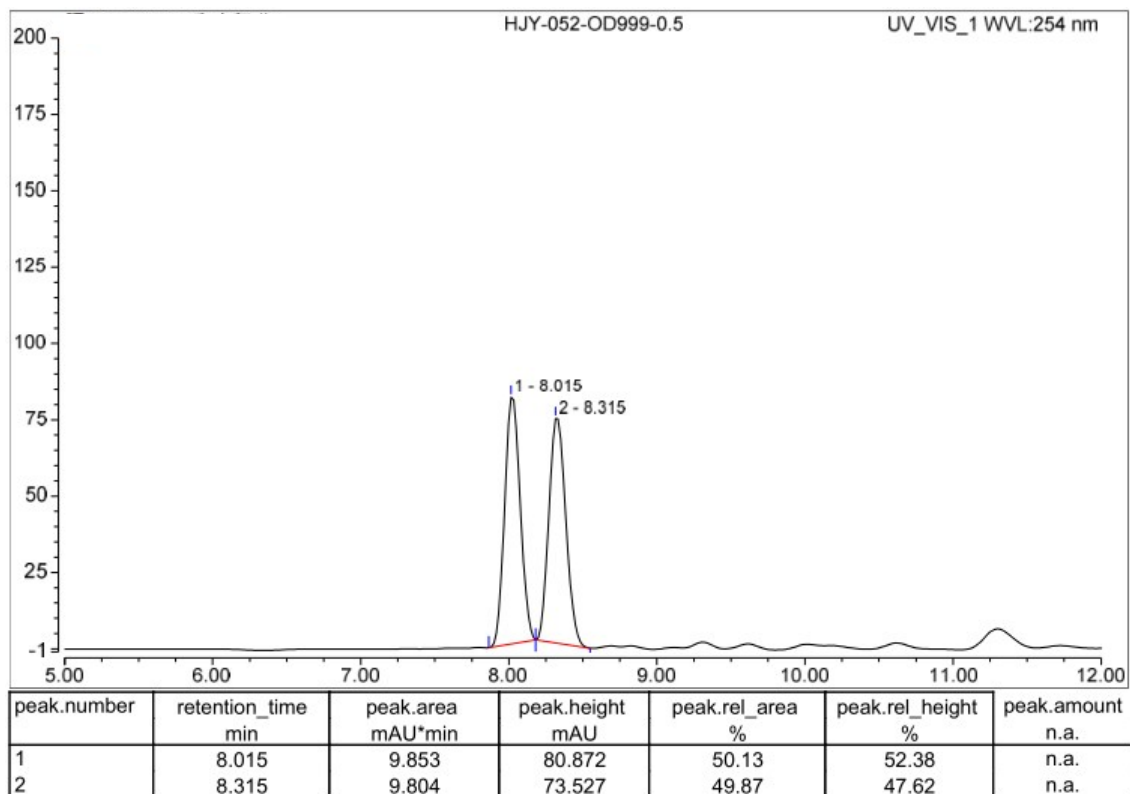

### HPLC trace of *3q*

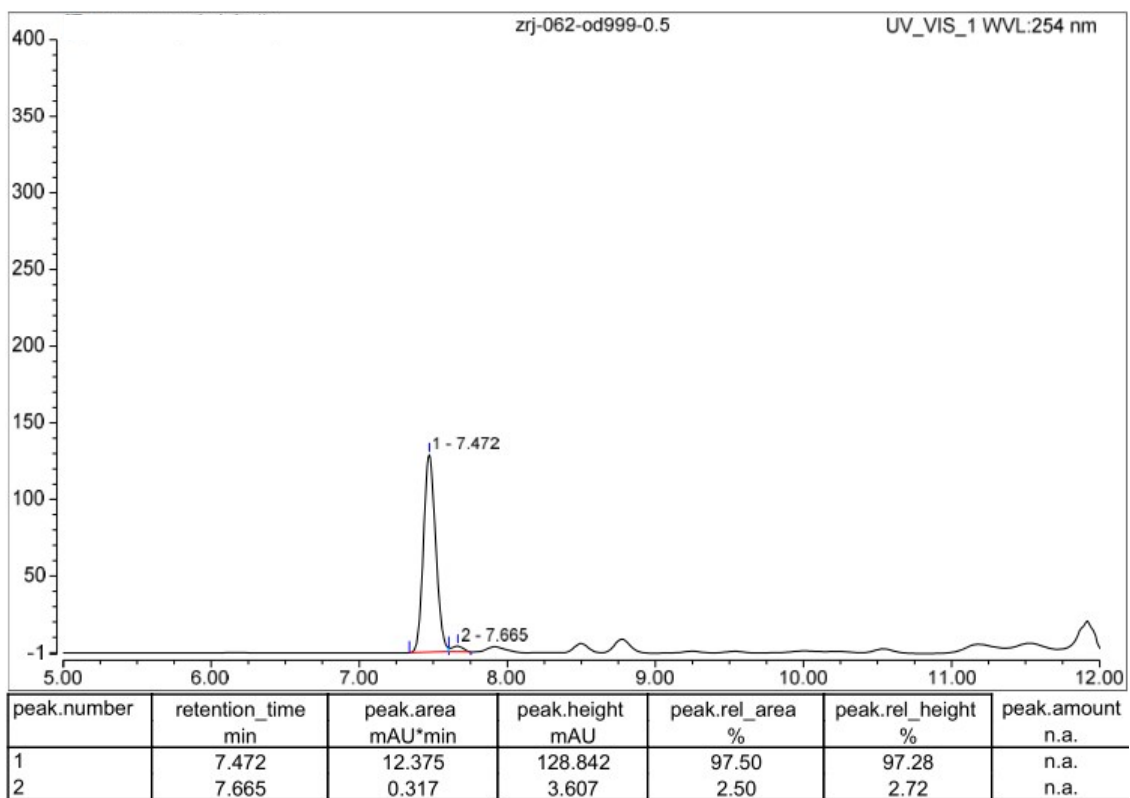

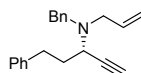

**3r**

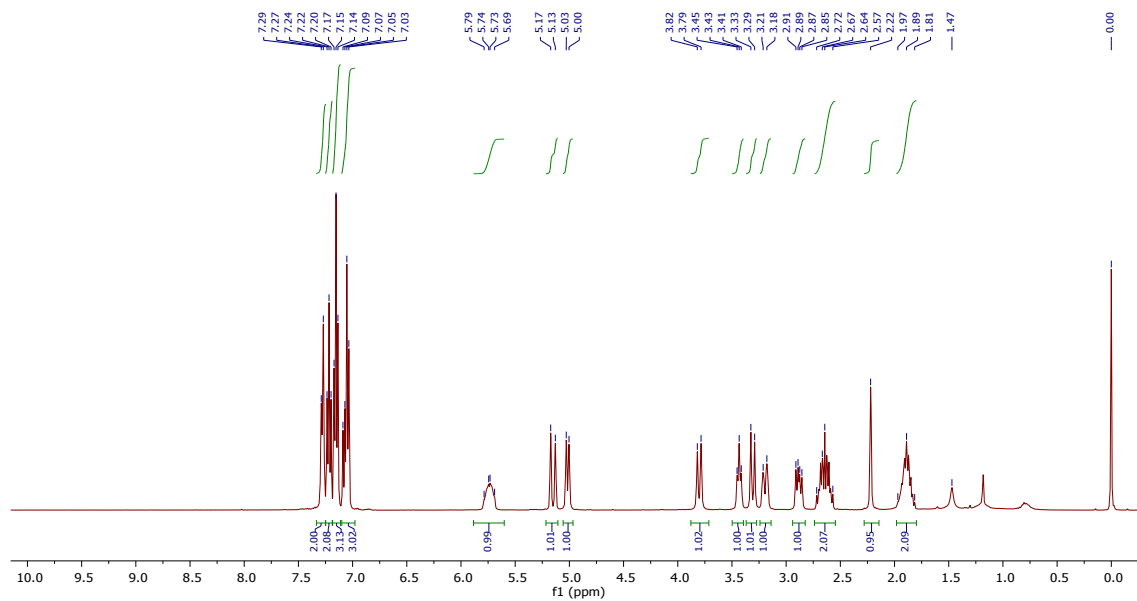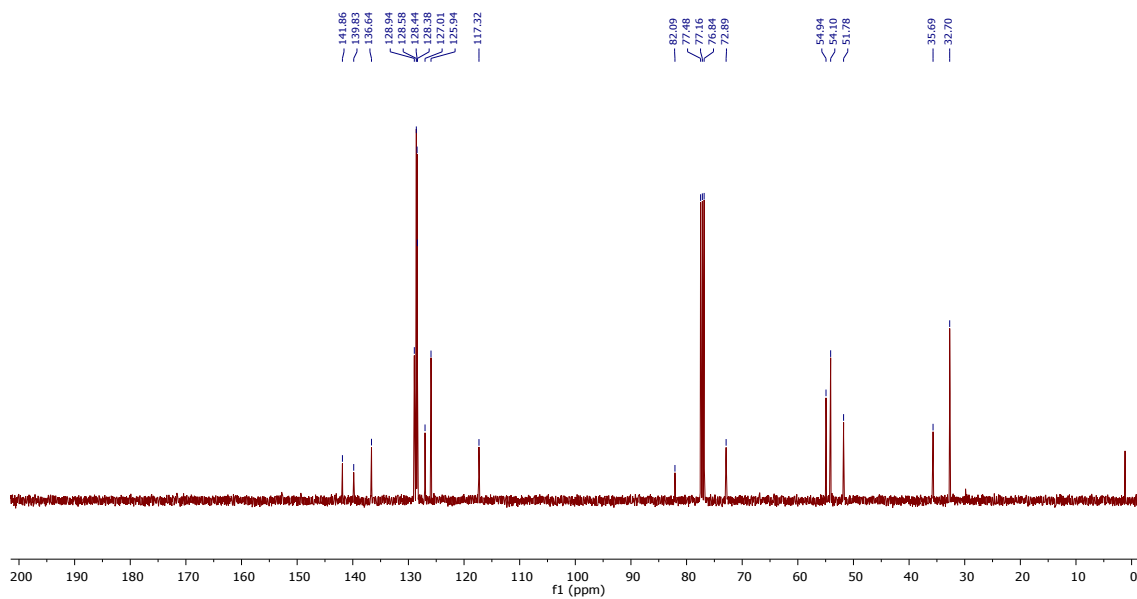

### HPLC trace of *rac-3r*

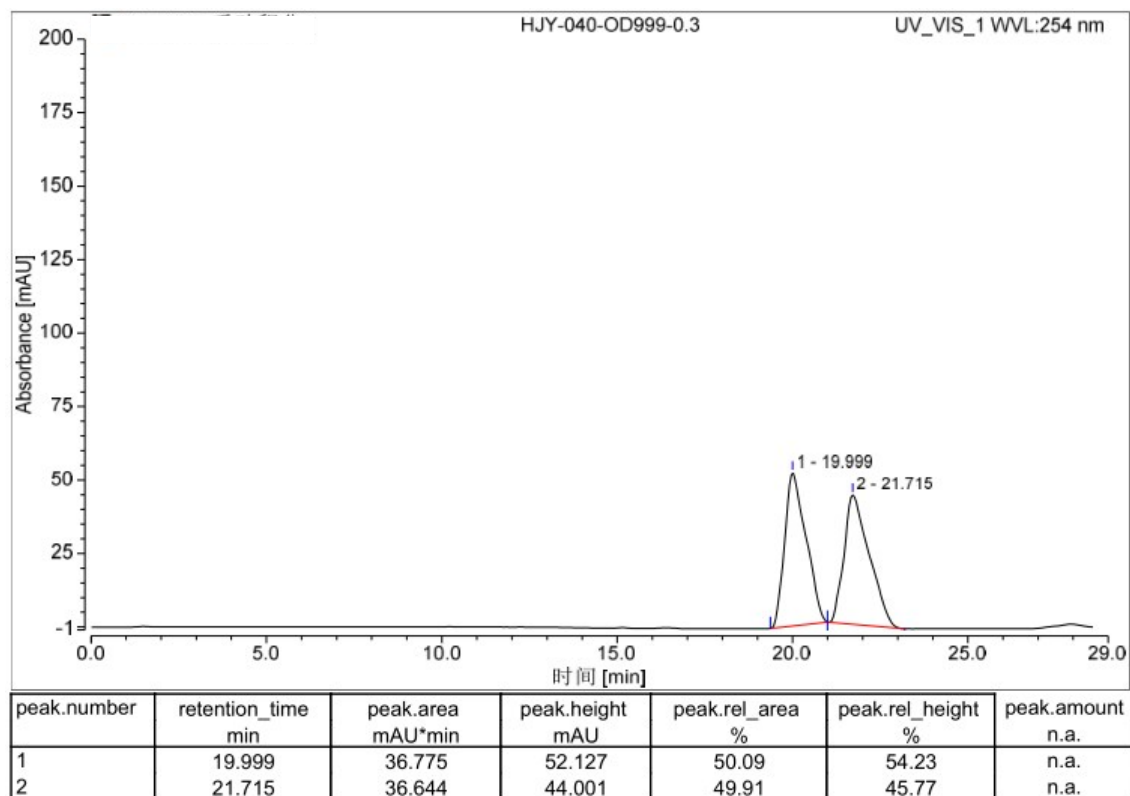

### HPLC trace of *3r*

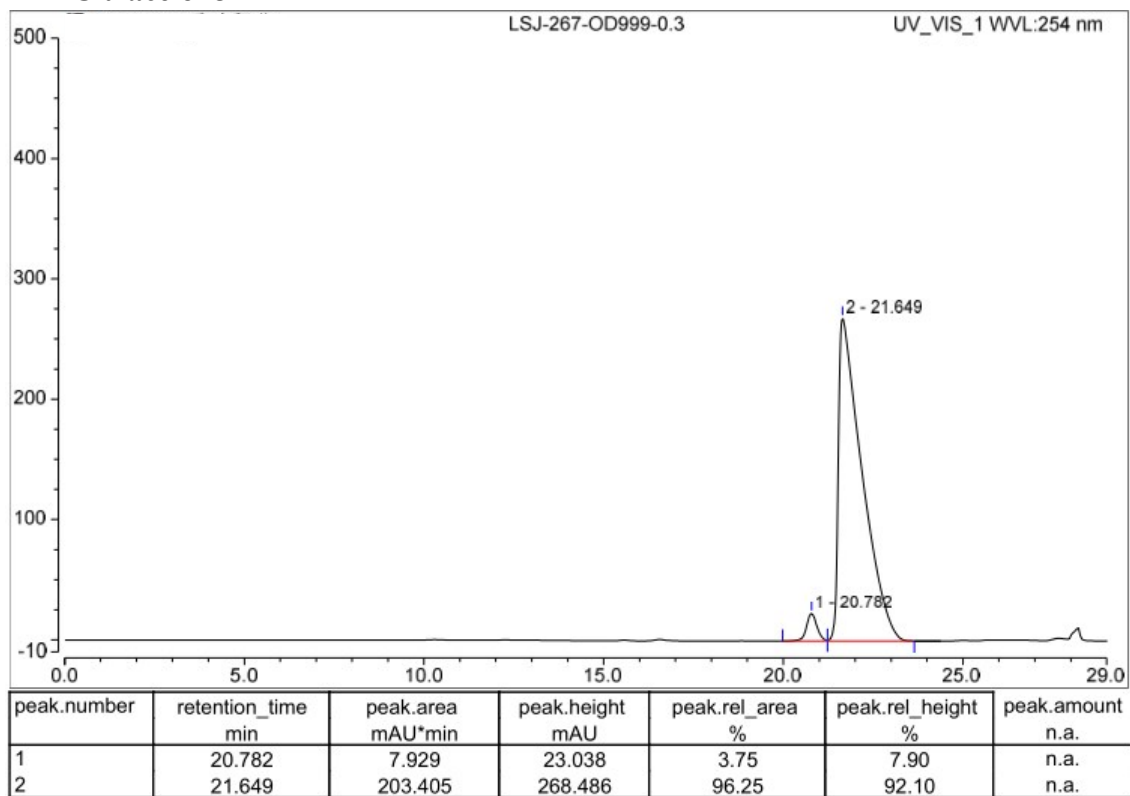

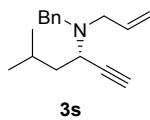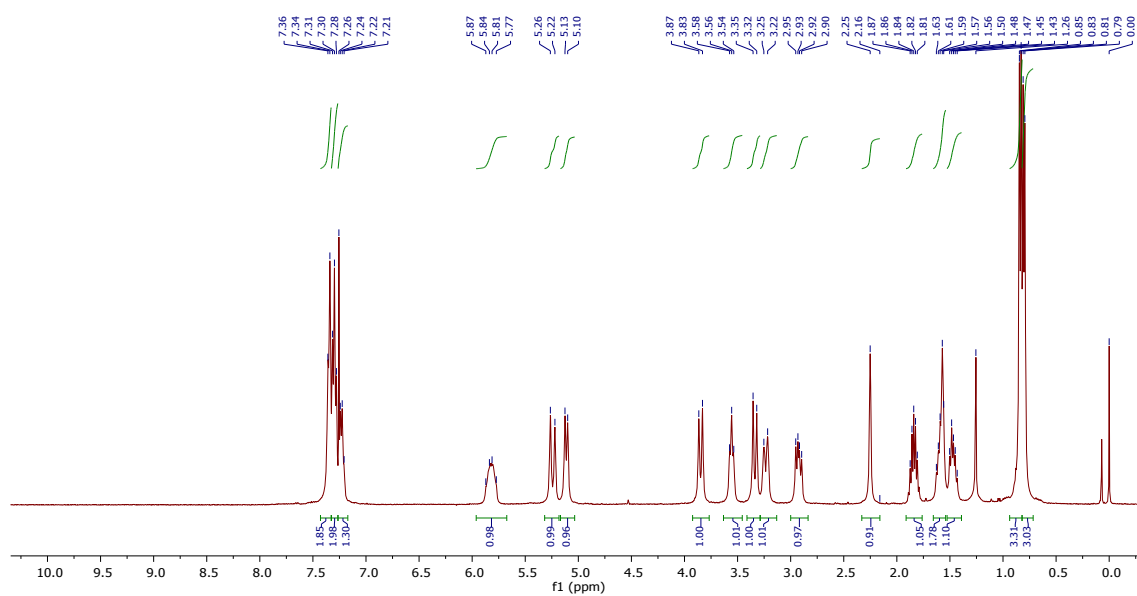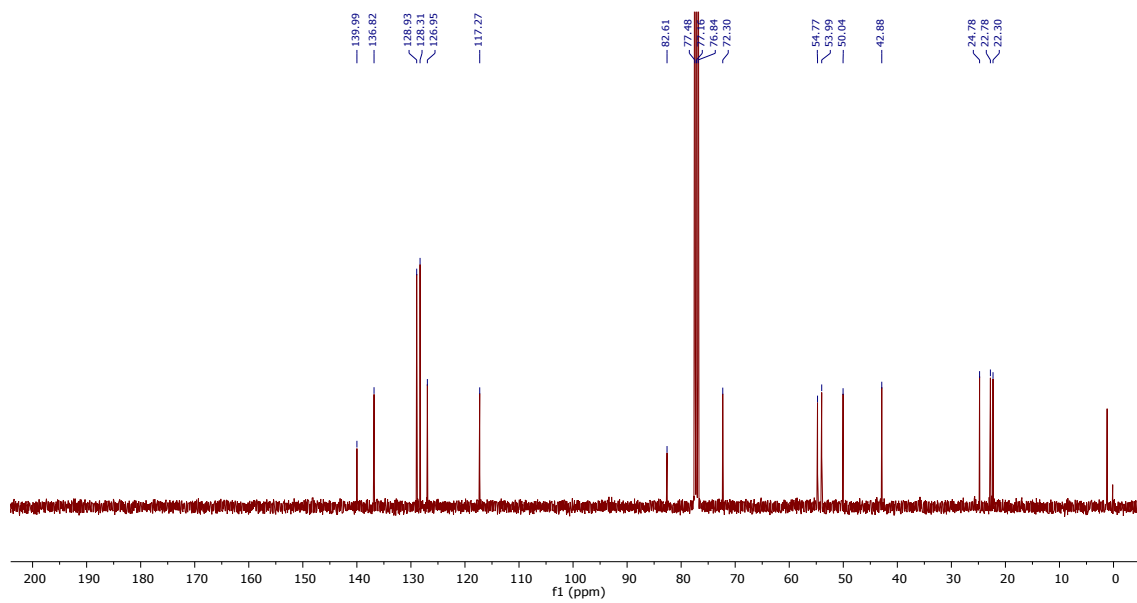

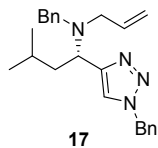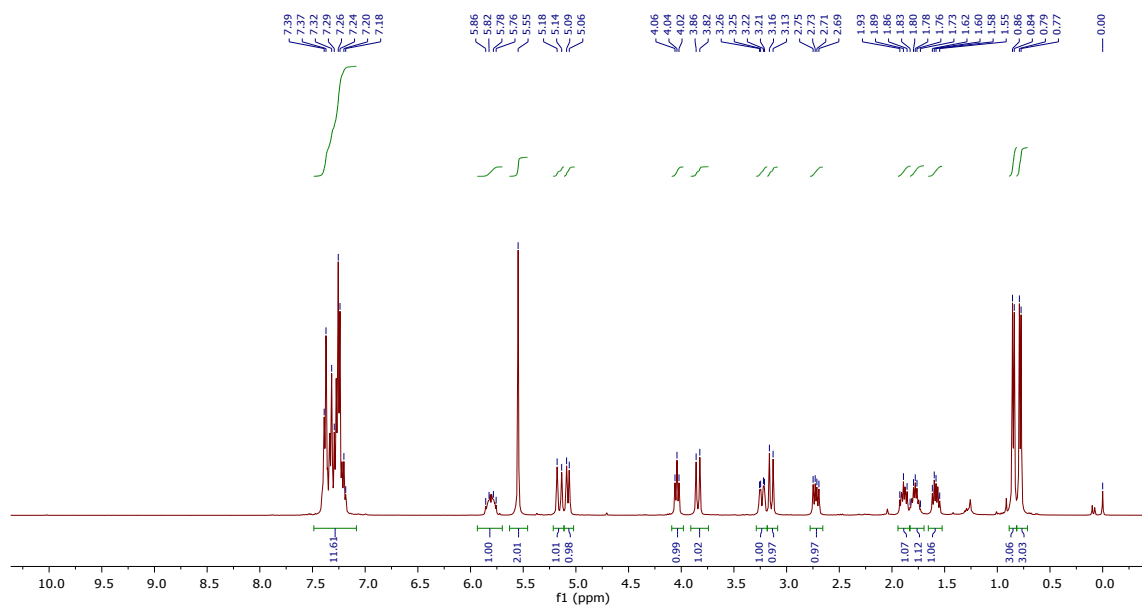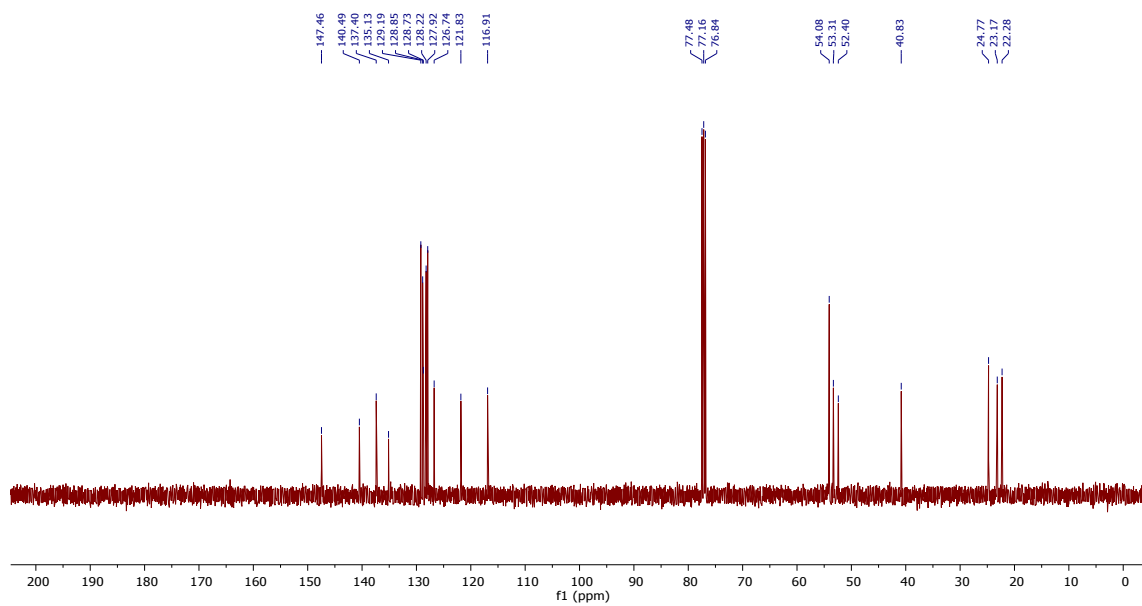

### HPLC trace of rac-17

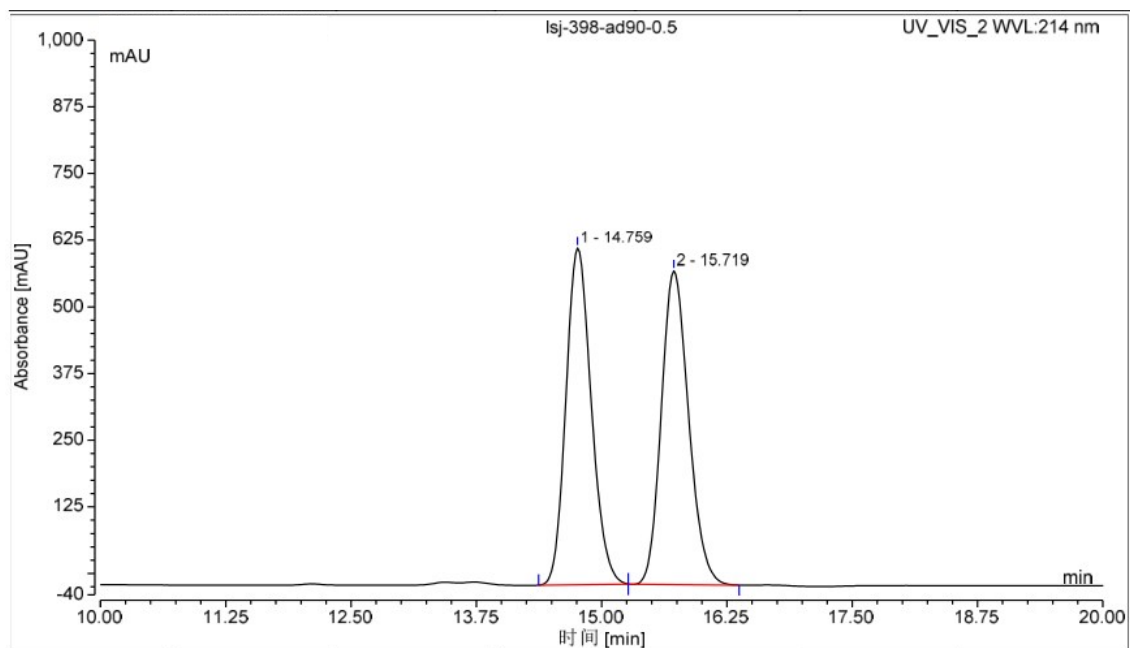

| peak.number | retention_time<br>min | peak.area<br>mAU*min | peak.height<br>mAU | peak.rel_area<br>% | peak.rel_height<br>% | peak.amount<br>n.a. |
|-------------|-----------------------|----------------------|--------------------|--------------------|----------------------|---------------------|
| 1           | 14.759                | 185.080              | 631.641            | 49.99              | 51.78                | n.a.                |
| 2           | 15.719                | 185.169              | 588.239            | 50.01              | 48.22                | n.a.                |

### HPLC trace of 17

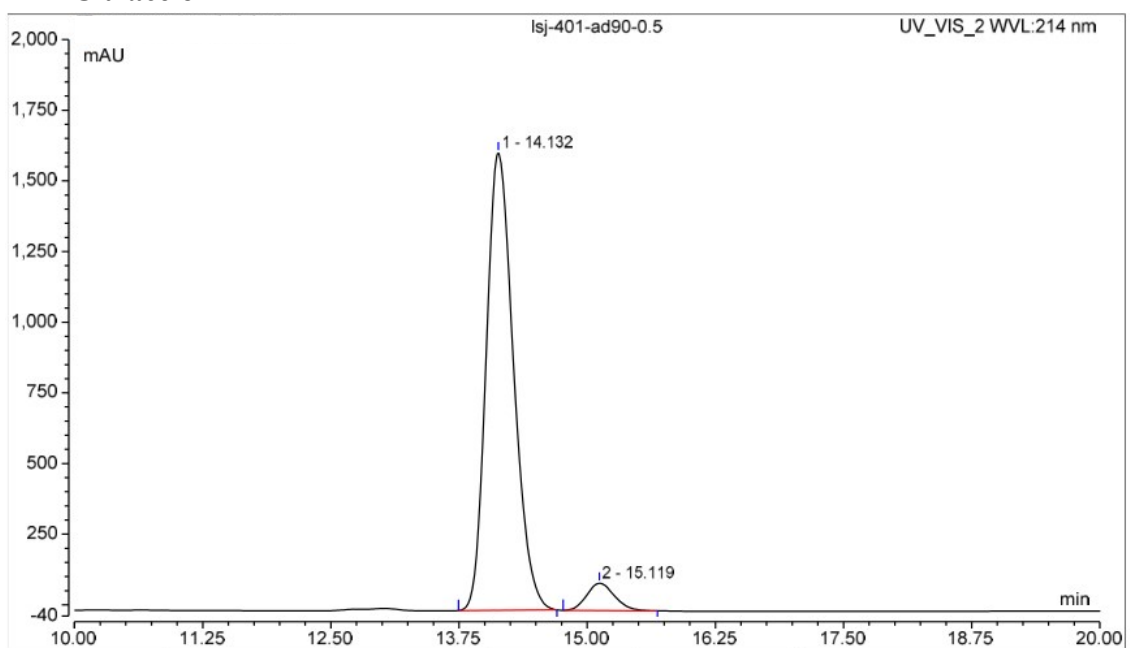

| peak.number | retention_time<br>min | peak.area<br>mAU*min | peak.height<br>mAU | peak.rel_area<br>% | peak.rel_height<br>% | peak.amount<br>n.a. |
|-------------|-----------------------|----------------------|--------------------|--------------------|----------------------|---------------------|
| 1           | 14.132                | 499.203              | 1618.258           | 94.28              | 94.37                | n.a.                |
| 2           | 15.119                | 30.290               | 96.536             | 5.72               | 5.63                 | n.a.                |

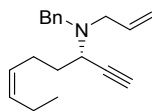

**3t**

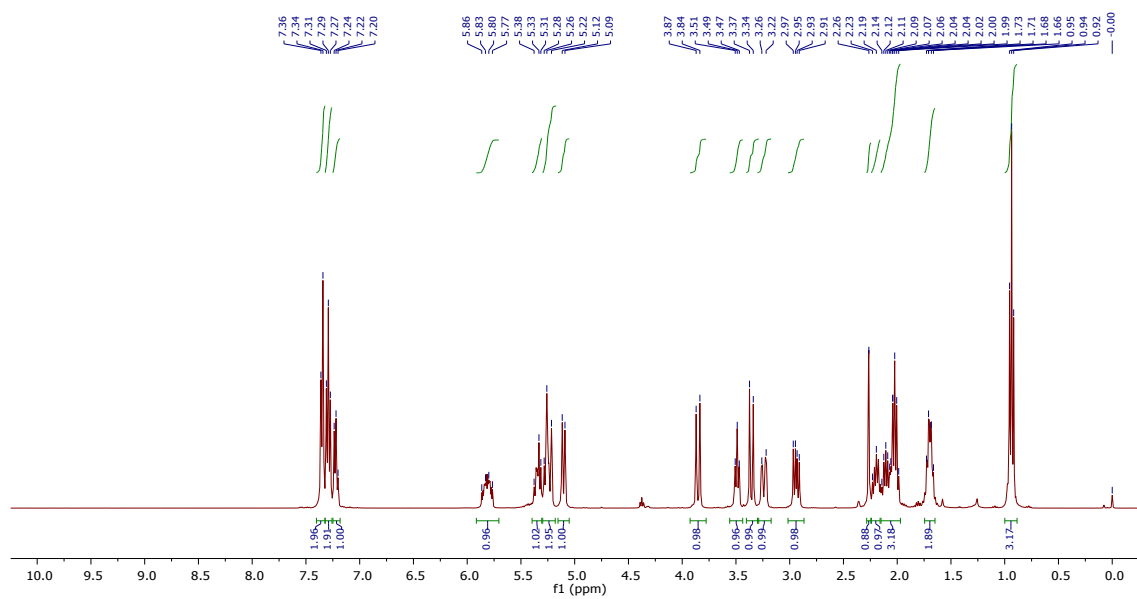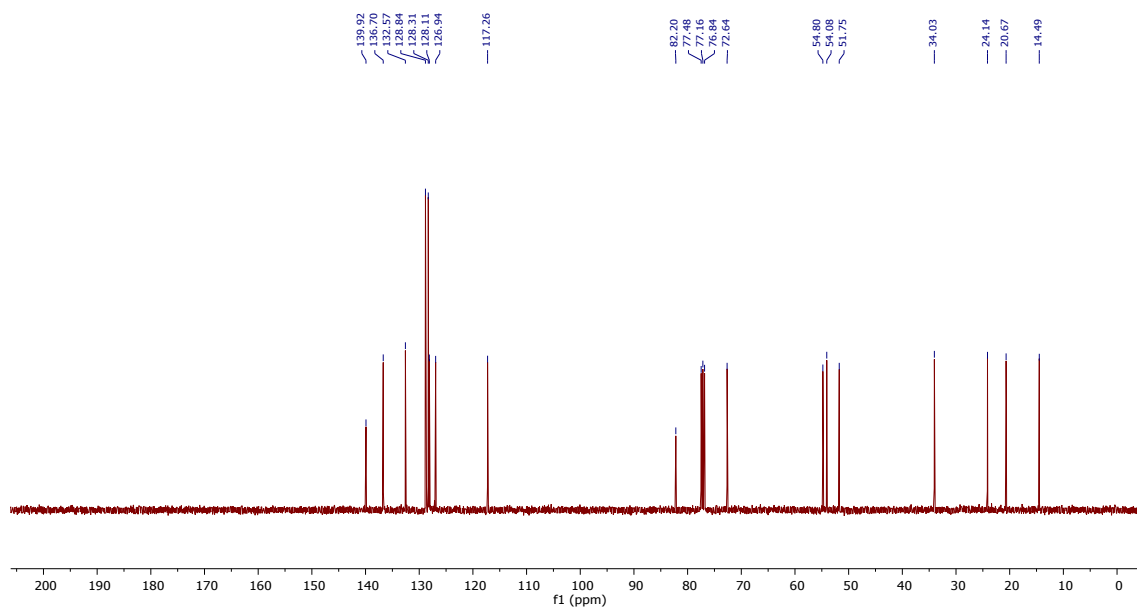

### HPLC trace of rac-3t

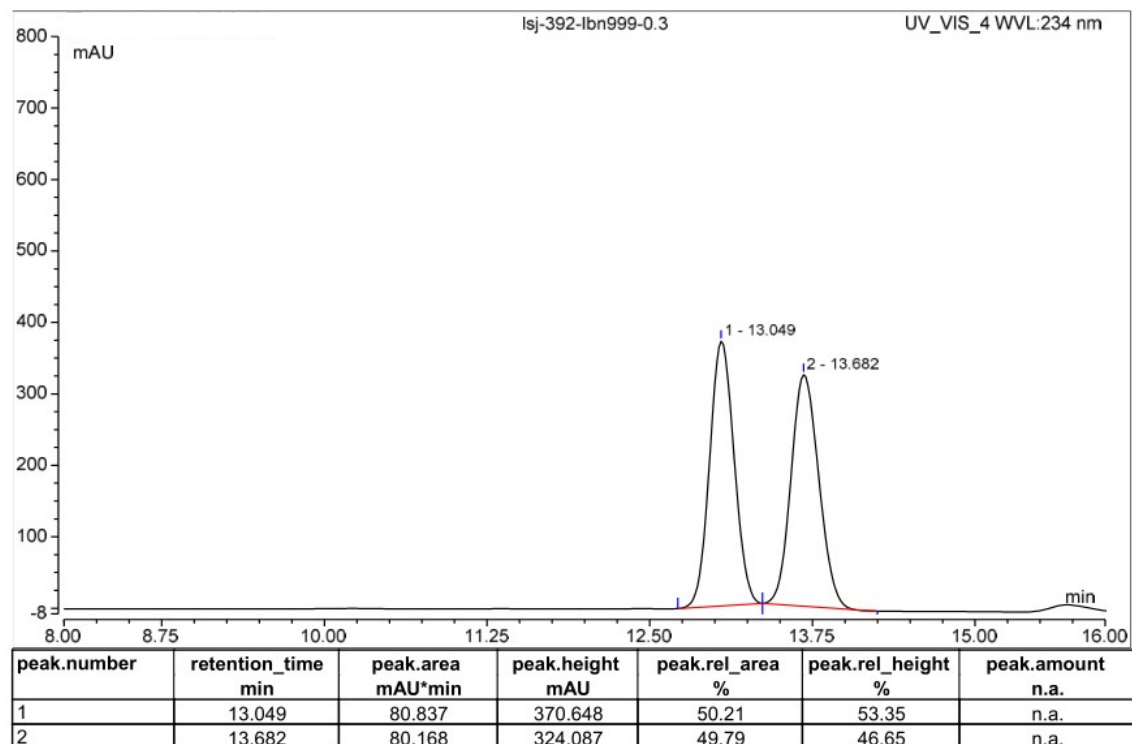

### HPLC trace of 3t

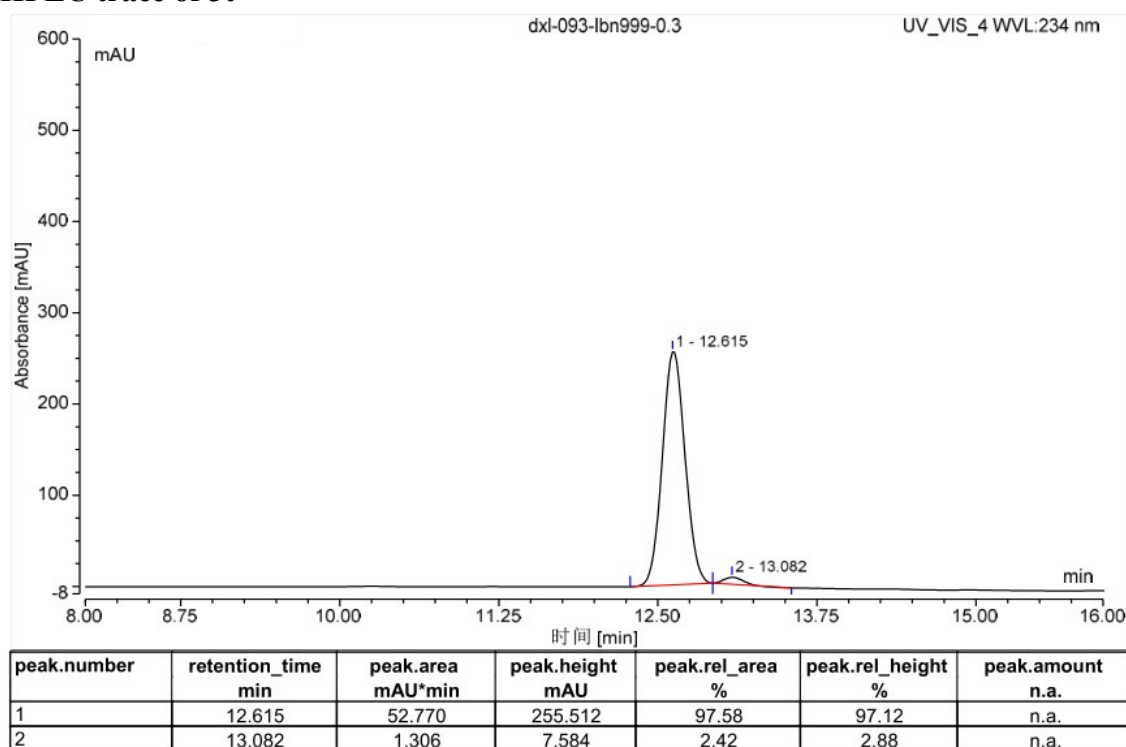



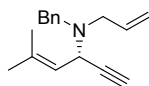

**3u**

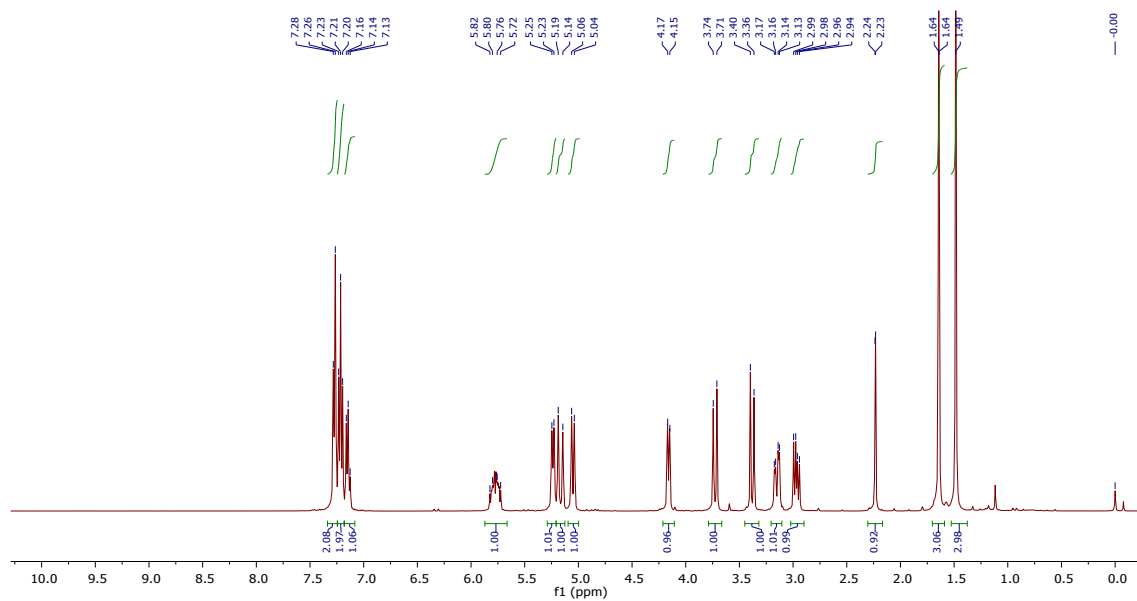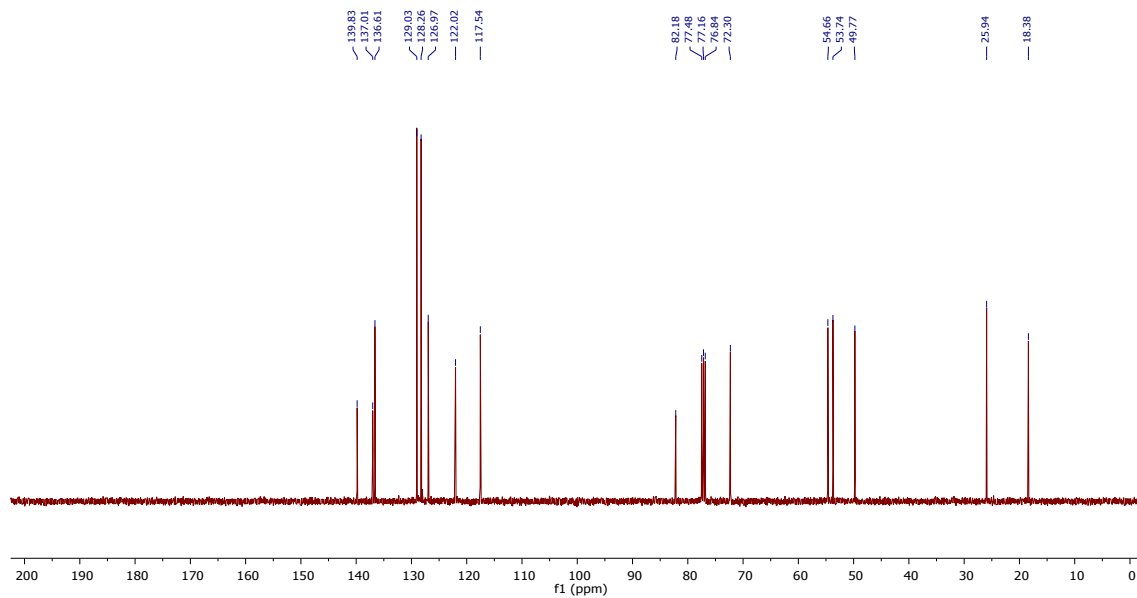

### HPLC trace of *rac-3u*

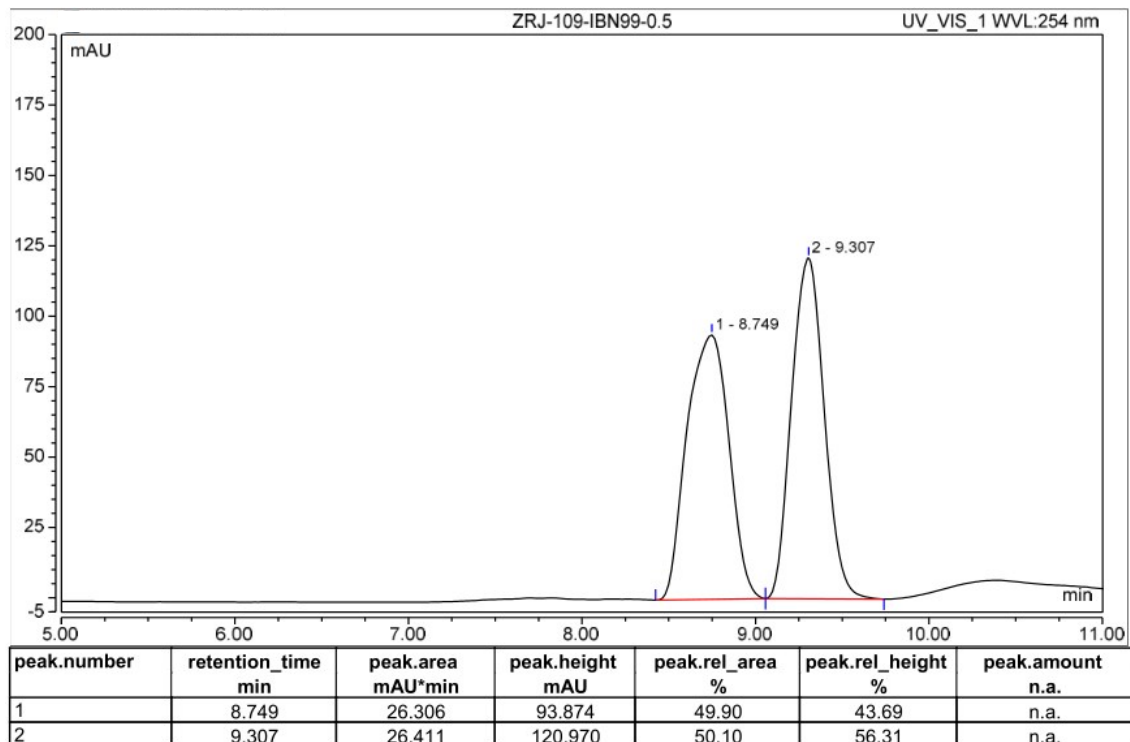

### HPLC trace of *3u*

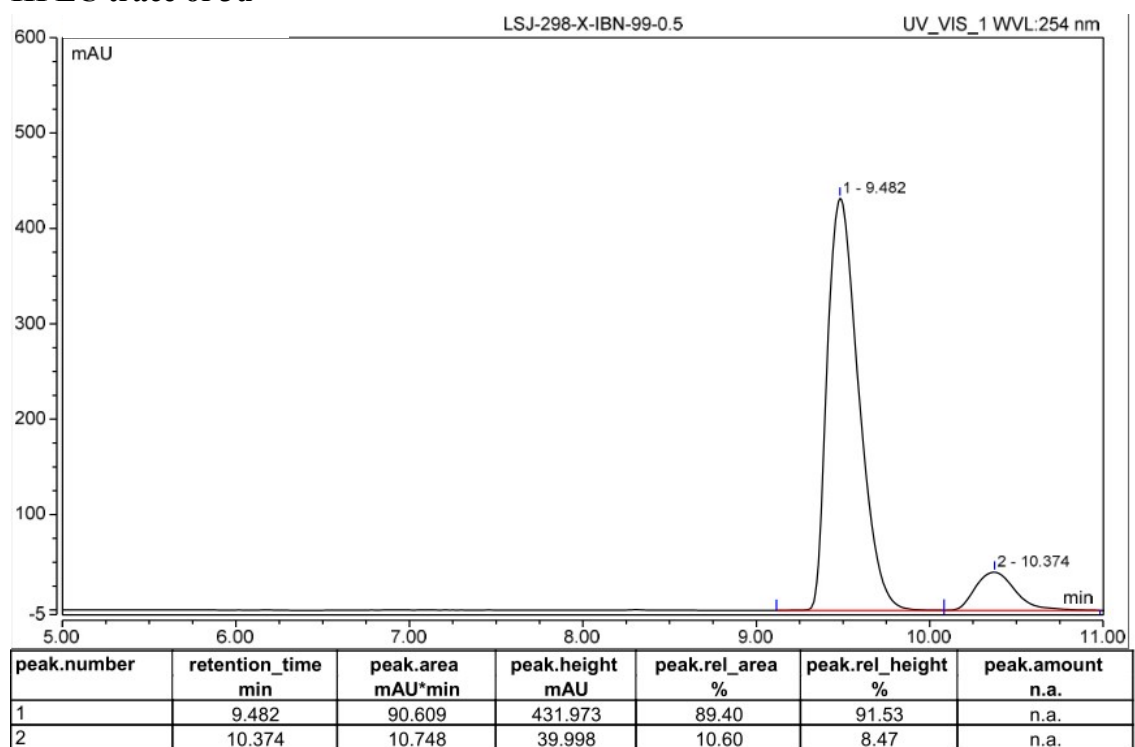

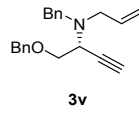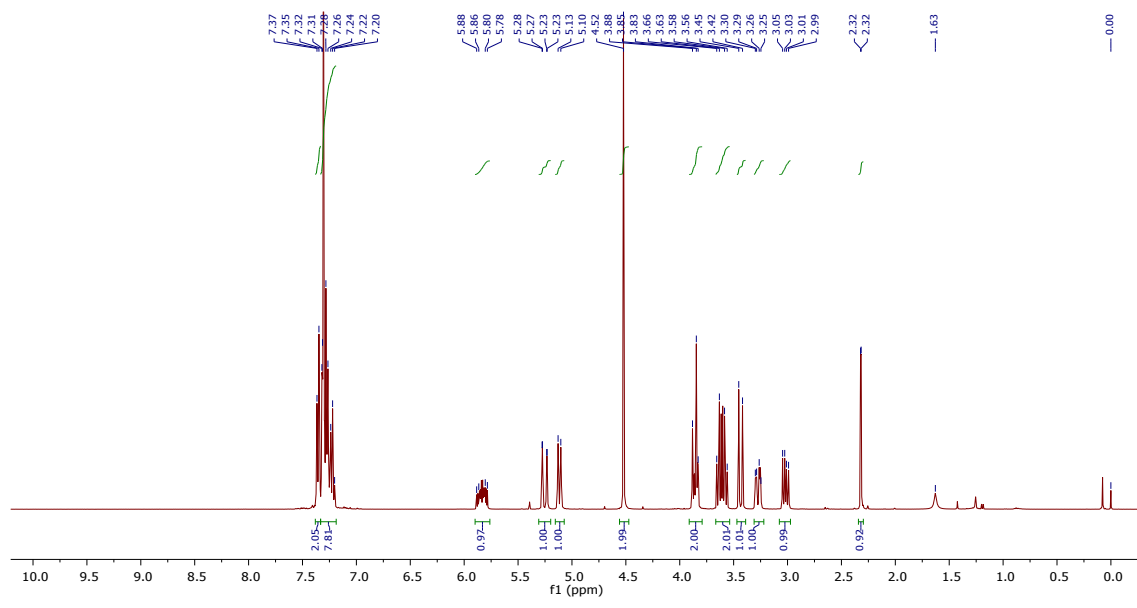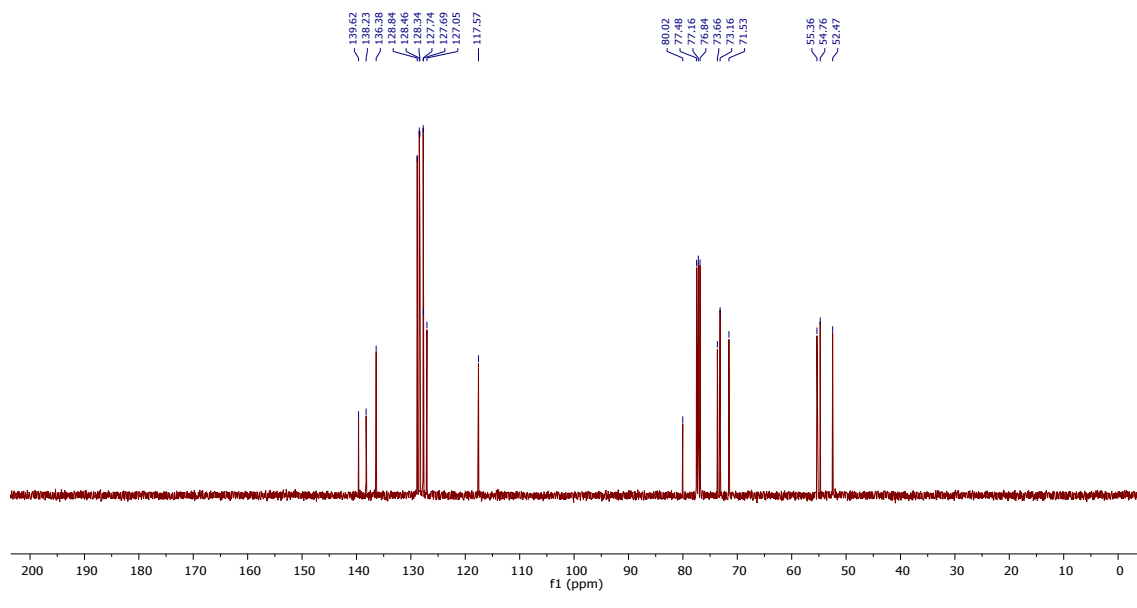

### HPLC trace of *rac-3v*

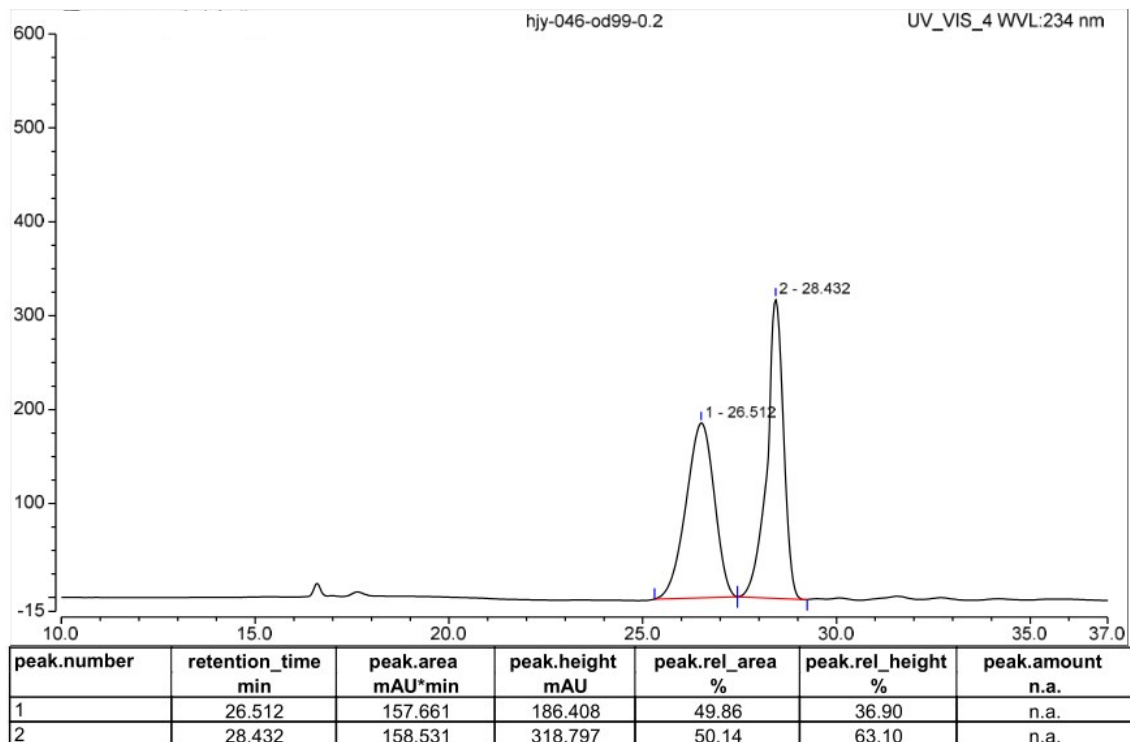

### HPLC trace of 3v

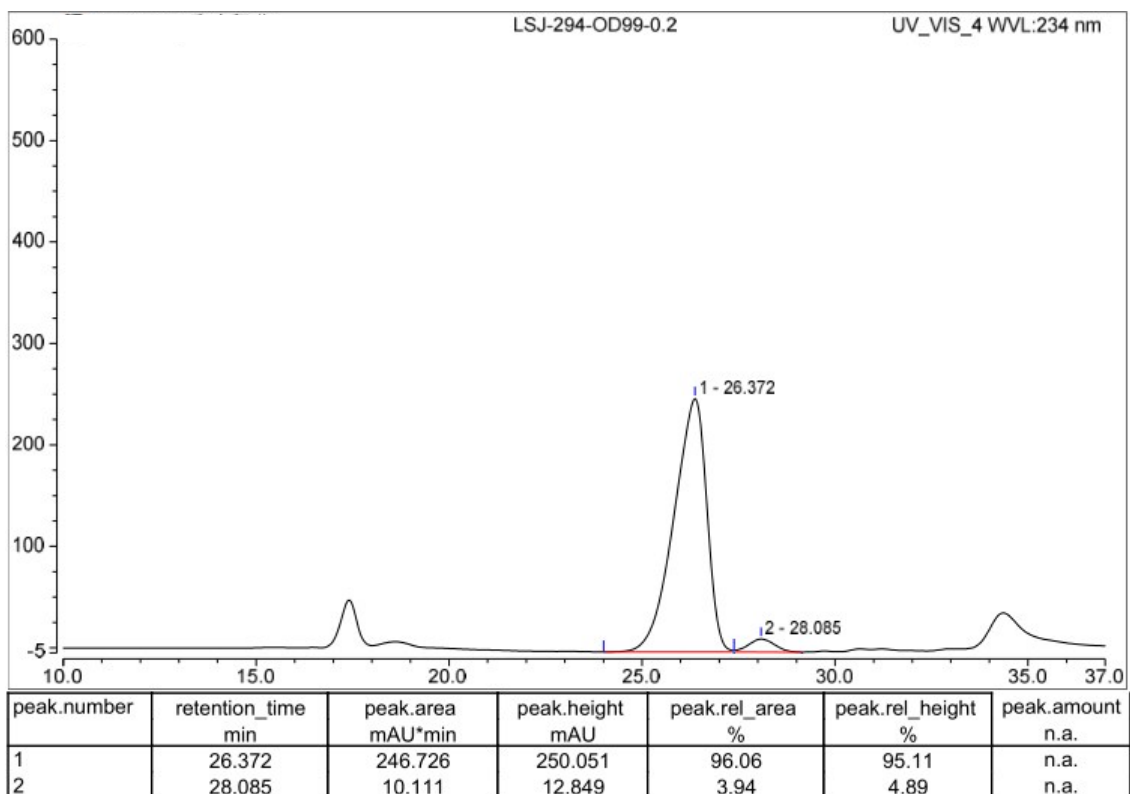

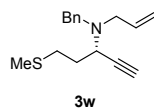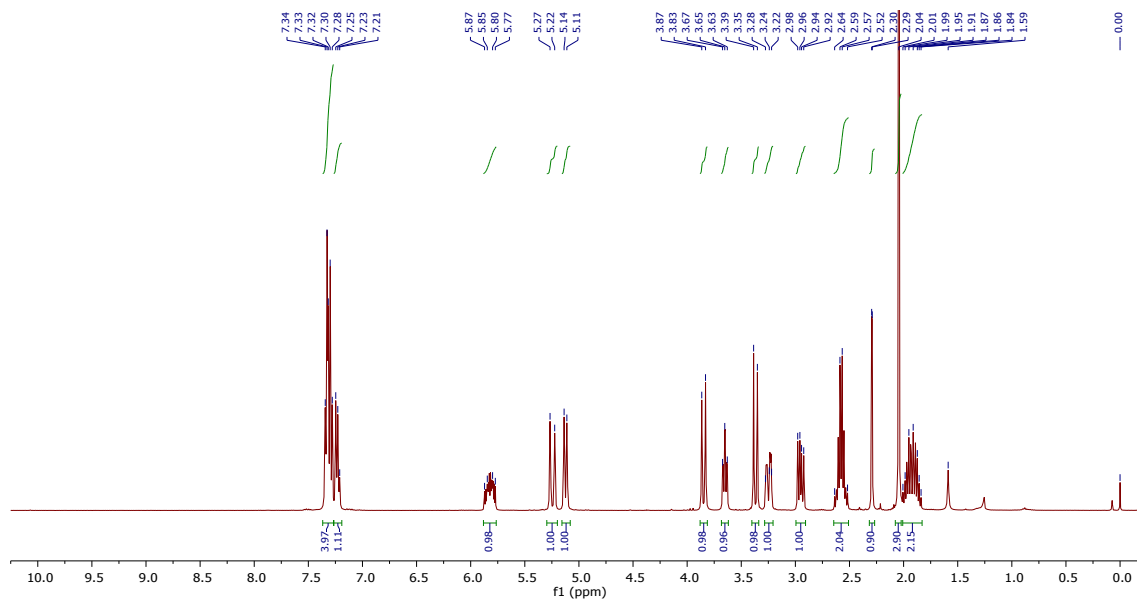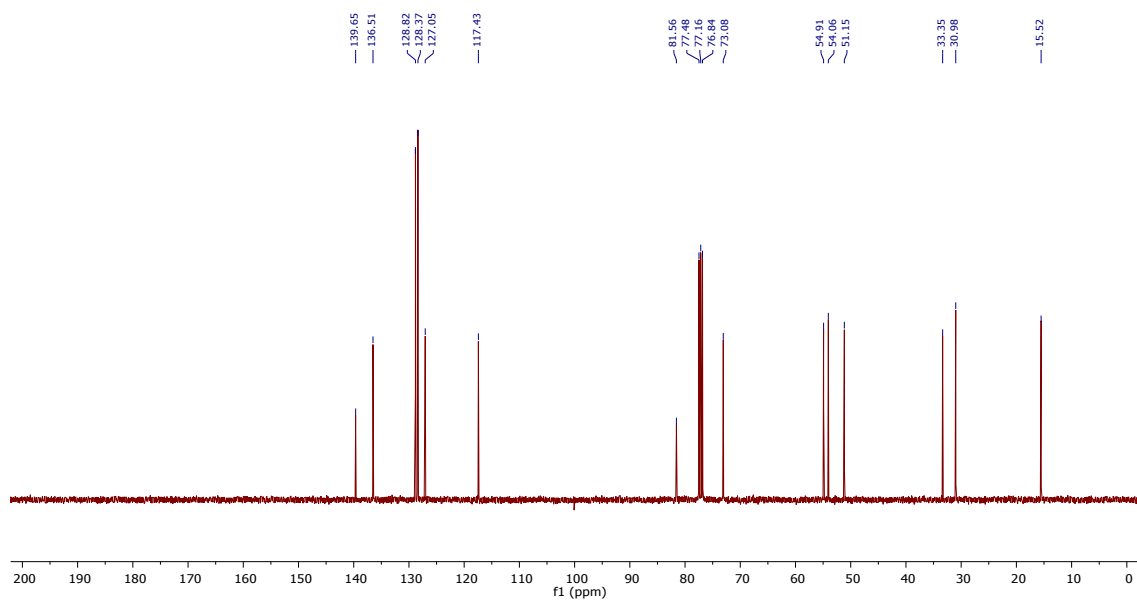

### HPLC trace of *rac-3w*

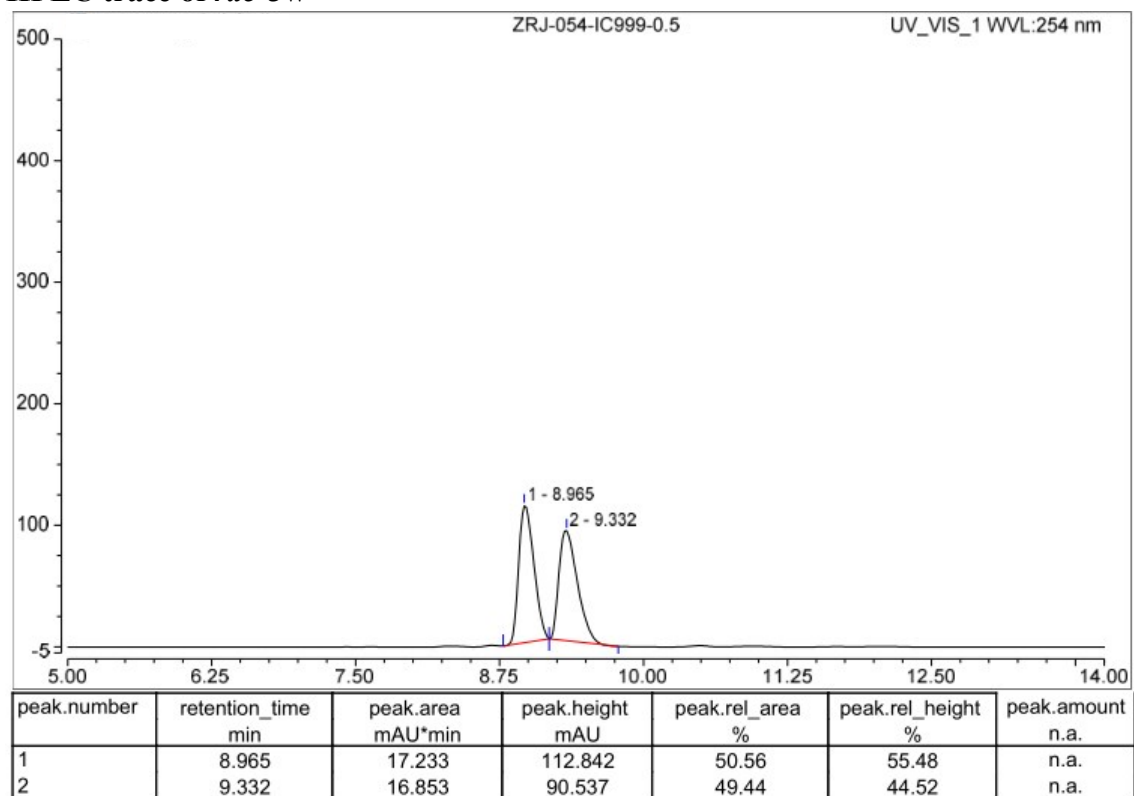

### HPLC trace of 3w

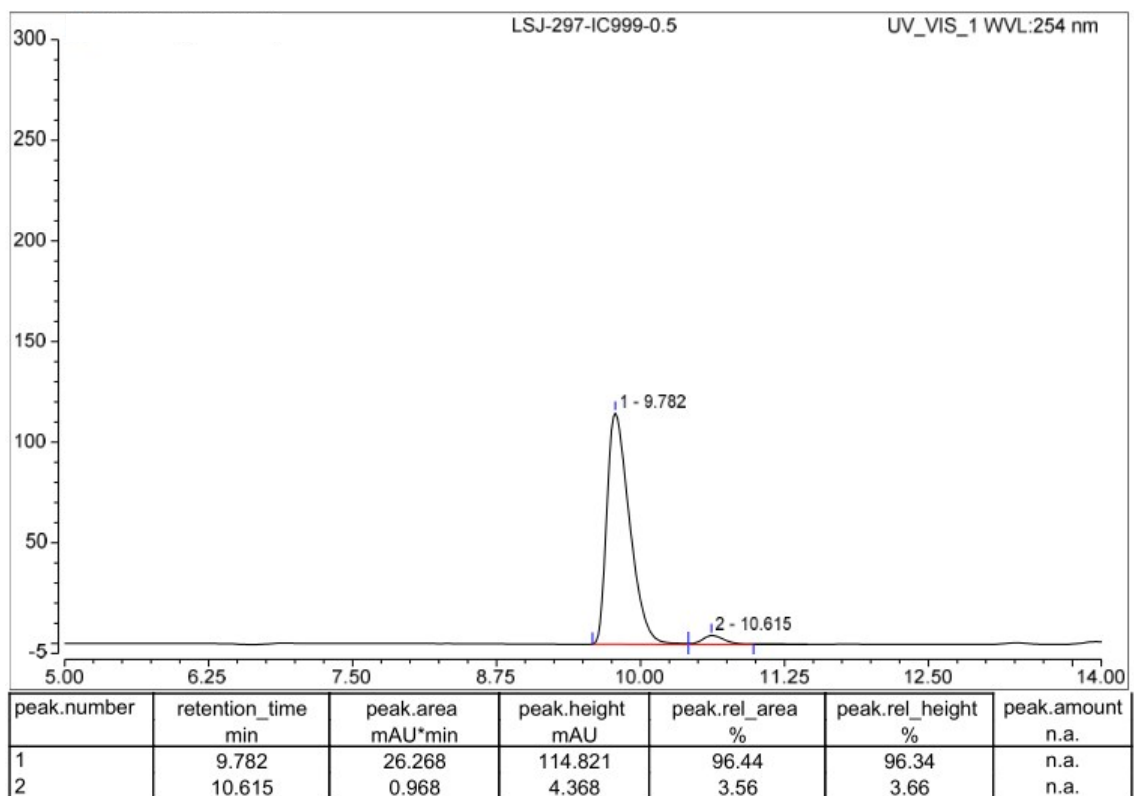

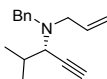

**3x**

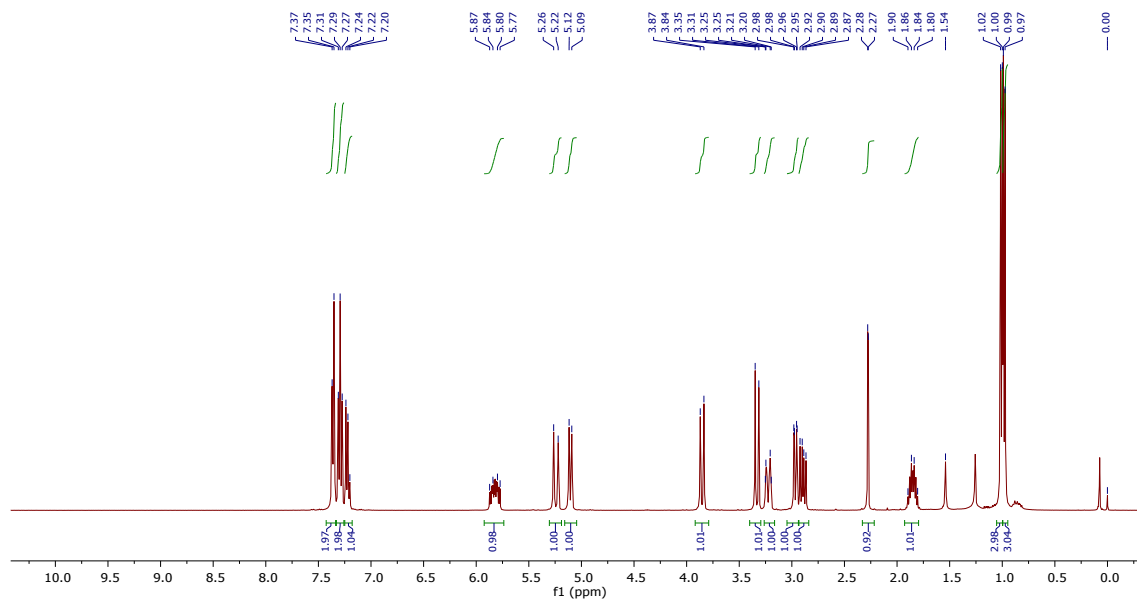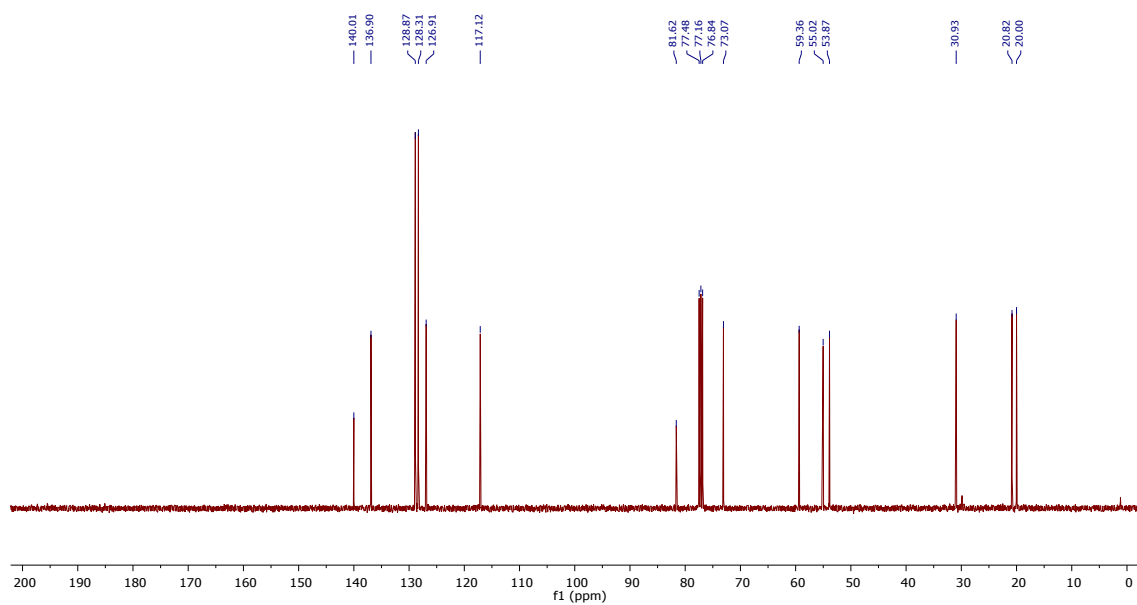

### HPLC trace of *rac-3x*

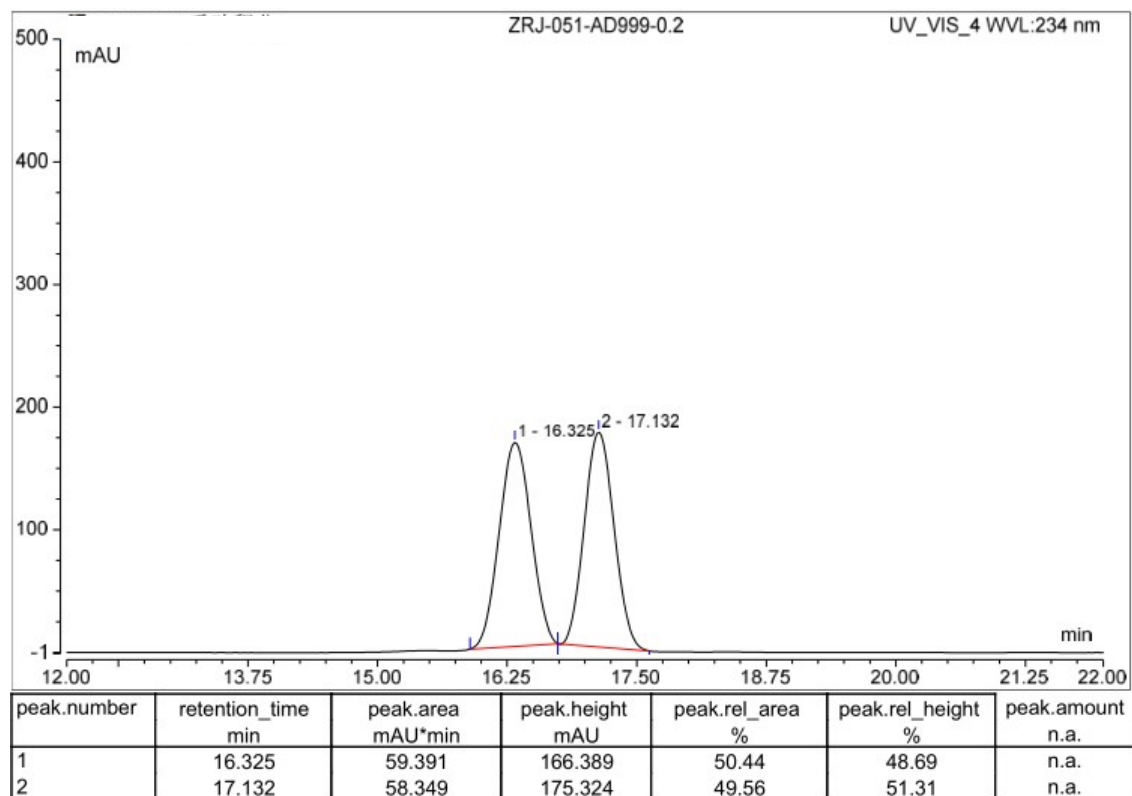

### HPLC trace of 3x

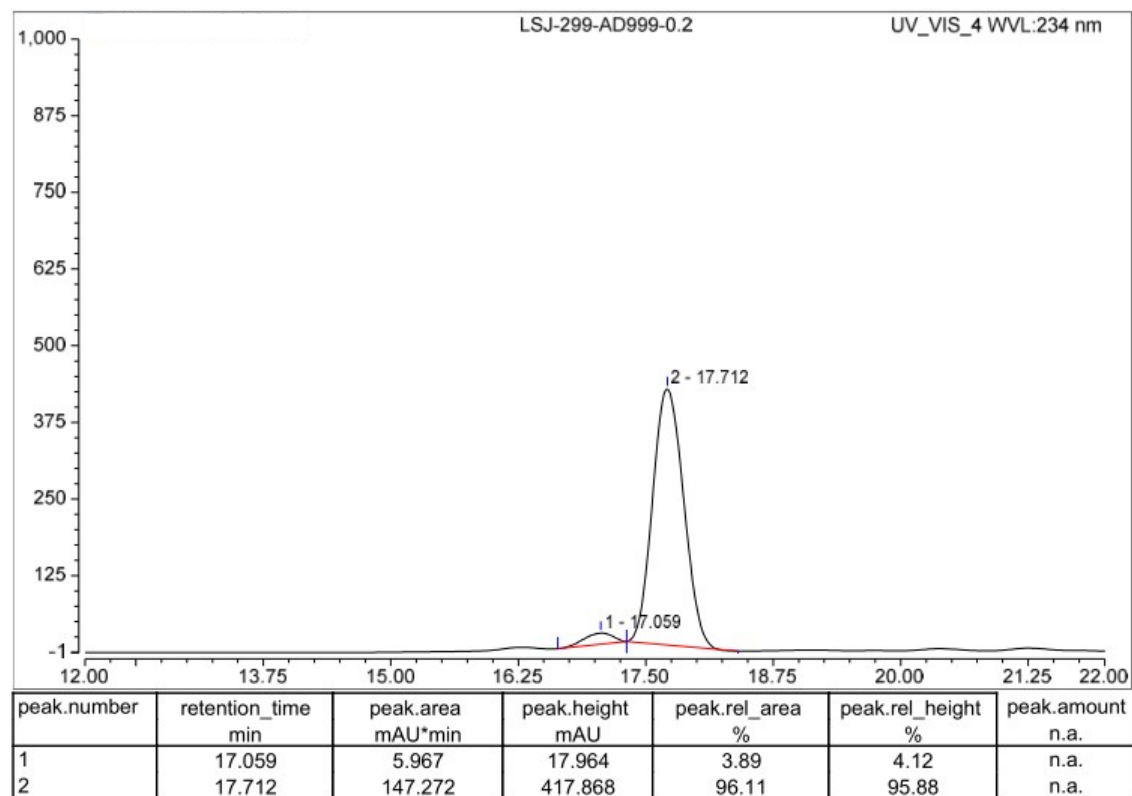



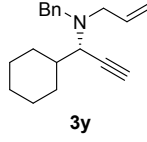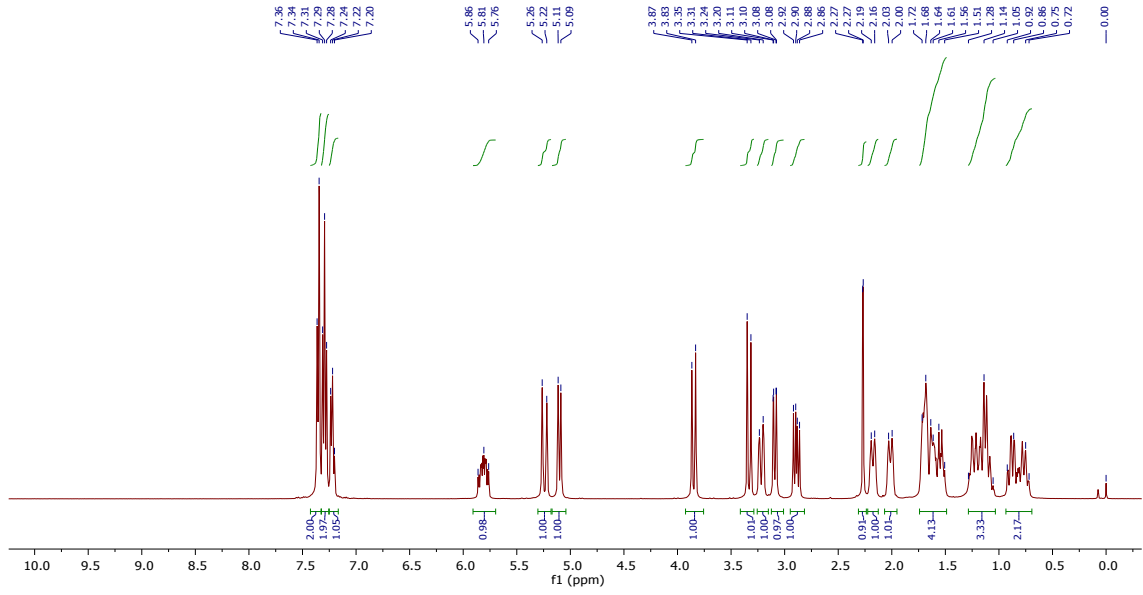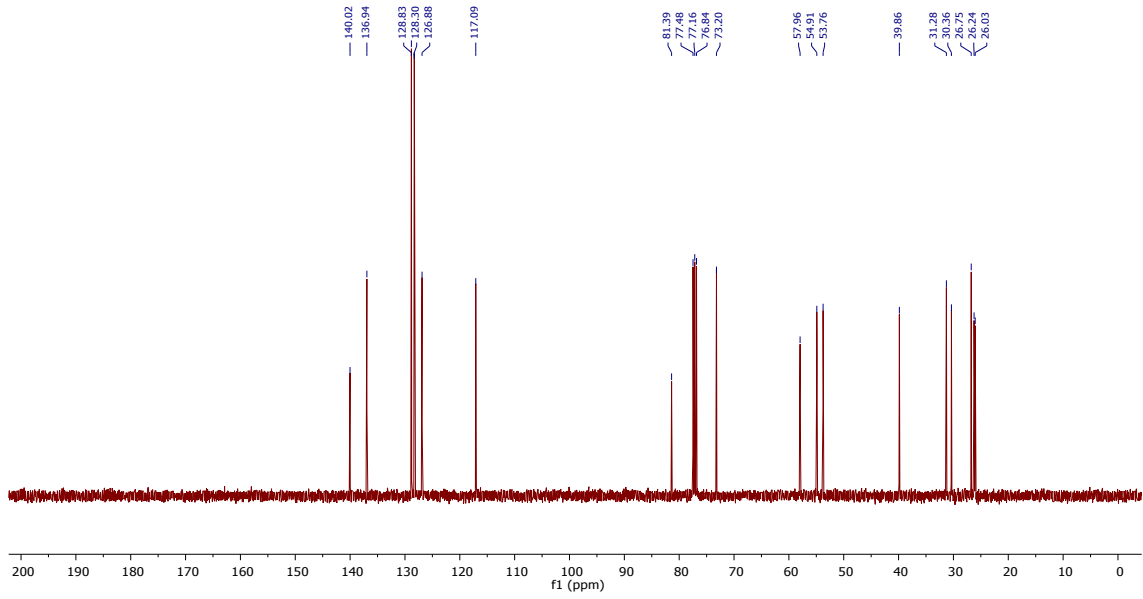

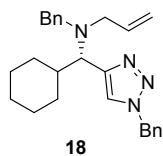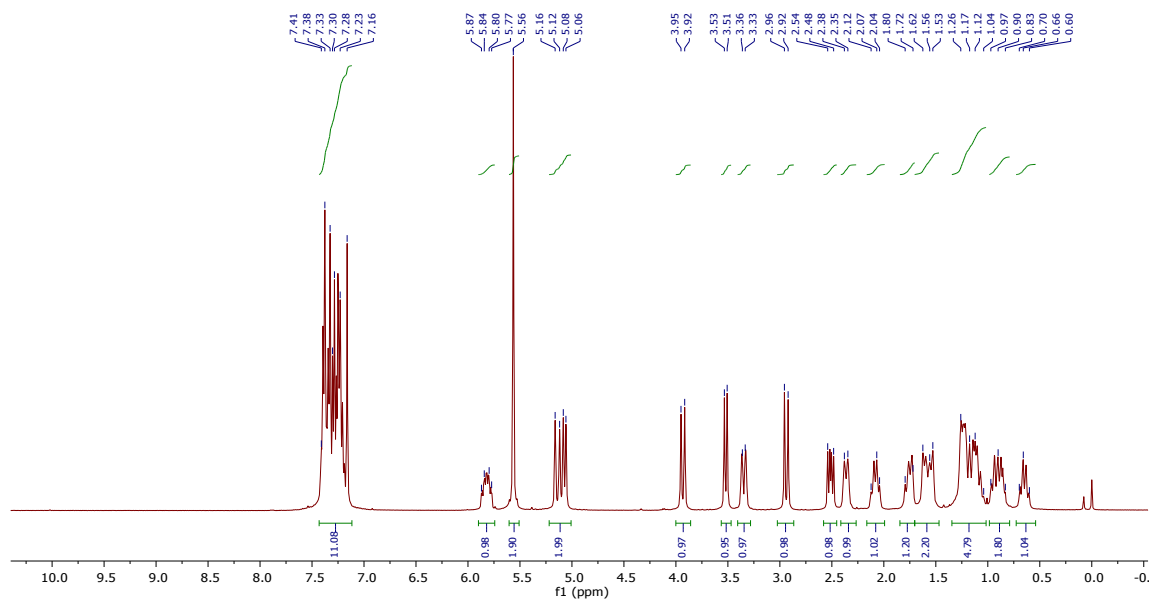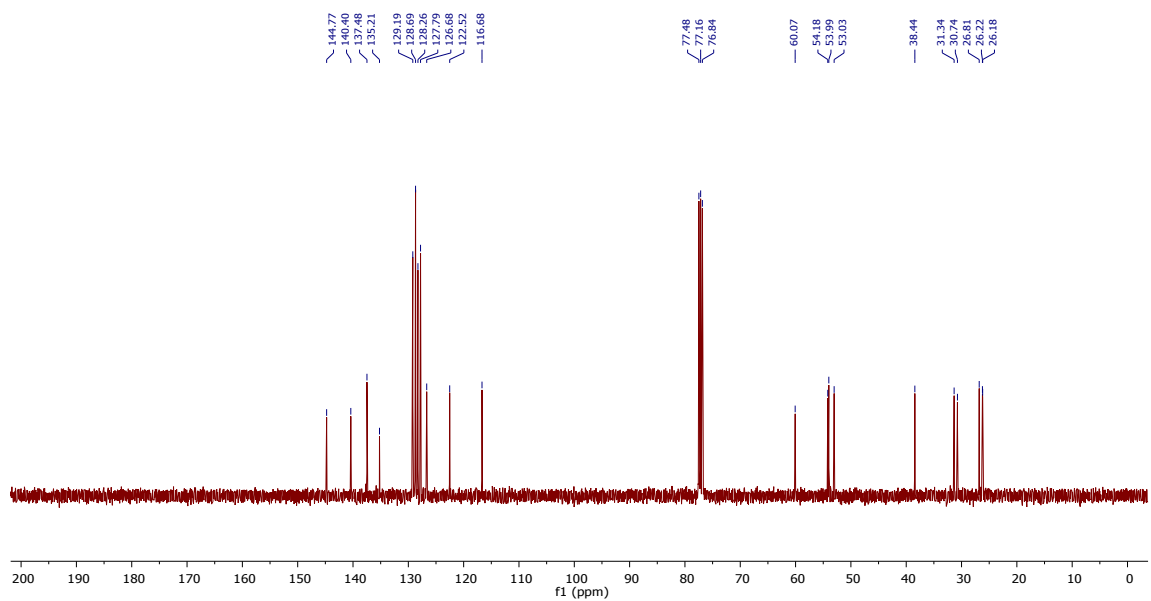

## HPLC trace of *rac*-18

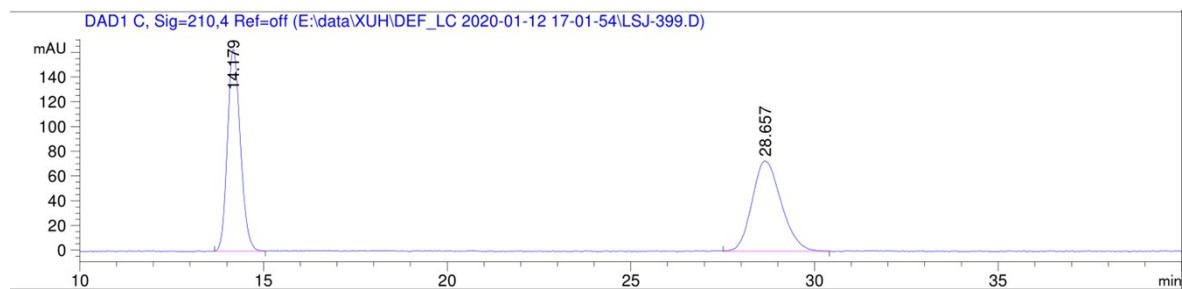

| Retention time<br>[min] | Width<br>[min] | Area<br>[mAU*s] | Hight<br>[mAU] | Hight<br>% |
|-------------------------|----------------|-----------------|----------------|------------|
| 14.179 BB               | 0.3804         | 4006.81714      | 163.21062      | 49.8895    |
| 28.657 VV R             | 0.6754         | 4024.56909      | 72.97977       | 50.1105    |

## HPLC trace of 18

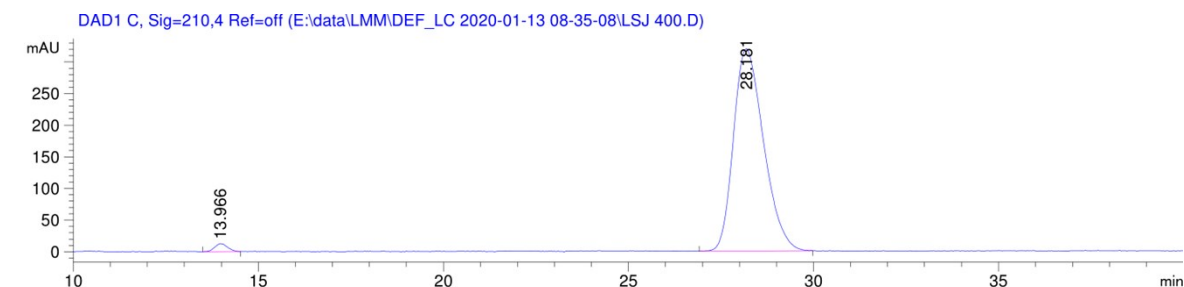

| Retention time<br>[min] | Width<br>[min] | Area<br>[mAU*s] | Hight<br>[mAU] | Hight<br>% |
|-------------------------|----------------|-----------------|----------------|------------|
| 13.966 VB R             | 0.2967         | 304.91458       | 12.58221       | 1.6620     |
| 28.181 VV R             | 0.7769         | 1.80410e4       | 319.44904      | 98.3380    |

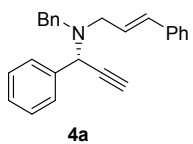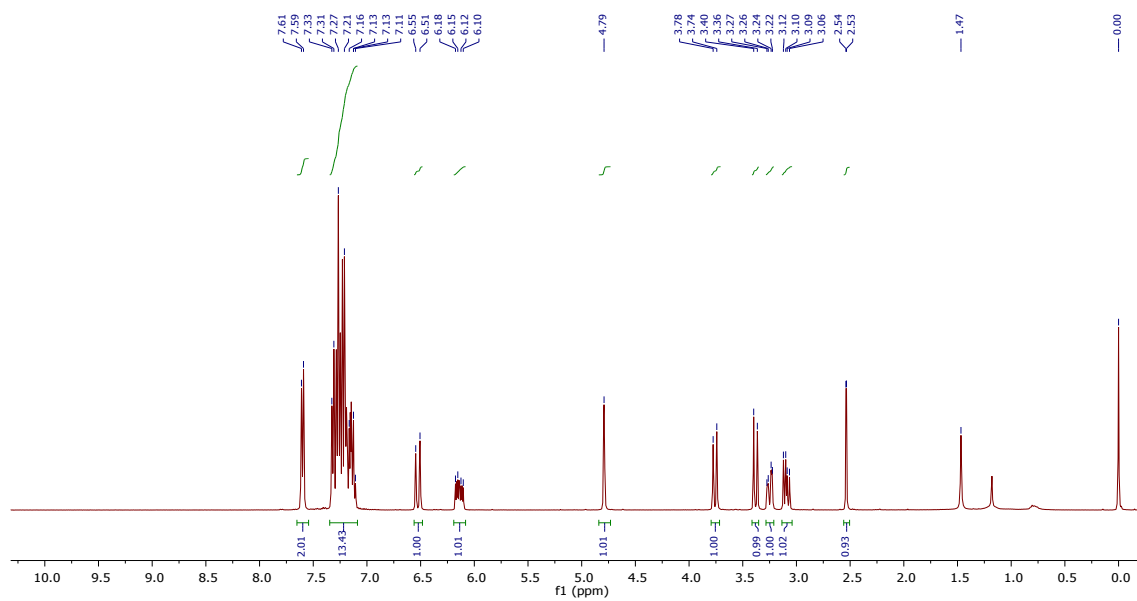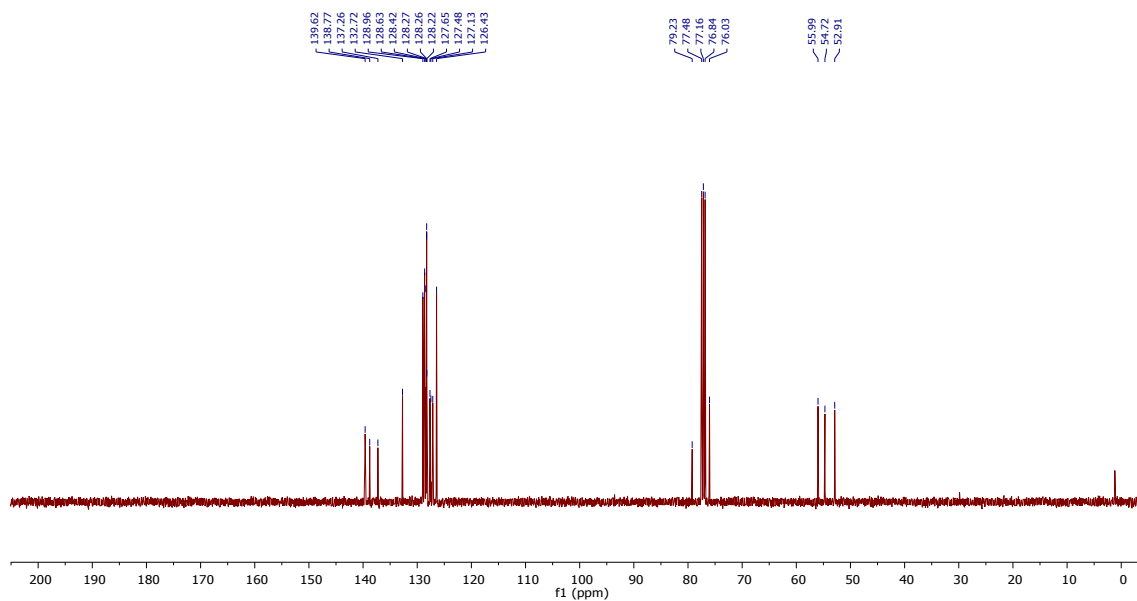

### HPLC trace of *rac-4a*

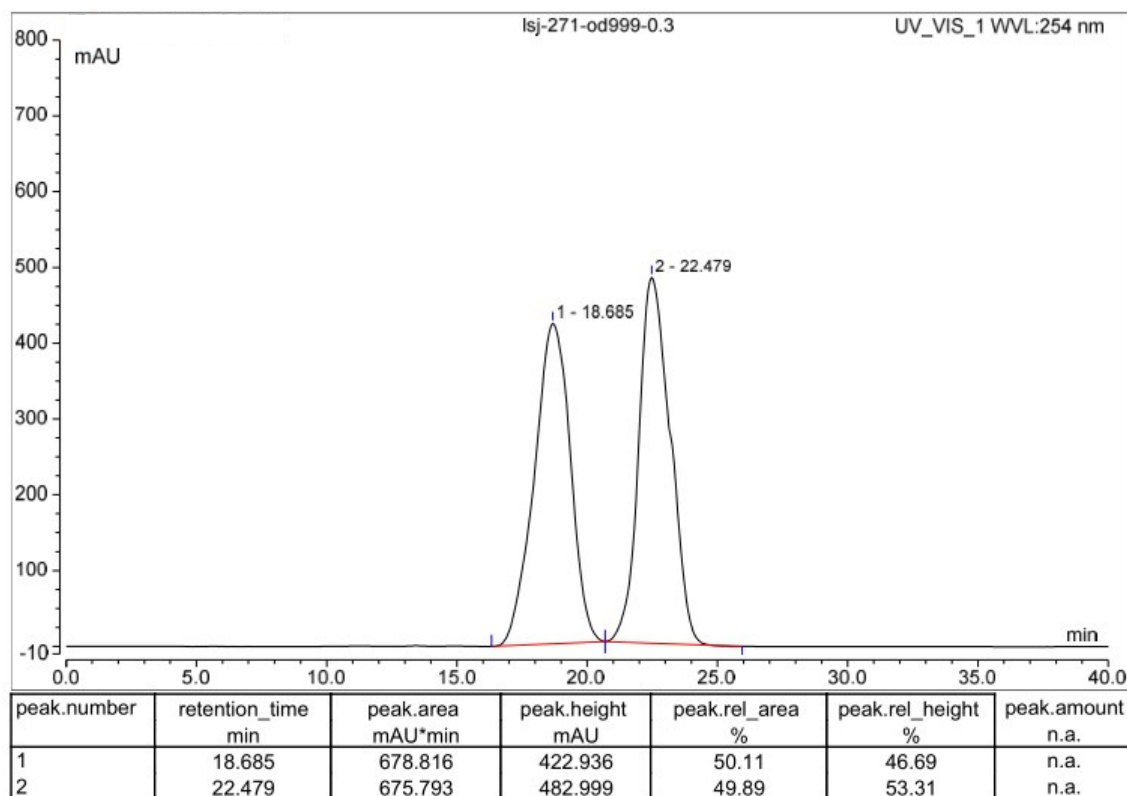

### HPLC trace of 4a

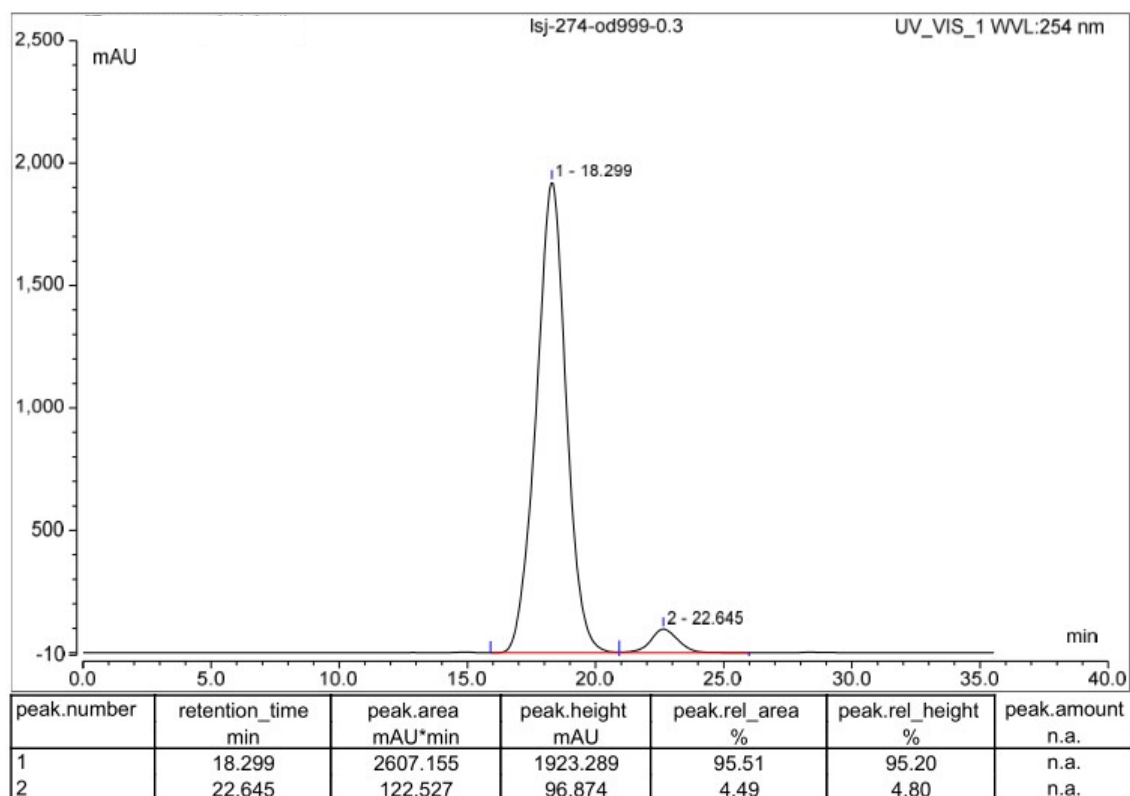

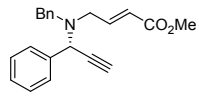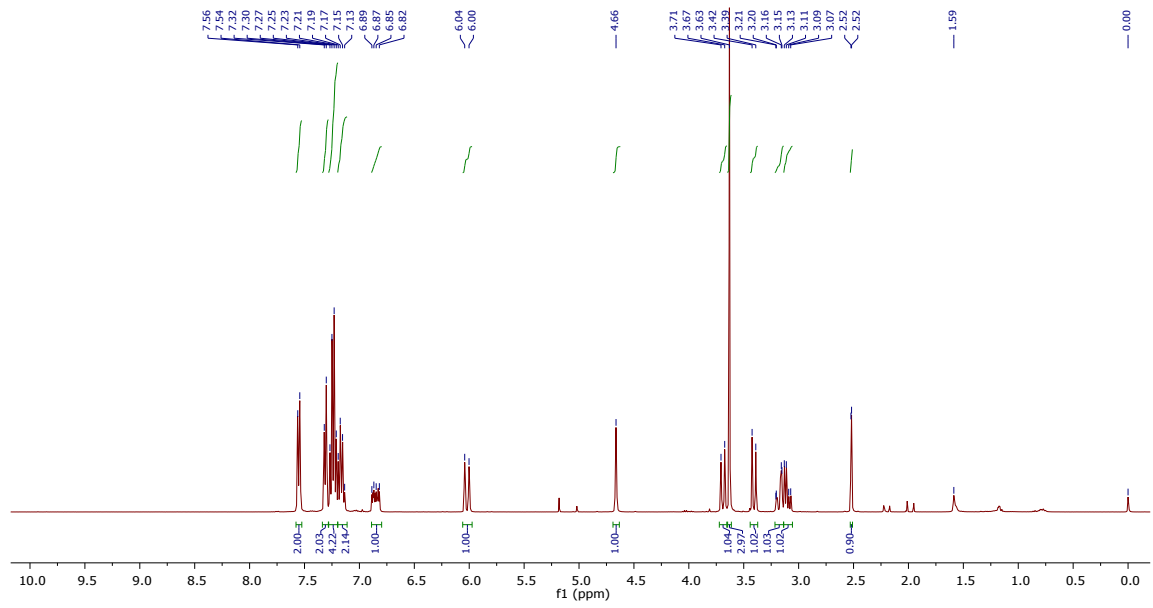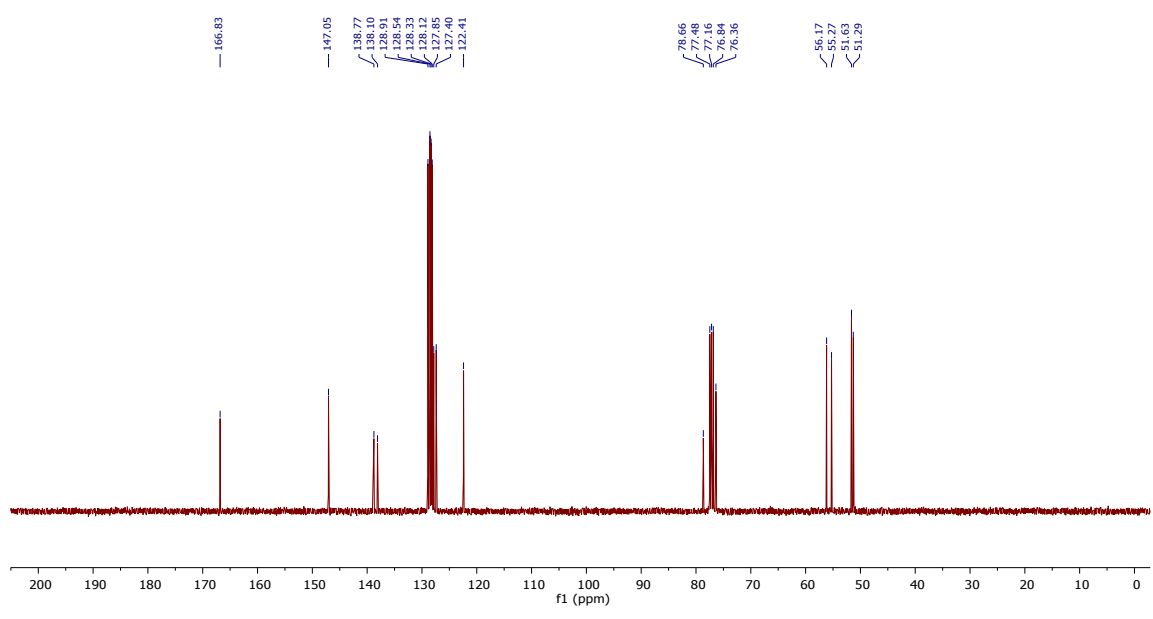

### HPLC trace of *rac-4b*

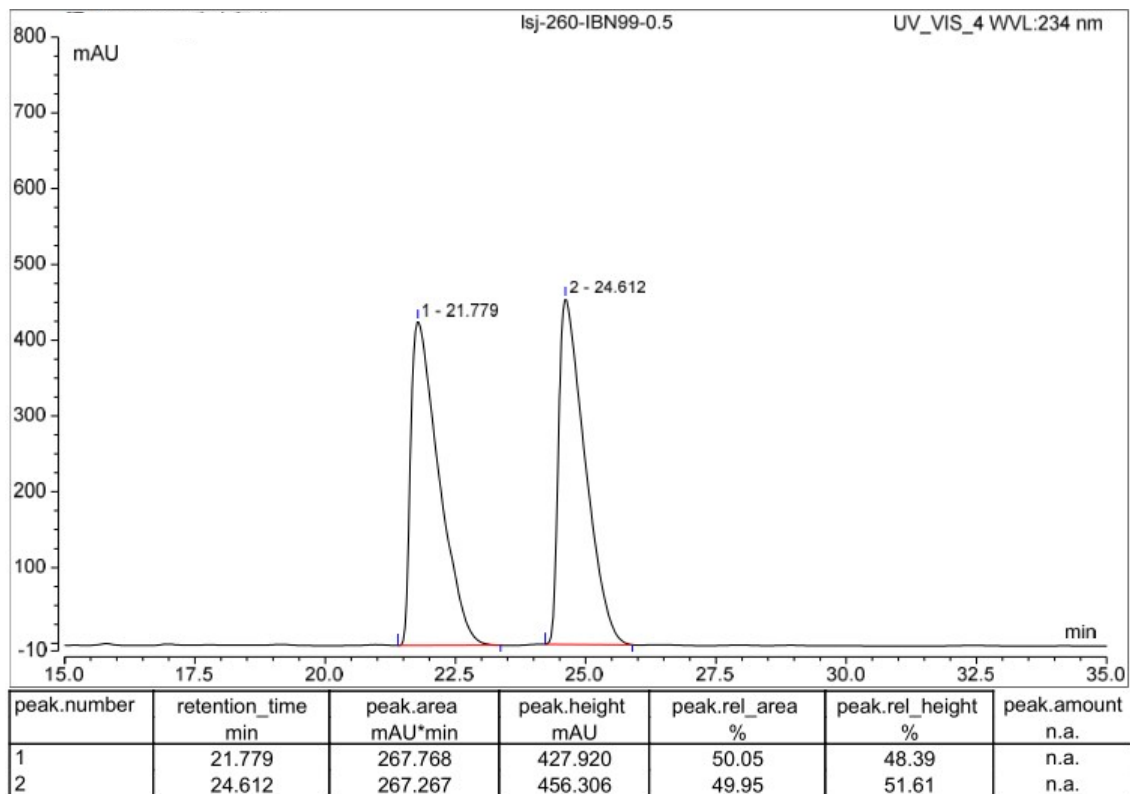

### HPLC trace of 4b

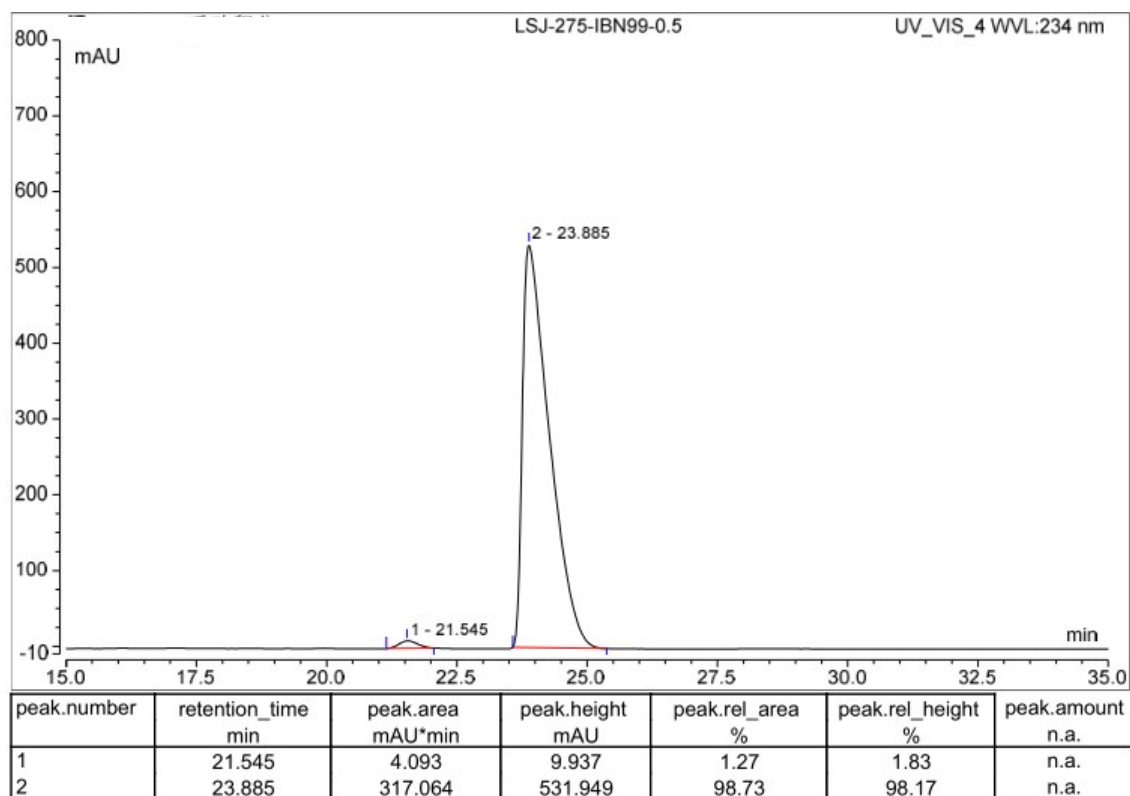

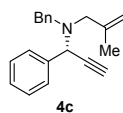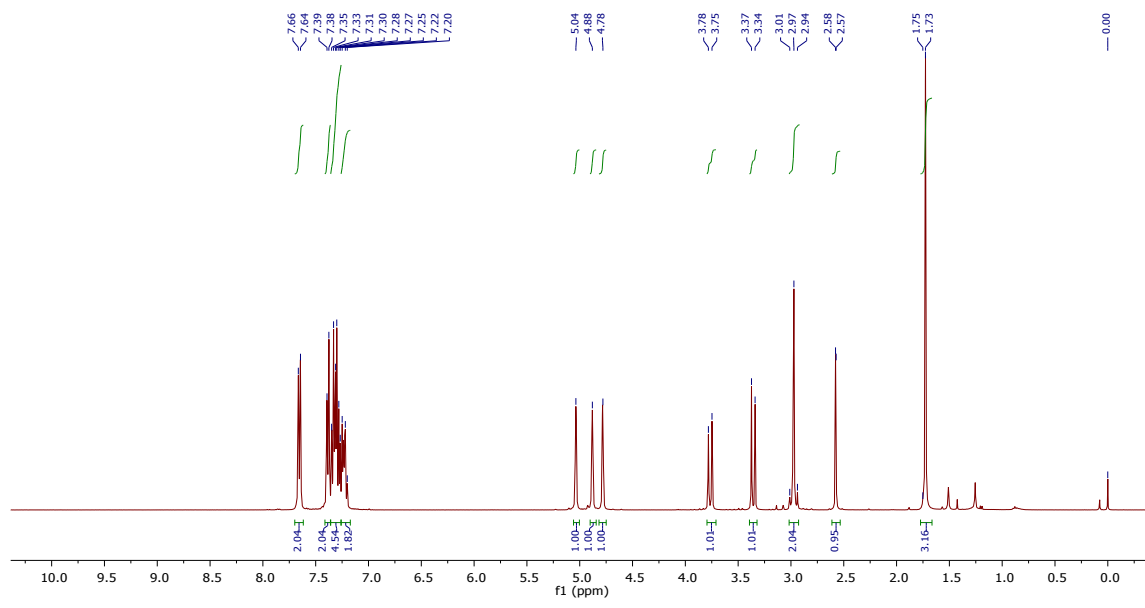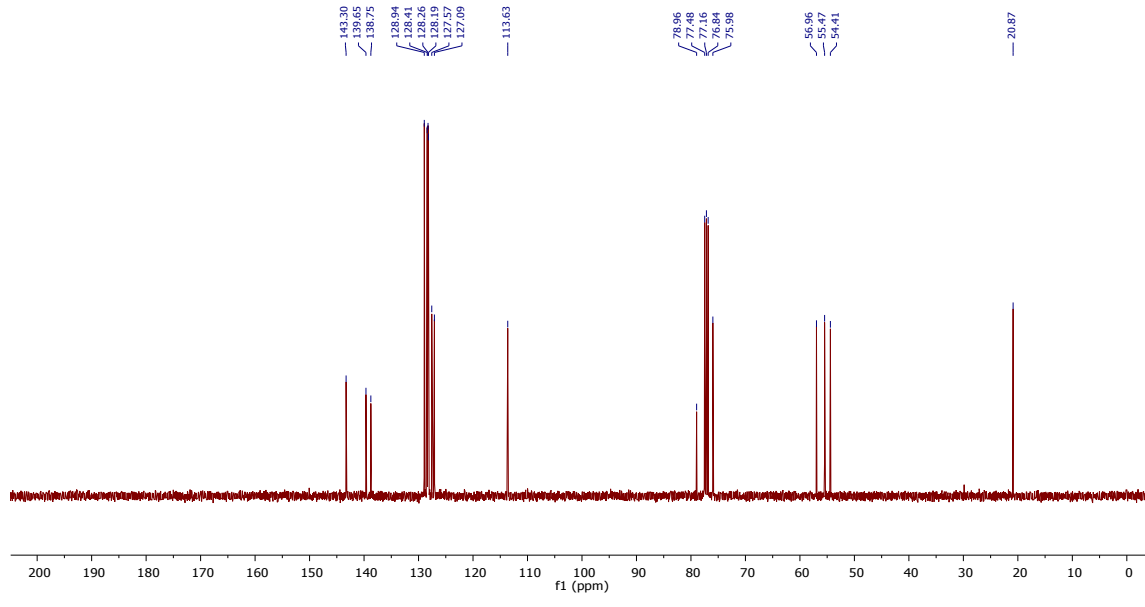



### HPLC trace of *rac-4c*

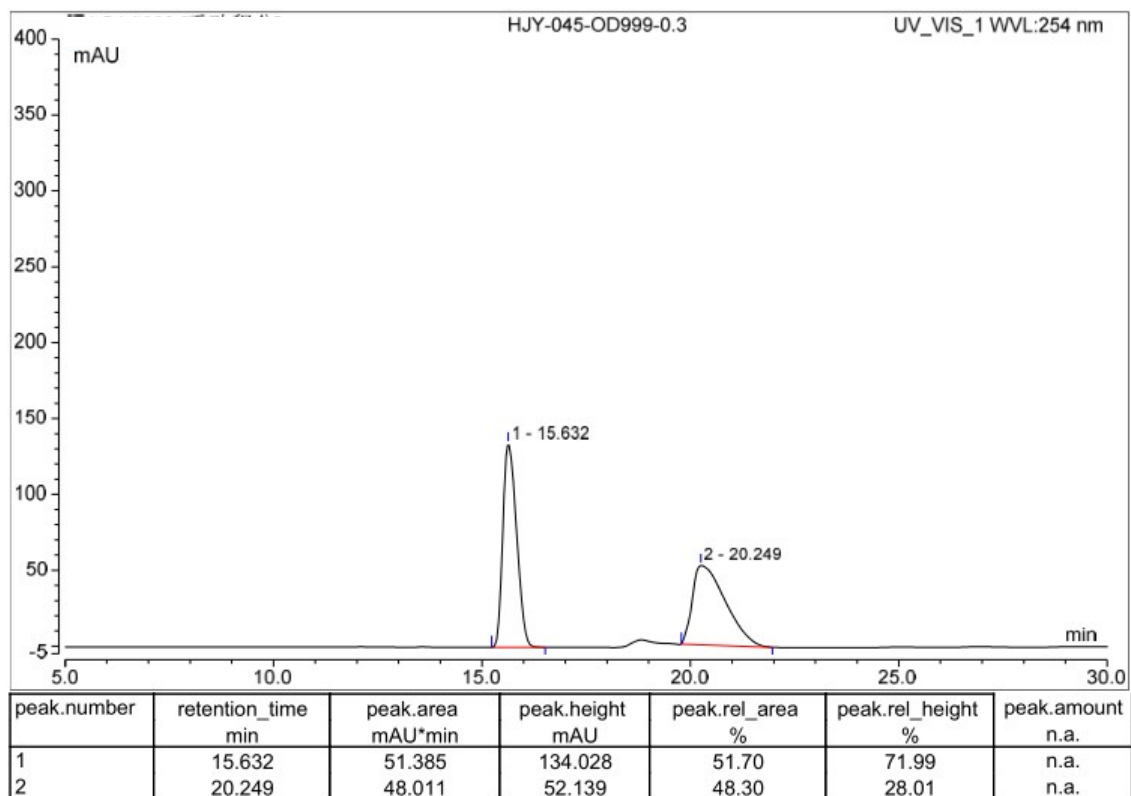

### HPLC trace of *4c*

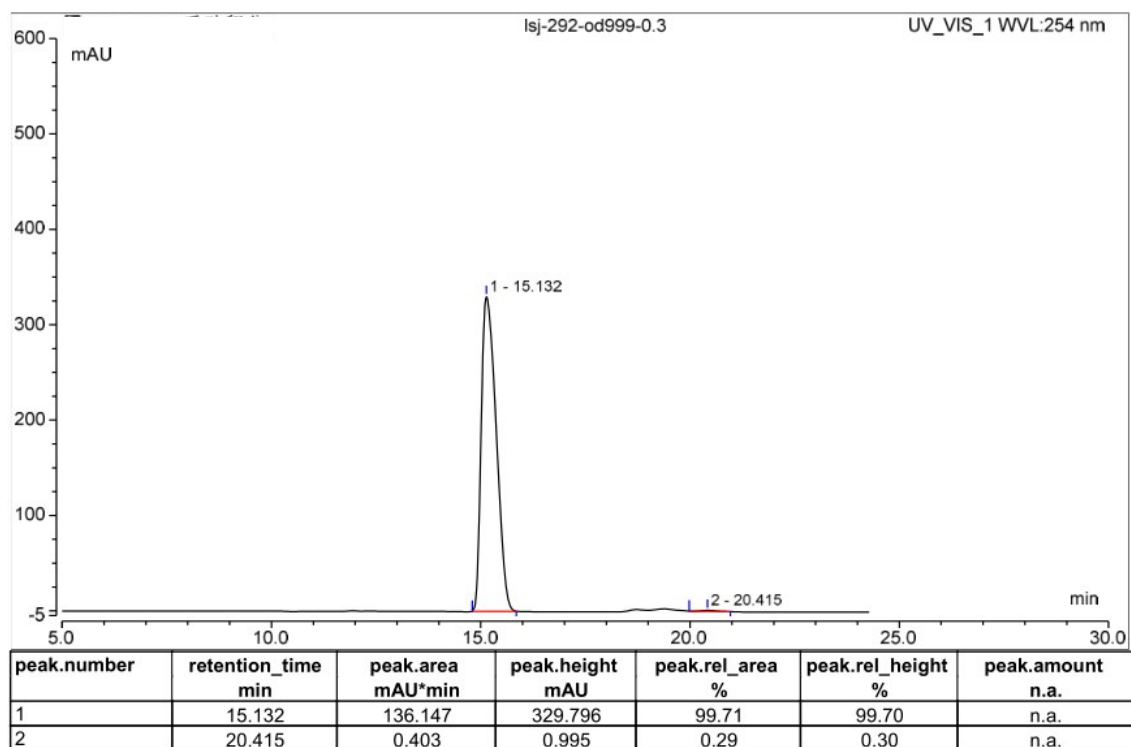

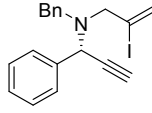

**4d**

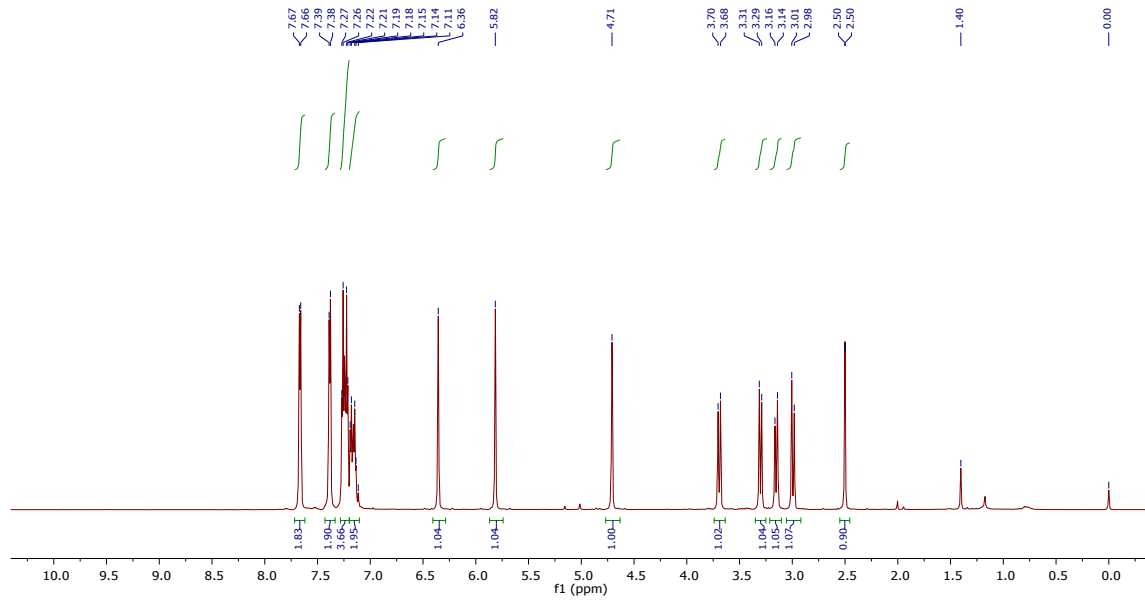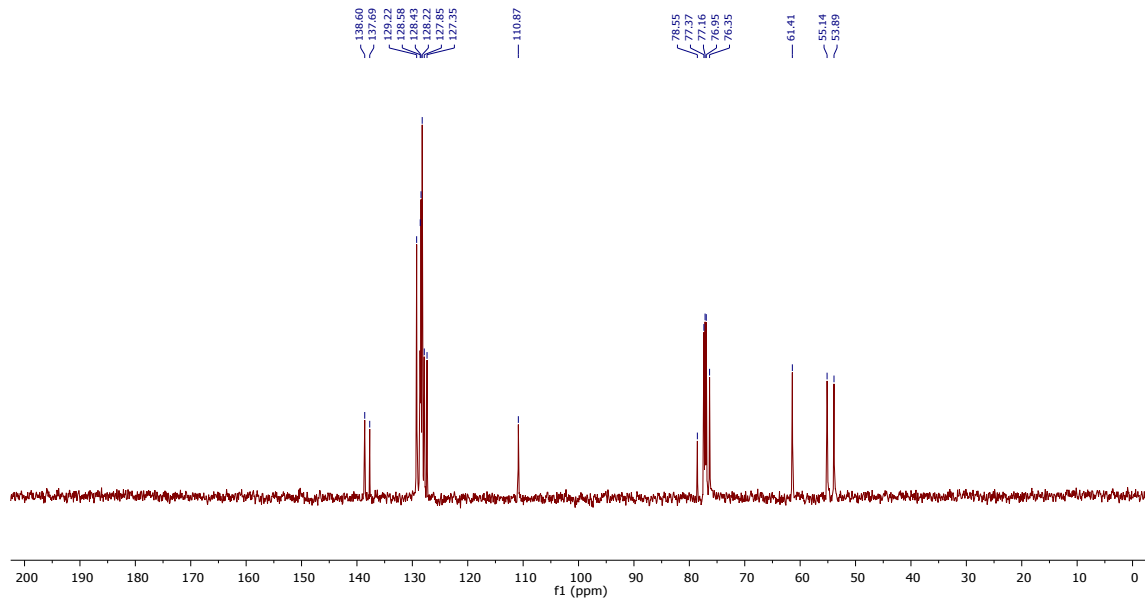

### HPLC trace of *rac-4d*

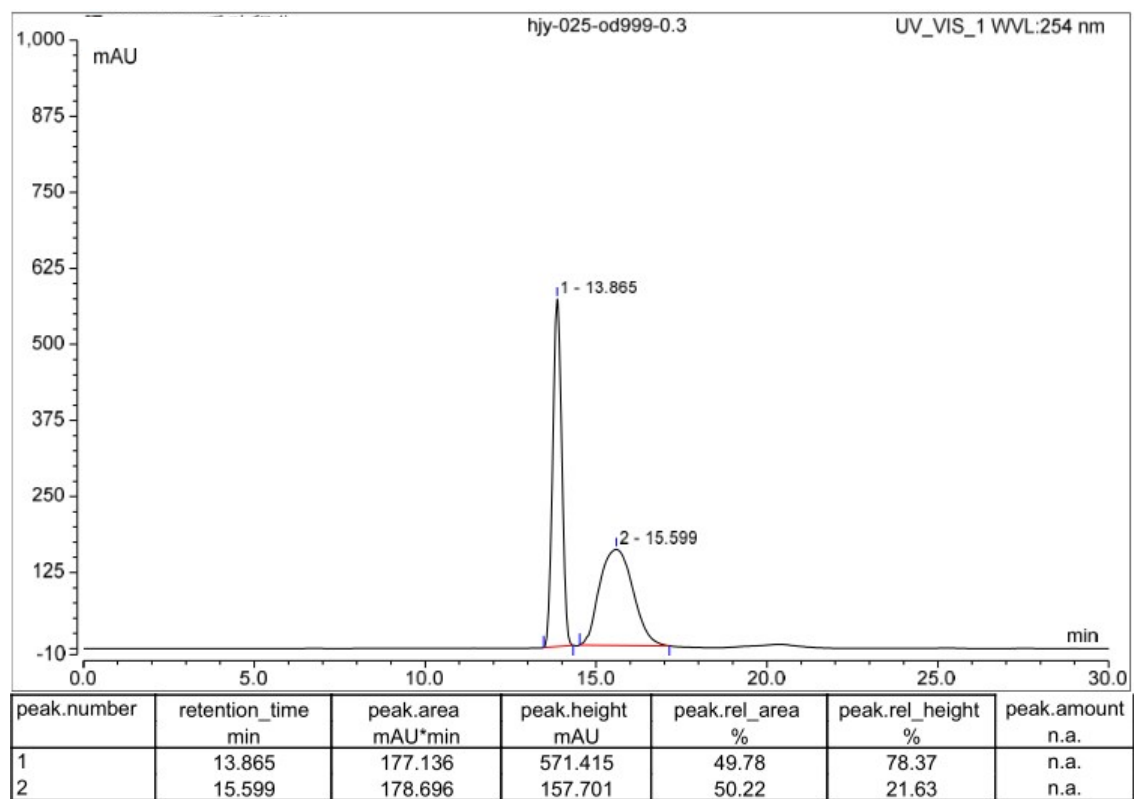

### HPLC trace of 4d

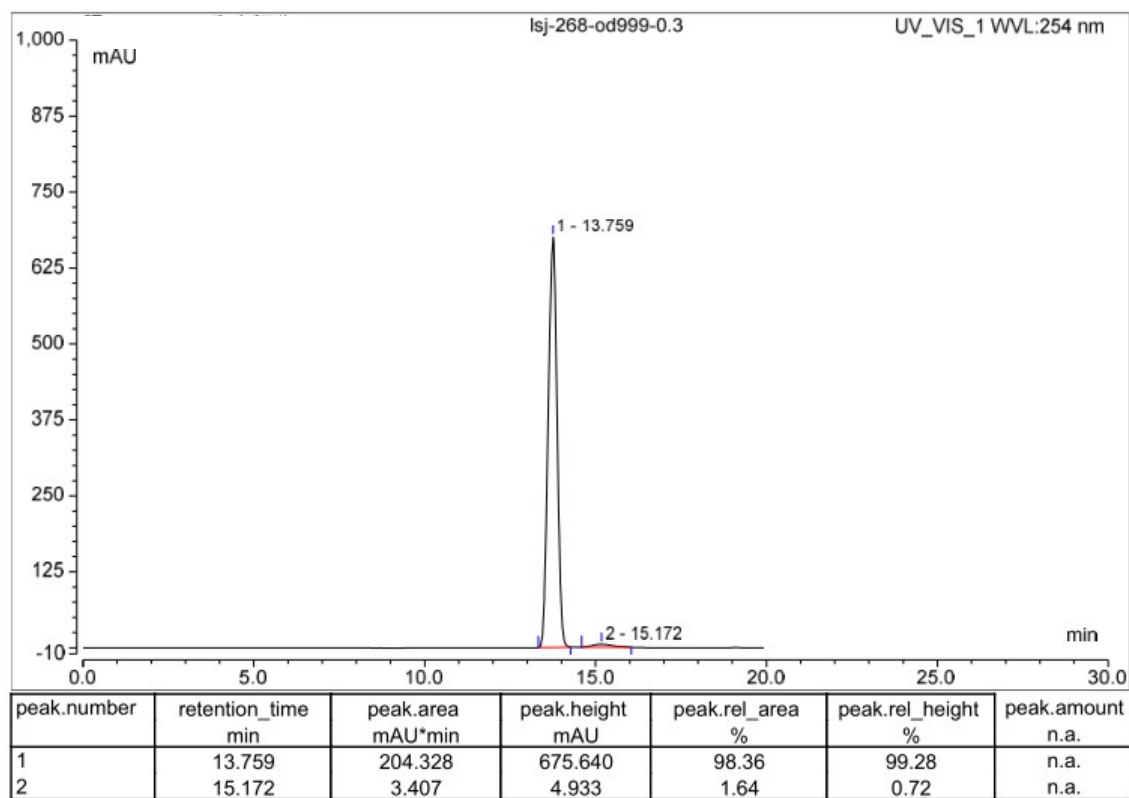

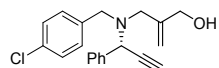

4e

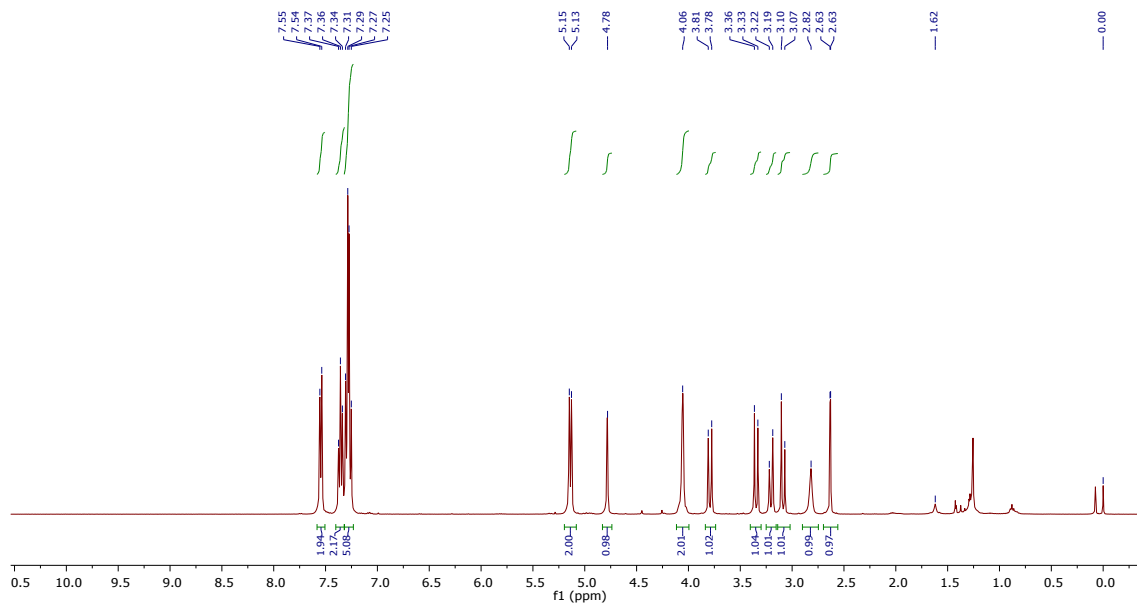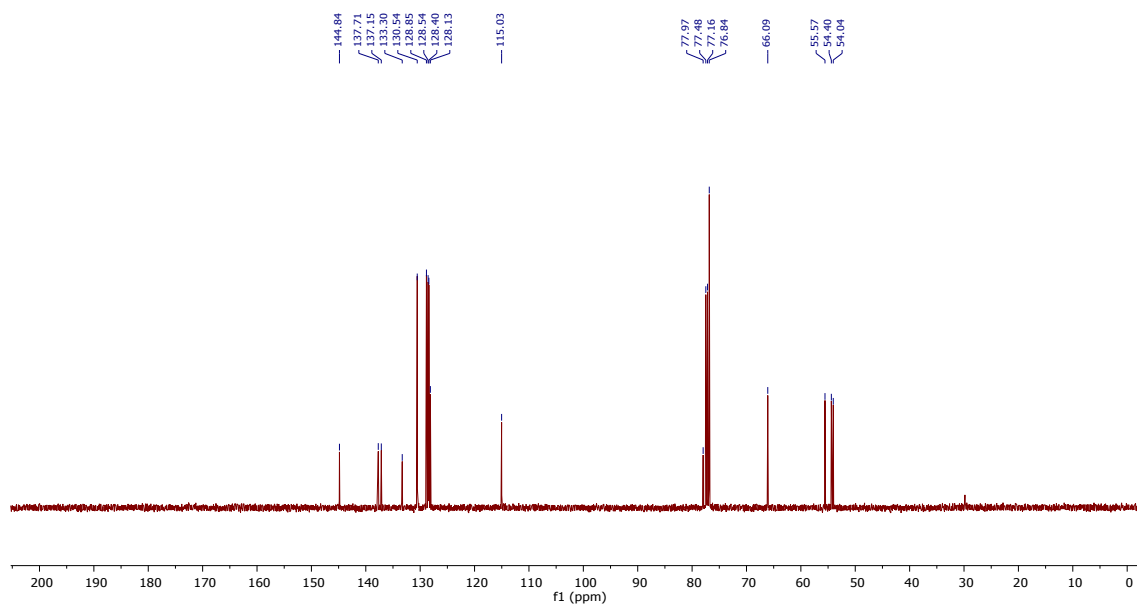

### HPLC trace of *rac-4e*

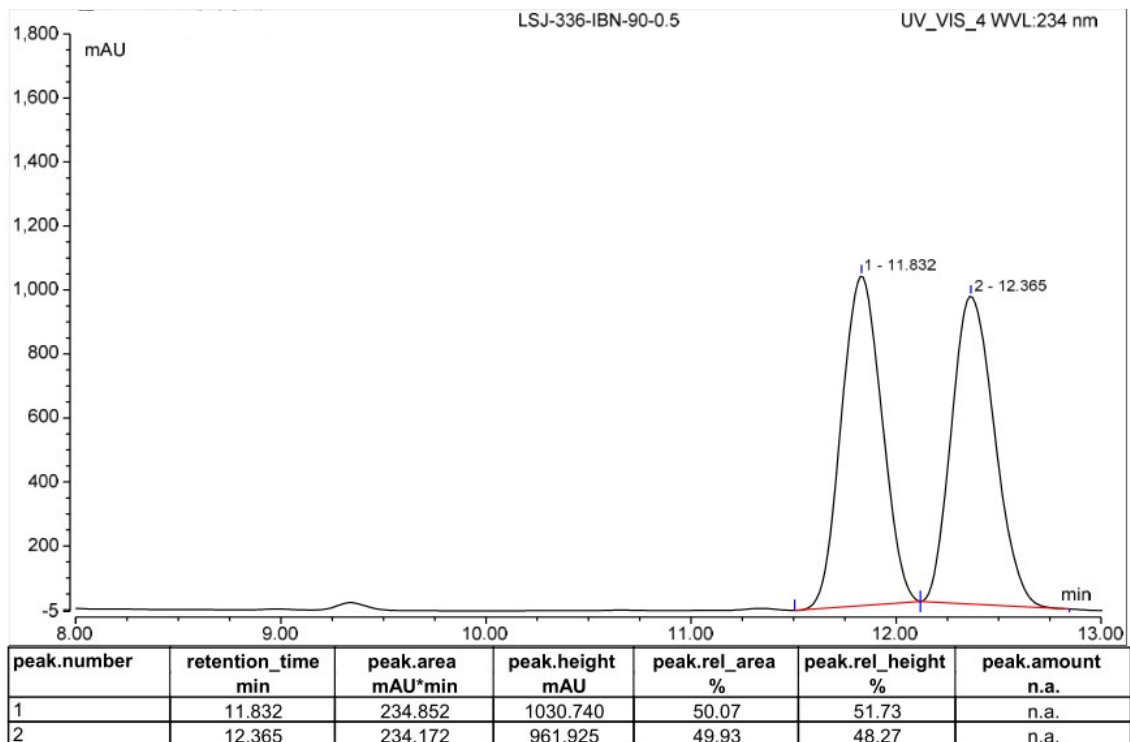

### HPLC trace of 4e

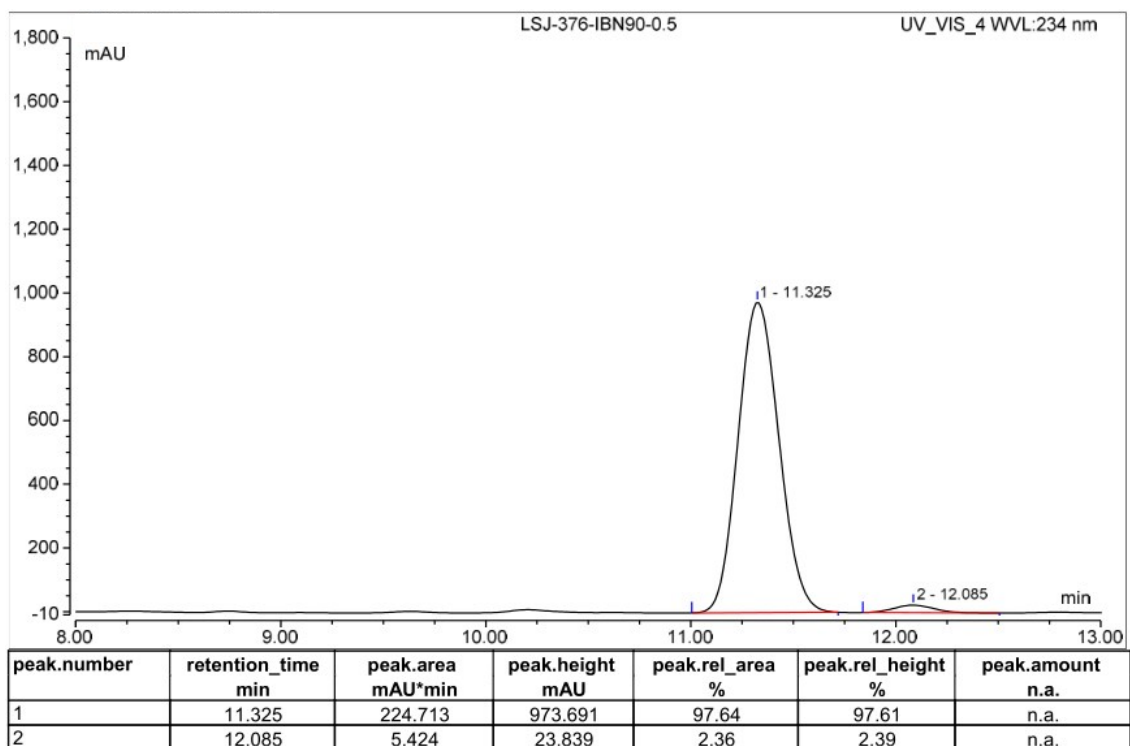

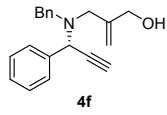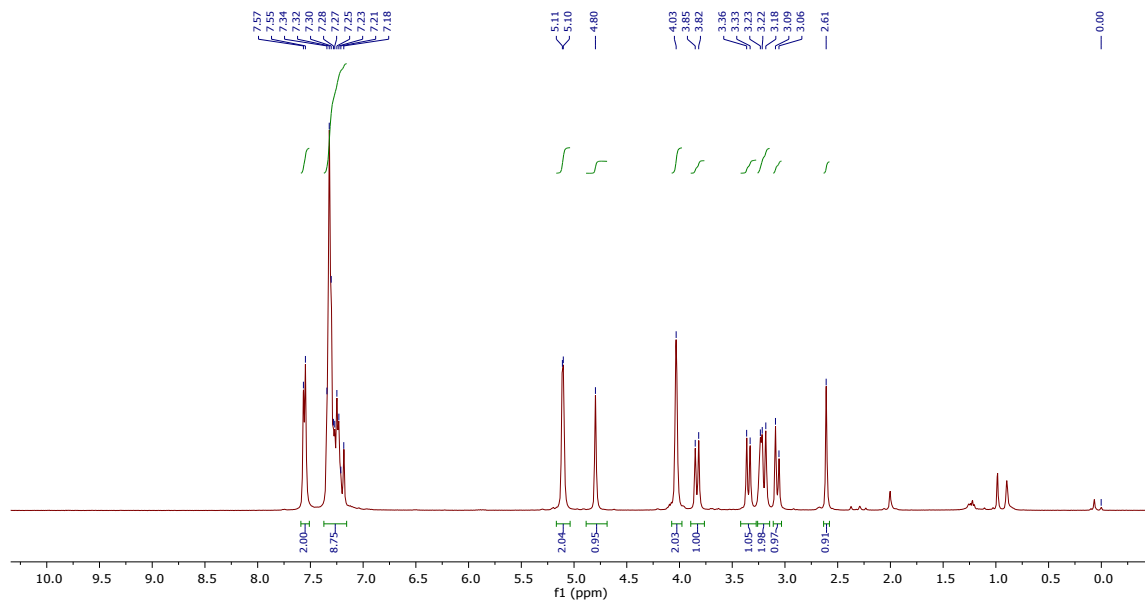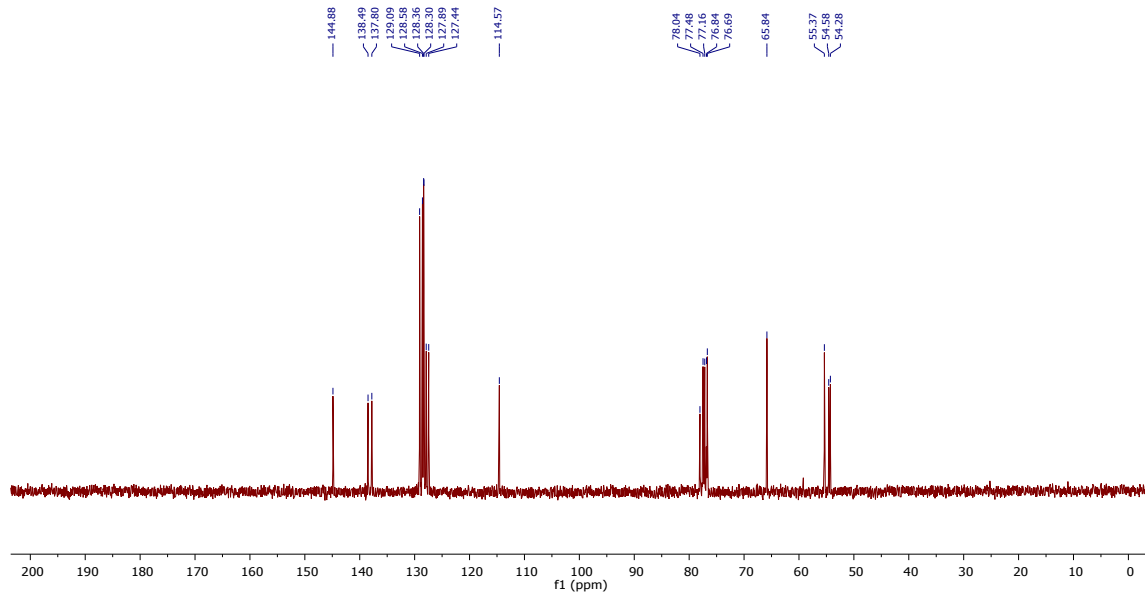

### HPLC trace of *rac-4f*

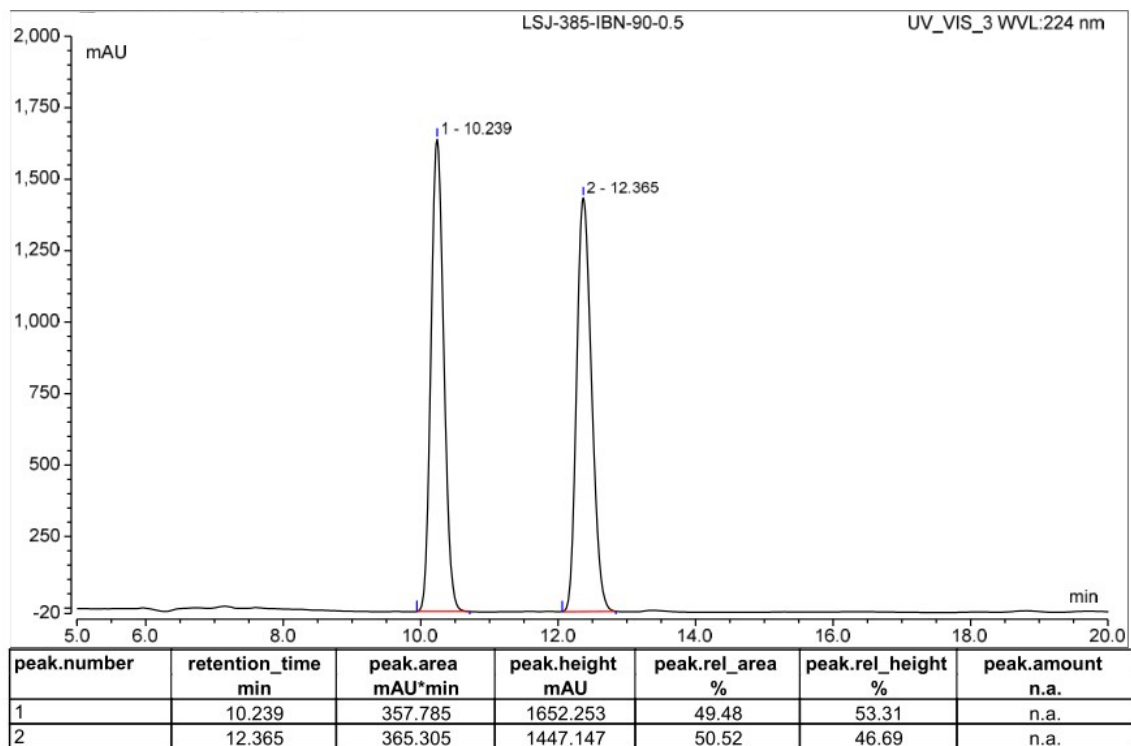

### HPLC trace of 4f

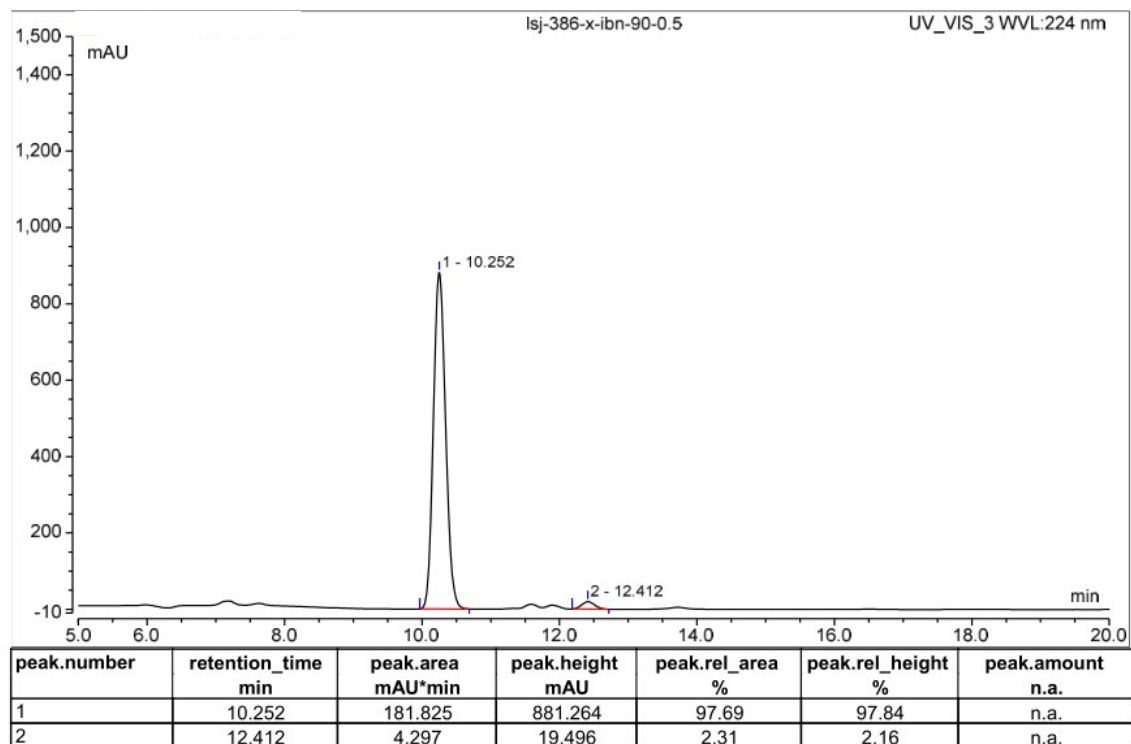

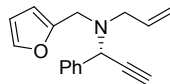

**4g**

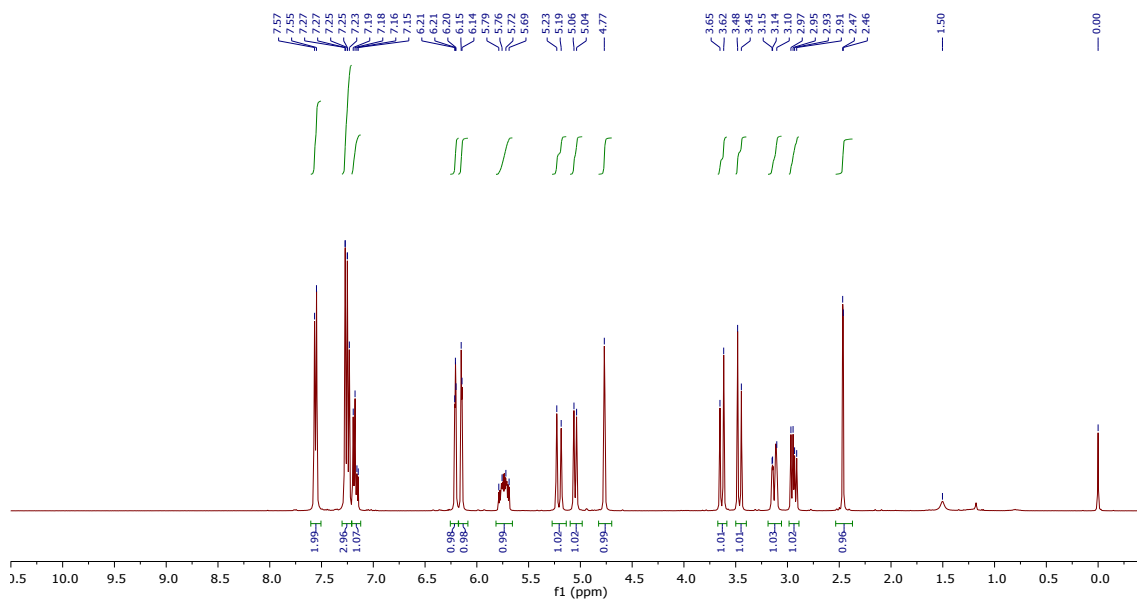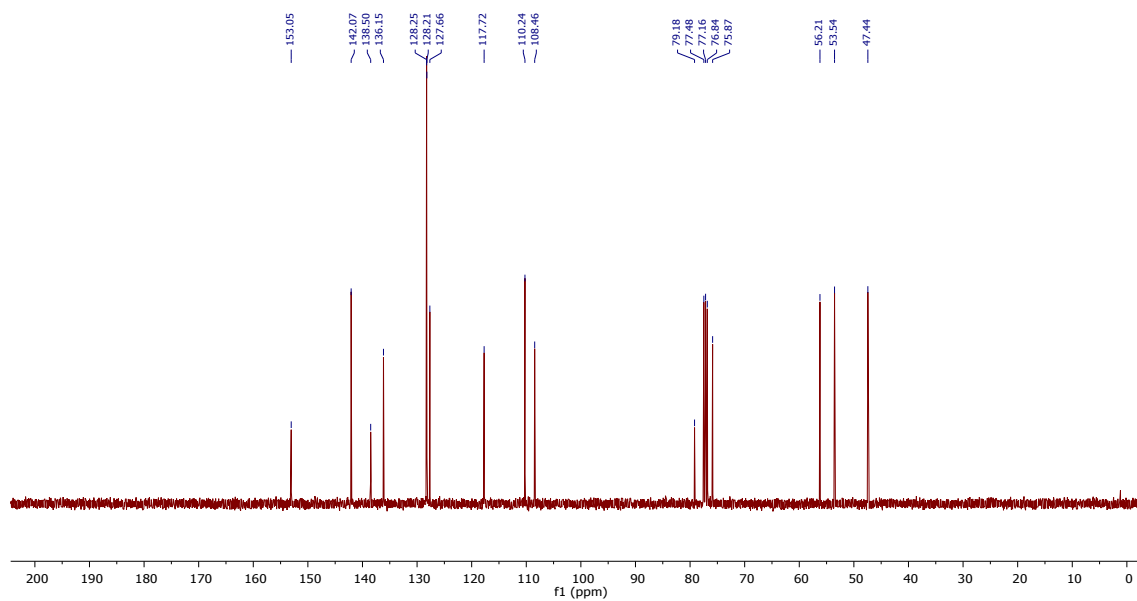



### HPLC trace of *rac-4g*

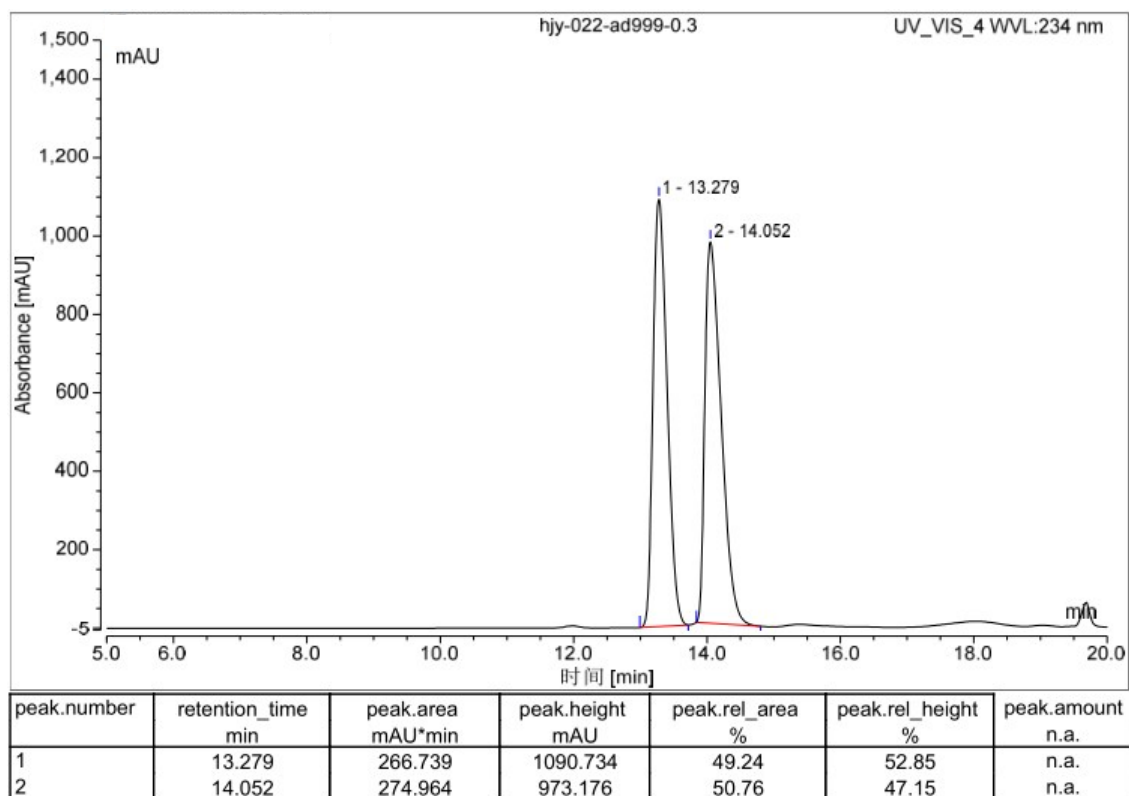

### HPLC trace of 4g

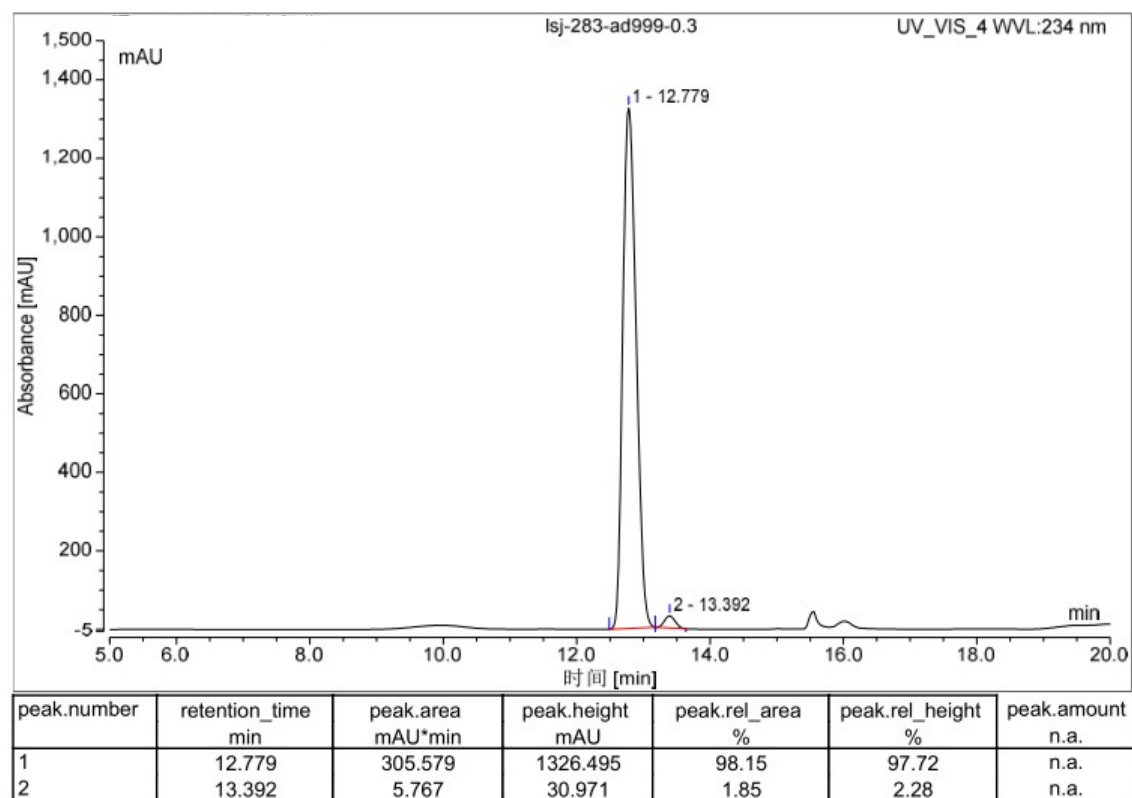

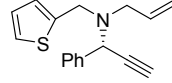

4h

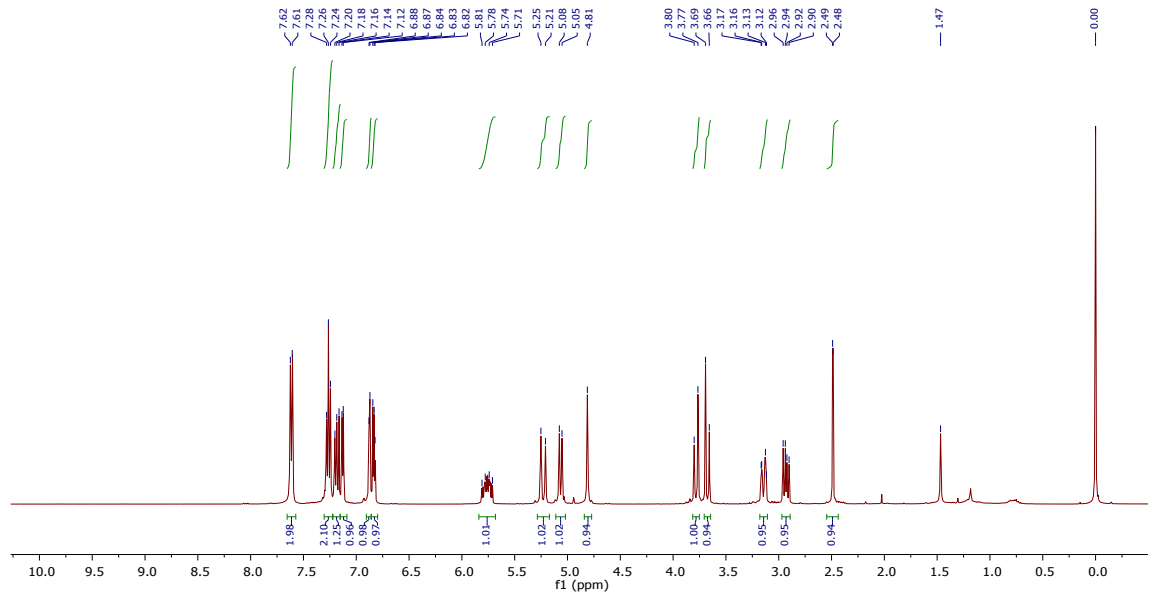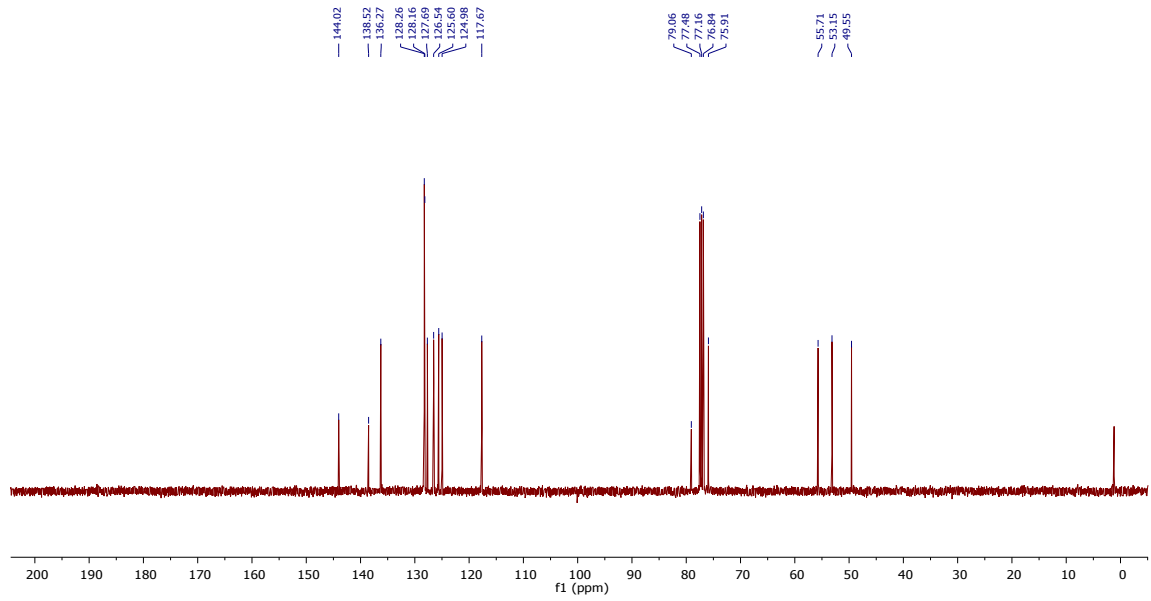

### HPLC trace of *rac-4h*

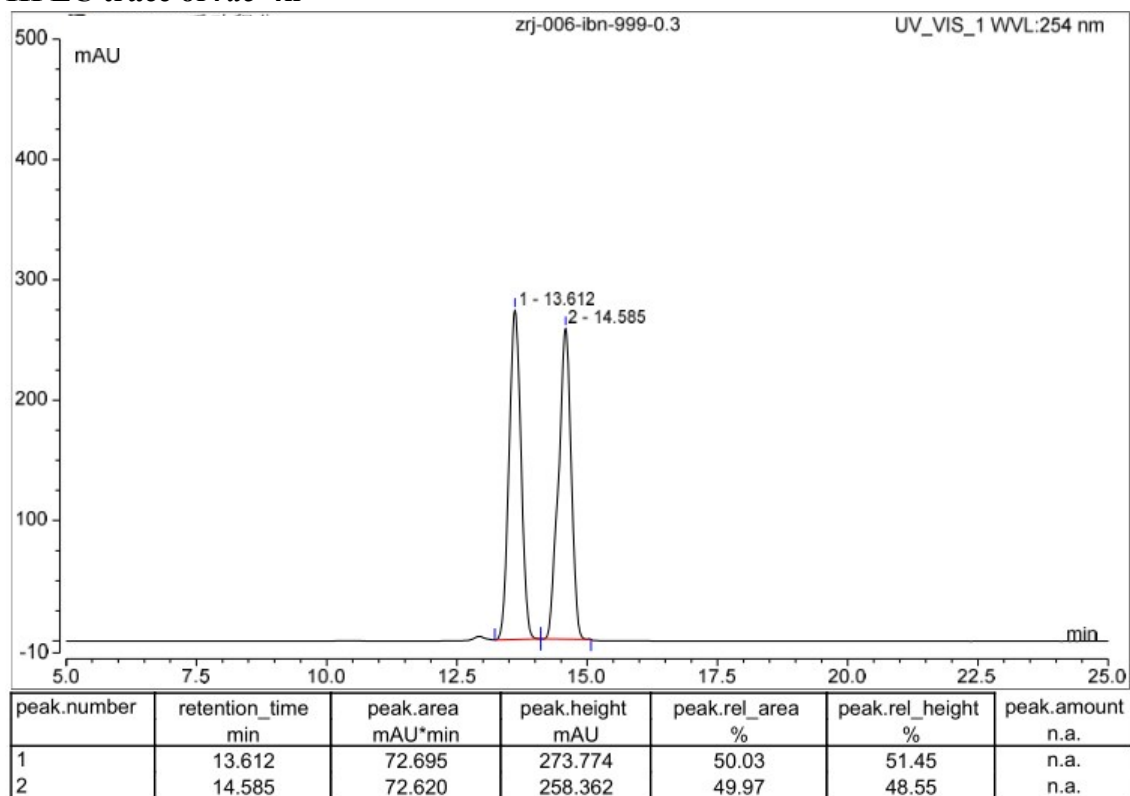

### HPLC trace of 4h

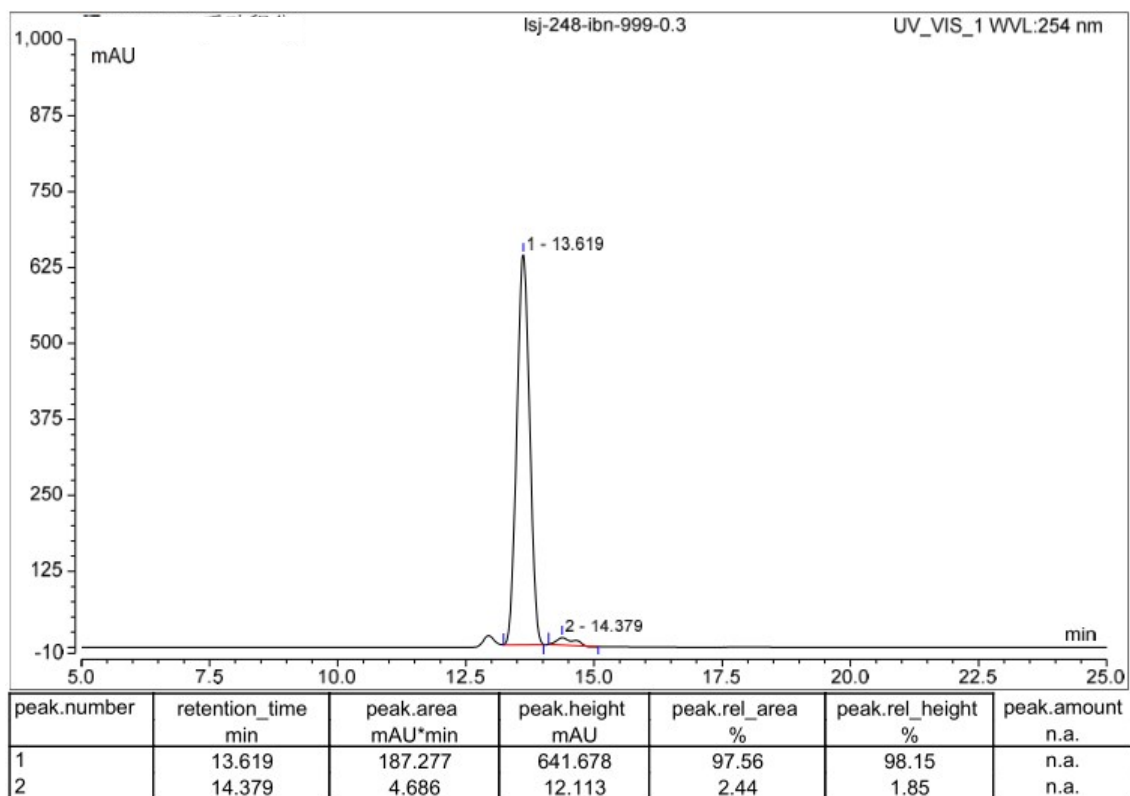

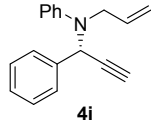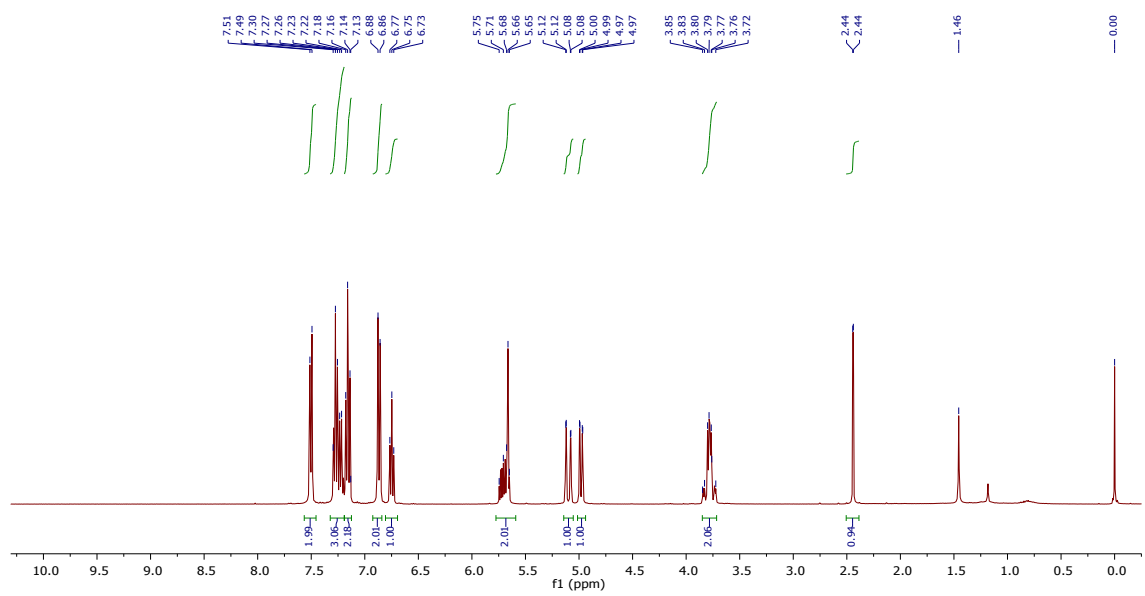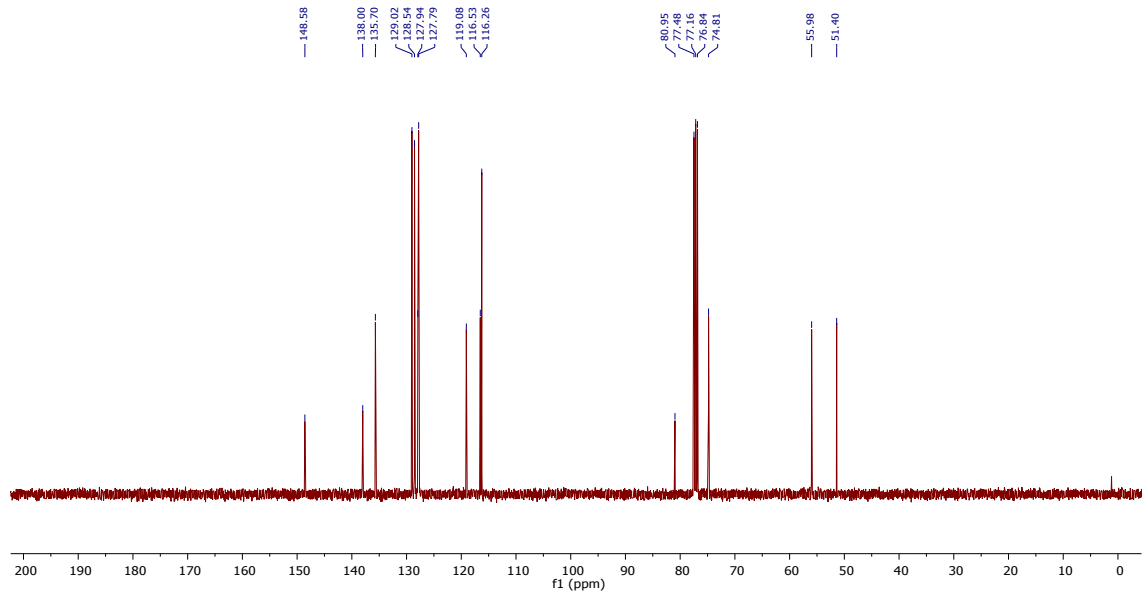

### HPLC trace of *rac-4i*

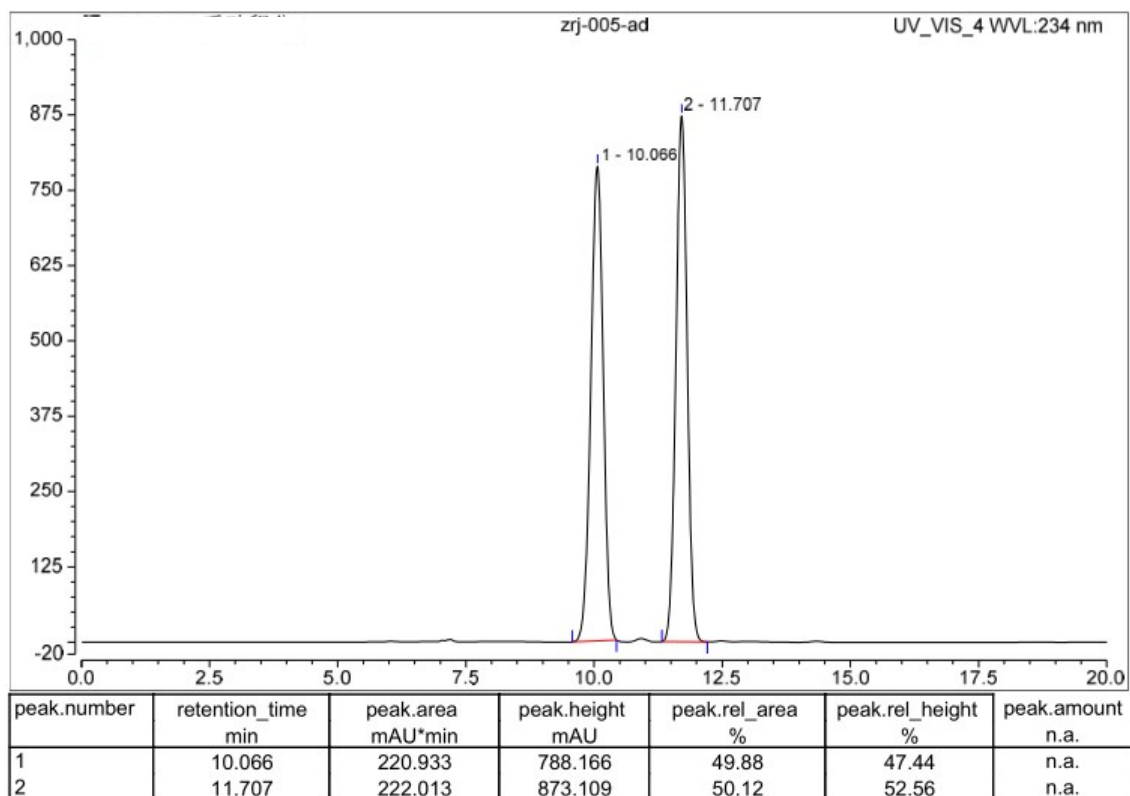

### HPLC trace of *4i*

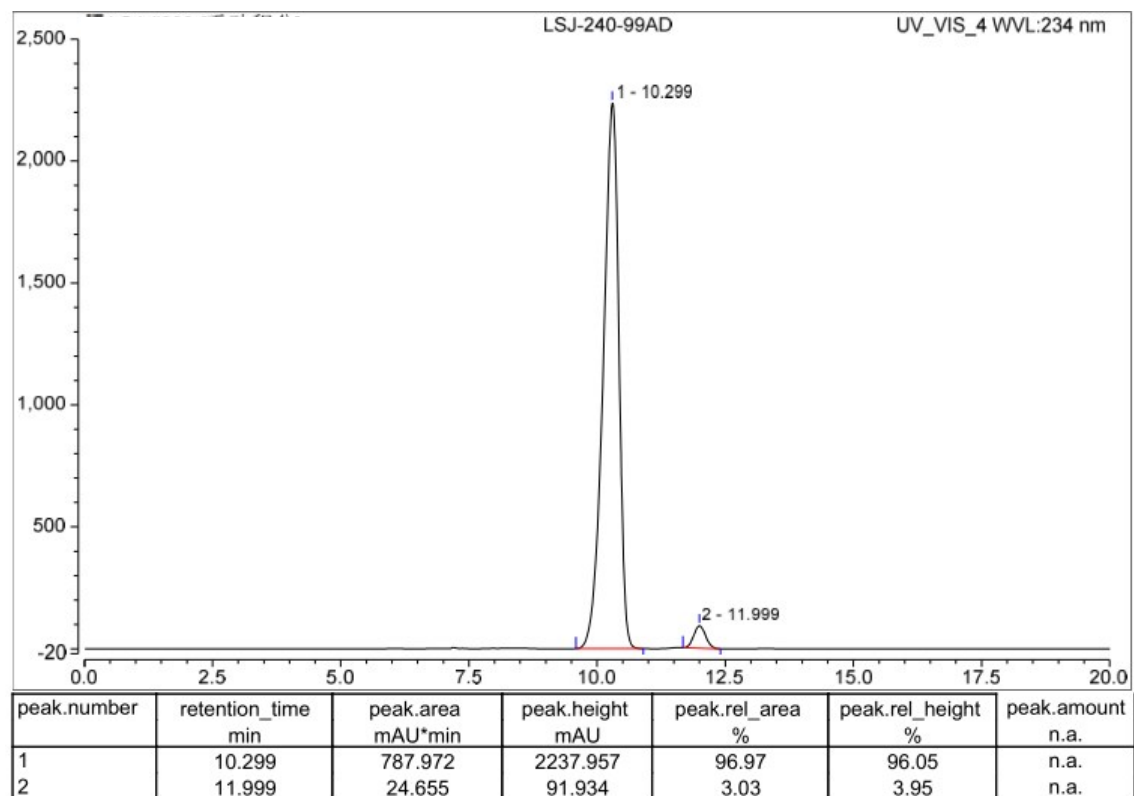

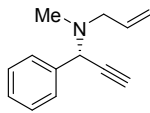

4j

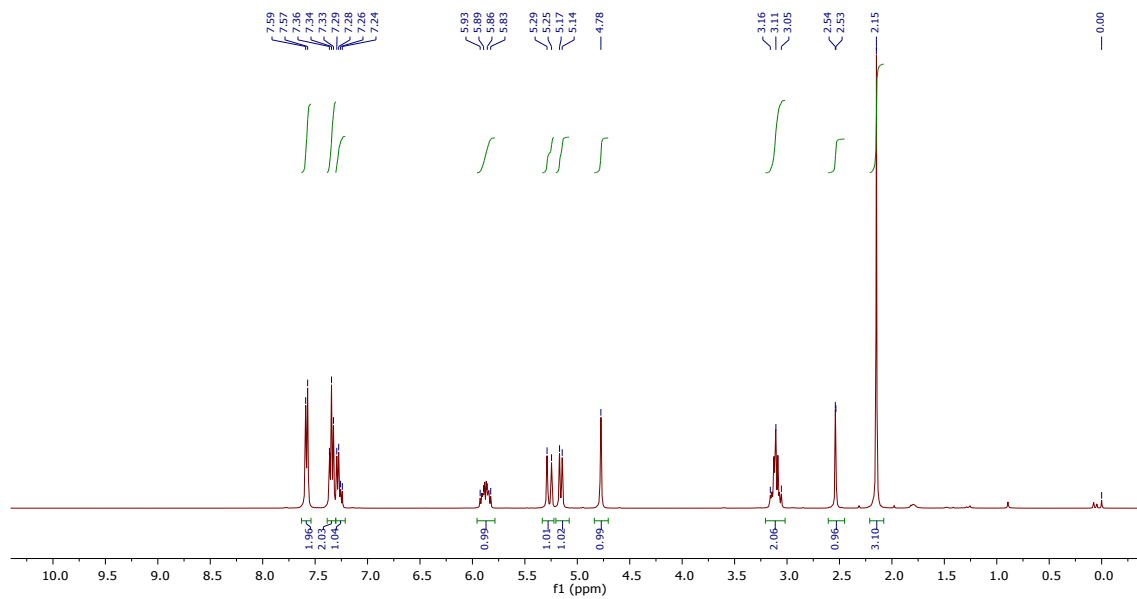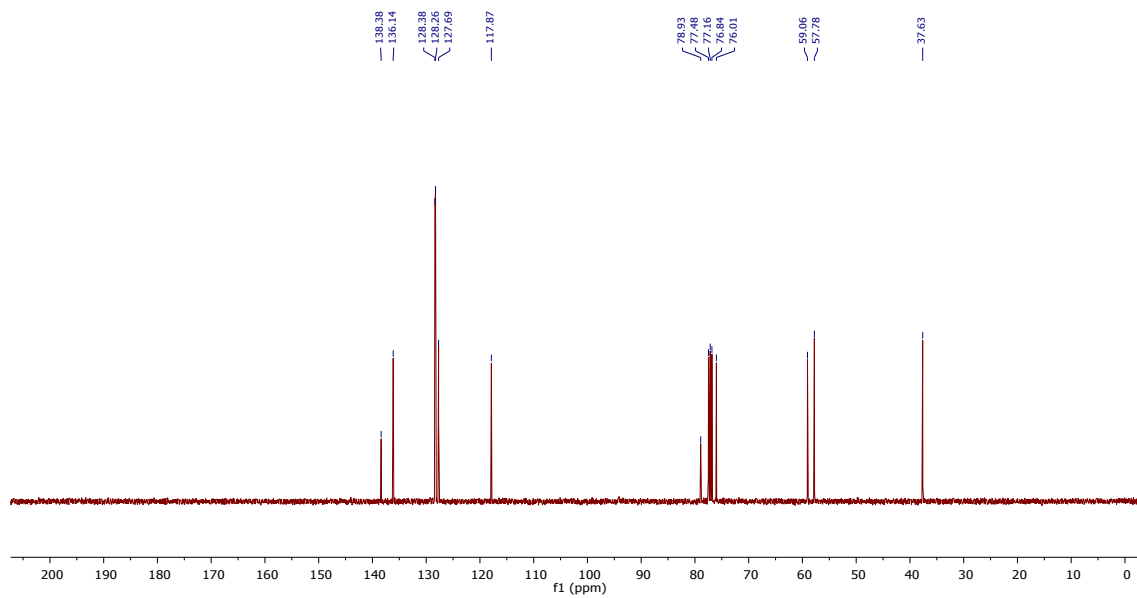

### HPLC trace of *rac-4j*

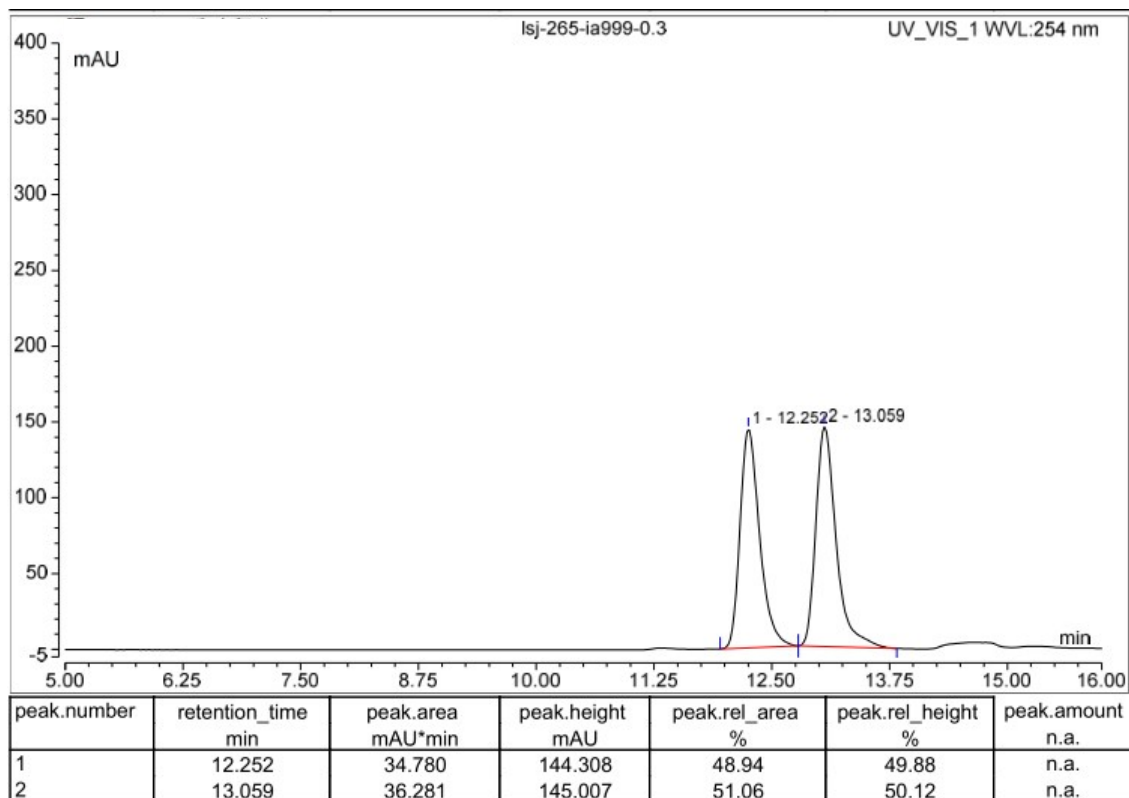

### HPLC trace of 4j

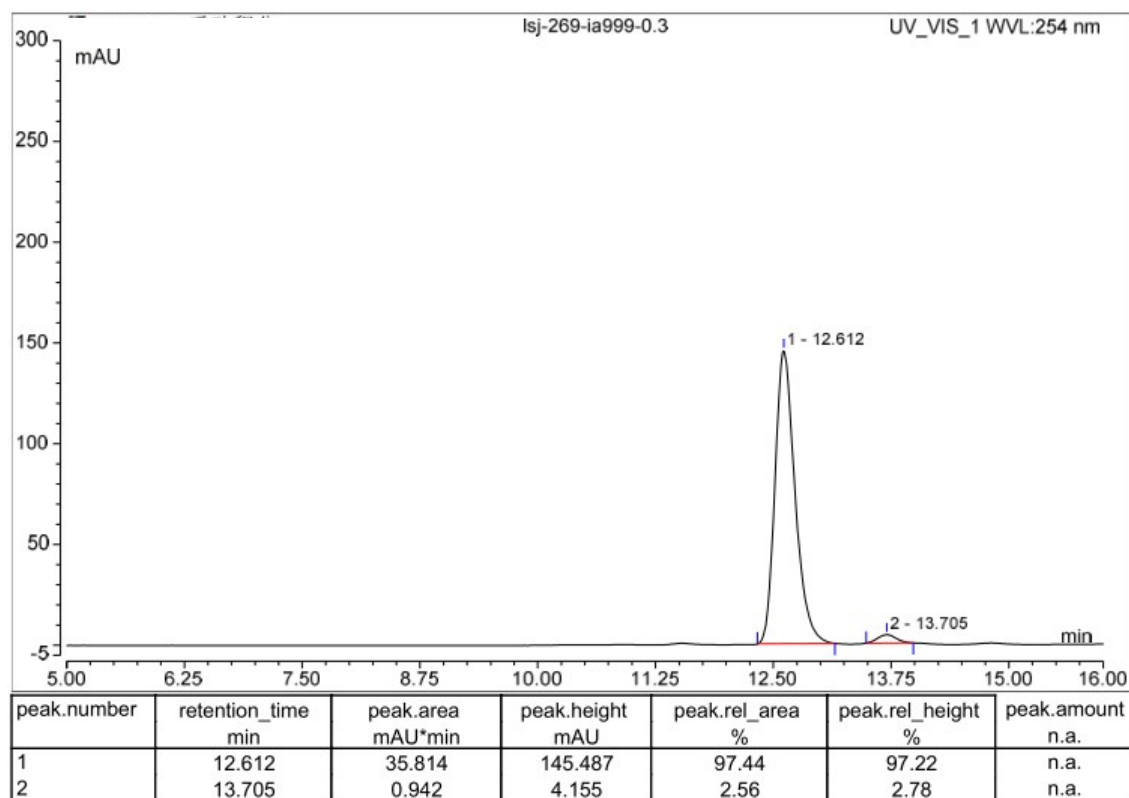

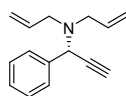

4k

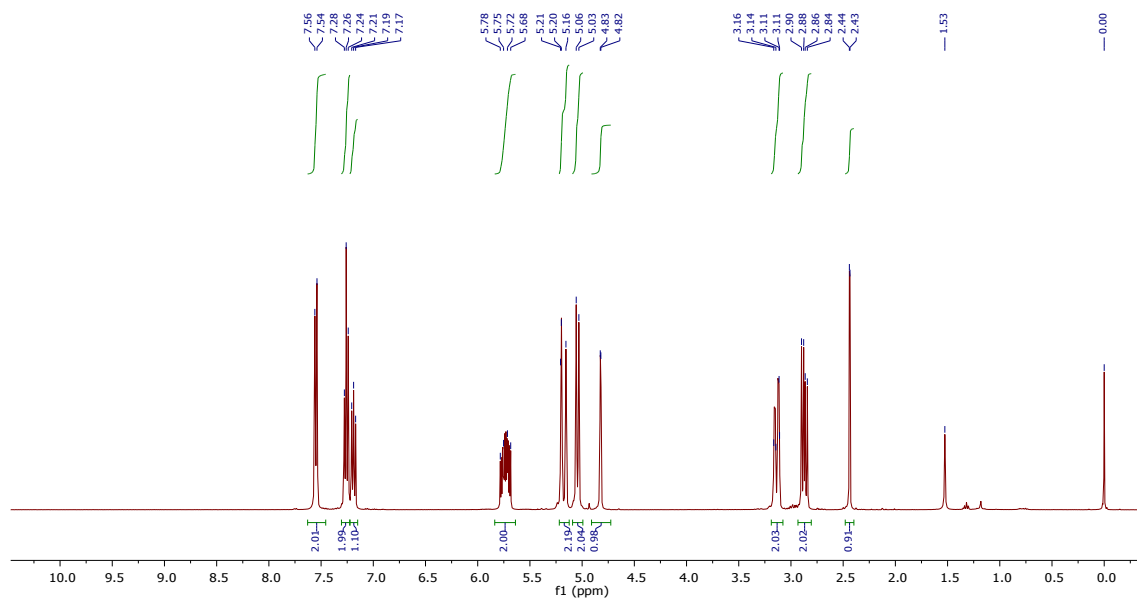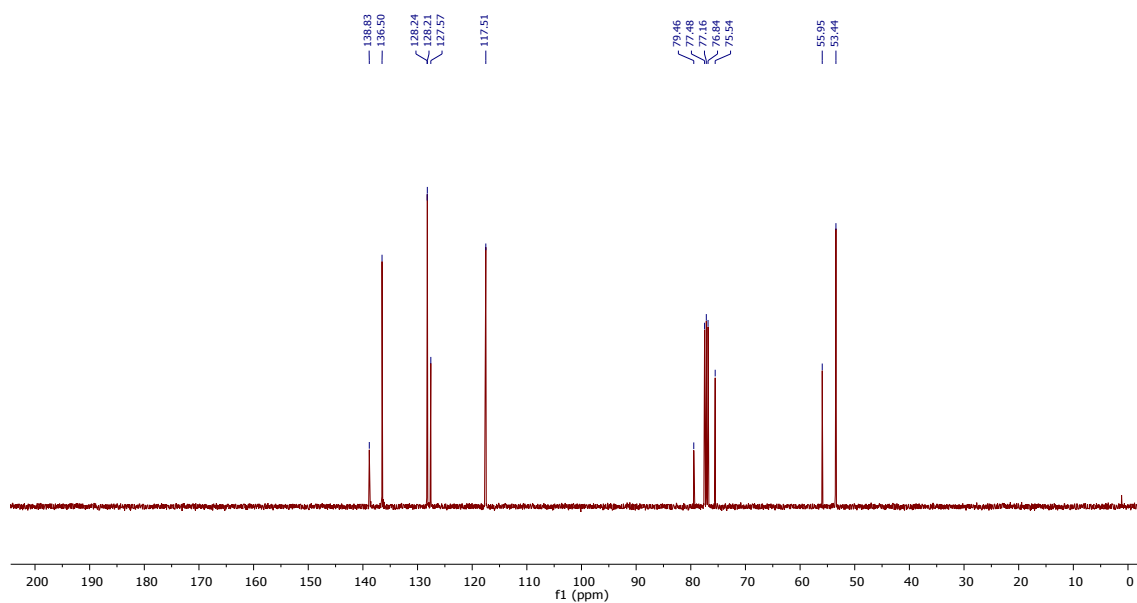



### HPLC trace of *rac-4k*

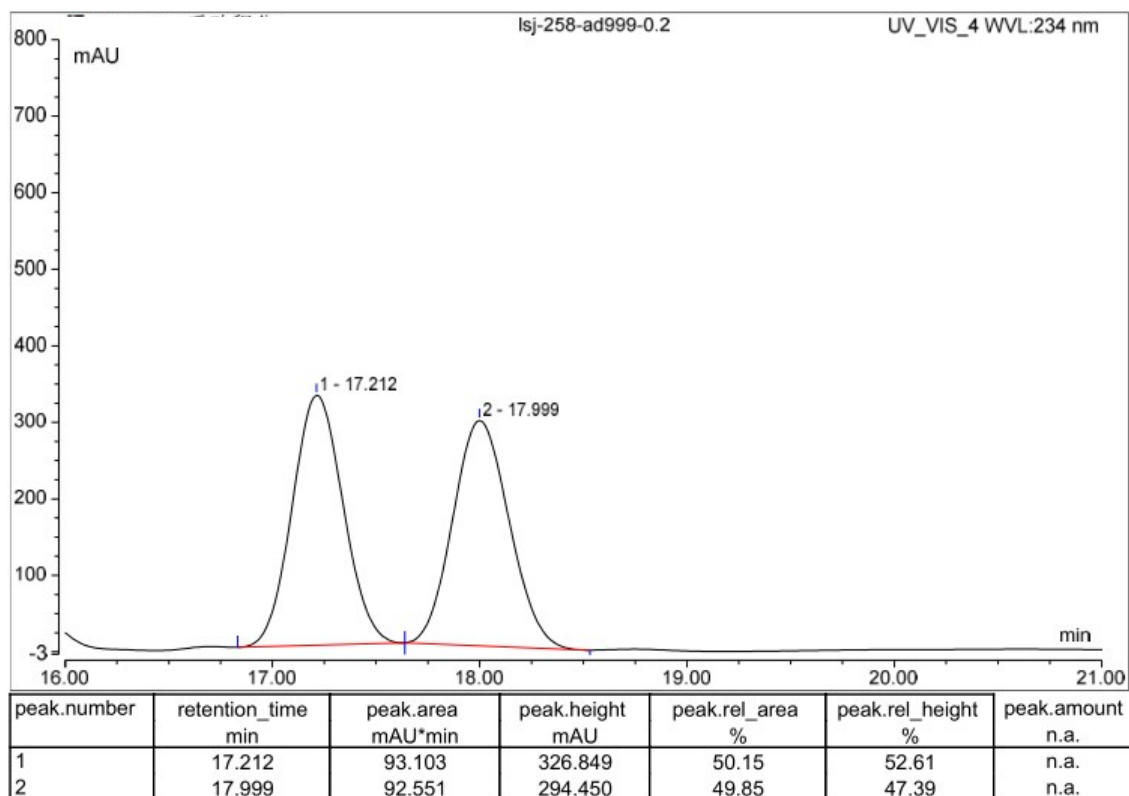

### HPLC trace of 4k

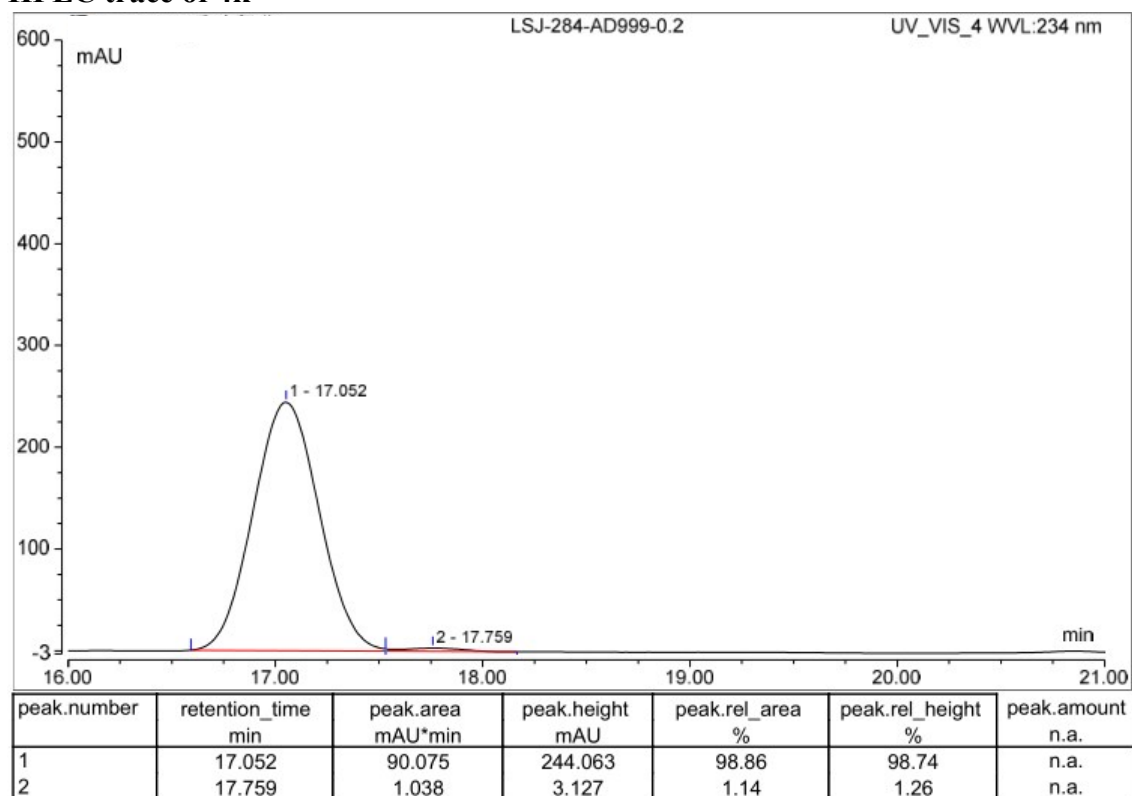

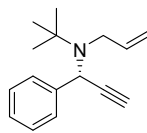

4I

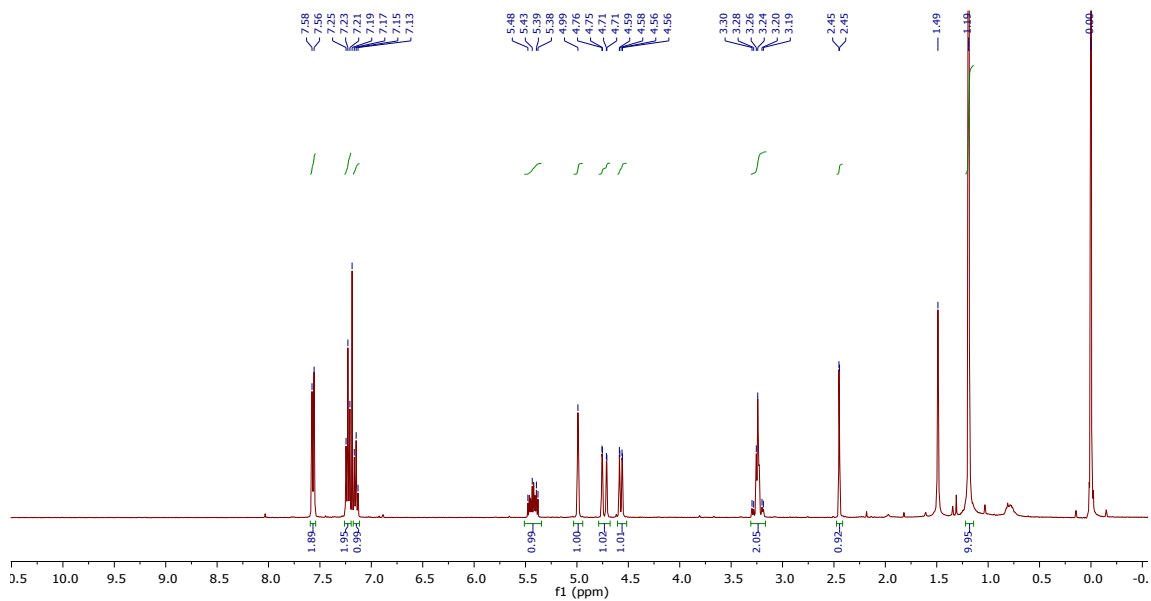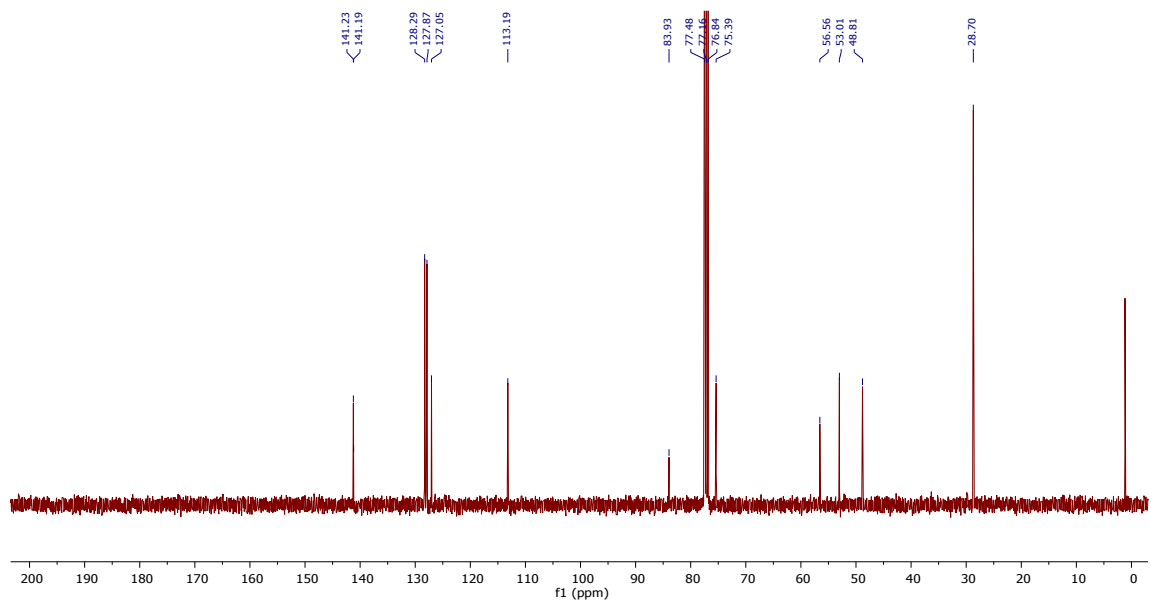

### HPLC trace of *rac-4l*

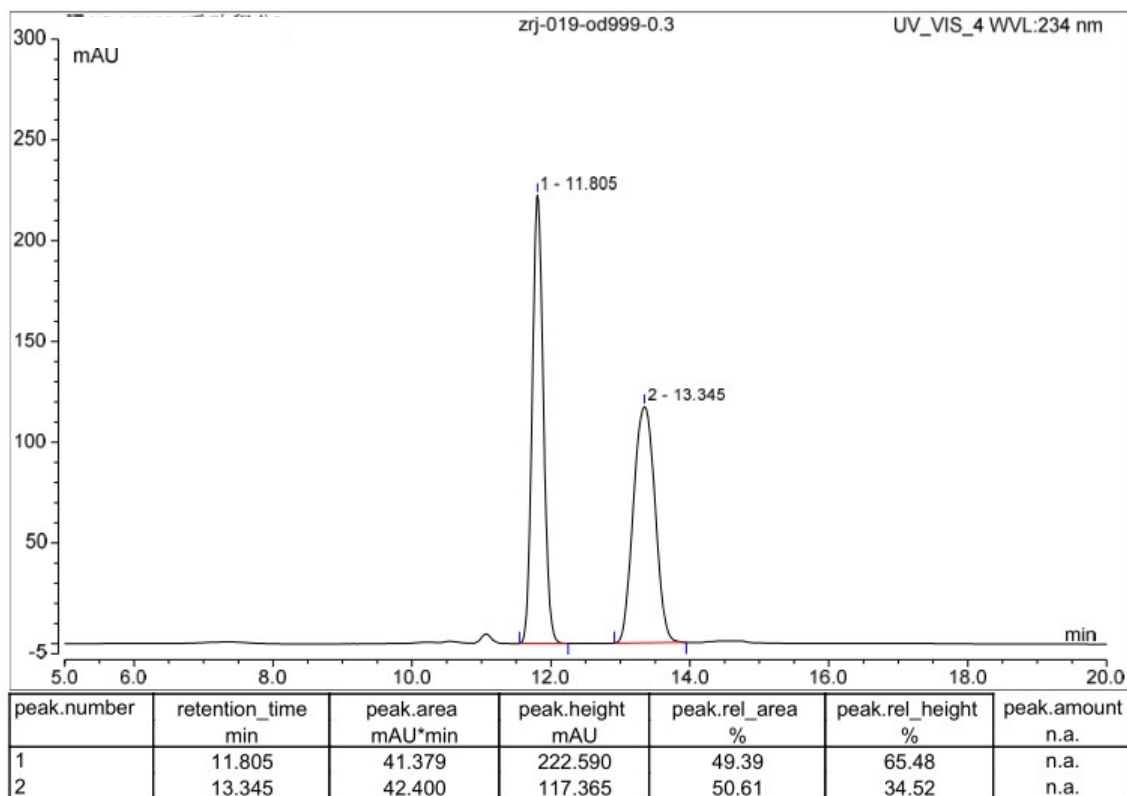

### HPLC trace of 4l

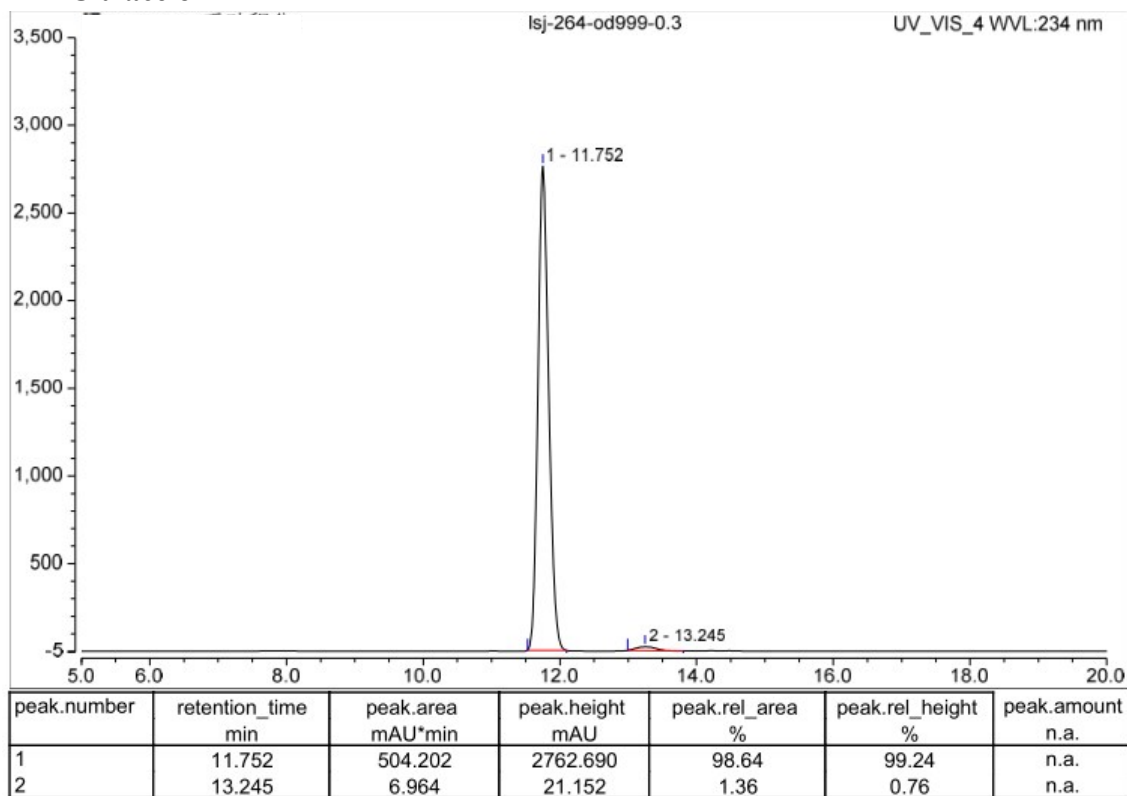

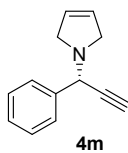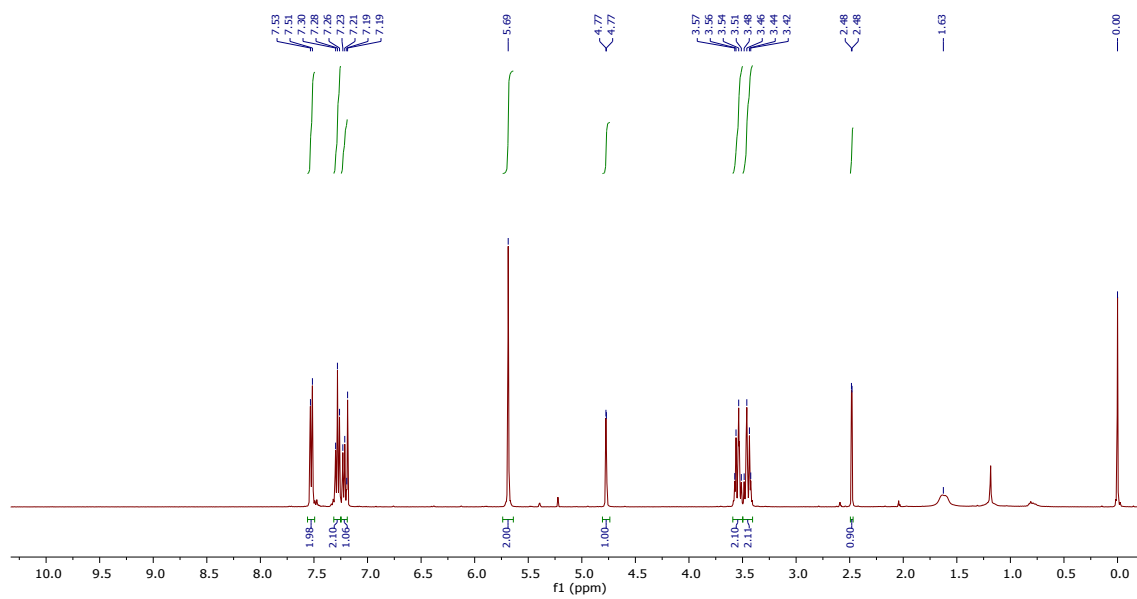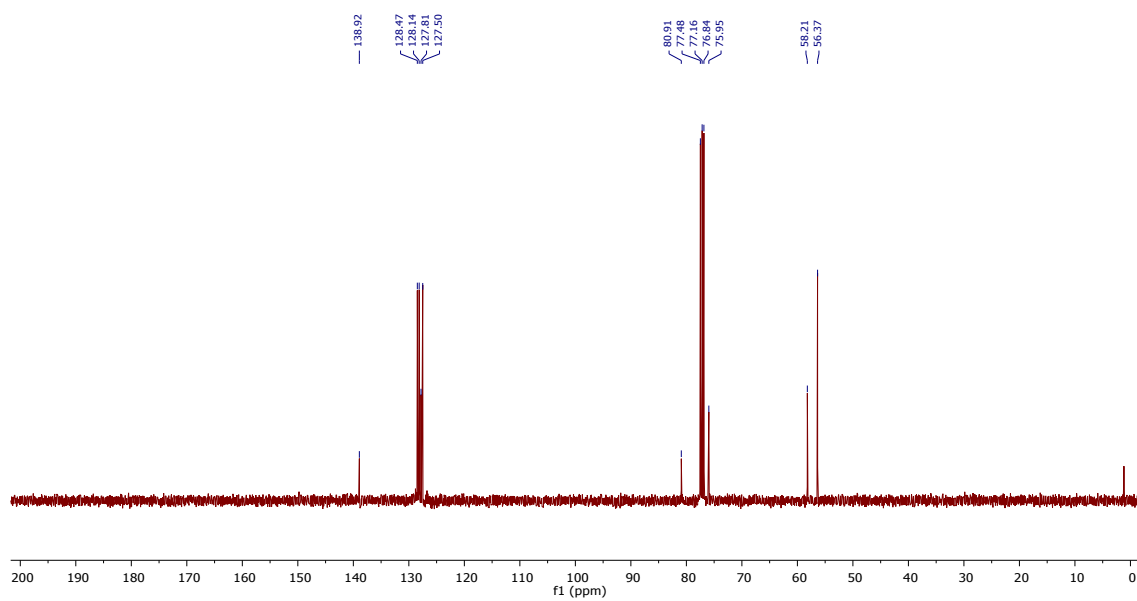

### HPLC trace of *rac*-4m

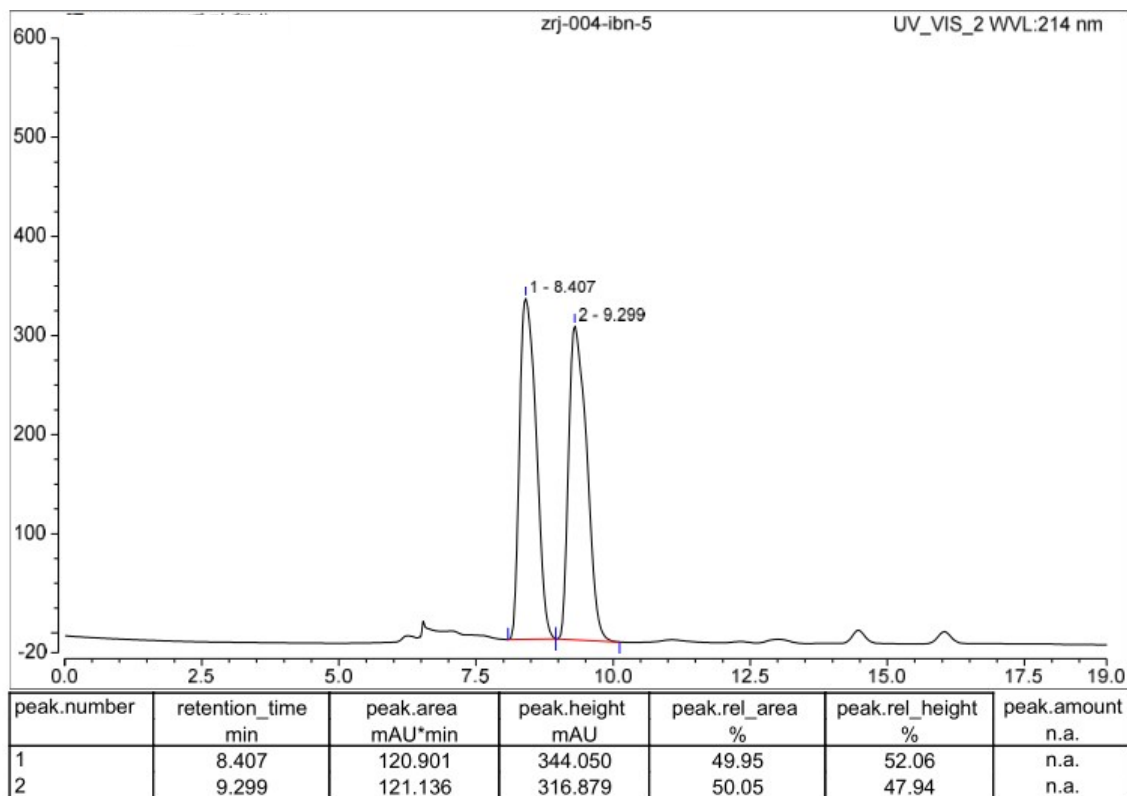

### HPLC trace of 4m

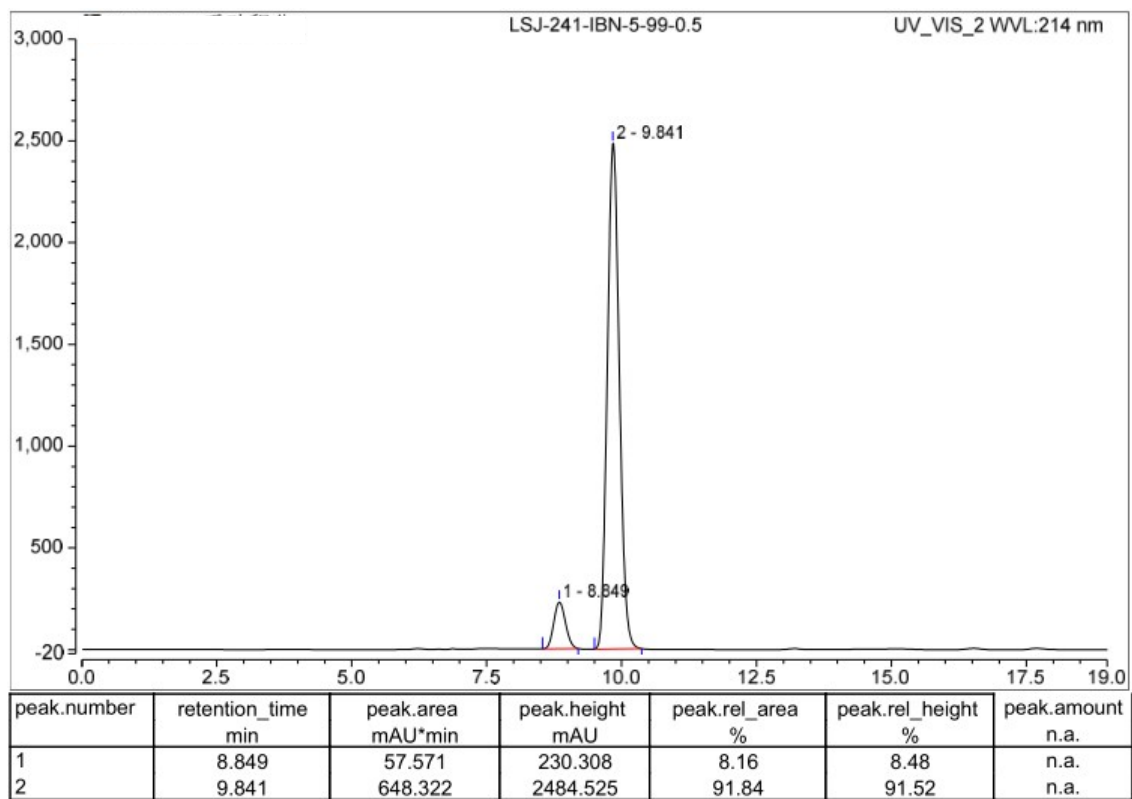

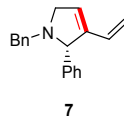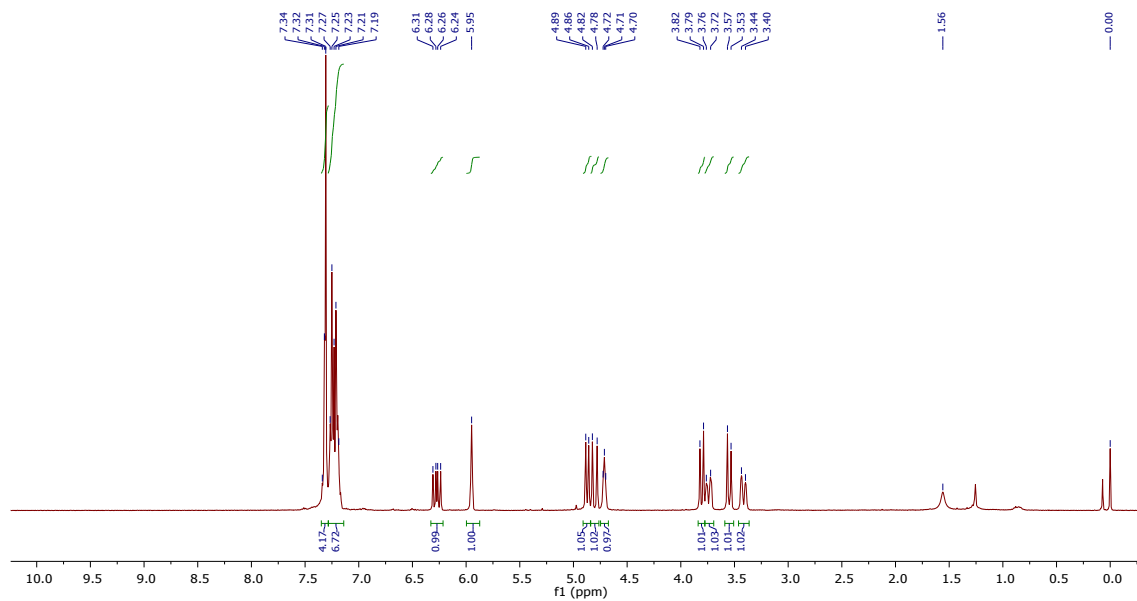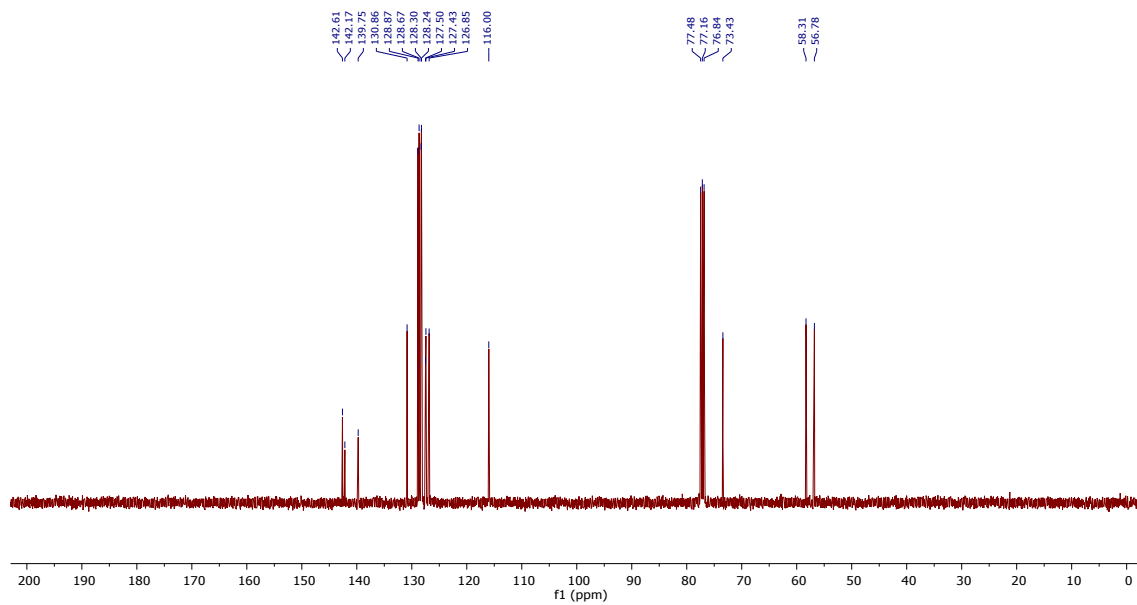

### HPLC trace of *rac-7*

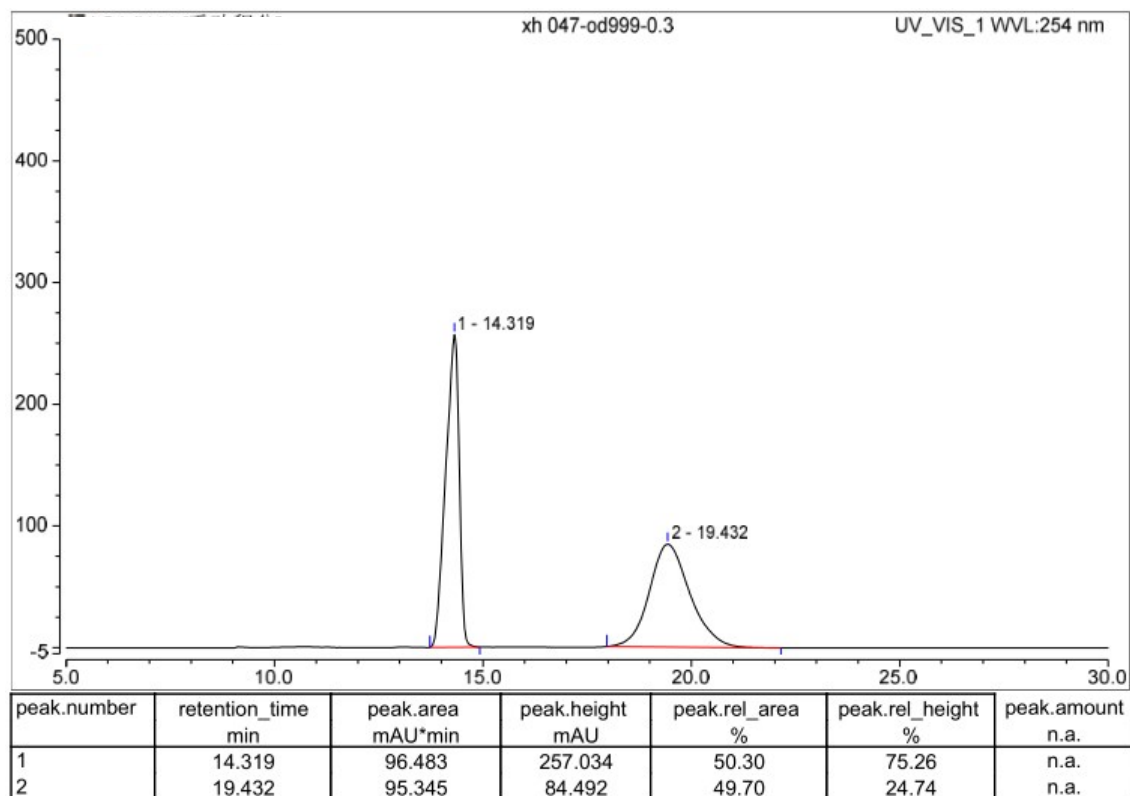

### HPLC trace of 7

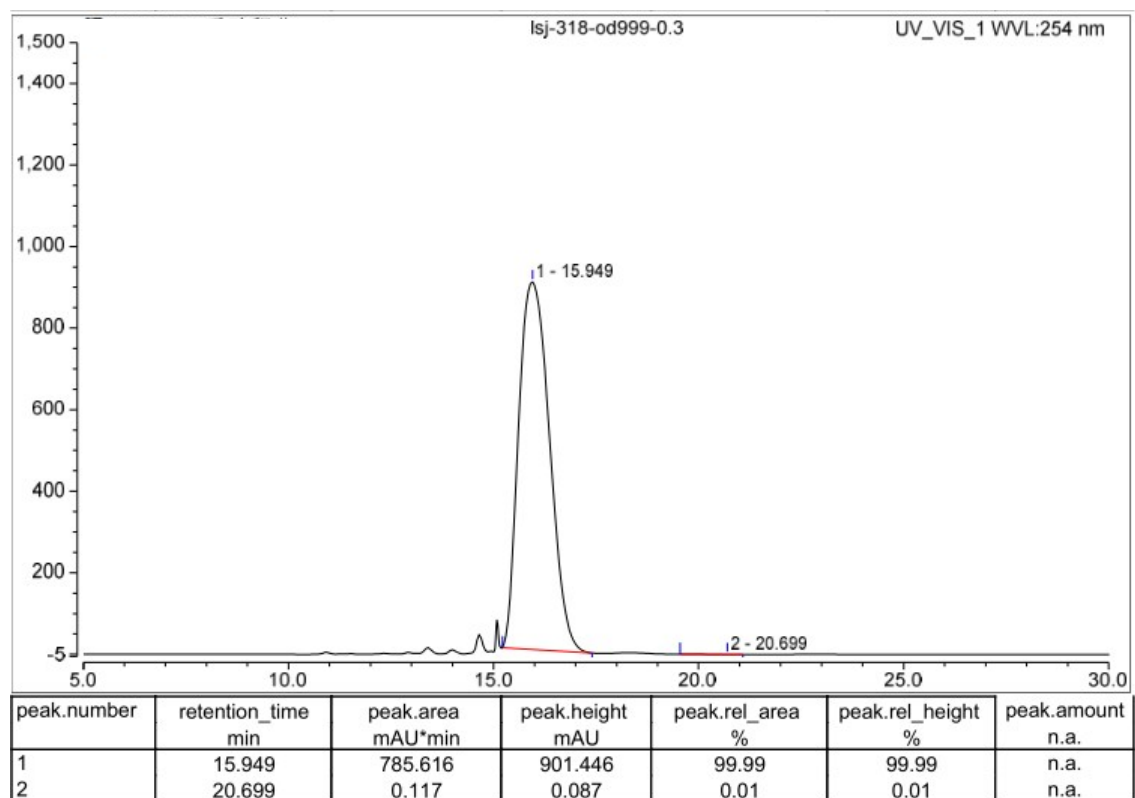

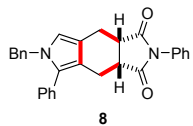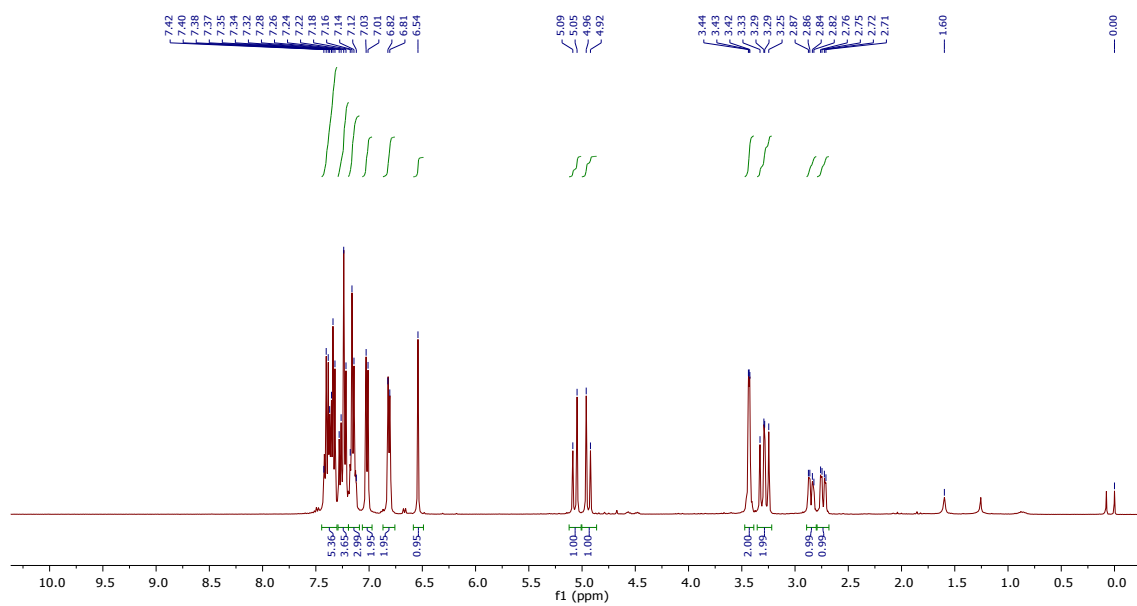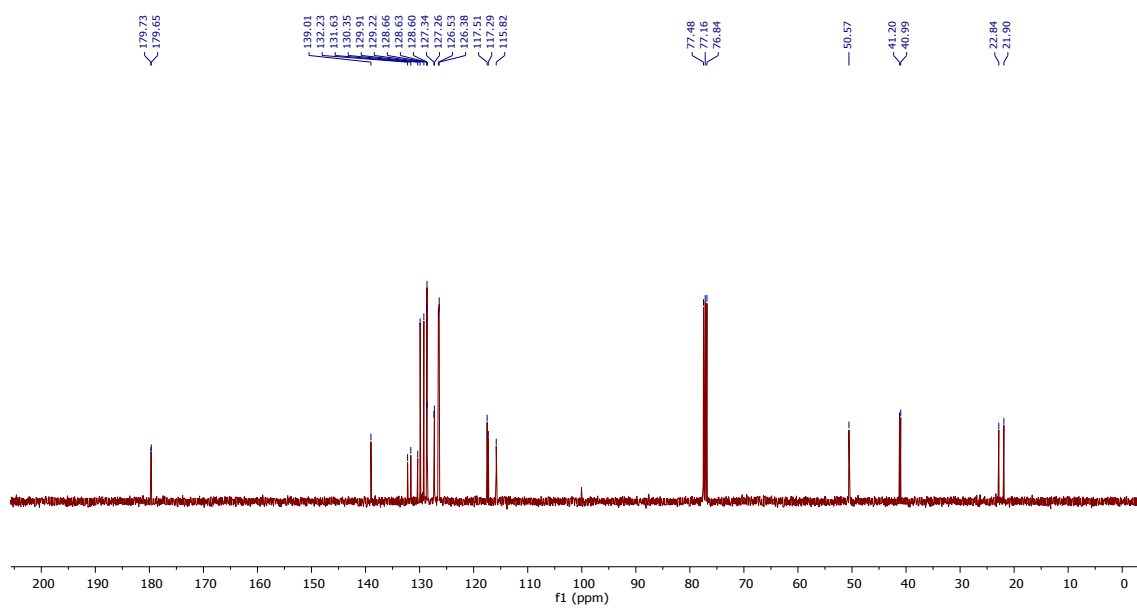



### HPLC trace of *rac-8*

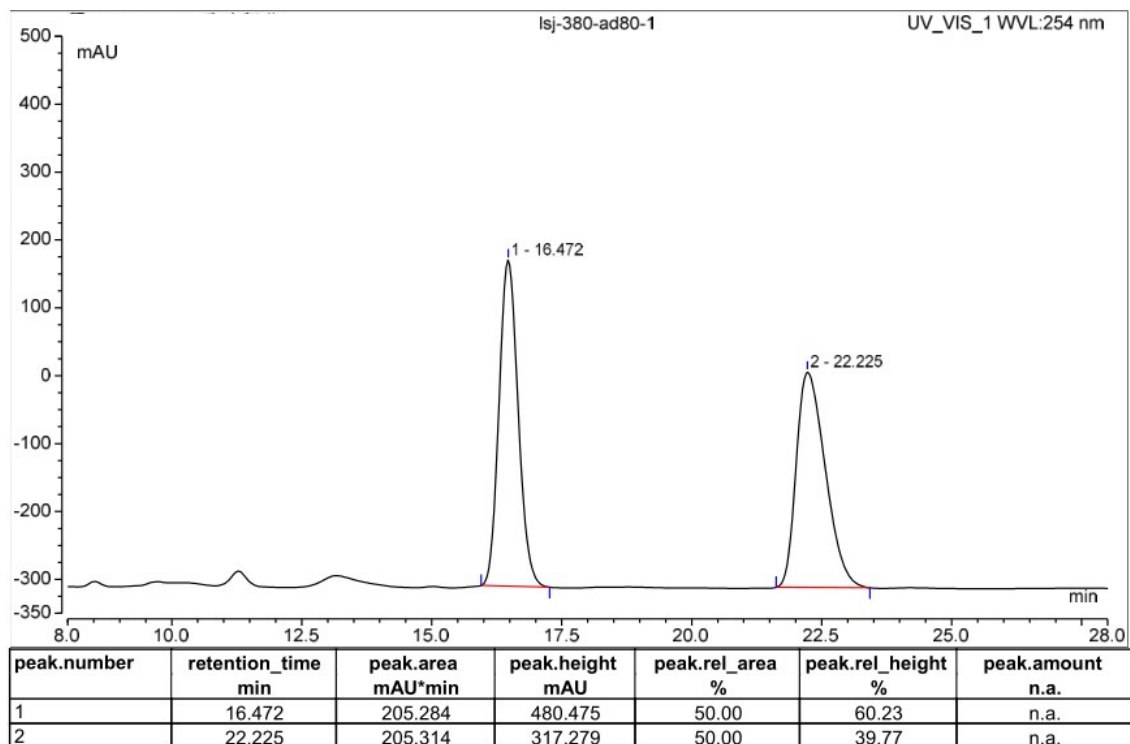

### HPLC trace of 8

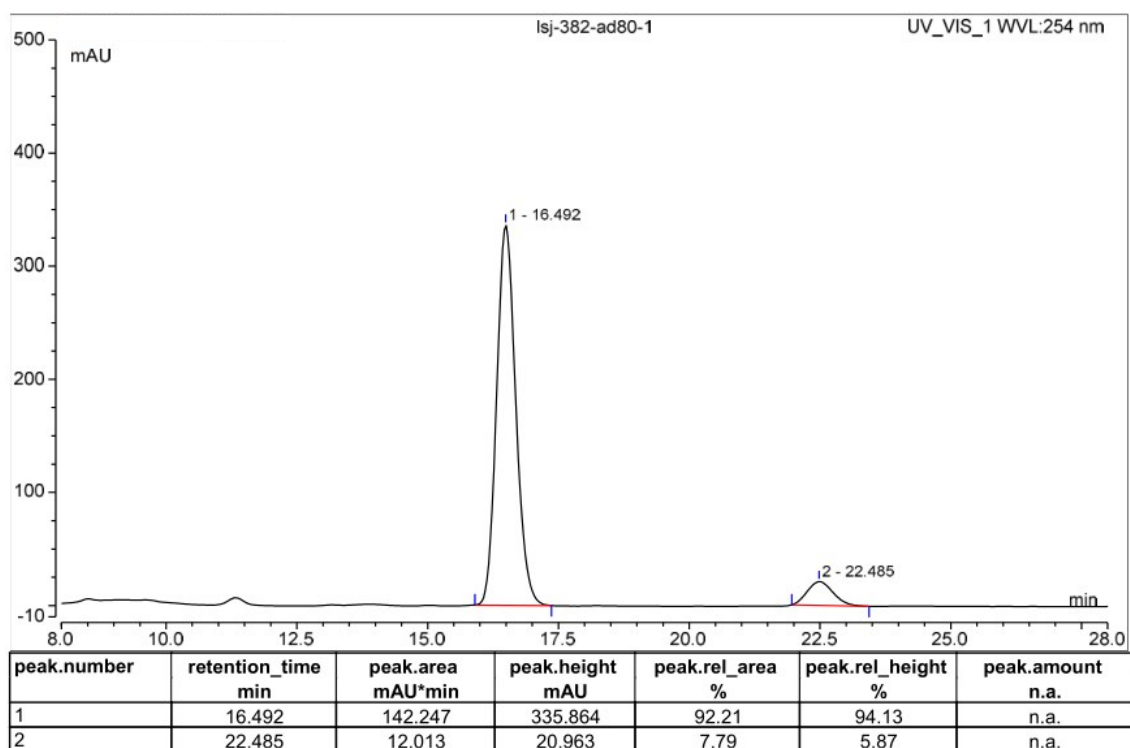

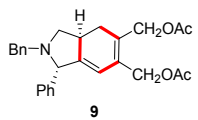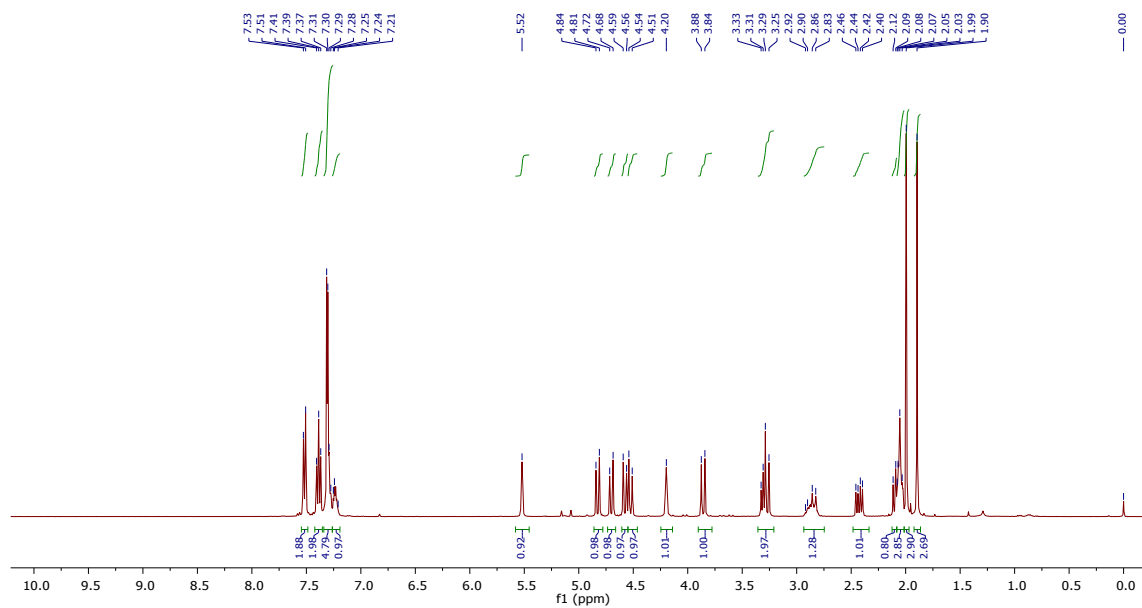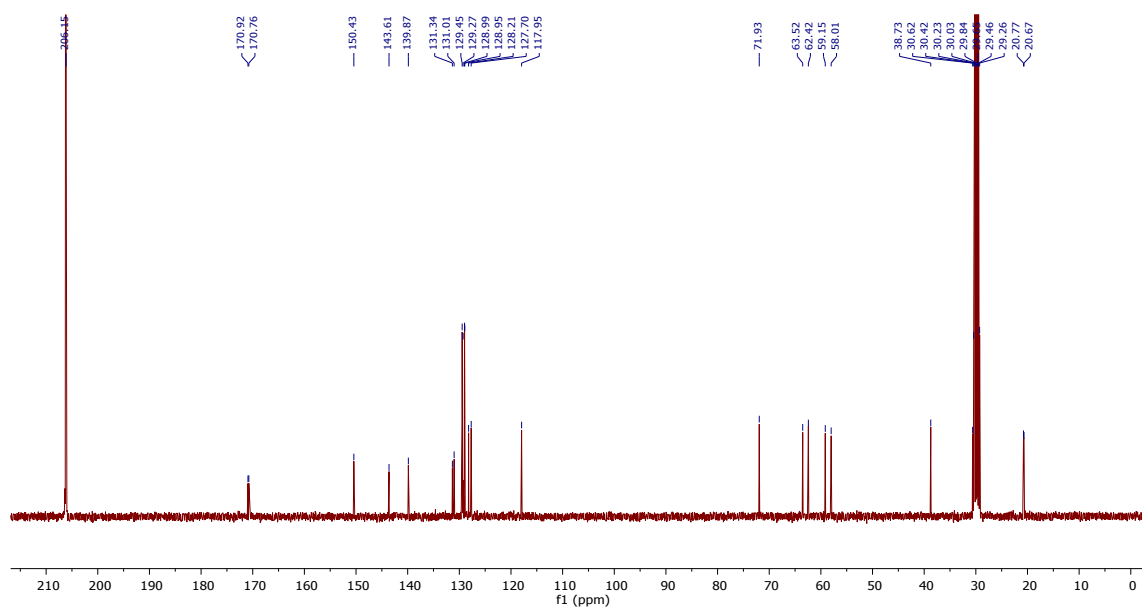

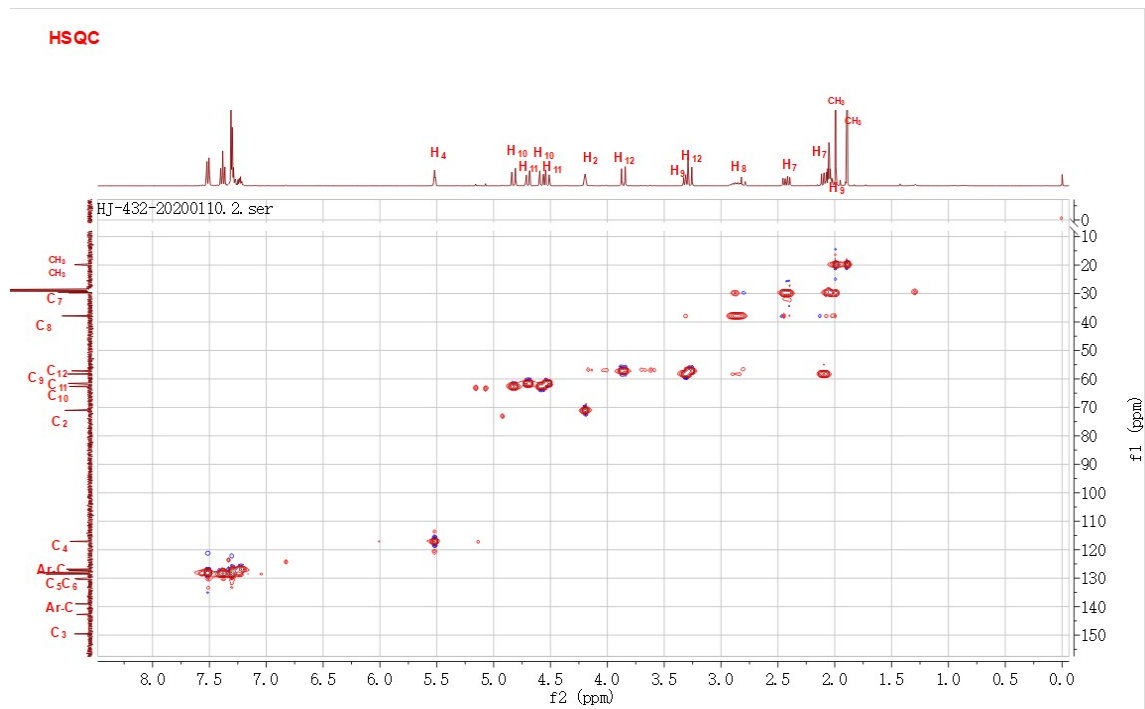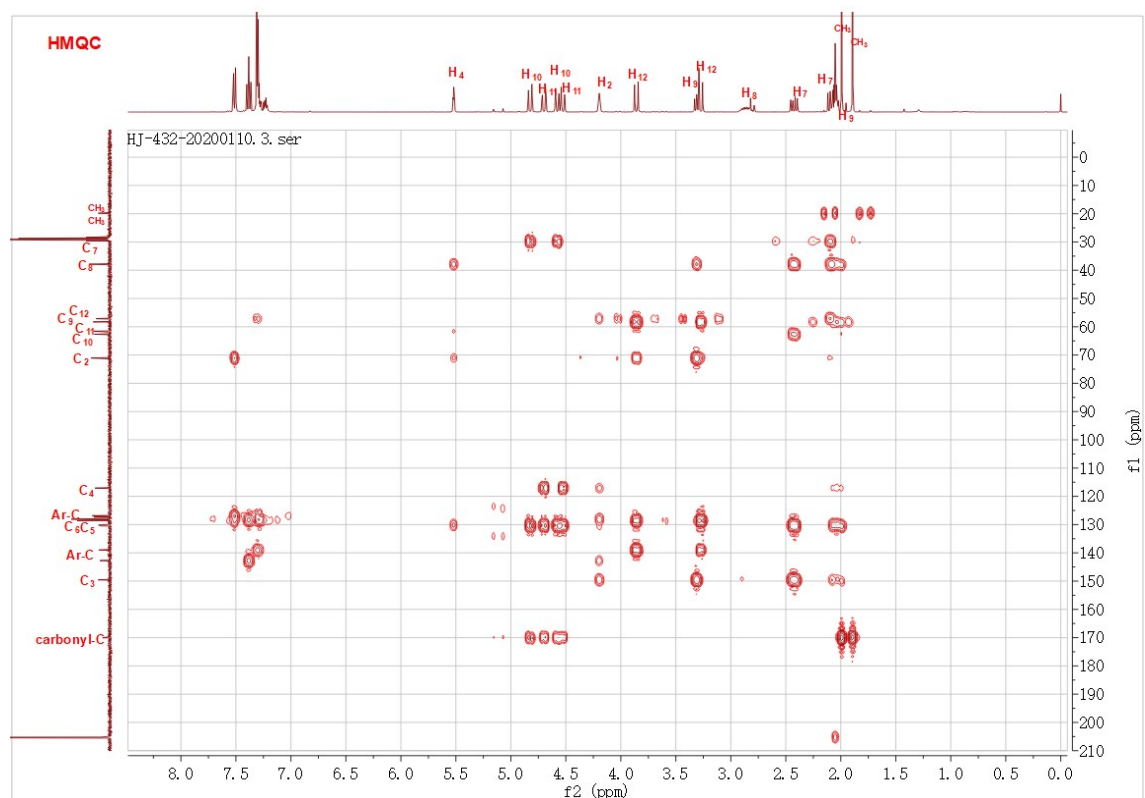

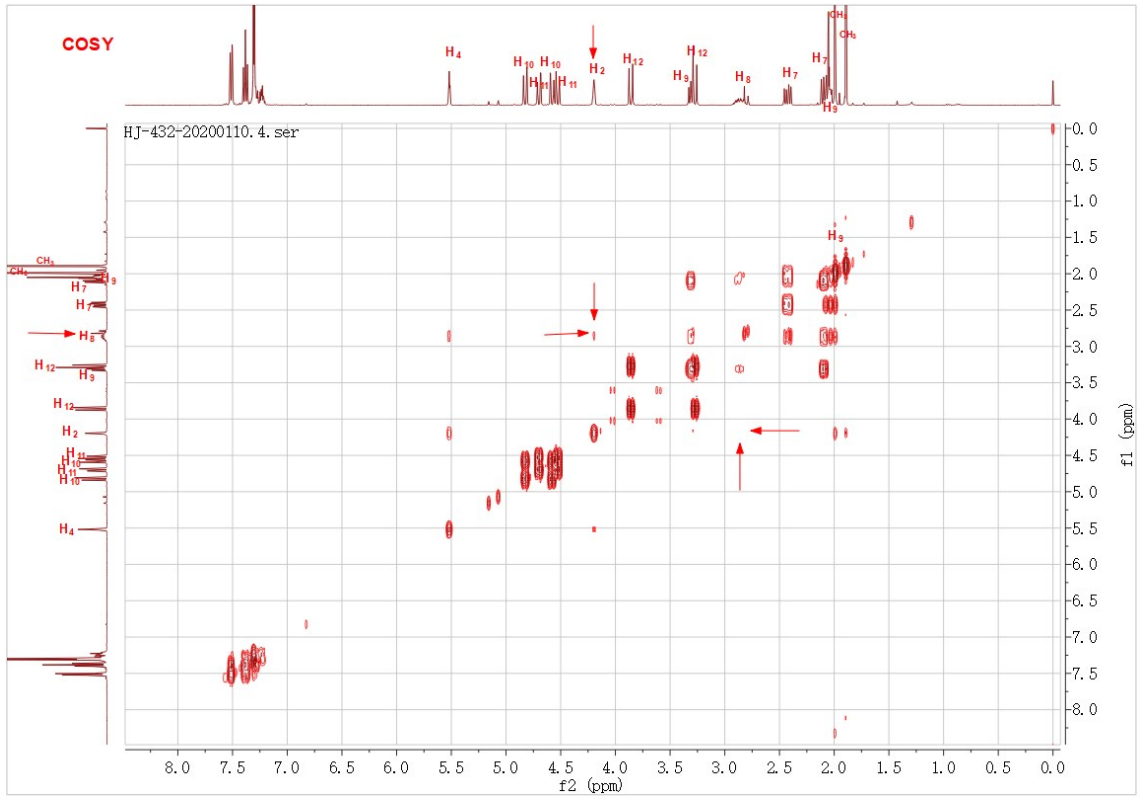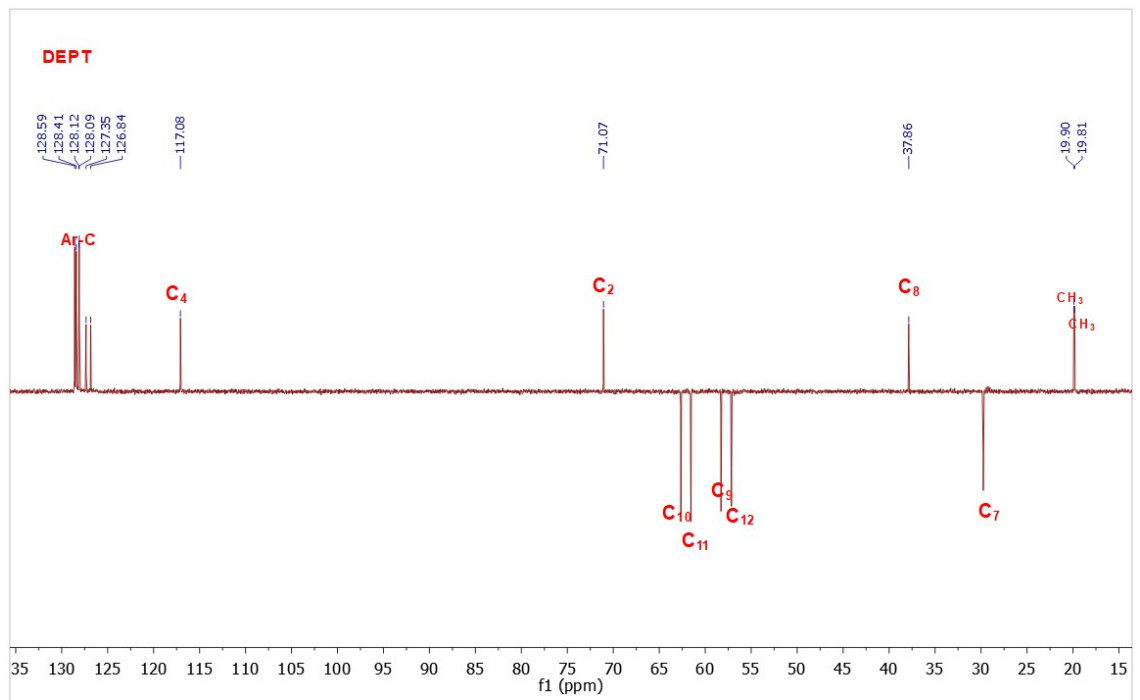

### HPLC trace of *rac-9*

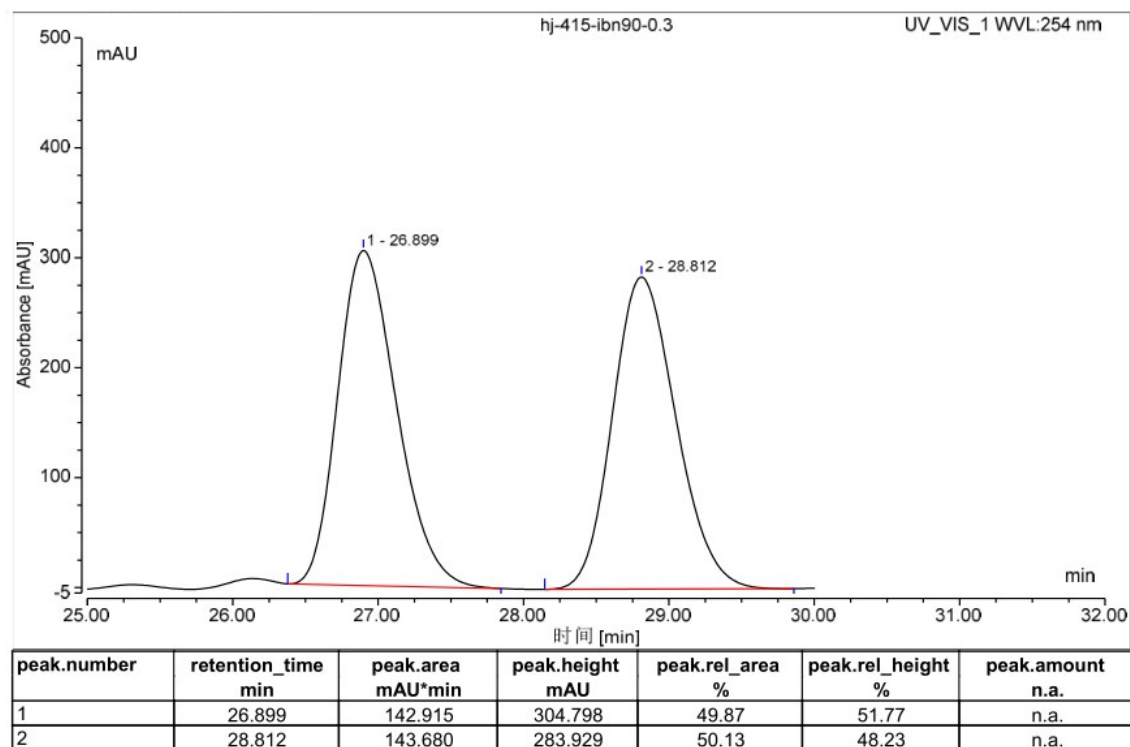

### HPLC trace of 9

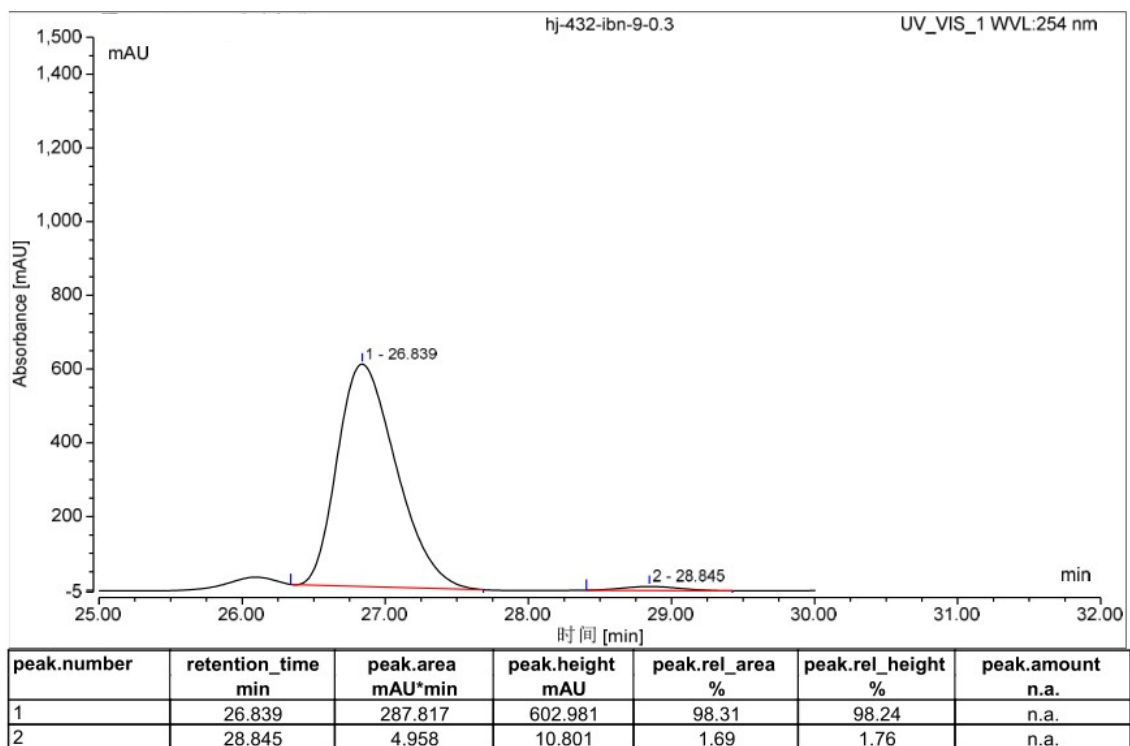

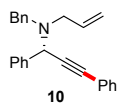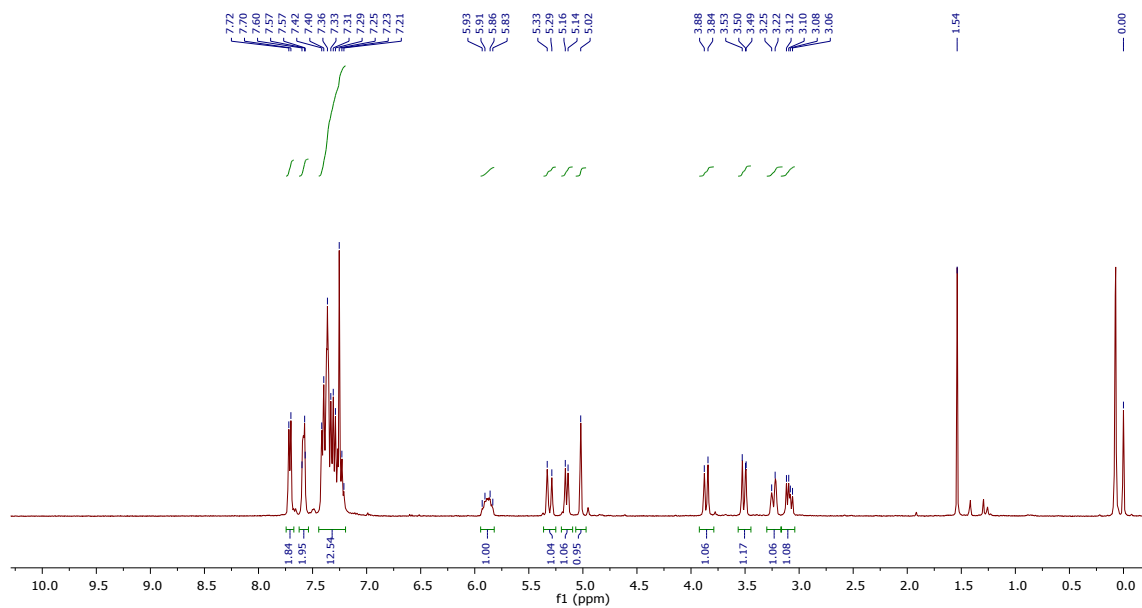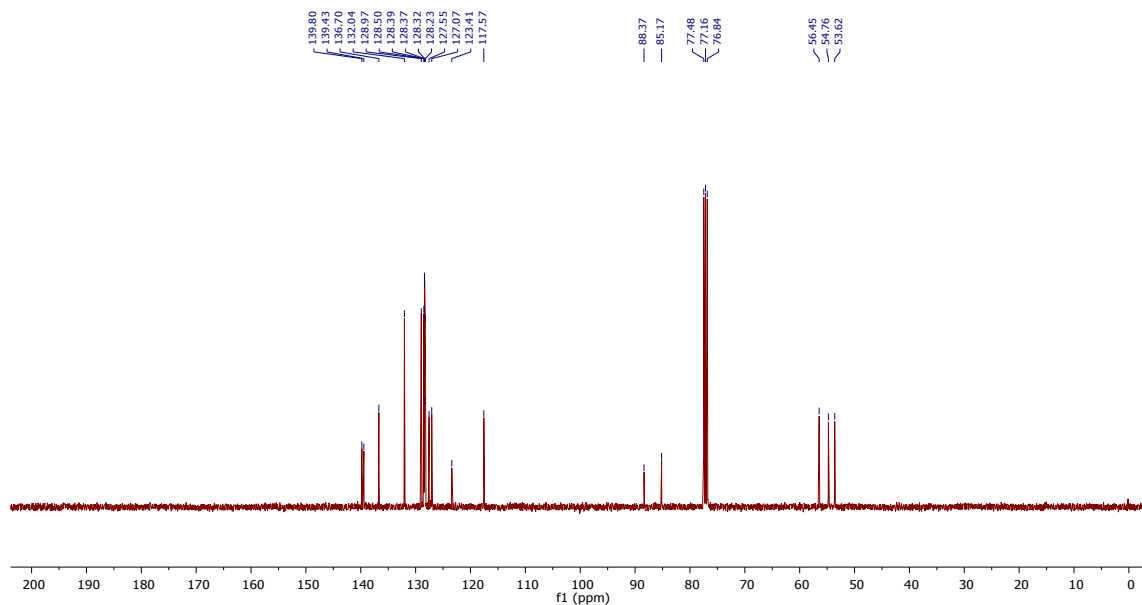

### HPLC trace of *rac*-10

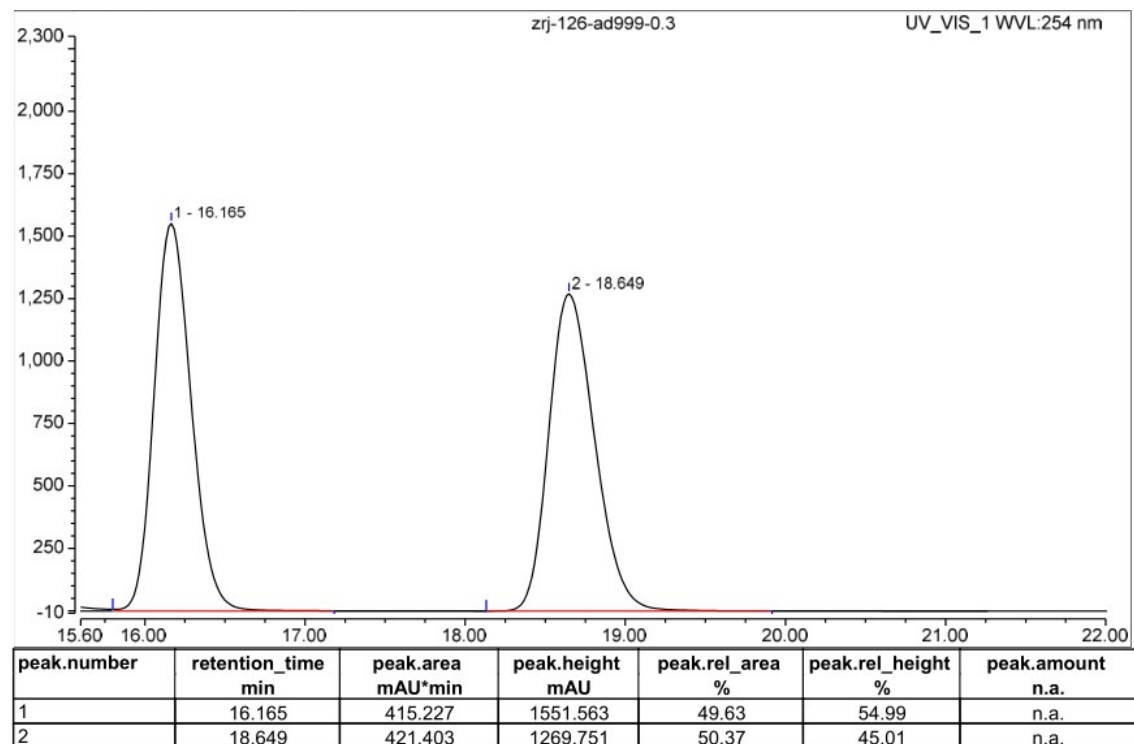

### HPLC trace of 10

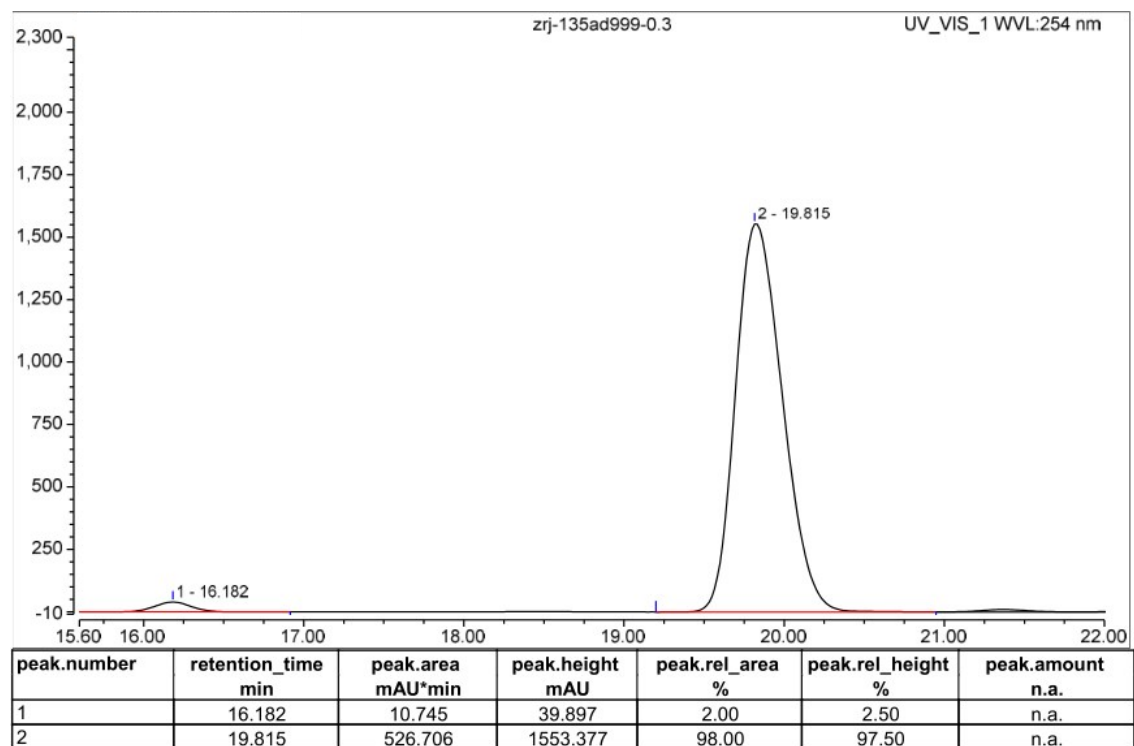

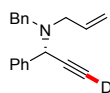

11

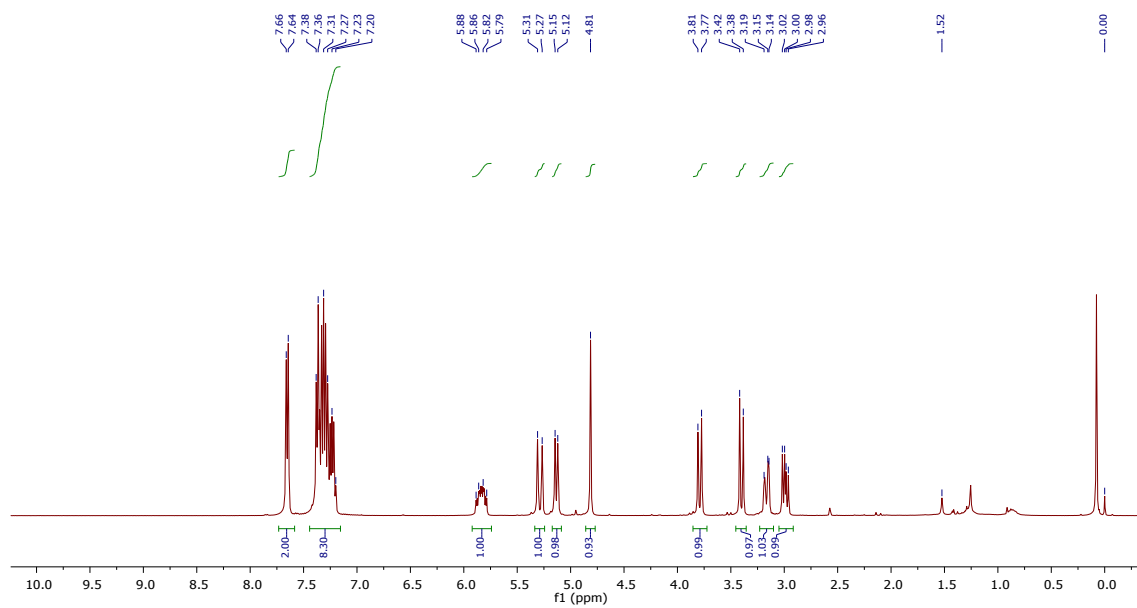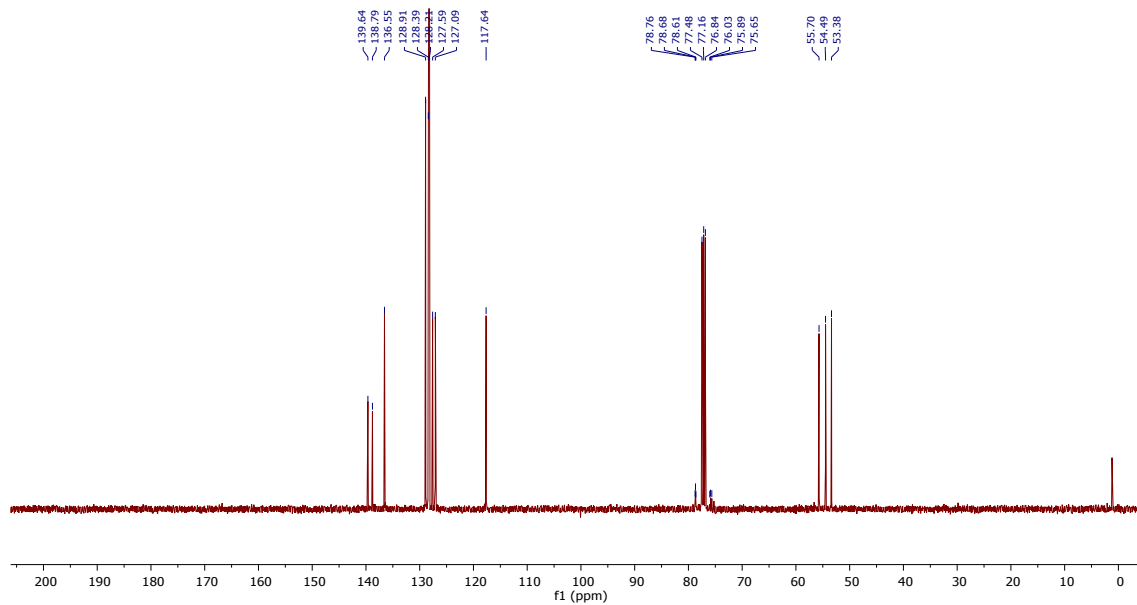



### HPLC trace of *rac*-11

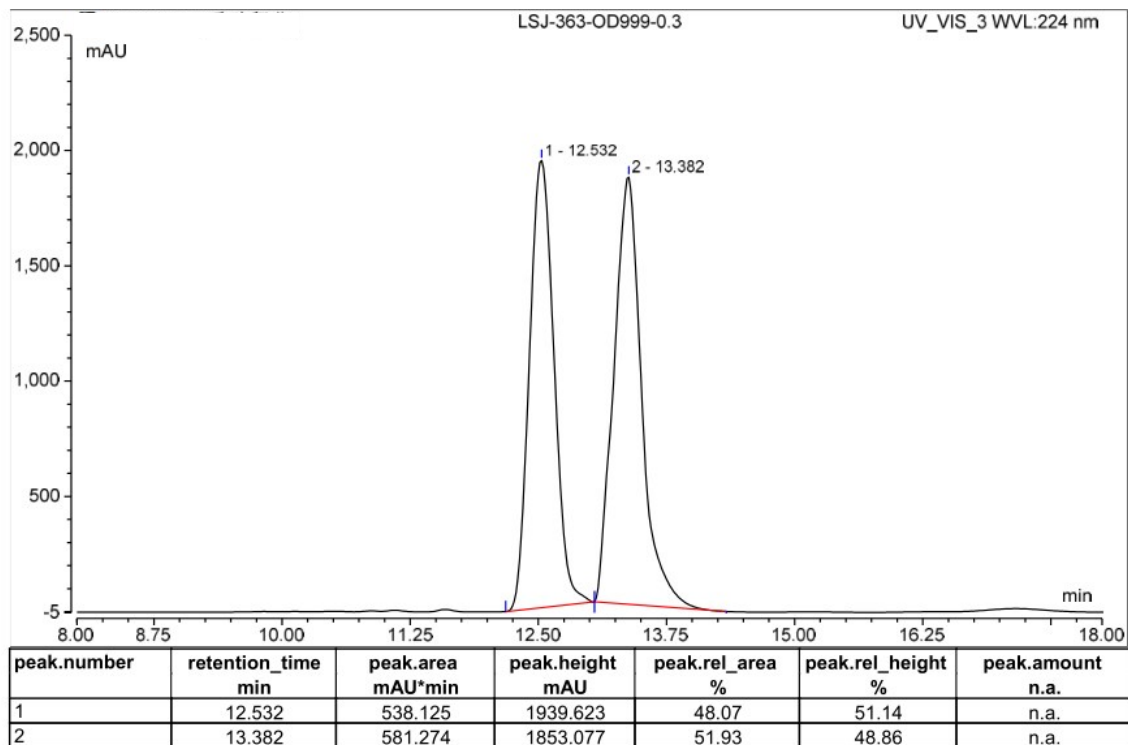

### HPLC trace of 11

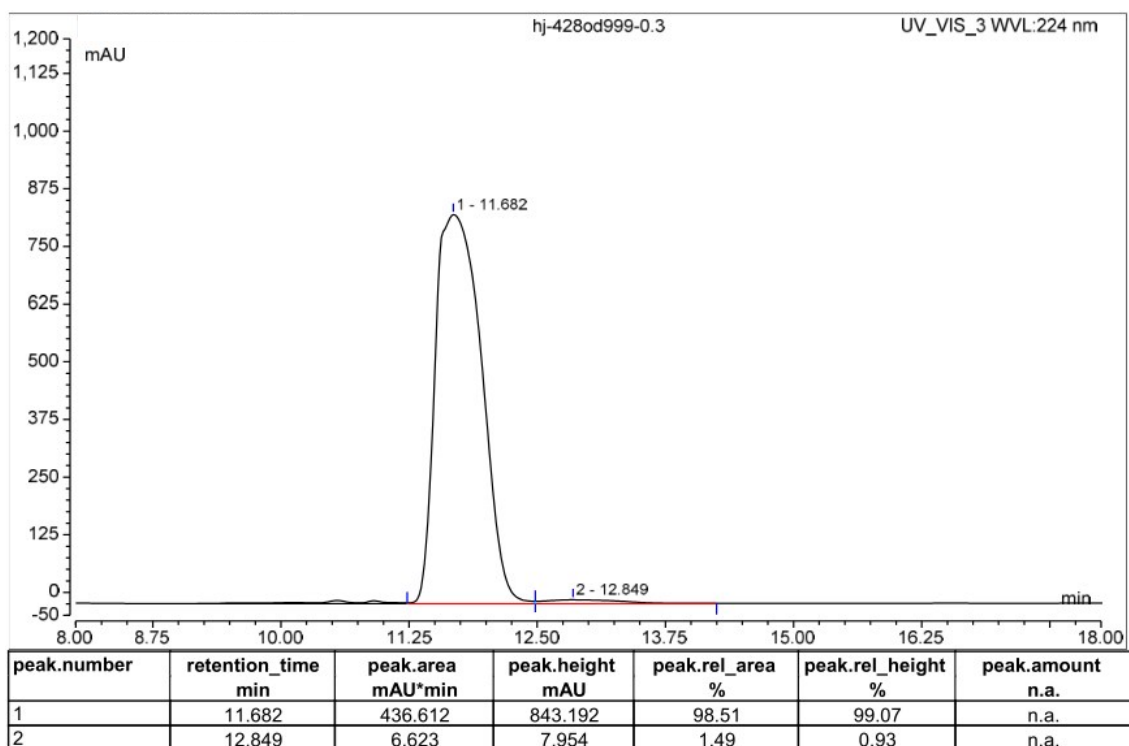

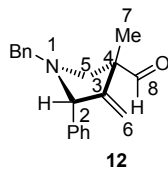

$^1\text{H-NMR}$ ,  $\text{CDCl}_3$   
400 MHz, 298K

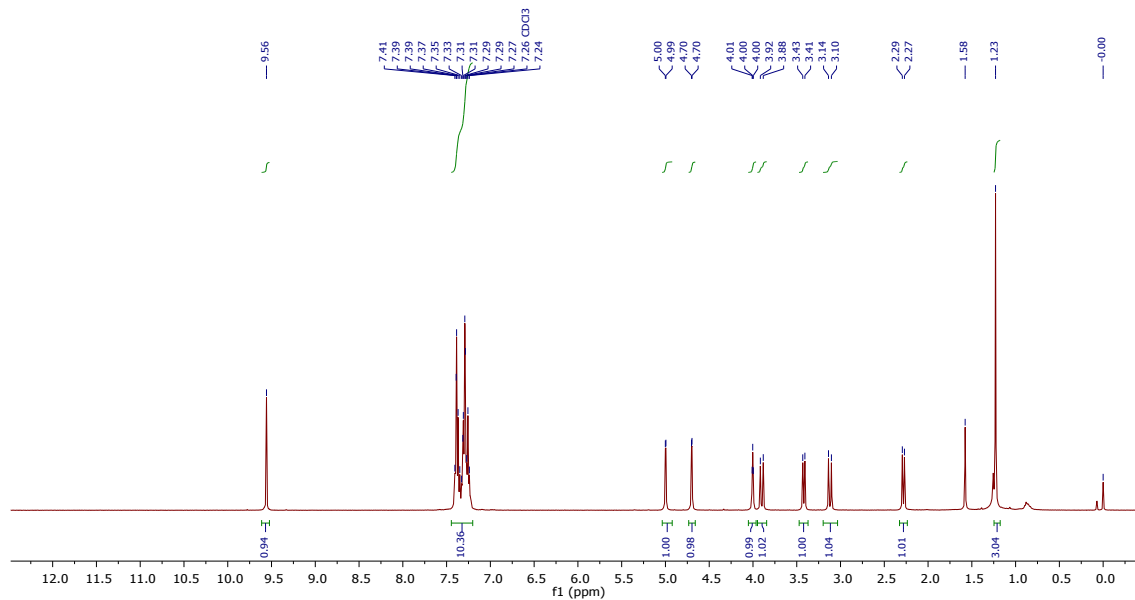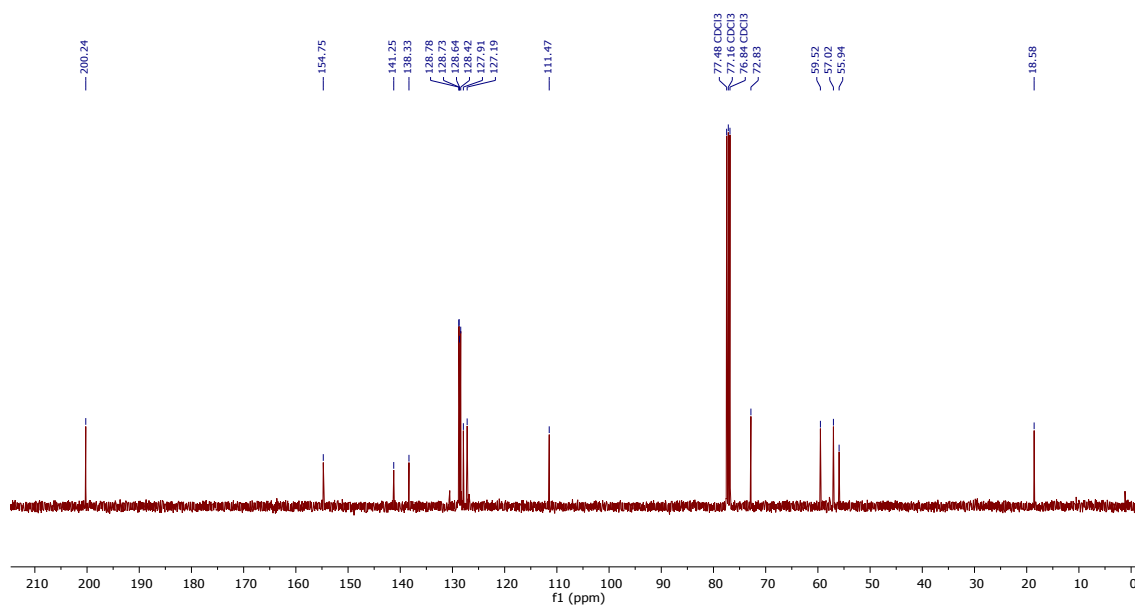

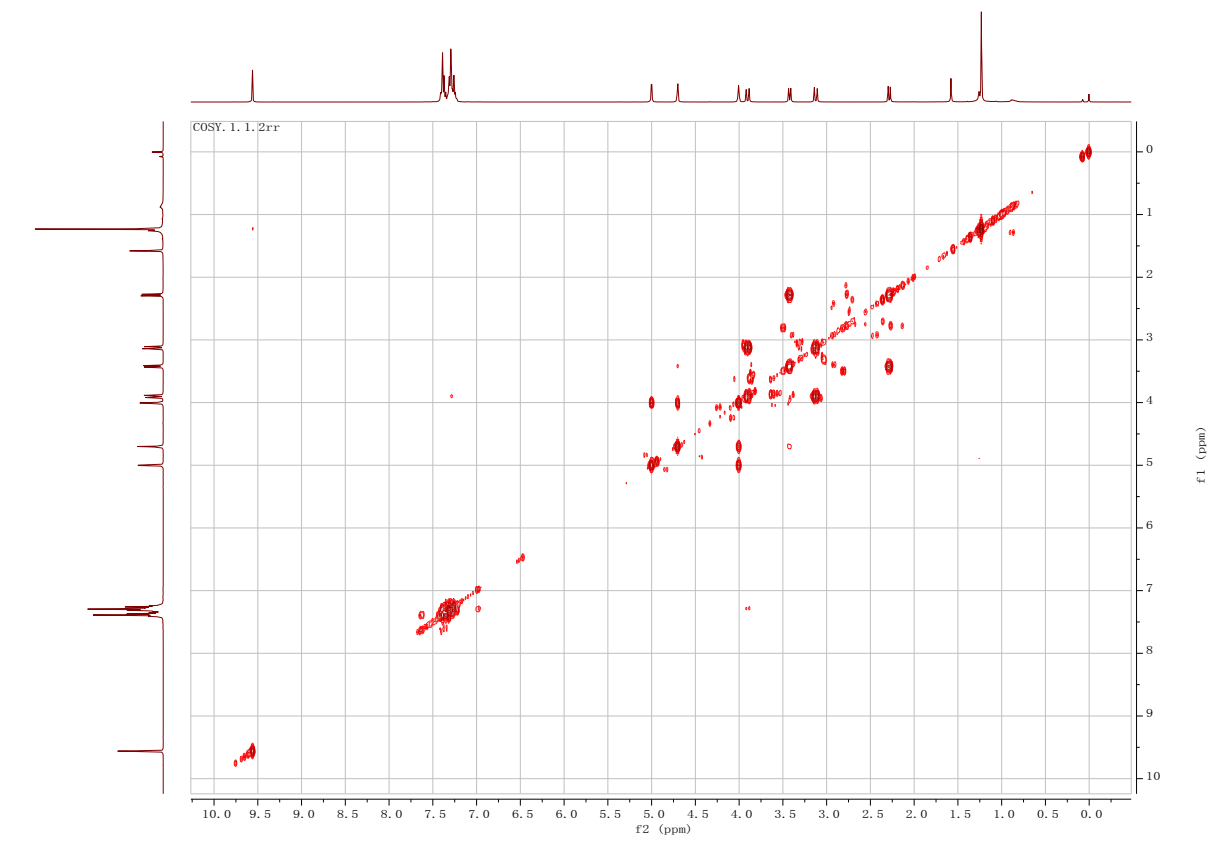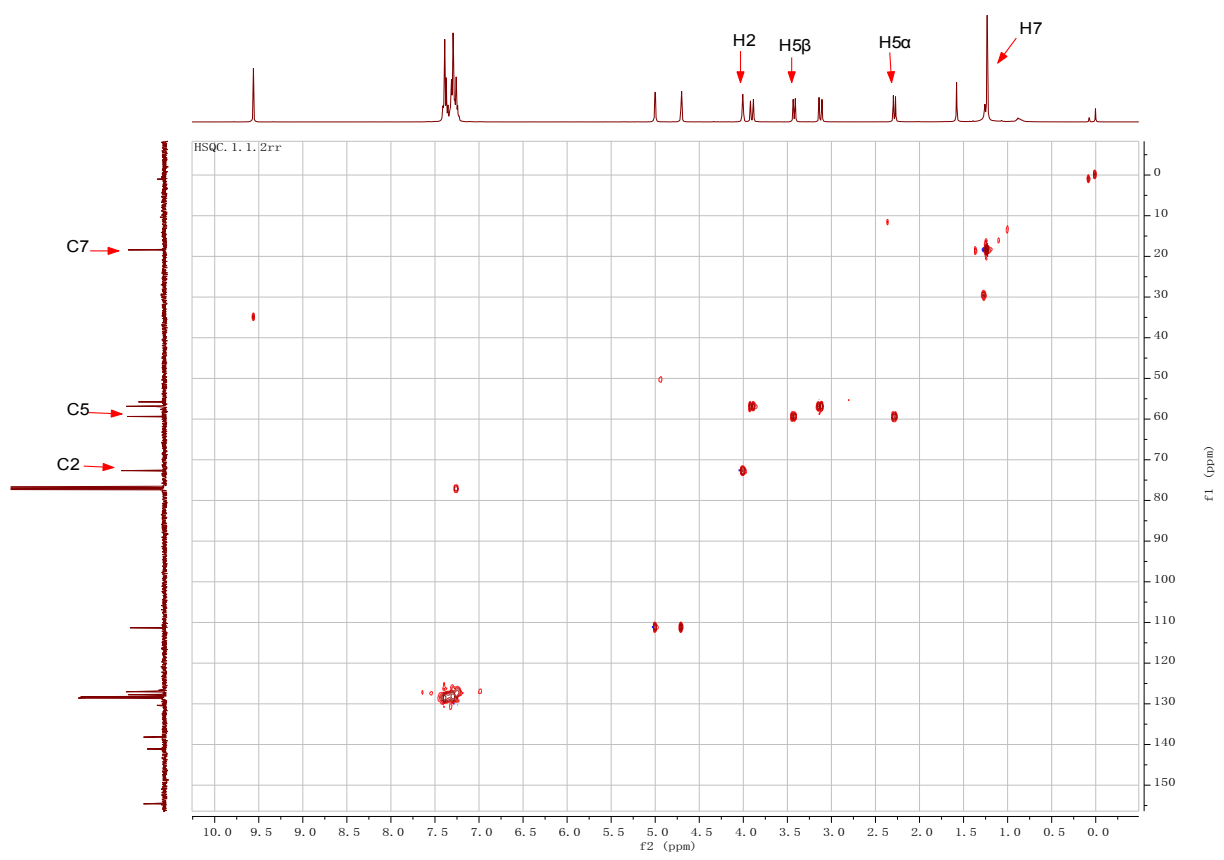

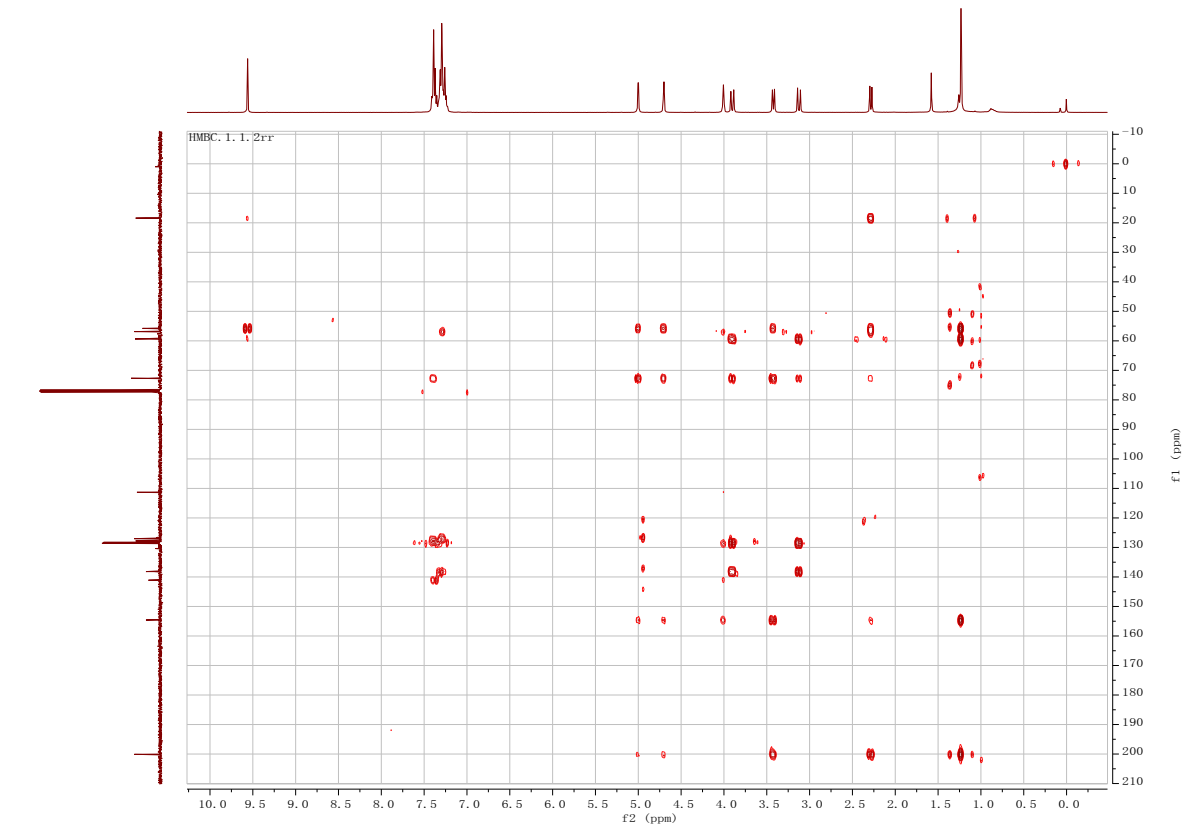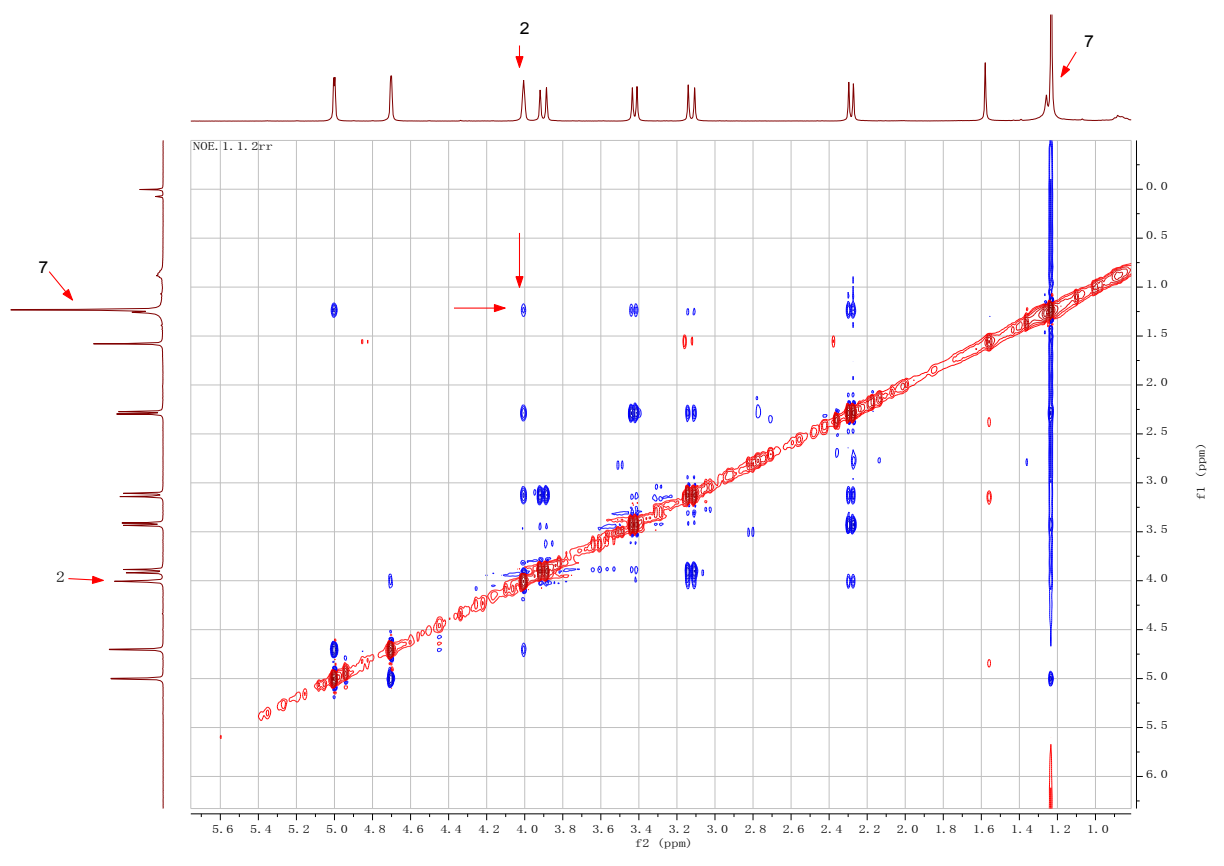

### HPLC trace of *rac*-12

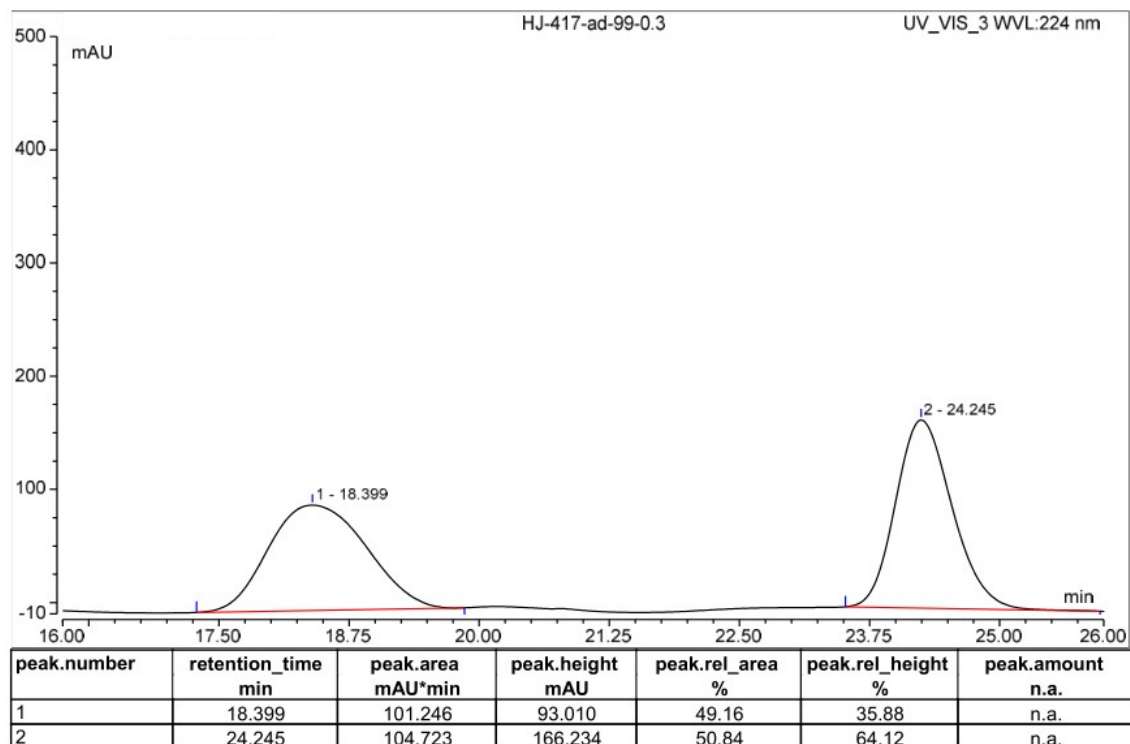

### HPLC trace of 12

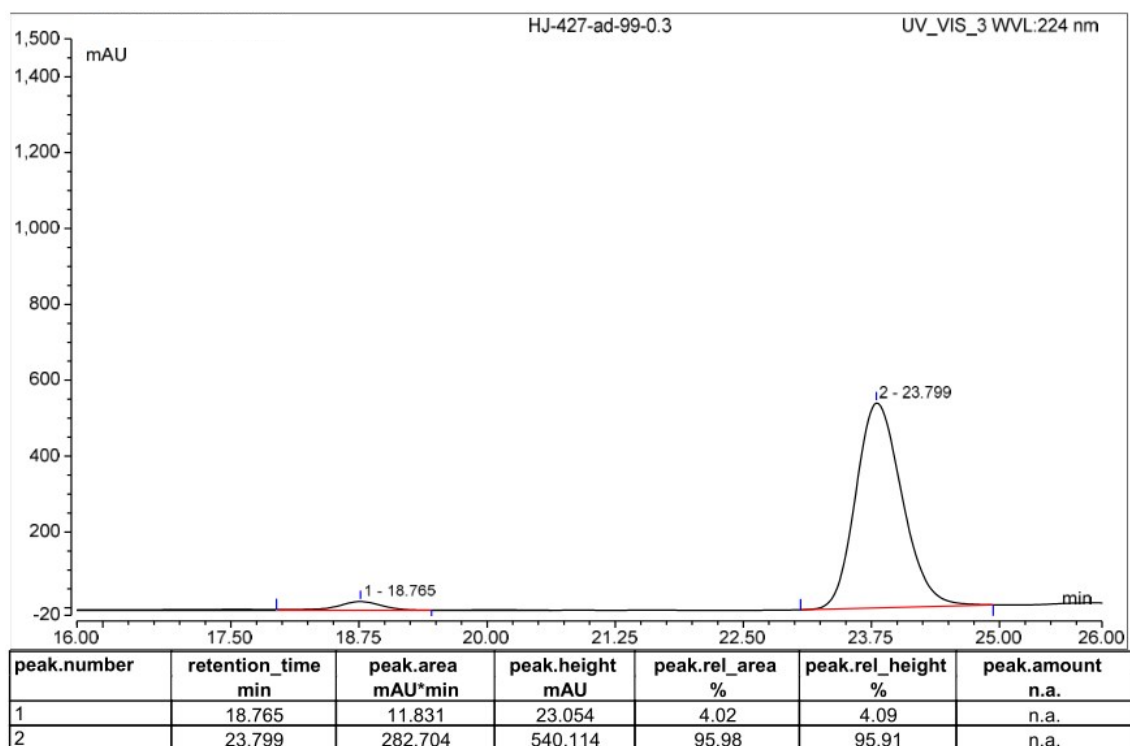

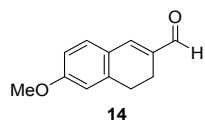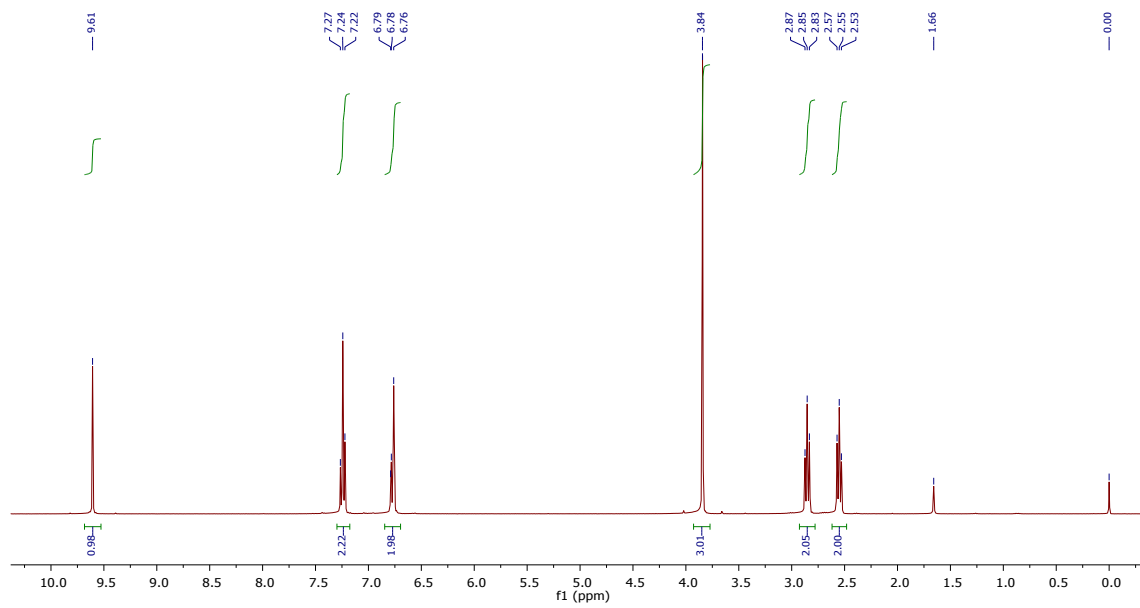

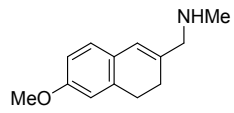

15

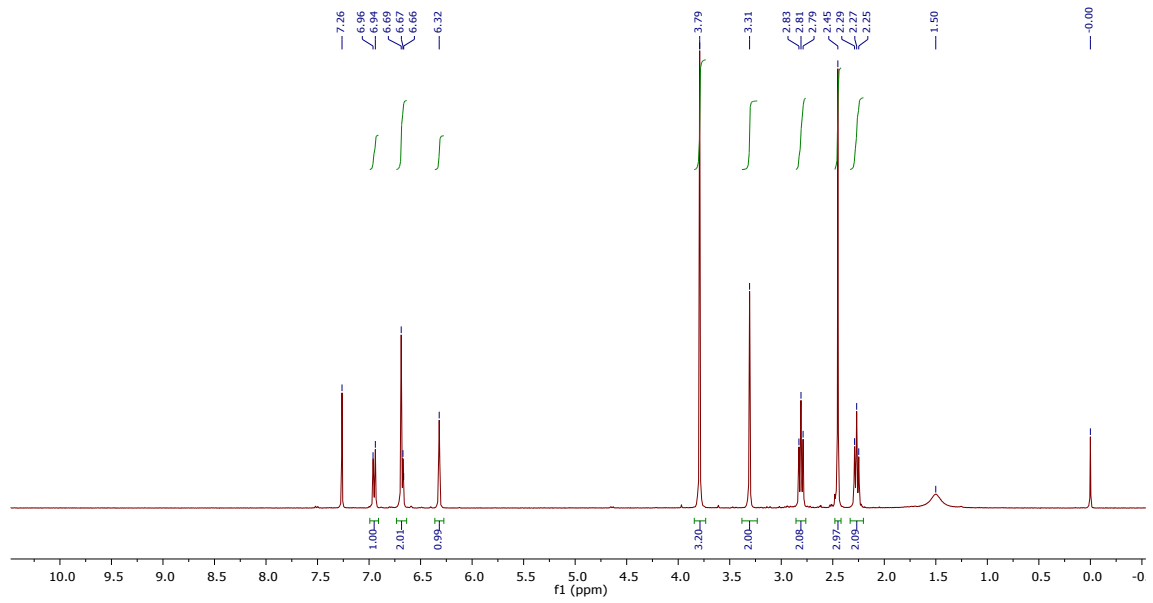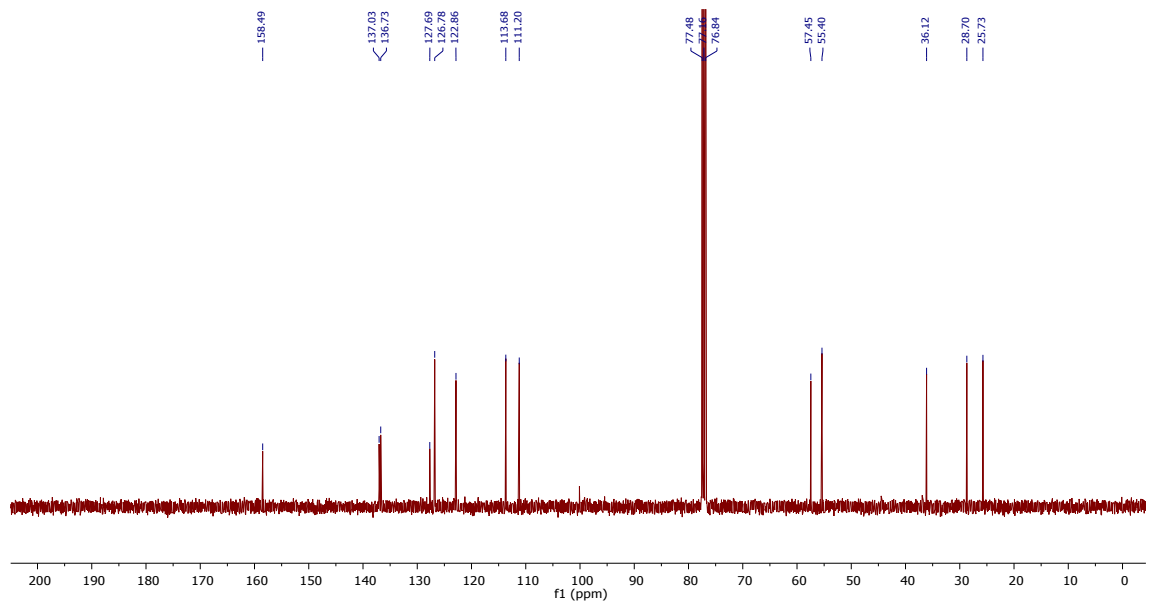

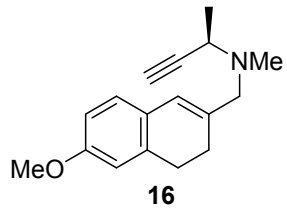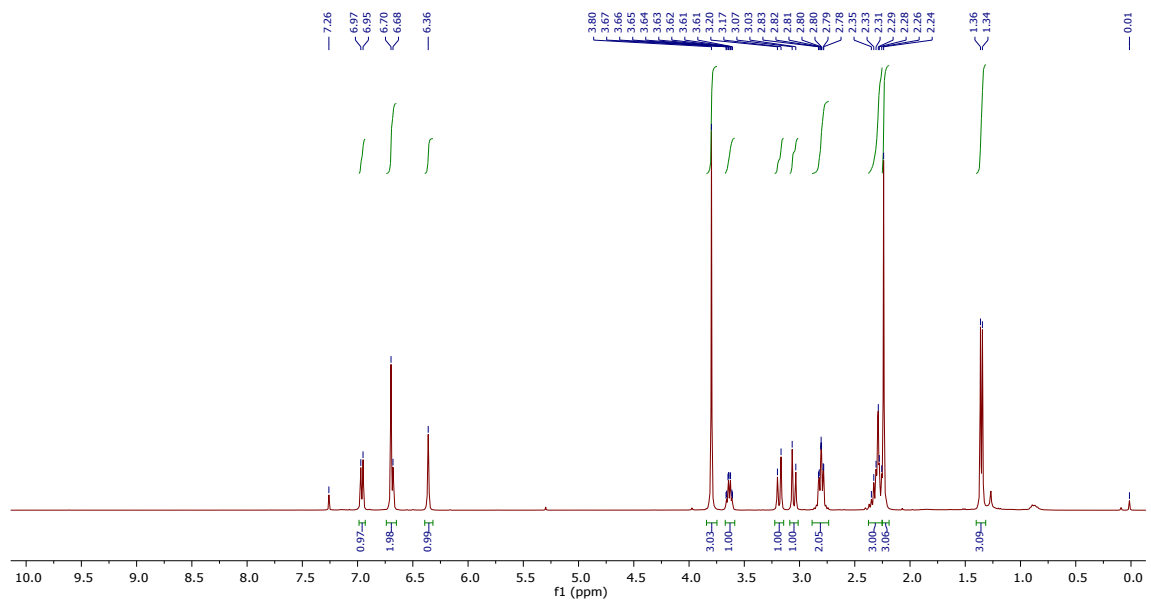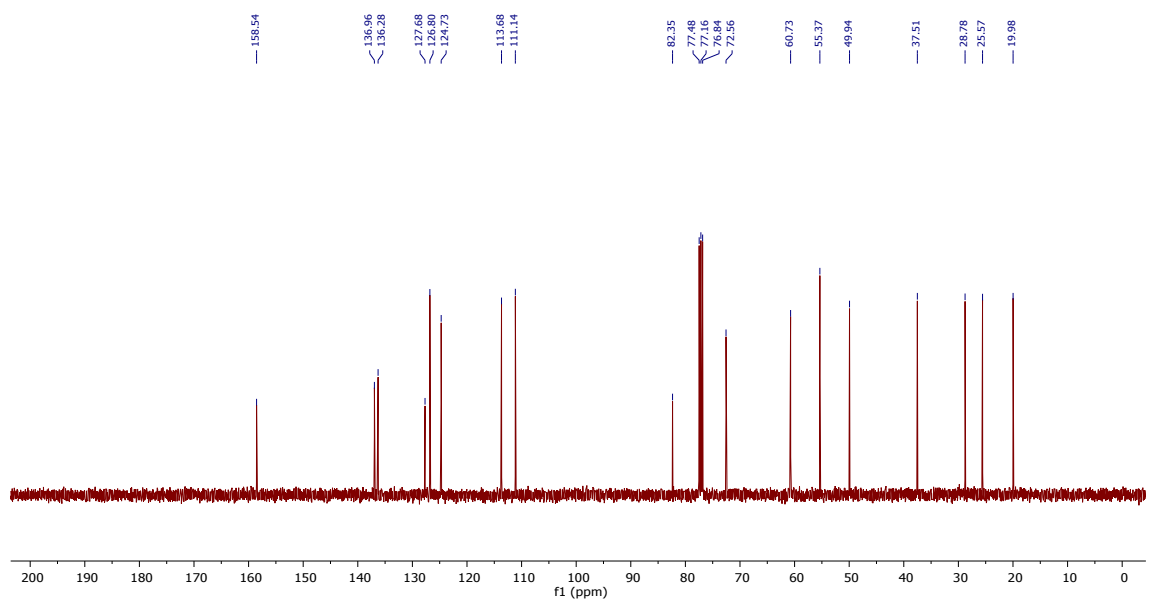



### HPLC trace of *rac*-16

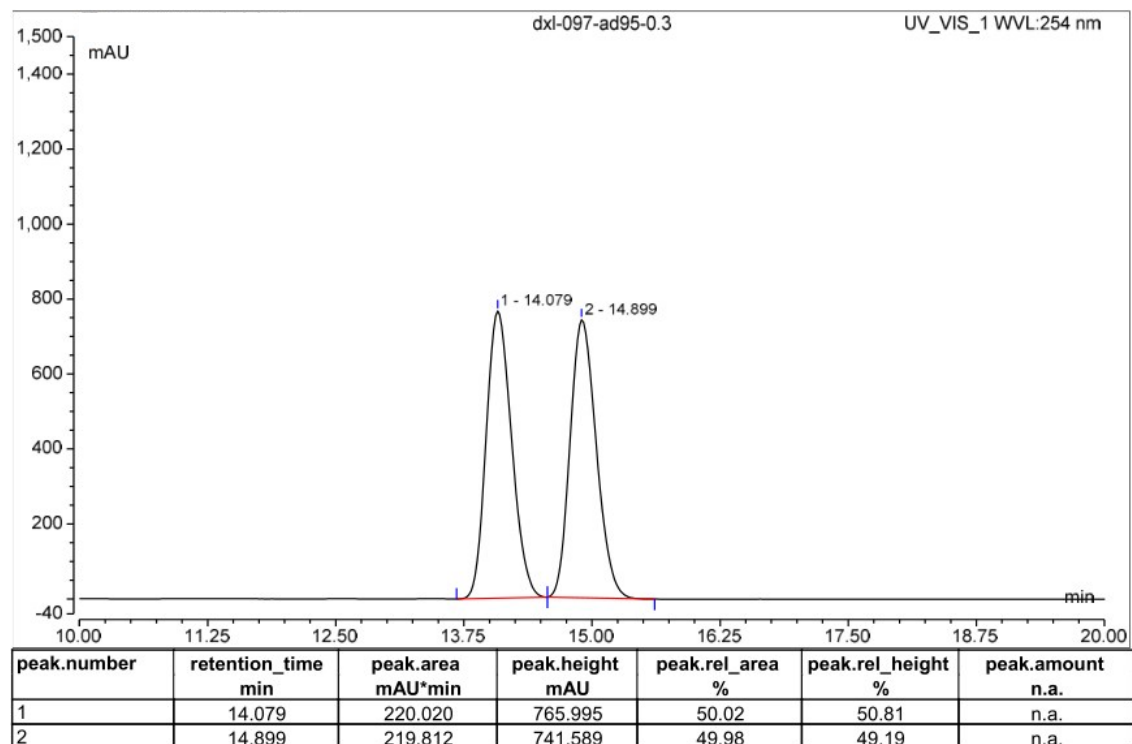

### HPLC trace of 16

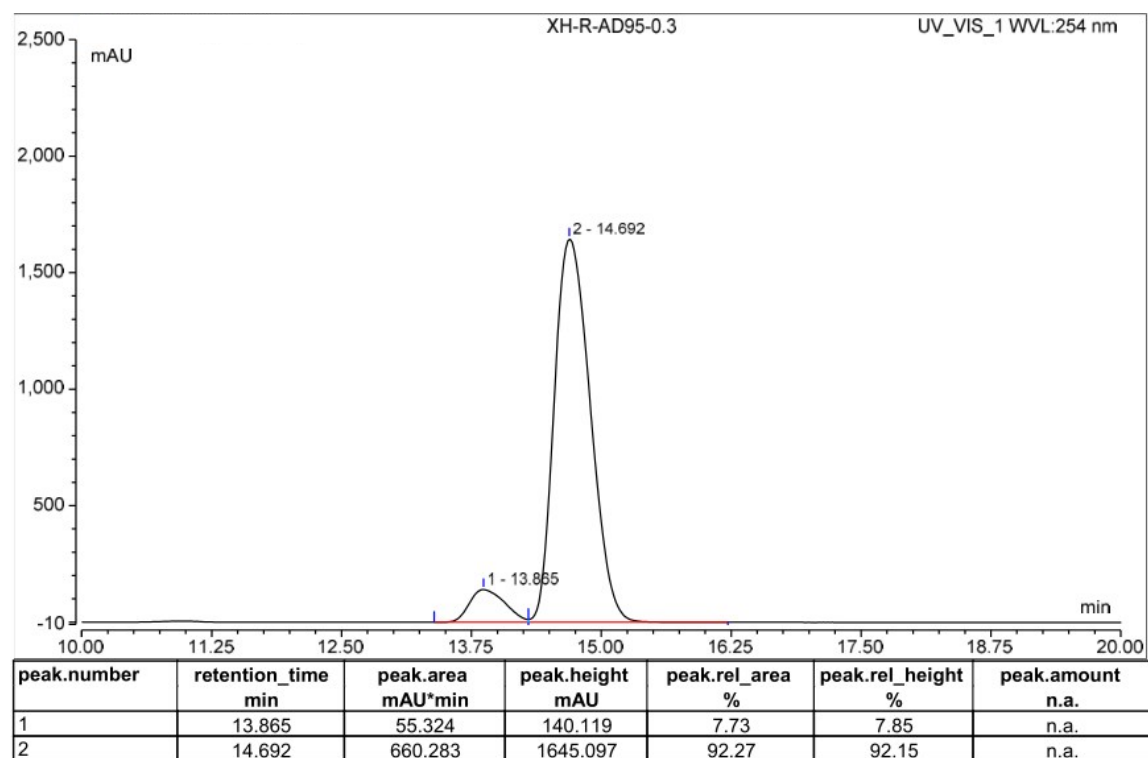

Supplement: d0ra07698h1.pdf [file d0ra07698h1.pdf]
